# Supplementary material for: A Candidate RNAi Screen Reveals Diverse RNA-Binding Protein Phenotypes in Drosophila Flight Muscle
Source: Preprints.org preprint supplement (doi:10.20944/preprints202108.0137.v1), 2021-08-05
Supplement: Supplementary file 1 [file supplementary]

## Sheet: guide
Kao et al, Supplmental Table 2 Contents
Tab Name	Figure	Description
Sunburst	Figure 1F, S2A	table includes counts data plotting in the sunburst diagrams of the number of RBP genes in each phenotypic cateogry
annotated_RBPs	Figure1, S1	list of all RBPs included in the 4 annotations: AmiGO, RIC, GLAD and SpliceosomeDatabase
MuscleExpressedRBPs	Figure1, S1, S2	table of gene identifiers for all 568 genes identified by at least 2 RBP annotations and expressed in muscle; includes DESeq2 normalized counts values used to generate heatmaps
Mfuzz_input	Figure 1B, S1E	table of normalized expression counts and standard normalized values used as input for 3 rounds of Mfuzz clustering
Mfuzz_clusters	Figure S1E	table of genes, cluster association and cluster membership values (alpha) for Mfuzz temporal expression profile clustering
Mfuzz_coreprofiles	Figure 1B	average expression profiles and number of genes in each Mfuzz cluster, used for plotting temporal expression heatmap
Venn_DERBPs	Figure S1F	genes in VennDiagram regions for differentially expressed RBPs between IFM and tubular leg, TDT and salm-/- IFM samples compared to RBP genes with DE exons between those samples
heatmap_log2FC_exons	Figure 1C	table of exon log2FC values plotted in the heatmap in Figure 1D and corresponding gene identifiers
heatmap_log2FC_genes	Figure 1D	table of log2FC values plotted in the heatmap in Figure 1C and corresponding gene identifiers

## Sheet: Sunburst
Muscle RBPs in Schnorrer et al screen (568 genes)
leafs	values (number of genes)			labels	colors
lethal-earlylarval-wildtype-wildtype	26			wildtype	#33a02c
lethal-earlylarval-wildtype-sarcomere	14			lethal	#08306b
lethal-earlylarval-fiber-wildtype	3			earlylarval	#08519c
lethal-earlylarval-fiber-sarcomere	9			latelarval	#2171b5
lethal-earlylarval-nodata	5			earlypupal	#4292c6
lethal-latelarval-wildtype-wildtype	21			latepupal	#6baed6
lethal-latelarval-wildtype-sarcomere	9			pharate	#9ecae1
lethal-latelarval-fiber-sarcomere	5			undefined	#c6dbef
lethal-latelarval-nodata	20
lethal-earlypupal	58			nodata	#bdbdbd
lethal-latepupal-wildtype-sarcomere	4
lethal-latepupal-fiber-sarcomere	1			fiber	#fc4e2a
lethal-latepupal-nodata	41			sarcomere	#feb24c
lethal-pharate	24
lethal-undefined	6			flightless	#bd0026
wildtype	163			weakflier	#fd8d3c
nodata	125			locomotion	#fed976
flightless-holder-wildtype-wildtype	9			holder	#ffffcc
flightless-holder-wildtype-sarcomere	4
flightless-holder-fiber-sarcomere	2
flightless-holder-fiber-nodata	1
flightless-holder-nodata	2
weakflier	13
locomotion	3
all RBPs in Schnorrer et al screen (1924 genes)
leafs	values (number of genes)			labels	colors
lethal-earlylarval-wildtype-wildtype	49			wildtype	#33a02c
lethal-earlylarval-wildtype-sarcomere	36			lethal	#08306b
lethal-earlylarval-fiber-wildtype	5			earlylarval	#08519c
lethal-earlylarval-fiber-sarcomere	19			latelarval	#2171b5
lethal-earlylarval-nodata	11			earlypupal	#4292c6
lethal-latelarval-wildtype-wildtype	68			latepupal	#6baed6
lethal-latelarval-wildtype-sarcomere	25			pharate	#9ecae1
lethal-latelarval-fiber-wildtype	2			undefined	#c6dbef
lethal-latelarval-fiber-sarcomere	8			nodata	#bdbdbd
lethal-latelarval-nodata	48			fiber	#fc4e2a
lethal-earlypupal-wildtype-sarcomere	2			sarcomere	#feb24c
lethal-earlypupal-fiber-sarcomere	2			flightless	#bd0026
lethal-earlypupal-nodata	155			weakflier	#fd8d3c
lethal-latepupal-wildtype-sarcomere	3			locomotion	#fed976
lethal-latepupal-fiber-wildtype	6			holder	#ffffcc
lethal-latepupal-fiber-sarcomere	6
lethal-latepupal-nodata	146
lethal-pharate-wildtype-sarcomere	3
lethal-pharate-nodata	58
lethal-undefined	11
wildtype	736
nodata	415
flightless-holder-wildtype-wildtype	22
flightless-holder-wildtype-sarcomere	15
flightless-holder-fiber-wildtype	1
flightless-holder-fiber-sarcomere	10
flightless-holder-fiber-nodata	1
flightless-holder-nodata	12
weakflier	37
locomotion	10

## Sheet: annotated_RBPs
RBPannotation	FBgn	gene_symbol	symbol	CGnumber	new_FBgn
AmiGO	FBgn0287774	CG9143	CG9143	CG9143	FBgn0287774
AmiGO	FBgn0262955	RpII140	RpII140	CG3180	FBgn0262955
AmiGO	FBgn0004882	orb	orb	CG10868	FBgn0004882
AmiGO	FBgn0010220	Dbp45A	Dbp45A	CG12759	FBgn0010220
AmiGO	FBgn0003275	RpII18	RpII18	CG1163	FBgn0003275
AmiGO	FBgn0019660	lncRNA	lncRNA:roX2	CR32665	FBgn0019660
AmiGO	FBgn0004855	RpII15	RpII15	CG3284	FBgn0004855
AmiGO	FBgn0261938	mtRNApol	mtRNApol	CG4644	FBgn0261938
AmiGO	FBgn0019938	RpI1	RpI1	CG10122	FBgn0019938
AmiGO	FBgn0033528	trsn	trsn	CG11761	FBgn0033528
AmiGO	FBgn0038499	Brf	Brf	CG31256	FBgn0038499
AmiGO	FBgn0015737	Hmu	Hmu	CG3373	FBgn0015737
AmiGO	FBgn0003277	RpII215	RpII215	CG1554	FBgn0003277
AmiGO	FBgn0026086	Adar	Adar	CG12598	FBgn0026086
AmiGO	FBgn0086683	Spf45	Spf45	CG17540	FBgn0086683
AmiGO	FBgn0260944	Rbp1	Rbp1	CG17136	FBgn0260944
AmiGO	FBgn0026373	Rpb3	Rpb3	CG7885	FBgn0026373
AmiGO	FBgn0005649	Rox8	Rox8	CG5422	FBgn0005649
AmiGO	FBgn0036811	MED11	MED11	CG6884	FBgn0036811
AmiGO	FBgn0003278	RpI135	RpI135	CG4033	FBgn0003278
AmiGO	FBgn0011802	Gem3	Gem3	CG6539	FBgn0011802
AmiGO	FBgn0033380	Phax	Phax	CG8069	FBgn0033380
AmiGO	FBgn0028471	Nab2	Nab2	CG5720	FBgn0028471
AmiGO	FBgn0037327	PEK	PEK	CG2087	FBgn0037327
AmiGO	FBgn0286027	Rnmt	Rnmt	CG3688	FBgn0286027
AmiGO	FBgn0010263	Rbp9	Rbp9	CG3151	FBgn0010263
AmiGO	FBgn0014024	Rnp4F	Rnp4F	CG3312	FBgn0014024
AmiGO	FBgn0286051	Rexo5	Rexo5	CG8368	FBgn0286051
AmiGO	FBgn0260943	Rbp6	Rbp6	CG32169	FBgn0260943
AmiGO	FBgn0030354	Upf1	Upf1	CG1559	FBgn0030354
AmiGO	FBgn0260648	Rrp40	Rrp40	CG31938	FBgn0260648
AmiGO	FBgn0036915	Prp3	Prp3	CG7757	FBgn0036915
AmiGO	FBgn0030711	Rrp47	Rrp47	CG8928	FBgn0030711
AmiGO	FBgn0037716	Son	Son	CG8273	FBgn0037716
AmiGO	FBgn0037707	RnpS1	RnpS1	CG16788	FBgn0037707
AmiGO	FBgn0033316	Gle1	Gle1	CG14749	FBgn0033316
AmiGO	FBgn0053504	snRNA	snRNA:U7	CR33504	FBgn0053504
AmiGO	FBgn0010258	Rbp4	Rbp4	CG9654	FBgn0010258
AmiGO	FBgn0037368	CG1239	CG1239	CG1239	FBgn0037368
AmiGO	FBgn0264270	Sxl	Sxl	CG43770	FBgn0264270
AmiGO	FBgn0264001	bru3	bru3	CG43744	FBgn0264001
AmiGO	FBgn0034834	LS2	LS2	CG3162	FBgn0034834
AmiGO	FBgn0002899	mus301	mus301	CG7972	FBgn0002899
AmiGO	FBgn0024987	ssx	ssx	CG3056	FBgn0024987
AmiGO	FBgn0037939	CG14718	CG14718	CG14718	FBgn0037939
AmiGO	FBgn0027602	CG8611	CG8611	CG8611	FBgn0027602
AmiGO	FBgn0037561	CG9630	CG9630	CG9630	FBgn0037561
AmiGO	FBgn0266581	pit	pit	CG6375	FBgn0266581
AmiGO	FBgn0036754	CG5589	CG5589	CG5589	FBgn0036754
AmiGO	FBgn0004556	Dbp73D	Dbp73D	CG9680	FBgn0004556
AmiGO	FBgn0036104	CG6418	CG6418	CG6418	FBgn0036104
AmiGO	FBgn0032919	CG9253	CG9253	CG9253	FBgn0032919
AmiGO	FBgn0262475	bru2	bru2	CG43065	FBgn0262475
AmiGO	FBgn0086130	Dbp21E2	Dbp21E2	CG3561	FBgn0086130
AmiGO	FBgn0052423	shep	shep	CG32423	FBgn0052423
AmiGO	FBgn0015818	Spx	Spx	CG3780	FBgn0015818
AmiGO	FBgn0030631	CG6227	CG6227	CG6227	FBgn0030631
AmiGO	FBgn0031319	CG4896	CG4896	CG4896	FBgn0031319
AmiGO	FBgn0285954	caz	caz	CG3606	FBgn0285954
AmiGO	FBgn0015075	Ddx1	Ddx1	CG9054	FBgn0015075
AmiGO	FBgn0265297	pAbp	pAbp	CG5119	FBgn0265297
AmiGO	FBgn0021995	Rs1	Rs1	CG2173	FBgn0021995
AmiGO	FBgn0000114	bru1	bru1	CG31762	FBgn0000114
AmiGO	FBgn0030855	CG5800	CG5800	CG5800	FBgn0030855
AmiGO	FBgn0001942	eIF4A	eIF4A	CG9075	FBgn0001942
AmiGO	FBgn0001565	Hlc	Hlc	CG1666	FBgn0001565
AmiGO	FBgn0038953	CG18596	CG18596	CG18596	FBgn0038953
AmiGO	FBgn0031883	Caper	Caper	CG11266	FBgn0031883
AmiGO	FBgn0031318	CG4887	CG4887	CG4887	FBgn0031318
AmiGO	FBgn0052344	CG32344	CG32344	CG32344	FBgn0052344
AmiGO	FBgn0260456	CG4806	CG4806	CG4806	FBgn0260456
AmiGO	FBgn0037342	CG2931	CG2931	CG2931	FBgn0037342
AmiGO	FBgn0005411	U2af50	U2af50	CG9998	FBgn0005411
AmiGO	FBgn0037250	CG1074	CG1074	CG1074	FBgn0037250
AmiGO	FBgn0051569	tRNA	tRNA:Ala-AGC-2-5	CR31569	FBgn0051569
AmiGO	FBgn0262734	eIF4H1	eIF4H1	CG4429	FBgn0262734
AmiGO	FBgn0051570	tRNA	tRNA:Ala-AGC-2-2	CR31570	FBgn0051570
AmiGO	FBgn0051573	tRNA	tRNA:Pro-TGG-1-3	CR31573	FBgn0051573
AmiGO	FBgn0053534	tRNA	tRNA:Ala-AGC-2-4	CR33534	FBgn0053534
AmiGO	FBgn0039463	Spag1	Spag1	CG18472	FBgn0039463
AmiGO	FBgn0036775	Rpc53	Rpc53	CG5147	FBgn0036775
AmiGO	FBgn0036640	nxf2	nxf2	CG4118	FBgn0036640
AmiGO	FBgn0010422	TfIIS	TfIIS	CG3710	FBgn0010422
AmiGO	FBgn0263757	Rpb4	Rpb4	CG43662	FBgn0263757
AmiGO	FBgn0052062	Rbfox1	Rbfox1	CG32062	FBgn0052062
AmiGO	FBgn0261119	Prp19	Prp19	CG5519	FBgn0261119
AmiGO	FBgn0030687	Rpc160	Rpc160	CG17209	FBgn0030687
AmiGO	FBgn0025571	SF1	SF1	CG5836	FBgn0025571
AmiGO	FBgn0032256	RluA	RluA-2	CG6187	FBgn0032256
AmiGO	FBgn0034598	CG4266	CG4266	CG4266	FBgn0034598
AmiGO	FBgn0034572	CG9346	CG9346	CG9346	FBgn0034572
AmiGO	FBgn0086895	pea	pea	CG8241	FBgn0086895
AmiGO	FBgn0022985	qkr58E	qkr58E-2	CG5821	FBgn0022985
AmiGO	FBgn0022986	qkr58E	qkr58E-1	CG3613	FBgn0022986
AmiGO	FBgn0034740	nsr	nsr	CG3875	FBgn0034740
AmiGO	FBgn0034739	CG3927	CG3927	CG3927	FBgn0034739
AmiGO	FBgn0264491	how	how	CG10293	FBgn0264491
AmiGO	FBgn0034659	CG4021	CG4021	CG4021	FBgn0034659
AmiGO	FBgn0002774	mle	mle	CG11680	FBgn0002774
AmiGO	FBgn0051719	RluA	RluA-1	CG31719	FBgn0051719
AmiGO	FBgn0027548	nito	nito	CG2910	FBgn0027548
AmiGO	FBgn0004581	bgcn	bgcn	CG30170	FBgn0004581
AmiGO	FBgn0003559	su	su(f)	CG17170	FBgn0003559
AmiGO	FBgn0061362	CG33785	CG33785	CG33785	FBgn0061362
AmiGO	FBgn0004227	nonA	nonA	CG4211	FBgn0004227
AmiGO	FBgn0086444	l	l(2)37Cb	CG10689	FBgn0086444
AmiGO	FBgn0034731	Dmel	CG10384	CG10384	FBgn0034731
AmiGO	FBgn0032883	Rhau	Rhau	CG9323	FBgn0032883
AmiGO	FBgn0003483	spn	spn-E	CG3158	FBgn0003483
AmiGO	FBgn0032194	CG4901	CG4901	CG4901	FBgn0032194
AmiGO	FBgn0051501	nxf4	nxf4	CG31501	FBgn0051501
AmiGO	FBgn0052533	CG32533	CG32533	CG32533	FBgn0052533
AmiGO	FBgn0030833	CG8915	CG8915	CG8915	FBgn0030833
AmiGO	FBgn0003321	sbr	sbr	CG1664	FBgn0003321
AmiGO	FBgn0022984	qkr58E	qkr58E-3	CG3584	FBgn0022984
AmiGO	FBgn0263232	Nxf3	Nxf3	CG32135	FBgn0263232
AmiGO	FBgn0038903	RpI12	RpI12	CG13418	FBgn0038903
AmiGO	FBgn0033378	tsu	tsu	CG8781	FBgn0033378
AmiGO	FBgn0001330	kz	kz	CG3228	FBgn0001330
AmiGO	FBgn0033160	Dhx15	Dhx15	CG11107	FBgn0033160
AmiGO	FBgn0016977	spen	spen	CG18497	FBgn0016977
AmiGO	FBgn0030246	CG1582	CG1582	CG1582	FBgn0030246
AmiGO	FBgn0030177	CG2972	CG2972	CG2972	FBgn0030177
AmiGO	FBgn0031657	CG3756	CG3756	CG3756	FBgn0031657
AmiGO	FBgn0031631	CG3225	CG3225	CG3225	FBgn0031631
AmiGO	FBgn0015520	nonA	nonA-l	CG10328	FBgn0015520
AmiGO	FBgn0261286	Mat89Ba	Mat89Ba	CG12785	FBgn0261286
AmiGO	FBgn0026713	l	l(1)G0007	CG32604	FBgn0026713
AmiGO	FBgn0014189	Hel25E	Hel25E	CG7269	FBgn0014189
AmiGO	FBgn0004838	Hrb27C	Hrb27C	CG10377	FBgn0004838
AmiGO	FBgn0004655	wapl	wapl	CG3707	FBgn0004655
AmiGO	FBgn0263396	sqd	sqd	CG16901	FBgn0263396
AmiGO	FBgn0263486	scaRNA	scaRNA:PsiU6-40	CR43601	FBgn0263486
AmiGO	FBgn0263485	scaRNA	scaRNA:PsiU2-55	CR43600	FBgn0263485
AmiGO	FBgn0263479	scaRNA	scaRNA:PsiU2-35.45	CR43594	FBgn0263479
AmiGO	FBgn0263477	scaRNA	scaRNA:PsiU1-6	CR43592	FBgn0263477
AmiGO	FBgn0263474	scaRNA	scaRNA:PsiU2-38.40.42	CR43589	FBgn0263474
AmiGO	FBgn0263471	scaRNA	scaRNA:MeU2-48	CR43586	FBgn0263471
AmiGO	FBgn0039261	Ythdf	Ythdf	CG6422	FBgn0039261
AmiGO	FBgn0032439	Ref2	Ref2	CG17031	FBgn0032439
AmiGO	FBgn0010774	Ref1	Ref1	CG1101	FBgn0010774
AmiGO	FBgn0065057	scaRNA	scaRNA:MeU2-C28	CR33726	FBgn0065057
AmiGO	FBgn0261454	scaRNA	scaRNA:MeU4-A65	CR43571	FBgn0261454
AmiGO	FBgn0261453	scaRNA	scaRNA:MeU2-C41	CR43570	FBgn0261453
AmiGO	FBgn0029880	CG14443	CG14443	CG14443	FBgn0029880
AmiGO	FBgn0029887	CG3198	CG3198	CG3198	FBgn0029887
AmiGO	FBgn0024698	Cpsf160	Cpsf160	CG10110	FBgn0024698
AmiGO	FBgn0034829	CG9899	CG9899	CG9899	FBgn0034829
AmiGO	FBgn0029979	mahe	mahe	CG10777	FBgn0029979
AmiGO	FBgn0039117	tst	tst	CG10210	FBgn0039117
AmiGO	FBgn0267791	HnRNP	HnRNP-K	CG13425	FBgn0267791
AmiGO	FBgn0260962	pic	pic	CG7769	FBgn0260962
AmiGO	FBgn0031224	CG11454	CG11454	CG11454	FBgn0031224
AmiGO	FBgn0037549	CG7878	CG7878	CG7878	FBgn0037549
AmiGO	FBgn0036734	CG7564	CG7564	CG7564	FBgn0036734
AmiGO	FBgn0024804	Dbp80	Dbp80	CG17023	FBgn0024804
AmiGO	FBgn0051155	Rpb7	Rpb7	CG31155	FBgn0051155
AmiGO	FBgn0262737	mub	mub	CG7437	FBgn0262737
AmiGO	FBgn0002044	swm	swm	CG10084	FBgn0002044
AmiGO	FBgn0032690	CG10333	CG10333	CG10333	FBgn0032690
AmiGO	FBgn0038057	CG12267	CG12267	CG12267	FBgn0038057
AmiGO	FBgn0285926	Imp	Imp	CG1691	FBgn0285926
AmiGO	FBgn0040020	MED21	MED21	CG17397	FBgn0040020
AmiGO	FBgn0030959	CG6961	CG6961	CG6961	FBgn0030959
AmiGO	FBgn0030956	CG18259	CG18259	CG18259	FBgn0030956
AmiGO	FBgn0037573	CG7483	CG7483	CG7483	FBgn0037573
AmiGO	FBgn0035205	Ctr9	Ctr9	CG2469	FBgn0035205
AmiGO	FBgn0035162	Sf3b3	Sf3b3	CG13900	FBgn0035162
AmiGO	FBgn0003261	Rm62	Rm62	CG10279	FBgn0003261
AmiGO	FBgn0003165	pum	pum	CG9755	FBgn0003165
AmiGO	FBgn0001986	Mtr4	Mtr4	CG4152	FBgn0001986
AmiGO	FBgn0263603	Zn72D	Zn72D	CG5215	FBgn0263603
AmiGO	FBgn0263231	bel	bel	CG9748	FBgn0263231
AmiGO	FBgn0011666	msi	msi	CG5099	FBgn0011666
AmiGO	FBgn0283442	vas	vas	CG46283	FBgn0283442
AmiGO	FBgn0035720	CG10077	CG10077	CG10077	FBgn0035720
AmiGO	FBgn0015544	spag	spag	CG13570	FBgn0015544
AmiGO	FBgn0015331	abs	abs	CG14637	FBgn0015331
AmiGO	FBgn0015299	Ssb	Ssb-c31a	CG8396	FBgn0015299
AmiGO	FBgn0031764	CG9107	CG9107	CG9107	FBgn0031764
AmiGO	FBgn0037232	Suv3	Suv3	CG9791	FBgn0037232
AmiGO	FBgn0014870	Psi	Psi	CG8912	FBgn0014870
AmiGO	FBgn0041186	Slbp	Slbp	CG11886	FBgn0041186
AmiGO	FBgn0028402	Sin	Sin	CG10582	FBgn0028402
AmiGO	FBgn0014037	Su	Su(Tpl)	CG32217	FBgn0014037
AmiGO	FBgn0051591	tRNA	tRNA:Val-AAC-1-2	CR31591	FBgn0051591
AmiGO	FBgn0004587	B52	B52	CG10851	FBgn0004587
AmiGO	FBgn0005674	GluProRS	GluProRS	CG5394	FBgn0005674
AmiGO	FBgn0064117	SLIRP1	SLIRP1	CG33714	FBgn0064117
AmiGO	FBgn0037602	SLIRP2	SLIRP2	CG8021	FBgn0037602
AmiGO	FBgn0034503	MED8	MED8	CG13867	FBgn0034503
AmiGO	FBgn0262954	Rpb12	Rpb12	CG34186	FBgn0262954
AmiGO	FBgn0259982	Uxt	Uxt	CG15266	FBgn0259982
AmiGO	FBgn0034795	MED23	MED23	CG3695	FBgn0034795
AmiGO	FBgn0032512	Bdp1	Bdp1	CG9305	FBgn0032512
AmiGO	FBgn0267861	Maf1	Maf1	CG40196	FBgn0267861
AmiGO	FBgn0004419	me31B	me31B	CG4916	FBgn0004419
AmiGO	FBgn0267790	rump	rump	CG9373	FBgn0267790
AmiGO	FBgn0010750	atms	atms	CG2503	FBgn0010750
AmiGO	FBgn0036581	MED10	MED10	CG5057	FBgn0036581
AmiGO	FBgn0036496	cocoon	cocoon	CG7804	FBgn0036496
AmiGO	FBgn0036405	CG6833	CG6833	CG6833	FBgn0036405
AmiGO	FBgn0051390	MED7	MED7	CG31390	FBgn0051390
AmiGO	FBgn0032634	Rpb11	Rpb11	CG6840	FBgn0032634
AmiGO	FBgn0086447	l	l(2)37Cg	CG10685	FBgn0086447
AmiGO	FBgn0034065	Rrp42	Rrp42	CG8395	FBgn0034065
AmiGO	FBgn0259199	Snup	Snup	CG42303	FBgn0259199
AmiGO	FBgn0032822	CG10466	CG10466	CG10466	FBgn0032822
AmiGO	FBgn0039544	CG12877	CG12877	CG12877	FBgn0039544
AmiGO	FBgn0031388	CG12674	CG12674	CG12674	FBgn0031388
AmiGO	FBgn0040339	MED22	MED22	CG3034	FBgn0040339
AmiGO	FBgn0035149	MED30	MED30	CG17183	FBgn0035149
AmiGO	FBgn0035025	uri	uri	CG11416	FBgn0035025
AmiGO	FBgn0283741	prage	prage	CG42666	FBgn0283741
AmiGO	FBgn0001324	kto	kto	CG8491	FBgn0001324
AmiGO	FBgn0001276	ix	ix	CG13201	FBgn0001276
AmiGO	FBgn0038601	CG18600	CG18600	CG18600	FBgn0038601
AmiGO	FBgn0053505	U3	U3-55K	CG33505	FBgn0053505
AmiGO	FBgn0038578	MED17	MED17	CG7957	FBgn0038578
AmiGO	FBgn0025790	TBPH	TBPH	CG10327	FBgn0025790
AmiGO	FBgn0038371	Pbp45	Pbp45	CG9597	FBgn0038371
AmiGO	FBgn0035851	MED24	MED24	CG7999	FBgn0035851
AmiGO	FBgn0035754	MED4	MED4	CG8609	FBgn0035754
AmiGO	FBgn0030789	Rrp45	Rrp45	CG9606	FBgn0030789
AmiGO	FBgn0037262	MED31	MED31	CG1057	FBgn0037262
AmiGO	FBgn0026873	MED18	MED18	CG14802	FBgn0026873
AmiGO	FBgn0031535	CG12795	CG12795	CG12795	FBgn0031535
AmiGO	FBgn0034631	TAF1C	TAF1C-like	CG10496	FBgn0034631
AmiGO	FBgn0037792	TAF1B	TAF1B	CG6241	FBgn0037792
AmiGO	FBgn0039218	Rpb10	Rpb10	CG13628	FBgn0039218
AmiGO	FBgn0000617	Taf9	Taf9	CG6474	FBgn0000617
AmiGO	FBgn0033571	Rpb5	Rpb5	CG11979	FBgn0033571
AmiGO	FBgn0023527	CG3071	CG3071	CG3071	FBgn0023527
AmiGO	FBgn0085383	CG34354	CG34354	CG34354	FBgn0085383
AmiGO	FBgn0030571	CG14414	CG14414	CG14414	FBgn0030571
AmiGO	FBgn0039730	CG7903	CG7903	CG7903	FBgn0039730
AmiGO	FBgn0031062	CG14230	CG14230	CG14230	FBgn0031062
AmiGO	FBgn0039659	CG14506	CG14506	CG14506	FBgn0039659
AmiGO	FBgn0032620	CG12288	CG12288	CG12288	FBgn0032620
AmiGO	FBgn0040365	CG14628	CG14628	CG14628	FBgn0040365
AmiGO	FBgn0035526	CG1316	CG1316	CG1316	FBgn0035526
AmiGO	FBgn0033475	CG12129	CG12129	CG12129	FBgn0033475
AmiGO	FBgn0033351	AIMP1	AIMP1	CG8235	FBgn0033351
AmiGO	FBgn0038640	Dmel	CG7706	CG7706	FBgn0038640
AmiGO	FBgn0036889	CG14100	CG14100	CG14100	FBgn0036889
AmiGO	FBgn0036838	CG3808	CG3808	CG3808	FBgn0036838
AmiGO	FBgn0051703	tplus3b	tplus3b	CG31703	FBgn0051703
AmiGO	FBgn0051702	tplus3a	tplus3a	CG31702	FBgn0051702
AmiGO	FBgn0035323	CG13807	CG13807	CG13807	FBgn0035323
AmiGO	FBgn0262401	mir	mir-285	CR42941	FBgn0262401
AmiGO	FBgn0029666	rop	CG10803	CG10803	FBgn0029666
AmiGO	FBgn0264962	Pcf11	Pcf11	CG10228	FBgn0264962
AmiGO	FBgn0015949	hrg	hrg	CG9854	FBgn0015949
AmiGO	FBgn0030251	CG2145	CG2145	CG2145	FBgn0030251
AmiGO	FBgn0010287	Trf	Trf	CG7562	FBgn0010287
AmiGO	FBgn0032688	CG15160	CG15160	CG15160	FBgn0032688
AmiGO	FBgn0035318	Dmel	CG9018	CG9018	FBgn0035318
AmiGO	FBgn0022943	Cbp20	Cbp20	CG12357	FBgn0022943
AmiGO	FBgn0024360	MTPAP	MTPAP	CG11418	FBgn0024360
AmiGO	FBgn0033865	CG6220	CG6220	CG6220	FBgn0033865
AmiGO	FBgn0019637	Atu	Atu	CG1433	FBgn0019637
AmiGO	FBgn0022942	Cbp80	Cbp80	CG7035	FBgn0022942
AmiGO	FBgn0038773	CG10887	CG10887	CG10887	FBgn0038773
AmiGO	FBgn0024285	Srp54	Srp54	CG4602	FBgn0024285
AmiGO	FBgn0032847	Taf13	Taf13	CG10756	FBgn0032847
AmiGO	FBgn0032016	Mettl14	Mettl14	CG7818	FBgn0032016
AmiGO	FBgn0003687	Tbp	Tbp	CG9874	FBgn0003687
AmiGO	FBgn0011305	Rsf1	Rsf1	CG5655	FBgn0011305
AmiGO	FBgn0028554	x16	x16	CG10203	FBgn0028554
AmiGO	FBgn0030479	Rbp1	Rbp1-like	CG1987	FBgn0030479
AmiGO	FBgn0265298	SC35	SC35	CG5442	FBgn0265298
AmiGO	FBgn0035271	CG2021	CG2021	CG2021	FBgn0035271
AmiGO	FBgn0031822	Phf5a	Phf5a	CG9548	FBgn0031822
AmiGO	FBgn0003638	su	su(w[a])	CG3019	FBgn0003638
AmiGO	FBgn0086707	ncm	ncm	CG12750	FBgn0086707
AmiGO	FBgn0031287	CG4291	CG4291	CG4291	FBgn0031287
AmiGO	FBgn0031229	CG3436	CG3436	CG3436	FBgn0031229
AmiGO	FBgn0051368	CG31368	CG31368	CG31368	FBgn0051368
AmiGO	FBgn0036386	CG8833	CG8833	CG8833	FBgn0036386
AmiGO	FBgn0024998	CG2685	CG2685	CG2685	FBgn0024998
AmiGO	FBgn0039210	CG13625	CG13625	CG13625	FBgn0039210
AmiGO	FBgn0035675	CG6610	CG6610	CG6610	FBgn0035675
AmiGO	FBgn0040235	c12	c12.1	CG12135	FBgn0040235
AmiGO	FBgn0033556	CG12343	CG12343	CG12343	FBgn0033556
AmiGO	FBgn0265184	CG44249	CG44249	CG44249	FBgn0265184
AmiGO	FBgn0038927	CG6015	CG6015	CG6015	FBgn0038927
AmiGO	FBgn0043455	CG5986	CG5986	CG5986	FBgn0043455
AmiGO	FBgn0031987	CG12375	CG12375	CG12375	FBgn0031987
AmiGO	FBgn0031607	Secp43	Secp43	CG15440	FBgn0031607
AmiGO	FBgn0031492	Prp40	Prp40	CG3542	FBgn0031492
AmiGO	FBgn0051550	CG31550	CG31550	CG31550	FBgn0051550
AmiGO	FBgn0010421	TfIIFbeta	TfIIFbeta	CG6538	FBgn0010421
AmiGO	FBgn0038950	CG5382	CG5382	CG5382	FBgn0038950
AmiGO	FBgn0038887	CG7907	CG7907	CG7907	FBgn0038887
AmiGO	FBgn0011289	TfIIA	TfIIA-L	CG5930	FBgn0011289
AmiGO	FBgn0039229	Saf	Saf-B	CG6995	FBgn0039229
AmiGO	FBgn0017457	U2af38	U2af38	CG3582	FBgn0017457
AmiGO	FBgn0027616	Ythdc1	Ythdc1	CG12076	FBgn0027616
AmiGO	FBgn0031227	CG3709	CG3709	CG3709	FBgn0031227
AmiGO	FBgn0031189	trmt10a	CG14618	CG14618	FBgn0031189
AmiGO	FBgn0004401	Pep	Pep	CG6143	FBgn0004401
AmiGO	FBgn0022724	Taf8	Taf8	CG7128	FBgn0022724
AmiGO	FBgn0032988	Tif	Tif-IA	CG3278	FBgn0032988
AmiGO	FBgn0262433	mir	mir-210	CR42991	FBgn0262433
AmiGO	FBgn0035532	CG15014	CG15014	CG15014	FBgn0035532
AmiGO	FBgn0283477	SF2	SF2	CG6987	FBgn0283477
AmiGO	FBgn0033060	CG7849	CG7849	CG7849	FBgn0033060
AmiGO	FBgn0031623	Taf12L	Taf12L	CG15632	FBgn0031623
AmiGO	FBgn0083976	CG34140	CG34140	CG34140	FBgn0083976
AmiGO	FBgn0037200	CG11109	CG11109	CG11109	FBgn0037200
AmiGO	FBgn0034351	rswl	rswl	CG5190	FBgn0034351
AmiGO	FBgn0039165	Dmel	CG6204	CG6204	FBgn0039165
AmiGO	FBgn0015828	TfIIEalpha	TfIIEalpha	CG10415	FBgn0015828
AmiGO	FBgn0040338	TfIIA	TfIIA-S-2	CG11639	FBgn0040338
AmiGO	FBgn0037540	Pbp95	Pbp95	CG2702	FBgn0037540
AmiGO	FBgn0013347	TfIIA	TfIIA-S	CG5163	FBgn0013347
AmiGO	FBgn0265574	Cdc5	Cdc5	CG6905	FBgn0265574
AmiGO	FBgn0260398	Pbp49	Pbp49	CG42515	FBgn0260398
AmiGO	FBgn0026262	Taf3	Taf3	CG2009	FBgn0026262
AmiGO	FBgn0039846	PNPase	PNPase	CG11337	FBgn0039846
AmiGO	FBgn0010282	TfIIFalpha	TfIIFalpha	CG10281	FBgn0010282
AmiGO	FBgn0011291	Taf11	Taf11	CG4079	FBgn0011291
AmiGO	FBgn0031252	CG13690	CG13690	CG13690	FBgn0031252
AmiGO	FBgn0039977	CG17454	CG17454	CG17454	FBgn0039977
AmiGO	FBgn0029693	CG6379	CG6379	CG6379	FBgn0029693
AmiGO	FBgn0036018	CG3335	CG3335	CG3335	FBgn0036018
AmiGO	FBgn0002780	mod	mod	CG2050	FBgn0002780
AmiGO	FBgn0061361	CG33786	CG33786	CG33786	FBgn0061361
AmiGO	FBgn0028474	CG4119	CG4119	CG4119	FBgn0028474
AmiGO	FBgn0263829	CG34334	CG34334	CG34334	FBgn0263829
AmiGO	FBgn0038345	CG5213	CG5213	CG5213	FBgn0038345
AmiGO	FBgn0030373	moon	moon	CG12721	FBgn0030373
AmiGO	FBgn0261065	Cpsf73	Cpsf73	CG7698	FBgn0261065
AmiGO	FBgn0037369	CG2100	CG2100	CG2100	FBgn0037369
AmiGO	FBgn0039182	CG5728	CG5728	CG5728	FBgn0039182
AmiGO	FBgn0035235	CG7879	CG7879	CG7879	FBgn0035235
AmiGO	FBgn0010280	Taf4	Taf4	CG5444	FBgn0010280
AmiGO	FBgn0039808	CG12071	CG12071	CG12071	FBgn0039808
AmiGO	FBgn0036184	PCID2	PCID2	CG7351	FBgn0036184
AmiGO	FBgn0038626	CG7691	CG7691	CG7691	FBgn0038626
AmiGO	FBgn0037330	mRpL44	mRpL44	CG2109	FBgn0037330
AmiGO	FBgn0037202	Ssl1	Ssl1	CG11115	FBgn0037202
AmiGO	FBgn0037255	Fip1	Fip1	CG1078	FBgn0037255
AmiGO	FBgn0024542	Neos	Neos	CG8614	FBgn0024542
AmiGO	FBgn0259742	CG3579	CG42360	CG42360	FBgn0259742
AmiGO	FBgn0037882	CG17187	CG17187	CG17187	FBgn0037882
AmiGO	FBgn0029941	CG1677	CG1677	CG1677	FBgn0029941
AmiGO	FBgn0283659	THG	THG	CG4103	FBgn0283659
AmiGO	FBgn0038769	Regnase	Regnase-1	CG10889	FBgn0038769
AmiGO	FBgn0031951	r2d2	r2d2	CG7138	FBgn0031951
AmiGO	FBgn0035987	Cpsf5	Cpsf5	CG3689	FBgn0035987
AmiGO	FBgn0037061	CG12975	CG12975	CG12975	FBgn0037061
AmiGO	FBgn0051922	CG31922	CG31922	CG31922	FBgn0051922
AmiGO	FBgn0028996	onecut	onecut	CG1922	FBgn0028996
AmiGO	FBgn0050011	gem	gem	CG30011	FBgn0050011
AmiGO	FBgn0032707	CG10348	CG10348	CG10348	FBgn0032707
AmiGO	FBgn0032924	Nbr	Nbr	CG9247	FBgn0032924
AmiGO	FBgn0039078	CG4374	CG4374	CG4374	FBgn0039078
AmiGO	FBgn0026324	Taf10b	Taf10b	CG3069	FBgn0026324
AmiGO	FBgn0041103	nht	nht	CG15259	FBgn0041103
AmiGO	FBgn0033252	CG12769	CG12769	CG12769	FBgn0033252
AmiGO	FBgn0033491	CG18011	CG18011	CG18011	FBgn0033491
AmiGO	FBgn0033186	CG1602	CG1602	CG1602	FBgn0033186
AmiGO	FBgn0037081	barc	barc	CG6049	FBgn0037081
AmiGO	FBgn0261552	ps	ps	CG42670	FBgn0261552
AmiGO	FBgn0085212	CG34183	CG34183	CG34183	FBgn0085212
AmiGO	FBgn0028683	spt4	spt4	CG12372	FBgn0028683
AmiGO	FBgn0011836	Taf2	Taf2	CG6711	FBgn0011836
AmiGO	FBgn0027617	CG5808	CG5808	CG5808	FBgn0027617
AmiGO	FBgn0010416	TH1	TH1	CG9984	FBgn0010416
AmiGO	FBgn0038872	Nelf	Nelf-A	CG5874	FBgn0038872
AmiGO	FBgn0040273	Spt5	Spt5	CG7626	FBgn0040273
AmiGO	FBgn0029714	CG3527	CG3527	CG3527	FBgn0029714
AmiGO	FBgn0039943	CG17168	CG17168	CG17168	FBgn0039943
AmiGO	FBgn0034748	CG17807	CG17807	CG17807	FBgn0034748
AmiGO	FBgn0034735	Dmel	CG4610	CG4610	FBgn0034735
AmiGO	FBgn0032430	CG6388	CG6388	CG6388	FBgn0032430
AmiGO	FBgn0026079	Nsun2	Nsun2	CG6133	FBgn0026079
AmiGO	FBgn0039626	Slu7	Slu7	CG1420	FBgn0039626
AmiGO	FBgn0259146	fid	fid	CG42261	FBgn0259146
AmiGO	FBgn0051812	Tsen2	Tsen2	CG31812	FBgn0051812
AmiGO	FBgn0035571	CG12493	CG12493	CG12493	FBgn0035571
AmiGO	FBgn0033741	CG8545	CG8545	CG8545	FBgn0033741
AmiGO	FBgn0023171	rnh1	rnh1	CG8729	FBgn0023171
AmiGO	FBgn0283652	Rpp30	Rpp30	CG11606	FBgn0283652
AmiGO	FBgn0033092	Rpp25	Rpp25	CG9422	FBgn0033092
AmiGO	FBgn0053260	Tsen34	Tsen34	CG33260	FBgn0053260
AmiGO	FBgn0082933	snoRNA	snoRNA:Me28S-G1083c	CR34564	FBgn0082933
AmiGO	FBgn0037466	CG1965	CG1965	CG1965	FBgn0037466
AmiGO	FBgn0082935	snoRNA	snoRNA:Me28S-G1083a	CR34562	FBgn0082935
AmiGO	FBgn0082934	snoRNA	snoRNA:Me28S-G1083b	CR34563	FBgn0082934
AmiGO	FBgn0082932	snoRNA	snoRNA:Me28S-G1083d	CR34565	FBgn0082932
AmiGO	FBgn0085391	trv	trv	CG34362	FBgn0085391
AmiGO	FBgn0037344	CG2926	CG2926	CG2926	FBgn0037344
AmiGO	FBgn0037531	CG10445	CG10445	CG10445	FBgn0037531
AmiGO	FBgn0263072	CG43347	CG43347	CG43347	FBgn0263072
AmiGO	FBgn0039488	CG6066	CG6066	CG6066	FBgn0039488
AmiGO	FBgn0004915	TfIIB	TfIIB	CG5193	FBgn0004915
AmiGO	FBgn0036522	Phs	Phs	CG7372	FBgn0036522
AmiGO	FBgn0032815	CG10462	CG10462	CG10462	FBgn0032815
AmiGO	FBgn0030005	CG2120	CG2120	CG2120	FBgn0030005
AmiGO	FBgn0033450	Lsm11	Lsm11	CG12924	FBgn0033450
AmiGO	FBgn0034534	maf	maf-S	CG9954	FBgn0034534
AmiGO	FBgn0035145	MED14	MED14	CG12031	FBgn0035145
AmiGO	FBgn0035900	ZC3H3	ZC3H3	CG6694	FBgn0035900
AmiGO	FBgn0039861	pasha	pasha	CG1800	FBgn0039861
AmiGO	FBgn0017430	Nelf	Nelf-E	CG5994	FBgn0017430
AmiGO	FBgn0027553	NELF	NELF-B	CG32721	FBgn0027553
AmiGO	FBgn0036450	Tdrd3	Tdrd3	CG13472	FBgn0036450
AmiGO	FBgn0036531	Dmel	CG6244	CG6244	FBgn0036531
AmiGO	FBgn0260771	Larp7	Larp7	CG42569	FBgn0260771
AmiGO	FBgn0035213	CG2199	CG2199	CG2199	FBgn0035213
AmiGO	FBgn0033062	Ars2	Ars2	CG7843	FBgn0033062
AmiGO	FBgn0035901	Pus7	Pus7	CG6745	FBgn0035901
AmiGO	FBgn0063670	CG40228	CG40228	CG40228	FBgn0063670
AmiGO	FBgn0036179	CG7368	CG7368	CG7368	FBgn0036179
AmiGO	FBgn0035687	Prdm13	Prdm13	CG13296	FBgn0035687
AmiGO	FBgn0038046	CG5641	CG5641	CG5641	FBgn0038046
AmiGO	FBgn0032515	loqs	loqs	CG6866	FBgn0032515
AmiGO	FBgn0261793	Trf2	Trf2	CG18009	FBgn0261793
AmiGO	FBgn0052767	CG32767	CG32767	CG32767	FBgn0052767
AmiGO	FBgn0034246	Dcr	Dcr-2	CG6493	FBgn0034246
AmiGO	FBgn0087035	AGO2	AGO2	CG7439	FBgn0087035
AmiGO	FBgn0038811	Pus1	Pus1	CG4159	FBgn0038811
AmiGO	FBgn0029715	CG11444	CG11444	CG11444	FBgn0029715
AmiGO	FBgn0024183	vig	vig	CG4170	FBgn0024183
AmiGO	FBgn0022987	qkr54B	qkr54B	CG4816	FBgn0022987
AmiGO	FBgn0086675	fne	fne	CG4396	FBgn0086675
AmiGO	FBgn0032750	CG10495	CG10495	CG10495	FBgn0032750
AmiGO	FBgn0014342	mia	mia	CG10390	FBgn0014342
AmiGO	FBgn0034703	CG3045	CG3045	CG3045	FBgn0034703
AmiGO	FBgn0039115	CG10214	CG10214	CG10214	FBgn0039115
AmiGO	FBgn0037926	Elp1	Elp1	CG10535	FBgn0037926
AmiGO	FBgn0037924	Dmel	CG14712	CG14712	FBgn0037924
AmiGO	FBgn0031238	CG3645	CG3645	CG3645	FBgn0031238
AmiGO	FBgn0032819	CG10463	CG10463	CG10463	FBgn0032819
AmiGO	FBgn0032793	CG10189	CG10189	CG10189	FBgn0032793
AmiGO	FBgn0035591	CG4611	CG4611	CG4611	FBgn0035591
AmiGO	FBgn0262459	mir	mir-34	CR43033	FBgn0262459
AmiGO	FBgn0032115	CG4438	CG4438	CG4438	FBgn0032115
AmiGO	FBgn0036624	RAF2	RAF2	CG4877	FBgn0036624
AmiGO	FBgn0010417	Taf6	Taf6	CG32211	FBgn0010417
AmiGO	FBgn0043799	CG31381	CG31381	CG31381	FBgn0043799
AmiGO	FBgn0033375	CG8078	CG8078	CG8078	FBgn0033375
AmiGO	FBgn0015359	CG2034	CG2034	CG2034	FBgn0015359
AmiGO	FBgn0038327	Trax	Trax	CG5063	FBgn0038327
AmiGO	FBgn0030554	CG1434	CG1434	CG1434	FBgn0030554
AmiGO	FBgn0286204	ich	ich	CG11966	FBgn0286204
AmiGO	FBgn0262732	mbf1	mbf1	CG4143	FBgn0262732
AmiGO	FBgn0029094	asf1	asf1	CG9383	FBgn0029094
AmiGO	FBgn0011290	Taf12	Taf12	CG17358	FBgn0011290
AmiGO	FBgn0262160	CG9932	CG9932	CG9932	FBgn0262160
AmiGO	FBgn0263144	bin3	bin3	CG8276	FBgn0263144
AmiGO	FBgn0029822	CG12236	CG12236	CG12236	FBgn0029822
AmiGO	FBgn0039946	ATbp	ATbp	CG17172	FBgn0039946
AmiGO	FBgn0086451	l	l(2)k09022	CG10805	FBgn0086451
AmiGO	FBgn0032817	CG10631	CG10631	CG10631	FBgn0032817
AmiGO	FBgn0030085	CG6999	CG6999	CG6999	FBgn0030085
AmiGO	FBgn0035370	Non2	Non2	CG1240	FBgn0035370
AmiGO	FBgn0037794	CG6254	CG6254	CG6254	FBgn0037794
AmiGO	FBgn0037220	CG14641	CG14641	CG14641	FBgn0037220
AmiGO	FBgn0030801	Rcp	Rcp	CG4875	FBgn0030801
AmiGO	FBgn0036277	CG10418	CG10418	CG10418	FBgn0036277
AmiGO	FBgn0038090	Dmel	CG10909	CG10909	FBgn0038090
AmiGO	FBgn0036828	CG6841	CG6841	CG6841	FBgn0036828
AmiGO	FBgn0003062	Fib	Fib	CG9888	FBgn0003062
AmiGO	FBgn0261792	snRNP	snRNP-U1-C	CG5454	FBgn0261792
AmiGO	FBgn0035831	Pop4	Pop4	CG8038	FBgn0035831
AmiGO	FBgn0038344	obe	obe	CG5205	FBgn0038344
AmiGO	FBgn0266917	Sf3a1	Sf3a1	CG16941	FBgn0266917
AmiGO	FBgn0039920	CG11360	CG11360	CG11360	FBgn0039920
AmiGO	FBgn0085405	CG34376	CG34376	CG34376	FBgn0085405
AmiGO	FBgn0082831	pps	pps	CG6525	FBgn0082831
AmiGO	FBgn0035872	Cpsf6	Cpsf6	CG7185	FBgn0035872
AmiGO	FBgn0028993	scro	scro	CG17594	FBgn0287186
AmiGO	FBgn0038550	CG17801	CG17801	CG17801	FBgn0038550
AmiGO	FBgn0038833	Dmel	CG15696	CG15696	FBgn0038833
AmiGO	FBgn0021895	ytr	ytr	CG18426	FBgn0021895
AmiGO	FBgn0034564	CG9344	CG9344	CG9344	FBgn0034564
AmiGO	FBgn0034425	CG11906	CG11906	CG11906	FBgn0034425
AmiGO	FBgn0029711	Usf	Usf	CG17592	FBgn0029711
AmiGO	FBgn0039860	CG1792	CG1792	CG1792	FBgn0039860
AmiGO	FBgn0039831	CG12054	CG12054	CG12054	FBgn0039831
AmiGO	FBgn0034838	CG12782	CG12782	CG12782	FBgn0034838
AmiGO	FBgn0014366	noi	noi	CG2925	FBgn0014366
AmiGO	FBgn0004054	zen2	zen2	CG1048	FBgn0004054
AmiGO	FBgn0024321	NK7	NK7.1	CG8524	FBgn0024321
AmiGO	FBgn0027841	CstF64	CstF64	CG7697	FBgn0027841
AmiGO	FBgn0042696	NfI	NfI	CG2380	FBgn0042696
AmiGO	FBgn0267792	rgr	rgr	CG8643	FBgn0267792
AmiGO	FBgn0032393	Nfs1	Nfs1	CG12264	FBgn0032393
AmiGO	FBgn0032388	CG6686	CG6686	CG6686	FBgn0032388
AmiGO	FBgn0020912	Ptx1	Ptx1	CG1447	FBgn0020912
AmiGO	FBgn0000426	SmF	SmF	CG16792	FBgn0000426
AmiGO	FBgn0052772	CG32772	CG32772	CG32772	FBgn0052772
AmiGO	FBgn0031266	Sf3b1	Sf3b1	CG2807	FBgn0031266
AmiGO	FBgn0037550	CG9667	CG9667	CG9667	FBgn0037550
AmiGO	FBgn0036733	U4	U4-U6-60K	CG6322	FBgn0036733
AmiGO	FBgn0010406	RNaseX25	RNaseX25	CG8194	FBgn0010406
AmiGO	FBgn0031114	cactin	cactin	CG1676	FBgn0031114
AmiGO	FBgn0266441	CG45071	CG45071	CG45071	FBgn0266441
AmiGO	FBgn0031051	Ranbp21	Ranbp21	CG12234	FBgn0031051
AmiGO	FBgn0014949	btn	btn	CG5264	FBgn0014949
AmiGO	FBgn0036487	Prp31	Prp31	CG6876	FBgn0036487
AmiGO	FBgn0051365	CG31365	CG31365	CG31365	FBgn0051365
AmiGO	FBgn0036349	SNCF	SNCF	CG14112	FBgn0036349
AmiGO	FBgn0027873	Cpsf100	Cpsf100	CG1957	FBgn0027873
AmiGO	FBgn0022361	Pur	Pur-alpha	CG1507	FBgn0022361
AmiGO	FBgn0039355	CG4730	CG4730	CG4730	FBgn0039355
AmiGO	FBgn0038592	Dmel	CG18599	CG18599	FBgn0038592
AmiGO	FBgn0034096	CG7786	CG7786	CG7786	FBgn0034096
AmiGO	FBgn0022699	D19B	D19B	CG10270	FBgn0022699
AmiGO	FBgn0032814	CG10366	CG10366	CG10366	FBgn0032814
AmiGO	FBgn0031628	CG3294	CG3294	CG3294	FBgn0031628
AmiGO	FBgn0005642	wdn	wdn	CG1454	FBgn0005642
AmiGO	FBgn0031232	CG11617	CG11617	CG11617	FBgn0031232
AmiGO	FBgn0038047	CG5245	CG5245	CG5245	FBgn0038047
AmiGO	FBgn0030799	CG4872	CG4872	CG4872	FBgn0030799
AmiGO	FBgn0036856	CG9666	CG9666	CG9666	FBgn0036856
AmiGO	FBgn0285971	prg	prg	CG9233	FBgn0285971
AmiGO	FBgn0035692	Sf3b6	Sf3b6	CG13298	FBgn0035692
AmiGO	FBgn0035691	CG7386	CG7386	CG7386	FBgn0035691
AmiGO	FBgn0035690	CG10274	CG10274	CG10274	FBgn0035690
AmiGO	FBgn0015025	CkIIalpha	CkIIalpha-i1	CG6215	FBgn0015025
AmiGO	FBgn0027525	LTV1	LTV1	CG7686	FBgn0027525
AmiGO	FBgn0037746	CG8478	CG8478	CG8478	FBgn0037746
AmiGO	FBgn0037717	CG8301	CG8301	CG8301	FBgn0037717
AmiGO	FBgn0037713	CG16790	CG16790	CG16790	FBgn0037713
AmiGO	FBgn0032197	ova	ova	CG5694	FBgn0032197
AmiGO	FBgn0032169	CG4709	CG4709	CG4709	FBgn0032169
AmiGO	FBgn0032150	CG13123	CG13123	CG13123	FBgn0032150
AmiGO	FBgn0037619	CG8159	CG8159	CG8159	FBgn0037619
AmiGO	FBgn0042205	CG18764	CG18764	CG18764	FBgn0042205
AmiGO	FBgn0035144	Kah	Kah	CG17181	FBgn0035144
AmiGO	FBgn0033994	CG7544	CG7544	CG7544	FBgn0033994
AmiGO	FBgn0033948	CG12863	CG12863	CG12863	FBgn0033948
AmiGO	FBgn0033934	CG17385	CG17385	CG17385	FBgn0033934
AmiGO	FBgn0022935	D19A	D19A	CG10269	FBgn0022935
AmiGO	FBgn0001981	esg	esg	CG3758	FBgn0287768
AmiGO	FBgn0028658	Adat1	Adat1	CG16889	FBgn0028658
AmiGO	FBgn0261933	SmD1	SmD1	CG10753	FBgn0261933
AmiGO	FBgn0038766	CG4854	CG4854	CG4854	FBgn0038766
AmiGO	FBgn0033185	CG1603	CG1603	CG1603	FBgn0033185
AmiGO	FBgn0261791	SNRPG	SNRPG	CG9742	FBgn0261791
AmiGO	FBgn0261789	SmD2	SmD2	CG1249	FBgn0261789
AmiGO	FBgn0028382	cyp33	cyp33	CG4886	FBgn0028382
AmiGO	FBgn0261679	CG42726	CG42726	CG42726	FBgn0261679
AmiGO	FBgn0030417	Dmel	CG15725	CG15725	FBgn0030417
AmiGO	FBgn0037031	CG11456	CG11456	CG11456	FBgn0037031
AmiGO	FBgn0025635	CG17829	CG17829	CG17829	FBgn0025635
AmiGO	FBgn0030240	CG2202	CG2202	CG2202	FBgn0030240
AmiGO	FBgn0030207	Dmel	CG2887	CG2887	FBgn0030207
AmiGO	FBgn0038549	CG17802	CG17802	CG17802	FBgn0038549
AmiGO	FBgn0025456	CREG	CREG	CG5413	FBgn0025456
AmiGO	FBgn0015393	hoip	hoip	CG3949	FBgn0286786
AmiGO	FBgn0011277	HLH4C	HLH4C	CG3052	FBgn0011277
AmiGO	FBgn0011276	HLH3B	HLH3B	CG2655	FBgn0011276
AmiGO	FBgn0030408	Dmel	CG11085	CG11085	FBgn0030408
AmiGO	FBgn0053213	CG33213	CG33213	CG33213	FBgn0053213
AmiGO	FBgn0031573	CG3407	CG3407	CG3407	FBgn0031573
AmiGO	FBgn0031493	Sf3b2	Sf3b2	CG3605	FBgn0031493
AmiGO	FBgn0031322	Dmel	CG5001	CG5001	FBgn0031322
AmiGO	FBgn0015621	Clp	Clp	CG3642	FBgn0015621
AmiGO	FBgn0033210	U2A	U2A	CG1406	FBgn0033210
AmiGO	FBgn0032694	MESR3	MESR3	CG15162	FBgn0032694
AmiGO	FBgn0023441	fus	fus	CG8205	FBgn0023441
AmiGO	FBgn0034599	hng1	hng1	CG9437	FBgn0034599
AmiGO	FBgn0029824	CG3726	CG3726	CG3726	FBgn0029824
AmiGO	FBgn0039565	Dmel	CG4884	CG4884	FBgn0039565
AmiGO	FBgn0036423	CG3919	CG3919	CG3919	FBgn0036423
AmiGO	FBgn0264817	pre	pre-lola-G	CG44025	FBgn0264817
AmiGO	FBgn0030664	CG8119	CG8119	CG8119	FBgn0030664
AmiGO	FBgn0031391	CG11723	CG11723	CG11723	FBgn0031391
AmiGO	FBgn0035405	CG15812	CG15812	CG15812	FBgn0035405
AmiGO	FBgn0032130	brwl	brwl	CG3838	FBgn0032130
AmiGO	FBgn0037634	hng2	hng2	CG8359	FBgn0037634
AmiGO	FBgn0028931	CG16863	CG16863	CG16863	FBgn0028931
AmiGO	FBgn0263108	BtbVII	BtbVII	CG43365	FBgn0263108
AmiGO	FBgn0035903	CG6765	CG6765	CG6765	FBgn0035903
AmiGO	FBgn0031947	Dmel	CG7154	CG7154	FBgn0031947
AmiGO	FBgn0038316	CG6276	CG6276	CG6276	FBgn0038316
AmiGO	FBgn0030432	CG4404	CG4404	CG4404	FBgn0030432
AmiGO	FBgn0052121	CG32121	CG32121	CG32121	FBgn0052121
AmiGO	FBgn0030710	CG8924	CG8924	CG8924	FBgn0030710
AmiGO	FBgn0031281	Saf6	Saf6	CG3883	FBgn0031281
AmiGO	FBgn0026722	drosha	drosha	CG8730	FBgn0026722
AmiGO	FBgn0261109	mrn	mrn	CG7764	FBgn0261109
AmiGO	FBgn0038269	Rrp6	Rrp6	CG7292	FBgn0038269
AmiGO	FBgn0032223	GATAd	GATAd	CG5034	FBgn0032223
AmiGO	FBgn0039039	lmd	lmd	CG4677	FBgn0039039
AmiGO	FBgn0040318	HGTX	HGTX	CG13475	FBgn0040318
AmiGO	FBgn0035608	blanks	blanks	CG10630	FBgn0035608
AmiGO	FBgn0033782	sug	sug	CG3850	FBgn0033782
AmiGO	FBgn0261930	vnd	vnd	CG6172	FBgn0261930
AmiGO	FBgn0028684	Rpt5	Rpt5	CG10370	FBgn0028684
AmiGO	FBgn0038390	Rbf2	Rbf2	CG5083	FBgn0038390
AmiGO	FBgn0037657	hyx	hyx	CG11990	FBgn0037657
AmiGO	FBgn0021872	Xbp1	Xbp1	CG9415	FBgn0021872
AmiGO	FBgn0002631	E	E(spl)m5-HLH	CG6096	FBgn0002631
AmiGO	FBgn0002633	E	E(spl)m7-HLH	CG8361	FBgn0002633
AmiGO	FBgn0061200	Nup153	Nup153	CG4453	FBgn0061200
AmiGO	FBgn0017578	Max	Max	CG9648	FBgn0017578
AmiGO	FBgn0037931	CG18476	CG18476	CG18476	FBgn0037931
AmiGO	FBgn0037920	CG14710	CG14710	CG14710	FBgn0037920
AmiGO	FBgn0037877	CG6689	CG6689	CG6689	FBgn0037877
AmiGO	FBgn0037876	CG4820	CG4820	CG4820	FBgn0037876
AmiGO	FBgn0032295	CG12299	CG12299	CG12299	FBgn0032295
AmiGO	FBgn0004394	pdm2	pdm2	CG12287	FBgn0004394
AmiGO	FBgn0031144	CG1529	CG1529	CG1529	FBgn0031144
AmiGO	FBgn0286809	xmas	xmas	CG46386	FBgn0286809
AmiGO	FBgn0051388	CG31388	CG31388	CG31388	FBgn0051388
AmiGO	FBgn0051224	CG31224	CG31224	CG31224	FBgn0051224
AmiGO	FBgn0039329	CG10669	CG10669	CG10669	FBgn0039329
AmiGO	FBgn0039683	dmrt99B	dmrt99B	CG15504	FBgn0039683
AmiGO	FBgn0005648	Pabp2	Pabp2	CG2163	FBgn0005648
AmiGO	FBgn0040366	CG11398	CG11398	CG11398	FBgn0040366
AmiGO	FBgn0003742	tra2	tra2	CG10128	FBgn0003742
AmiGO	FBgn0030010	CG10959	CG10959	CG10959	FBgn0030010
AmiGO	FBgn0030008	CG2129	CG2129	CG2129	FBgn0030008
AmiGO	FBgn0028895	CG17328	CG17328	CG17328	FBgn0028895
AmiGO	FBgn0035481	CG12605	CG12605	CG12605	FBgn0035481
AmiGO	FBgn0033581	CG12391	CG12391	CG12391	FBgn0033581
AmiGO	FBgn0027514	CG1024	CG1024	CG1024	FBgn0027514
AmiGO	FBgn0261705	CG42741	CG42741	CG42741	FBgn0261705
AmiGO	FBgn0035137	CG1233	CG1233	CG1233	FBgn0035137
AmiGO	FBgn0263772	CG43689	CG43689	CG43689	FBgn0263772
AmiGO	FBgn0263599	l	l(3)72Ab	CG5931	FBgn0263599
AmiGO	FBgn0033749	achi	achi	CG8819	FBgn0033749
AmiGO	FBgn0033748	vis	vis	CG8821	FBgn0033748
AmiGO	FBgn0028878	CG15269	CG15269	CG15269	FBgn0028878
AmiGO	FBgn0033449	CG1663	CG1663	CG1663	FBgn0033449
AmiGO	FBgn0038851	dmrt93B	dmrt93B	CG5737	FBgn0038851
AmiGO	FBgn0001341	Mybbp1A	Mybbp1A	CG6189	FBgn0001341
AmiGO	FBgn0038787	CG4360	CG4360	CG4360	FBgn0038787
AmiGO	FBgn0033169	CG11123	CG11123	CG11123	FBgn0033169
AmiGO	FBgn0016978	snRNP	snRNP-U1-70K	CG8749	FBgn0016978
AmiGO	FBgn0030477	dmrt11E	dmrt11E	CG15749	FBgn0030477
AmiGO	FBgn0037120	CG11247	CG11247	CG11247	FBgn0037120
AmiGO	FBgn0038548	CG17806	CG17806	CG17806	FBgn0038548
AmiGO	FBgn0031610	CG15436	CG15436	CG15436	FBgn0031610
AmiGO	FBgn0016694	Pdp1	Pdp1	CG17888	FBgn0016694
AmiGO	FBgn0038244	CG7987	CG7987	CG7987	FBgn0038244
AmiGO	FBgn0037275	CG14655	CG14655	CG14655	FBgn0037275
AmiGO	FBgn0003411	sisA	sisA	CG1641	FBgn0003411
AmiGO	FBgn0264005	Hmx	Hmx	CG43748	FBgn0264005
AmiGO	FBgn0024491	Bin1	Bin1	CG6046	FBgn0024491
AmiGO	FBgn0039260	Smg6	Smg6	CG6369	FBgn0039260
AmiGO	FBgn0037937	Fer3	Fer3	CG6913	FBgn0037937
AmiGO	FBgn0030680	CG8944	CG8944	CG8944	FBgn0030680
AmiGO	FBgn0003575	su	su(sable)	CG6222	FBgn0003575
AmiGO	FBgn0035153	ebd1	ebd1	CG3371	FBgn0035153
AmiGO	FBgn0050020	CG30020	CG30020	CG30020	FBgn0050020
AmiGO	FBgn0033834	Dmel	CG4744	CG4744	FBgn0033834
AmiGO	FBgn0033770	wuc	wuc	CG12442	FBgn0033770
AmiGO	FBgn0033507	Dmel	CG12909	CG12909	FBgn0033507
AmiGO	FBgn0261647	Axud1	Axud1	CG4272	FBgn0261647
AmiGO	FBgn0003977	vir	vir	CG3496	FBgn0003977
AmiGO	FBgn0028685	Rpt4	Rpt4	CG3455	FBgn0028685
AmiGO	FBgn0034650	NC2alpha	NC2alpha	CG10318	FBgn0034650
AmiGO	FBgn0003449	snf	snf	CG4528	FBgn0003449
AmiGO	FBgn0037093	Cdk12	Cdk12	CG7597	FBgn0037093
AmiGO	FBgn0001215	Hrb98DE	Hrb98DE	CG9983	FBgn0001215
AmiGO	FBgn0032240	CG17768	CG17768	CG17768	FBgn0032240
AmiGO	FBgn0052856	CG32856	CG32856	CG32856	FBgn0052856
AmiGO	FBgn0036696	Pop5	Pop5	CG14057	FBgn0036696
AmiGO	FBgn0024807	DIP1	DIP1	CG17686	FBgn0024807
AmiGO	FBgn0051184	LSm3	LSm3	CG31184	FBgn0051184
AmiGO	FBgn0031390	tho2	tho2	CG31671	FBgn0031390
AmiGO	FBgn0261068	LSm7	LSm7	CG13277	FBgn0261068
AmiGO	FBgn0038772	mdlc	mdlc	CG4973	FBgn0038772
AmiGO	FBgn0038704	CG5316	CG5316	CG5316	FBgn0038704
AmiGO	FBgn0038013	CG10038	CG10038	CG10038	FBgn0038013
AmiGO	FBgn0085396	CG34367	CG34367	CG34367	FBgn0085396
AmiGO	FBgn0005658	Ets65A	Ets65A	CG7018	FBgn0005658
AmiGO	FBgn0005659	Ets98B	Ets98B	CG5583	FBgn0005659
AmiGO	FBgn0050401	dany	dany	CG30401	FBgn0050401
AmiGO	FBgn0030963	CG7101	CG7101	CG7101	FBgn0030963
AmiGO	FBgn0033458	Lime	Lime	CG18446	FBgn0033458
AmiGO	FBgn0031456	Tnpo	Tnpo-SR	CG2848	FBgn0031456
AmiGO	FBgn0010355	Taf1	Taf1	CG17603	FBgn0010355
AmiGO	FBgn0011701	repo	repo	CG31240	FBgn0011701
AmiGO	FBgn0023076	Clk	Clk	CG7391	FBgn0023076
AmiGO	FBgn0001180	hb	hb	CG9786	FBgn0001180
AmiGO	FBgn0001077	ftz	ftz	CG2047	FBgn0001077
AmiGO	FBgn0028999	nerfin	nerfin-1	CG13906	FBgn0028999
AmiGO	FBgn0034240	MESR4	MESR4	CG4903	FBgn0034240
AmiGO	FBgn0000662	fl	fl(2)d	CG6315	FBgn0000662
AmiGO	FBgn0000611	exd	exd	CG8933	FBgn0000611
AmiGO	FBgn0259789	zld	zld	CG12701	FBgn0259789
AmiGO	FBgn0004666	sim	sim	CG7771	FBgn0004666
AmiGO	FBgn0035625	Blimp	Blimp-1	CG5249	FBgn0035625
AmiGO	FBgn0003512	Sry	Sry-delta	CG17958	FBgn0003512
AmiGO	FBgn0003002	opa	opa	CG1133	FBgn0003002
AmiGO	FBgn0001222	Hsf	Hsf	CG5748	FBgn0001222
AmiGO	FBgn0001168	h	h	CG6494	FBgn0001168
AmiGO	FBgn0040670	e	e(y)2b	CG14612	FBgn0040670
AmiGO	FBgn0037446	Zif	Zif	CG10267	FBgn0037446
AmiGO	FBgn0033656	S2P	S2P	CG8988	FBgn0033656
AmiGO	FBgn0019650	toy	toy	CG11186	FBgn0019650
AmiGO	FBgn0002522	lab	lab	CG1264	FBgn0002522
AmiGO	FBgn0022787	Hel89B	Hel89B	CG4261	FBgn0022787
AmiGO	FBgn0002941	slou	slou	CG6534	FBgn0002941
AmiGO	FBgn0004053	zen	zen	CG1046	FBgn0004053
AmiGO	FBgn0002723	Met	Met	CG1705	FBgn0002723
AmiGO	FBgn0029905	Nf	Nf-YC	CG3075	FBgn0029905
AmiGO	FBgn0000625	eyg	eyg	CG10488	FBgn0000625
AmiGO	FBgn0000615	exu	exu	CG8994	FBgn0000615
AmiGO	FBgn0039183	Dis3	Dis3	CG6413	FBgn0039183
AmiGO	FBgn0042630	Sox21b	Sox21b	CG32139	FBgn0042630
AmiGO	FBgn0004880	scrt	scrt	CG1130	FBgn0004880
AmiGO	FBgn0004862	bap	bap	CG7902	FBgn0004862
AmiGO	FBgn0037672	sage	sage	CG12952	FBgn0037672
AmiGO	FBgn0036411	Sox21a	Sox21a	CG7345	FBgn0036411
AmiGO	FBgn0036285	toe	toe	CG10704	FBgn0036285
AmiGO	FBgn0004396	CrebA	CrebA	CG7450	FBgn0004396
AmiGO	FBgn0039509	bigmax	bigmax	CG3350	FBgn0039509
AmiGO	FBgn0010323	Gsc	Gsc	CG2851	FBgn0010323
AmiGO	FBgn0005613	Sox15	Sox15	CG8404	FBgn0005613
AmiGO	FBgn0034946	CG3065	CG3065	CG3065	FBgn0034946
AmiGO	FBgn0040305	MTF	MTF-1	CG3743	FBgn0040305
AmiGO	FBgn0021767	org	org-1	CG11202	FBgn0021767
AmiGO	FBgn0030082	HP1b	HP1b	CG7041	FBgn0030082
AmiGO	FBgn0045759	bin	bin	CG18647	FBgn0045759
AmiGO	FBgn0003430	slp1	slp1	CG16738	FBgn0003430
AmiGO	FBgn0003339	Scr	Scr	CG1030	FBgn0003339
AmiGO	FBgn0003267	ro	ro	CG6348	FBgn0003267
AmiGO	FBgn0003145	prd	prd	CG6716	FBgn0003145
AmiGO	FBgn0023215	Mnt	Mnt	CG13316	FBgn0023215
AmiGO	FBgn0028789	Doc1	Doc1	CG5133	FBgn0028789
AmiGO	FBgn0023091	dimm	dimm	CG8667	FBgn0023091
AmiGO	FBgn0261703	gce	gce	CG42739	FBgn0261703
AmiGO	FBgn0001185	her	her	CG4694	FBgn0001185
AmiGO	FBgn0035993	Nf	Nf-YA	CG3891	FBgn0035993
AmiGO	FBgn0265784	CrebB	CrebB	CG6103	FBgn0265784
AmiGO	FBgn0035956	Doc2	Doc2	CG5187	FBgn0035956
AmiGO	FBgn0035954	Doc3	Doc3	CG5093	FBgn0035954
AmiGO	FBgn0025679	Klf15	Klf15	CG2932	FBgn0025679
AmiGO	FBgn0038418	pad	pad	CG10309	FBgn0038418
AmiGO	FBgn0025776	ind	ind	CG11551	FBgn0025776
AmiGO	FBgn0005561	sv	sv	CG11049	FBgn0005561
AmiGO	FBgn0263512	Vsx2	Vsx2	CG33980	FBgn0263512
AmiGO	FBgn0263511	Vsx1	Vsx1	CG4136	FBgn0263511
AmiGO	FBgn0033636	tou	tou	CG10897	FBgn0033636
AmiGO	FBgn0034520	lms	lms	CG13424	FBgn0034520
AmiGO	FBgn0024288	Sox100B	Sox100B	CG15552	FBgn0024288
AmiGO	FBgn0024249	cato	cato	CG7760	FBgn0024249
AmiGO	FBgn0037436	Hr83	Hr83	CG10296	FBgn0037436
AmiGO	FBgn0039938	Sox102F	Sox102F	CG11153	FBgn0039938
AmiGO	FBgn0039937	fd102C	fd102C	CG11152	FBgn0039937
AmiGO	FBgn0002552	lin	lin	CG11770	FBgn0002552
AmiGO	FBgn0034379	CG15073	CG15073	CG15073	FBgn0034379
AmiGO	FBgn0034667	comr	comr	CG13493	FBgn0034667
AmiGO	FBgn0014143	croc	croc	CG5069	FBgn0014143
AmiGO	FBgn0032493	Mabi	Mabi	CG15479	FBgn0032493
AmiGO	FBgn0032473	kmg	kmg	CG5204	FBgn0032473
AmiGO	FBgn0000560	eg	eg	CG7383	FBgn0000560
AmiGO	FBgn0000529	bsh	bsh	CG10604	FBgn0000529
AmiGO	FBgn0036771	Wdr92	Wdr92	CG14353	FBgn0036771
AmiGO	FBgn0036761	MED19	MED19	CG5546	FBgn0036761
AmiGO	FBgn0004898	fd96Cb	fd96Cb	CG11922	FBgn0004898
AmiGO	FBgn0004897	fd96Ca	fd96Ca	CG11921	FBgn0004897
AmiGO	FBgn0004896	fd59A	fd59A	CG3668	FBgn0004896
AmiGO	FBgn0004895	FoxL1	FoxL1	CG1132	FBgn0004895
AmiGO	FBgn0031086	fd19B	fd19B	CG9571	FBgn0031086
AmiGO	FBgn0036318	Wbp2	Wbp2	CG11009	FBgn0036318
AmiGO	FBgn0027788	Hey	Hey	CG11194	FBgn0027788
AmiGO	FBgn0264954	fd3F	fd3F	CG44123	FBgn0264954
AmiGO	FBgn0266083	ocm	ocm	CG3363	FBgn0266083
AmiGO	FBgn0036126	Irbp18	Irbp18	CG6272	FBgn0036126
AmiGO	FBgn0034114	CG4282	CG4282	CG4282	FBgn0034114
AmiGO	FBgn0032940	Mondo	Mondo	CG18362	FBgn0032940
AmiGO	FBgn0034062	CG8388	CG8388	CG8388	FBgn0034062
AmiGO	FBgn0032741	Sidpn	Sidpn	CG10446	FBgn0032741
AmiGO	FBgn0051008	CG31008	CG31008	CG31008	FBgn0051008
AmiGO	FBgn0030003	CG2116	CG2116	CG2116	FBgn0030003
AmiGO	FBgn0028550	Atf3	Atf3	CG11405	FBgn0028550
AmiGO	FBgn0013755	Bro	Bro	CG7960	FBgn0013755
AmiGO	FBgn0013753	Bgb	Bgb	CG7959	FBgn0013753
AmiGO	FBgn0051481	pb	pb	CG31481	FBgn0051481
AmiGO	FBgn0027364	Six4	Six4	CG3871	FBgn0027364
AmiGO	FBgn0035036	CG4707	CG4707	CG4707	FBgn0035036
AmiGO	FBgn0001994	crp	crp	CG7664	FBgn0001994
AmiGO	FBgn0008646	E5	E5	CG9930	FBgn0008646
AmiGO	FBgn0043796	CG12219	CG12219	CG12219	FBgn0043796
AmiGO	FBgn0035232	CG12099	CG12099	CG12099	FBgn0035232
AmiGO	FBgn0013799	Deaf1	Deaf1	CG8567	FBgn0013799
AmiGO	FBgn0038852	HHEX	HHEX	CG7056	FBgn0038852
AmiGO	FBgn0038768	CG4936	CG4936	CG4936	FBgn0038768
AmiGO	FBgn0021738	Crg	Crg-1	CG32788	FBgn0021738
AmiGO	FBgn0033052	SCAP	SCAP	CG33131	FBgn0033052
AmiGO	FBgn0033010	Atf6	Atf6	CG3136	FBgn0033010
AmiGO	FBgn0001147	gsb	gsb-n	CG2692	FBgn0001147
AmiGO	FBgn0260243	E	E(var)3-9	CG11971	FBgn0260243
AmiGO	FBgn0052006	CG32006	CG32006	CG32006	FBgn0052006
AmiGO	FBgn0035997	phol	phol	CG3445	FBgn0035997
AmiGO	FBgn0040765	luna	luna	CG33473	FBgn0040765
AmiGO	FBgn0025874	Meics	Meics	CG8474	FBgn0025874
AmiGO	FBgn0020378	Sp1	Sp1	CG1343	FBgn0020378
AmiGO	FBgn0033627	CG13204	CG13204	CG13204	FBgn0033627
AmiGO	FBgn0035294	Mfap1	Mfap1	CG1017	FBgn0035294
AmiGO	FBgn0085369	Drgx	Drgx	CG34340	FBgn0085369
AmiGO	FBgn0038810	Srp72	Srp72	CG5434	FBgn0038810
AmiGO	FBgn0024251	bbx	bbx	CG1414	FBgn0024251
AmiGO	FBgn0024191	sip1	sip1	CG7238	FBgn0024191
AmiGO	FBgn0264744	CG44002	CG44002	CG44002	FBgn0264744
AmiGO	FBgn0034821	CG9876	CG9876	CG9876	FBgn0034821
AmiGO	FBgn0029928	CG3032	CG3032	CG3032	FBgn0029928
AmiGO	FBgn0036274	Dmel	CG4328	CG4328	FBgn0036274
AmiGO	FBgn0250850	rig	rig	CG30149	FBgn0250850
AmiGO	FBgn0024975	CG2712	CG2712	CG2712	FBgn0024975
AmiGO	FBgn0037922	CG14711	CG14711	CG14711	FBgn0037922
AmiGO	FBgn0037921	Zaf1	Zaf1	CG6808	FBgn0037921
AmiGO	FBgn0037918	CG6791	CG6791	CG6791	FBgn0037918
AmiGO	FBgn0039016	Dcr	Dcr-1	CG4792	FBgn0039016
AmiGO	FBgn0037584	CG7963	CG7963	CG7963	FBgn0037584
AmiGO	FBgn0004856	Bx42	Bx42	CG8264	FBgn0004856
AmiGO	FBgn0051632	sens	sens-2	CG31632	FBgn0051632
AmiGO	FBgn0030952	Dmel	CG12609	CG12609	FBgn0030952
AmiGO	FBgn0014931	CG2678	CG2678	CG2678	FBgn0014931
AmiGO	FBgn0036396	CG17359	CG17359	CG17359	FBgn0036396
AmiGO	FBgn0030314	CG11696	CG11696	CG11696	FBgn0030314
AmiGO	FBgn0036294	CG10654	CG10654	CG10654	FBgn0036294
AmiGO	FBgn0024887	kin17	kin17	CG5649	FBgn0024887
AmiGO	FBgn0036156	CG11726	CG11726	CG11726	FBgn0036156
AmiGO	FBgn0032979	Clamp	Clamp	CG1832	FBgn0032979
AmiGO	FBgn0039581	Moca	Moca-cyp	CG1866	FBgn0039581
AmiGO	FBgn0029148	NHP2	NHP2	CG5258	FBgn0029148
AmiGO	FBgn0030058	CG11294	CG11294	CG11294	FBgn0030058
AmiGO	FBgn0030012	CG18262	CG18262	CG18262	FBgn0030012
AmiGO	FBgn0025334	PHDP	PHDP	CG11182	FBgn0025334
AmiGO	FBgn0038765	CG4424	CG4424	CG4424	FBgn0038765
AmiGO	FBgn0035520	CG11586	CG11586	CG11586	FBgn0035520
AmiGO	FBgn0035518	CG15011	CG15011	CG15011	FBgn0035518
AmiGO	FBgn0050443	Opbp	Opbp	CG30443	FBgn0050443
AmiGO	FBgn0050431	CG30431	CG30431	CG30431	FBgn0050431
AmiGO	FBgn0003511	Sry	Sry-beta	CG7938	FBgn0003511
AmiGO	FBgn0050342	Prp38	Prp38	CG30342	FBgn0050342
AmiGO	FBgn0025185	az2	az2	CG1605	FBgn0025185
AmiGO	FBgn0013751	Awh	Awh	CG1072	FBgn0013751
AmiGO	FBgn0037722	CG8319	CG8319	CG8319	FBgn0037722
AmiGO	FBgn0039124	tbrd	tbrd-1	CG13597	FBgn0039124
AmiGO	FBgn0030969	Usp39	Usp39	CG7288	FBgn0030969
AmiGO	FBgn0260741	CG3281	CG3281	CG3281	FBgn0260741
AmiGO	FBgn0052532	CG32532	CG32532	CG32532	FBgn0052532
AmiGO	FBgn0270924	zf30C	zf30C	CG3998	FBgn0270924
AmiGO	FBgn0013531	MED20	MED20	CG18780	FBgn0013531
AmiGO	FBgn0035160	hng3	hng3	CG13897	FBgn0035160
AmiGO	FBgn0035063	CG3594	CG3594	CG3594	FBgn0035063
AmiGO	FBgn0008636	hbn	hbn	CG33152	FBgn0008636
AmiGO	FBgn0033548	CG7637	CG7637	CG7637	FBgn0033548
AmiGO	FBgn0028647	CG11902	CG11902	CG11902	FBgn0028647
AmiGO	FBgn0053557	CG33557	CG33557	CG33557	FBgn0053557
AmiGO	FBgn0033089	CG17266	CG17266	CG17266	FBgn0033089
AmiGO	FBgn0031894	CG4496	CG4496	CG4496	FBgn0031894
AmiGO	FBgn0037085	Neu2	Neu2	CG7204	FBgn0037085
AmiGO	FBgn0030316	CG11695	CG11695	CG11695	FBgn0030316
AmiGO	FBgn0035842	Dmel	CG7504	CG7504	FBgn0035842
AmiGO	FBgn0038547	CG17803	CG17803	CG17803	FBgn0038547
AmiGO	FBgn0035702	CG10147	CG10147	CG10147	FBgn0035702
AmiGO	FBgn0038301	CG6654	CG6654	CG6654	FBgn0038301
AmiGO	FBgn0015561	unpg	unpg	CG1650	FBgn0015561
AmiGO	FBgn0031597	CG17612	CG17612	CG17612	FBgn0031597
AmiGO	FBgn0030787	CG9609	CG9609	CG9609	FBgn0030787
AmiGO	FBgn0030659	CG9215	CG9215	CG9215	FBgn0030659
AmiGO	FBgn0025832	Fen1	Fen1	CG8648	FBgn0025832
AmiGO	FBgn0052105	Lmx1a	Lmx1a	CG32105	FBgn0052105
AmiGO	FBgn0051441	CG31441	CG31441	CG31441	FBgn0051441
AmiGO	FBgn0262739	AGO1	AGO1	CG6671	FBgn0262739
AmiGO	FBgn0011638	La	La	CG10922	FBgn0011638
AmiGO	FBgn0039740	ZIPIC	ZIPIC	CG7928	FBgn0039740
AmiGO	FBgn0039828	CG1542	CG1542	CG1542	FBgn0039828
AmiGO	FBgn0034232	CG4866	CG4866	CG4866	FBgn0034232
AmiGO	FBgn0034214	CG6550	CG6550	CG6550	FBgn0034214
AmiGO	FBgn0034187	Dmel	CG6967	CG6967	FBgn0034187
AmiGO	FBgn0032701	CG10341	CG10341	CG10341	FBgn0032701
AmiGO	FBgn0024364	CG11417	CG11417	CG11417	FBgn0024364
AmiGO	FBgn0000618	e	e(y)2	CG15191	FBgn0000618
AmiGO	FBgn0024956	Mat1	Mat1	CG7614	FBgn0024956
AmiGO	FBgn0032346	Csl4	Csl4	CG6249	FBgn0032346
AmiGO	FBgn0000448	Hr3	Hr3	CG33183	FBgn0000448
AmiGO	FBgn0000439	Dfd	Dfd	CG2189	FBgn0000439
AmiGO	FBgn0036451	Helz	Helz	CG9425	FBgn0036451
AmiGO	FBgn0039274	CG11920	CG11920	CG11920	FBgn0039274
AmiGO	FBgn0259234	Camta	Camta	CG42332	FBgn0287478
AmiGO	FBgn0002183	dre4	dre4	CG1828	FBgn0002183
AmiGO	FBgn0038135	CG8773	CG8773	CG8773	FBgn0038135
AmiGO	FBgn0261111	BHD	BHD	CG8616	FBgn0261111
AmiGO	FBgn0039743	Dmel	Jasper	CG7946	FBgn0039743
AmiGO	FBgn0000286	Cf2	Cf2	CG11924	FBgn0000286
AmiGO	FBgn0000233	btd	btd	CG12653	FBgn0000233
AmiGO	FBgn0032050	CG13096	CG13096	CG13096	FBgn0032050
AmiGO	FBgn0260642	Antp	Antp	CG1028	FBgn0260642
AmiGO	FBgn0033998	row	row	CG8092	FBgn0033998
AmiGO	FBgn0033993	CG8089	CG8089	CG8089	FBgn0033993
AmiGO	FBgn0035021	CG4622	CG4622	CG4622	FBgn0035021
AmiGO	FBgn0033806	FLASH	FLASH	CG4616	FBgn0033806
AmiGO	FBgn0033554	Lsm10	Lsm10	CG12938	FBgn0033554
AmiGO	FBgn0023094	cyc	cyc	CG8727	FBgn0023094
AmiGO	FBgn0011656	Mef2	Mef2	CG1429	FBgn0011656
AmiGO	FBgn0261872	scaf6	scaf6	CG33522	FBgn0261872
AmiGO	FBgn0001138	grn	grn	CG9656	FBgn0001138
AmiGO	FBgn0038391	GATAe	GATAe	CG10278	FBgn0038391
AmiGO	FBgn0015371	chn	chn	CG11798	FBgn0015371
AmiGO	FBgn0015240	Hr96	Hr96	CG11783	FBgn0015240
AmiGO	FBgn0010292	bys	bys	CG1430	FBgn0010292
AmiGO	FBgn0037359	MED27	MED27	CG1245	FBgn0037359
AmiGO	FBgn0020305	dbe	dbe	CG4258	FBgn0020305
AmiGO	FBgn0023489	Pph13	Pph13	CG2819	FBgn0023489
AmiGO	FBgn0002561	l	l(1)sc	CG3839	FBgn0002561
AmiGO	FBgn0002931	net	net	CG11450	FBgn0002931
AmiGO	FBgn0259938	cwo	cwo	CG17100	FBgn0259938
AmiGO	FBgn0262139	trh	trh	CG42865	FBgn0262139
AmiGO	FBgn0002734	E	E(spl)mdelta-HLH	CG8328	FBgn0002734
AmiGO	FBgn0002733	E	E(spl)mbeta-HLH	CG14548	FBgn0002733
AmiGO	FBgn0004400	rhi	rhi	CG10683	FBgn0004400
AmiGO	FBgn0004237	Hrb87F	Hrb87F	CG12749	FBgn0004237
AmiGO	FBgn0000964	tj	tj	CG10034	FBgn0000964
AmiGO	FBgn0267337	rn	rn	CG42277	FBgn0267337
AmiGO	FBgn0005638	slbo	slbo	CG4354	FBgn0005638
AmiGO	FBgn0000287	salr	salr	CG4881	FBgn0000287
AmiGO	FBgn0000179	bi	bi	CG3578	FBgn0000179
AmiGO	FBgn0011723	byn	byn	CG7260	FBgn0011723
AmiGO	FBgn0003460	so	so	CG11121	FBgn0003460
AmiGO	FBgn0016660	H15	H15	CG6604	FBgn0016660
AmiGO	FBgn0030434	Brms1	Brms1	CG4400	FBgn0030434
AmiGO	FBgn0020307	dve	dve	CG5799	FBgn0020307
AmiGO	FBgn0004618	gl	gl	CG7672	FBgn0004618
AmiGO	FBgn0033688	Prp8	Prp8	CG8877	FBgn0033688
AmiGO	FBgn0066304	Rpp20	Rpp20	CG33931	FBgn0066304
AmiGO	FBgn0022959	yps	yps	CG5654	FBgn0022959
AmiGO	FBgn0039797	eIF4H2	eIF4H2	CG1340	FBgn0039797
AmiGO	FBgn0250816	AGO3	AGO3	CG40300	FBgn0250816
AmiGO	FBgn0000520	dwg	dwg	CG2711	FBgn0000520
AmiGO	FBgn0261067	LSm1	LSm1	CG4279	FBgn0261067
AmiGO	FBgn0030915	CG6179	CG6179	CG6179	FBgn0030915
AmiGO	FBgn0036314	Sf3a2	Sf3a2	CG10754	FBgn0036314
AmiGO	FBgn0027549	Nulp1	Nulp1	CG7927	FBgn0027549
AmiGO	FBgn0259162	RunxB	RunxB	CG42267	FBgn0259162
AmiGO	FBgn0262601	SmB	SmB	CG5352	FBgn0262601
AmiGO	FBgn0262395	mir	mir-12	CR42932	FBgn0262395
AmiGO	FBgn0037372	Dmel	CG2091	CG2091	FBgn0037372
AmiGO	FBgn0265192	Snp	Snp	CG44248	FBgn0265192
AmiGO	FBgn0037617	nom	nom	CG8145	FBgn0037617
AmiGO	FBgn0035111	Dis3l2	Dis3l2	CG16940	FBgn0035111
AmiGO	FBgn0033454	CG1671	CG1671	CG1671	FBgn0033454
AmiGO	FBgn0263240	Coop	Coop	CG1621	FBgn0263240
AmiGO	FBgn0033352	PAN2	PAN2	CG8232	FBgn0033352
AmiGO	FBgn0085693	Dmel	CG41562	CG41562	FBgn0085693
AmiGO	FBgn0031868	Rat1	Rat1	CG10354	FBgn0031868
AmiGO	FBgn0030524	Dmel	CG10993	CG10993	FBgn0030524
AmiGO	FBgn0085521	Dmel	CG40813	CG40813	FBgn0085521
AmiGO	FBgn0004607	zfh2	zfh2	CG1449	FBgn0004607
AmiGO	FBgn0052708	CG6997	CG32708	CG32708	FBgn0052708
AmiGO	FBgn0024993	EG	CG2662	CG2662	FBgn0024993
AmiGO	FBgn0004567	slp2	slp2	CG2939	FBgn0004567
AmiGO	FBgn0036373	Tgi	Tgi	CG10741	FBgn0036373
AmiGO	FBgn0004362	HmgD	HmgD	CG17950	FBgn0004362
AmiGO	FBgn0039350	jigr1	jigr1	CG17383	FBgn0039350
AmiGO	FBgn0039602	CG1647	CG1647	CG1647	FBgn0039602
AmiGO	FBgn0038979	tHMG2	tHMG2	CG7046	FBgn0038979
AmiGO	FBgn0038978	tHMG1	tHMG1	CG7045	FBgn0038978
AmiGO	FBgn0263143	vret	vret	CG4771	FBgn0263143
AmiGO	FBgn0010228	HmgZ	HmgZ	CG17921	FBgn0010228
AmiGO	FBgn0037317	CG14667	CG14667	CG14667	FBgn0037317
AmiGO	FBgn0000377	crn	crn	CG3193	FBgn0000377
AmiGO	FBgn0039863	CG1815	CG1815	CG1815	FBgn0039863
AmiGO	FBgn0262017	CG42830	CG42830	CG42830	FBgn0262017
AmiGO	FBgn0032763	CG17568	CG17568	CG17568	FBgn0032763
AmiGO	FBgn0000567	Eip74EF	Eip74EF	CG32180	FBgn0000567
AmiGO	FBgn0024973	CG2701	CG2701	CG2701	FBgn0024973
AmiGO	FBgn0020617	Rx	Rx	CG10052	FBgn0020617
AmiGO	FBgn0004865	Eip78C	Eip78C	CG18023	FBgn0004865
AmiGO	FBgn0054031	CG34031	CG34031	CG34031	FBgn0054031
AmiGO	FBgn0022740	HLH54F	HLH54F	CG5005	FBgn0022740
AmiGO	FBgn0284249	Adf1	Adf1	CG15845	FBgn0284249
AmiGO	FBgn0026577	CG8677	CG8677	CG8677	FBgn0026577
AmiGO	FBgn0031419	CG15390	CG15390	CG15390	FBgn0031419
AmiGO	FBgn0037475	Fer1	Fer1	CG33323	FBgn0037475
AmiGO	FBgn0035397	PAN3	PAN3	CG11486	FBgn0035397
AmiGO	FBgn0001983	wor	wor	CG4158	FBgn0001983
AmiGO	FBgn0001978	stc	stc	CG3647	FBgn0001978
AmiGO	FBgn0011837	Tis11	Tis11	CG4070	FBgn0011837
AmiGO	FBgn0023167	SmD3	SmD3	CG8427	FBgn0023167
AmiGO	FBgn0033183	CG1620	CG1620	CG1620	FBgn0033183
AmiGO	FBgn0001170	H2	H2.0	CG11607	FBgn0001170
AmiGO	FBgn0033015	d4	d4	CG2682	FBgn0033015
AmiGO	FBgn0287478	Camta	Camta	CG42332	FBgn0287478
AmiGO	FBgn0085253	CG34224	CG34224	CG34224	FBgn0085253
AmiGO	FBgn0028982	Spt6	Spt6	CG12225	FBgn0028982
AmiGO	FBgn0038805	TFAM	TFAM	CG4217	FBgn0038805
AmiGO	FBgn0034878	pita	pita	CG3941	FBgn0034878
AmiGO	FBgn0051612	CG31612	CG31612	CG31612	FBgn0051612
AmiGO	FBgn0037620	ranshi	ranshi	CG9793	FBgn0037620
AmiGO	FBgn0026160	tna	tna	CG7958	FBgn0026160
AmiGO	FBgn0262656	Myc	Myc	CG10798	FBgn0262656
AmiGO	FBgn0262636	dati	dati	CG2052	FBgn0262636
AmiGO	FBgn0026575	hang	hang	CG32575	FBgn0026575
AmiGO	FBgn0036804	Sgf11	Sgf11	CG13379	FBgn0036804
AmiGO	FBgn0265487	mbl	mbl	CG33197	FBgn0265487
AmiGO	FBgn0035626	lin	lin-28	CG17334	FBgn0035626
AmiGO	FBgn0000289	cg	cg	CG8367	FBgn0000289
AmiGO	FBgn0036621	roq	roq	CG16807	FBgn0036621
AmiGO	FBgn0037698	CG16779	CG16779	CG16779	FBgn0037698
AmiGO	FBgn0011766	E2f1	E2f1	CG6376	FBgn0011766
AmiGO	FBgn0261963	mid	mid	CG6634	FBgn0261963
AmiGO	FBgn0024244	drm	drm	CG10016	FBgn0024244
AmiGO	FBgn0034261	HPS4	HPS4	CG4966	FBgn0034261
AmiGO	FBgn0019949	Cdk9	Cdk9	CG5179	FBgn0019949
AmiGO	FBgn0034879	Rrp4	Rrp4	CG3931	FBgn0034879
AmiGO	FBgn0002985	odd	odd	CG3851	FBgn0002985
AmiGO	FBgn0004893	bowl	bowl	CG10021	FBgn0004893
AmiGO	FBgn0004892	sob	sob	CG3242	FBgn0004892
AmiGO	FBgn0003896	tup	tup	CG10619	FBgn0003896
AmiGO	FBgn0284256	bsf	bsf	CG10302	FBgn0284256
AmiGO	FBgn0000028	acj6	acj6	CG9151	FBgn0000028
AmiGO	FBgn0032209	Hand	Hand	CG18144	FBgn0032209
AmiGO	FBgn0261953	TfAP	TfAP-2	CG7807	FBgn0261953
AmiGO	FBgn0001179	hay	hay	CG8019	FBgn0001179
AmiGO	FBgn0022238	lolal	lolal	CG5738	FBgn0022238
AmiGO	FBgn0082598	akirin	akirin	CG8580	FBgn0082598
AmiGO	FBgn0016070	smg	smg	CG5263	FBgn0016070
AmiGO	FBgn0039585	CG1894	CG1894	CG1894	FBgn0039585
AmiGO	FBgn0039411	dysf	dysf	CG32474	FBgn0039411
AmiGO	FBgn0034939	thoc5	thoc5	CG2980	FBgn0034939
AmiGO	FBgn0263832	Rcd5	Rcd5	CG1135	FBgn0263832
AmiGO	FBgn0028707	Mt2	Mt2	CG10692	FBgn0028707
AmiGO	FBgn0001323	knrl	knrl	CG4761	FBgn0001323
AmiGO	FBgn0004837	Su	Su(H)	CG3497	FBgn0004837
AmiGO	FBgn0263237	Cdk7	Cdk7	CG3319	FBgn0263237
AmiGO	FBgn0264075	tgo	tgo	CG11987	FBgn0264075
AmiGO	FBgn0000504	dsx	dsx	CG11094	FBgn0000504
AmiGO	FBgn0000411	D	D	CG5893	FBgn0000411
AmiGO	FBgn0000146	aub	aub	CG6137	FBgn0000146
AmiGO	FBgn0034853	Ice1	Ice1	CG13550	FBgn0034853
AmiGO	FBgn0259935	CG42458	CG42458	CG42458	FBgn0259935
AmiGO	FBgn0019890	Smg5	Smg5	CG8954	FBgn0019890
AmiGO	FBgn0262266	mir	mir-980	CR42973	FBgn0262266
AmiGO	FBgn0262323	mir	mir-252	CR43030	FBgn0262323
AmiGO	FBgn0039189	CG18528	CG18528	CG18528	FBgn0039189
AmiGO	FBgn0032429	CG5446	CG5446	CG5446	FBgn0032429
AmiGO	FBgn0036735	Edc3	Edc3	CG6311	FBgn0036735
AmiGO	FBgn0031115	CG11710	CG11710	CG11710	FBgn0031115
AmiGO	FBgn0031041	Pstk	Pstk	CG12788	FBgn0031041
AmiGO	FBgn0036249	CG11560	CG11560	CG11560	FBgn0036249
AmiGO	FBgn0051133	Slimp	Slimp	CG31133	FBgn0051133
AmiGO	FBgn0039385	CG5913	CG5913	CG5913	FBgn0039385
AmiGO	FBgn0262434	mir	mir-11	CR42992	FBgn0262434
AmiGO	FBgn0262371	mir	mir-263b	CR42886	FBgn0262371
AmiGO	FBgn0005660	Ets21C	Ets21C	CG2914	FBgn0005660
AmiGO	FBgn0037504	CG1142	CG1142	CG1142	FBgn0037504
AmiGO	FBgn0030623	PPYR1	PPYR1	CG15031	FBgn0030623
AmiGO	FBgn0037371	Sym	Sym	CG2097	FBgn0037371
AmiGO	FBgn0035643	CG13287	CG13287	CG13287	FBgn0035643
AmiGO	FBgn0265047	FDY	FDY	CG41503	FBgn0265047
AmiGO	FBgn0033926	Arc1	Arc1	CG12505	FBgn0033926
AmiGO	FBgn0023542	Nmd3	Nmd3	CG3460	FBgn0023542
AmiGO	FBgn0023213	eIF4G1	eIF4G1	CG10811	FBgn0023213
AmiGO	FBgn0011824	CG4038	CG4038	CG4038	FBgn0011824
AmiGO	FBgn0038934	Gld2	Gld2	CG5732	FBgn0038934
AmiGO	FBgn0040368	eIF4E7	eIF4E7	CG32859	FBgn0040368
AmiGO	FBgn0035709	eIF4E4	eIF4E4	CG10124	FBgn0035709
AmiGO	FBgn0035823	eIF4E5	eIF4E5	CG8277	FBgn0035823
AmiGO	FBgn0030217	CG2124	CG2124	CG2124	FBgn0030217
AmiGO	FBgn0031446	Trf5	Trf5	CG15398	FBgn0031446
AmiGO	FBgn0031444	Trf4	Trf4	CG9879	FBgn0031444
AmiGO	FBgn0002573	sens	sens	CG32120	FBgn0002573
AmiGO	FBgn0024184	unc	unc-4	CG6269	FBgn0024184
AmiGO	FBgn0004102	oc	oc	CG12154	FBgn0004102
AmiGO	FBgn0000577	en	en	CG9015	FBgn0000577
AmiGO	FBgn0026058	OdsH	OdsH	CG6352	FBgn0026058
AmiGO	FBgn0000014	abd	abd-A	CG10325	FBgn0000014
AmiGO	FBgn0028887	Dmel	CG3491	CG3491	FBgn0028887
AmiGO	FBgn0003507	srp	srp	CG3992	FBgn0003507
AmiGO	FBgn0030699	CG8578	CG8578	CG8578	FBgn0030699
AmiGO	FBgn0003396	shn	shn	CG7734	FBgn0003396
AmiGO	FBgn0038976	Pfdn5	Pfdn5	CG7048	FBgn0038976
AmiGO	FBgn0085432	pan	pan	CG34403	FBgn0085432
AmiGO	FBgn0015524	otp	otp	CG10036	FBgn0015524
AmiGO	FBgn0015381	dsf	dsf	CG9019	FBgn0015381
AmiGO	FBgn0028979	tio	tio	CG12630	FBgn0028979
AmiGO	FBgn0024330	MED6	MED6	CG9473	FBgn0024330
AmiGO	FBgn0039209	REPTOR	REPTOR	CG13624	FBgn0039209
AmiGO	FBgn0000459	disco	disco	CG9908	FBgn0000459
AmiGO	FBgn0041111	lilli	lilli	CG8817	FBgn0041111
AmiGO	FBgn0004510	Ets97D	Ets97D	CG6338	FBgn0004510
AmiGO	FBgn0037981	Spt3	Spt3	CG3169	FBgn0037981
AmiGO	FBgn0039566	CG4849	CG4849	CG4849	FBgn0039566
AmiGO	FBgn0284250	Oaz	Oaz	CG42702	FBgn0284250
AmiGO	FBgn0000061	al	al	CG3935	FBgn0000061
AmiGO	FBgn0030093	Bap111	Bap111	CG7055	FBgn0030093
AmiGO	FBgn0035407	Asciz	Asciz	CG14962	FBgn0035407
AmiGO	FBgn0035357	MEP	MEP-1	CG1244	FBgn0035357
AmiGO	FBgn0037751	topi	topi	CG8484	FBgn0037751
AmiGO	FBgn0038551	Odj	Odj	CG7357	FBgn0038551
AmiGO	FBgn0040465	Dlip3	Dlip3	CG12767	FBgn0040465
AmiGO	FBgn0265523	Smr	Smr	CG4013	FBgn0265523
AmiGO	FBgn0030541	CG11584	CG11584	CG11584	FBgn0030541
AmiGO	FBgn0261239	Hr39	Hr39	CG8676	FBgn0261239
AmiGO	FBgn0028577	hfp	hfp	CG12085	FBgn0028577
AmiGO	FBgn0039225	Ets96B	Ets96B	CG6892	FBgn0039225
AmiGO	FBgn0285879	disco	disco-r	CG32577	FBgn0285879
AmiGO	FBgn0263510	nclb	nclb	CG6751	FBgn0263510
AmiGO	FBgn0039788	Rpt6R	Rpt6R	CG2241	FBgn0039788
AmiGO	FBgn0004170	sc	sc	CG3827	FBgn0004170
AmiGO	FBgn0004101	bs	bs	CG3411	FBgn0004101
AmiGO	FBgn0019809	gcm2	gcm2	CG3858	FBgn0019809
AmiGO	FBgn0267821	da	da	CG5102	FBgn0267821
AmiGO	FBgn0004863	C15	C15	CG7937	FBgn0004863
AmiGO	FBgn0000591	E	E(spl)m8-HLH	CG8365	FBgn0000591
AmiGO	FBgn0036224	Rpt4R	Rpt4R	CG7257	FBgn0036224
AmiGO	FBgn0045852	ham	ham	CG31753	FBgn0045852
AmiGO	FBgn0037742	Rpt3R	Rpt3R	CG9475	FBgn0037742
AmiGO	FBgn0000166	bcd	bcd	CG1034	FBgn0000166
AmiGO	FBgn0028687	Rpt1	Rpt1	CG1341	FBgn0028687
AmiGO	FBgn0028686	Rpt3	Rpt3	CG16916	FBgn0028686
AmiGO	FBgn0001320	kni	kni	CG4717	FBgn0001320
AmiGO	FBgn0278608	Dsp1	Dsp1	CG12223	FBgn0278608
AmiGO	FBgn0261283	SREBP	SREBP	CG8522	FBgn0261283
AmiGO	FBgn0020369	Rpt6	Rpt6	CG1489	FBgn0020369
AmiGO	FBgn0014859	Hr38	Hr38	CG1864	FBgn0014859
AmiGO	FBgn0043900	pygo	pygo	CG11518	FBgn0043900
AmiGO	FBgn0016076	vri	vri	CG14029	FBgn0016076
AmiGO	FBgn0041092	tai	tai	CG13109	FBgn0041092
AmiGO	FBgn0035542	DOR	DOR	CG11347	FBgn0035542
AmiGO	FBgn0027339	jim	jim	CG11352	FBgn0027339
AmiGO	FBgn0263392	Tet	Tet	CG43444	FBgn0263392
AmiGO	FBgn0035769	CTCF	CTCF	CG8591	FBgn0035769
AmiGO	FBgn0011278	lbe	lbe	CG6545	FBgn0011278
AmiGO	FBgn0028962	AlaRS	AlaRS-m	CG4633	FBgn0028962
AmiGO	FBgn0259937	Nop60B	Nop60B	CG3333	FBgn0259937
AmiGO	FBgn0027094	AlaRS	AlaRS	CG13391	FBgn0027094
AmiGO	FBgn0029939	CG9650	CG9650	CG9650	FBgn0029939
AmiGO	FBgn0036686	CG7728	CG7728	CG7728	FBgn0036686
AmiGO	FBgn0027330	l	l(1)G0020	CG1994	FBgn0027330
AmiGO	FBgn0013435	Cdc2rk	Cdc2rk	CG1362	FBgn0013435
AmiGO	FBgn0263198	Acn	Acn	CG10473	FBgn0263198
AmiGO	FBgn0028530	mTTF	mTTF	CG18124	FBgn0028530
AmiGO	FBgn0038584	mTerf5	mTerf5	CG7175	FBgn0038584
AmiGO	FBgn0037073	Tsr1	Tsr1	CG7338	FBgn0037073
AmiGO	FBgn0027587	Prp4k	Prp4k	CG7028	FBgn0027587
AmiGO	FBgn0028926	NC2beta	NC2beta	CG4185	FBgn0028926
AmiGO	FBgn0003117	pnr	pnr	CG3978	FBgn0003117
AmiGO	FBgn0000370	crc	crc	CG8669	FBgn0000370
AmiGO	FBgn0002576	lz	lz	CG1689	FBgn0002576
AmiGO	FBgn0000606	eve	eve	CG2328	FBgn0000606
AmiGO	FBgn0000568	Eip75B	Eip75B	CG8127	FBgn0000568
AmiGO	FBgn0031375	erm	erm	CG31670	FBgn0031375
AmiGO	FBgn0003720	tll	tll	CG1378	FBgn0003720
AmiGO	FBgn0013764	Chi	Chi	CG3924	FBgn0013764
AmiGO	FBgn0265193	Atf	Atf-2	CG44246	FBgn0265193
AmiGO	FBgn0003448	sna	sna	CG3956	FBgn0003448
AmiGO	FBgn0003345	sd	sd	CG8544	FBgn0003345
AmiGO	FBgn0003028	ovo	ovo	CG6824	FBgn0003028
AmiGO	FBgn0263239	dar1	dar1	CG12029	FBgn0263239
AmiGO	FBgn0266599	Hsc70	Hsc70-4	CG4264	FBgn0266599
AmiGO	FBgn0003963	ush	ush	CG2762	FBgn0003963
AmiGO	FBgn0287768	esg	esg	CG3758	FBgn0287768
AmiGO	FBgn0011655	Med	Med	CG1775	FBgn0011655
AmiGO	FBgn0024250	brk	brk	CG9653	FBgn0024250
AmiGO	FBgn0039932	fuss	fuss	CG11093	FBgn0039932
AmiGO	FBgn0262975	cnc	cnc	CG43286	FBgn0262975
AmiGO	FBgn0034617	Panx	Panx	CG9754	FBgn0034617
AmiGO	FBgn0002735	E	E(spl)mgamma-HLH	CG8333	FBgn0002735
AmiGO	FBgn0026411	Lim1	Lim1	CG11354	FBgn0026411
AmiGO	FBgn0004597	CycC	CycC	CG7281	FBgn0004597
AmiGO	FBgn0032816	Nf	Nf-YB	CG10447	FBgn0032816
AmiGO	FBgn0029123	SoxN	SoxN	CG18024	FBgn0029123
AmiGO	FBgn0043364	cbt	cbt	CG4427	FBgn0043364
AmiGO	FBgn0003567	su	su(Hw)	CG8573	FBgn0003567
AmiGO	FBgn0037760	FBXO11	FBXO11	CG9461	FBgn0037760
AmiGO	FBgn0037618	ouib	ouib	CG11762	FBgn0037618
AmiGO	FBgn0000137	ase	ase	CG3258	FBgn0000137
AmiGO	FBgn0015919	caup	caup	CG10605	FBgn0015919
AmiGO	FBgn0015904	ara	ara	CG10571	FBgn0015904
AmiGO	FBgn0001150	gt	gt	CG7952	FBgn0001150
AmiGO	FBgn0025463	Bap60	Bap60	CG4303	FBgn0025463
AmiGO	FBgn0261434	hkb	hkb	CG9768	FBgn0261434
AmiGO	FBgn0005558	ey	ey	CG1464	FBgn0005558
AmiGO	FBgn0004606	zfh1	zfh1	CG1322	FBgn0004606
AmiGO	FBgn0002609	E	E(spl)m3-HLH	CG8346	FBgn0002609
AmiGO	FBgn0002441	l	l(3)mbt	CG5954	FBgn0002441
AmiGO	FBgn0086613	Ino80	Ino80	CG31212	FBgn0086613
AmiGO	FBgn0029504	CHES	CHES-1-like	CG12690	FBgn0029504
AmiGO	FBgn0002922	nau	nau	CG10250	FBgn0002922
AmiGO	FBgn0034722	Rtf1	Rtf1	CG10955	FBgn0034722
AmiGO	FBgn0264442	ab	ab	CG43860	FBgn0264442
AmiGO	FBgn0000576	ems	ems	CG2988	FBgn0000576
AmiGO	FBgn0010762	simj	simj	CG32067	FBgn0010762
AmiGO	FBgn0032391	escl	escl	CG5202	FBgn0032391
AmiGO	FBgn0000427	dec	2001-12-01	CG2175	FBgn0000427
AmiGO	FBgn0037802	Sirt6	Sirt6	CG6284	FBgn0037802
AmiGO	FBgn0036746	Crtc	Crtc	CG6064	FBgn0036746
AmiGO	FBgn0031036	CG14220	CG14220	CG14220	FBgn0031036
AmiGO	FBgn0004372	aly	aly	CG2075	FBgn0004372
AmiGO	FBgn0036134	FoxK	FoxK	CG11799	FBgn0036134
AmiGO	FBgn0032925	CG9246	CG9246	CG9246	FBgn0032925
AmiGO	FBgn0039631	Sirt7	Sirt7	CG11305	FBgn0039631
AmiGO	FBgn0032651	Oli	Oli	CG5545	FBgn0032651
AmiGO	FBgn0005612	Sox14	Sox14	CG3090	FBgn0005612
AmiGO	FBgn0038016	MBD	MBD-R2	CG10042	FBgn0038016
AmiGO	FBgn0285917	sbb	sbb	CG5580	FBgn0285917
AmiGO	FBgn0025360	Optix	Optix	CG18455	FBgn0025360
AmiGO	FBgn0035384	CG2113	CG2113	CG2113	FBgn0035384
AmiGO	FBgn0263118	tx	tx	CG5441	FBgn0263118
AmiGO	FBgn0003270	amos	amos	CG10393	FBgn0003270
AmiGO	FBgn0003130	Poxn	Poxn	CG8246	FBgn0003130
AmiGO	FBgn0003129	Poxm	Poxm	CG9610	FBgn0003129
AmiGO	FBgn0033846	mip120	mip120	CG6061	FBgn0033846
AmiGO	FBgn0023540	CG3630	CG3630	CG3630	FBgn0023540
AmiGO	FBgn0023509	mip130	mip130	CG3480	FBgn0023509
AmiGO	FBgn0001990	wek	wek	CG4148	FBgn0001990
AmiGO	FBgn0263106	DnaJ	DnaJ-1	CG10578	FBgn0263106
AmiGO	FBgn0261984	Ire1	Ire1	CG4583	FBgn0261984
AmiGO	FBgn0043456	Ndf	Ndf	CG4747	FBgn0043456
AmiGO	FBgn0038767	trem	trem	CG4413	FBgn0038767
AmiGO	FBgn0001269	inv	inv	CG17835	FBgn0001269
AmiGO	FBgn0085451	htk	htk	CG34422	FBgn0085451
AmiGO	FBgn0001148	gsb	gsb	CG3388	FBgn0001148
AmiGO	FBgn0001139	gro	gro	CG8384	FBgn0001139
AmiGO	FBgn0001133	grau	grau	CG33133	FBgn0001133
AmiGO	FBgn0265630	sno	sno	CG44436	FBgn0265630
AmiGO	FBgn0265623	Su	Su(z)2	CG3905	FBgn0265623
AmiGO	FBgn0015239	Hr78	Hr78	CG7199	FBgn0015239
AmiGO	FBgn0035849	ERR	ERR	CG7404	FBgn0035849
AmiGO	FBgn0031698	Ncoa6	Ncoa6	CG14023	FBgn0031698
AmiGO	FBgn0030505	NFAT	NFAT	CG11172	FBgn0030505
AmiGO	FBgn0052343	Atac3	Atac3	CG32343	FBgn0052343
AmiGO	FBgn0040918	schlank	schlank	CG3576	FBgn0040918
AmiGO	FBgn0033264	Nup50	Nup50	CG2158	FBgn0033264
AmiGO	FBgn0261648	salm	salm	CG6464	FBgn0261648
AmiGO	FBgn0004110	tin	tin	CG7895	FBgn0004110
AmiGO	FBgn0014343	mirr	mirr	CG10601	FBgn0014343
AmiGO	FBgn0024371	E2f2	E2f2	CG1071	FBgn0024371
AmiGO	FBgn0003300	run	run	CG1849	FBgn0003300
AmiGO	FBgn0013263	Trl	Trl	CG33261	FBgn0013263
AmiGO	FBgn0001235	hth	hth	CG17117	FBgn0001235
AmiGO	FBgn0003866	tsh	tsh	CG1374	FBgn0003866
AmiGO	FBgn0001078	ftz	ftz-f1	CG4059	FBgn0001078
AmiGO	FBgn0011648	Mad	Mad	CG12399	FBgn0011648
AmiGO	FBgn0031820	Daxx	Daxx	CG9537	FBgn0031820
AmiGO	FBgn0030697	CG8565	CG8565	CG8565	FBgn0030697
AmiGO	FBgn0010660	Nup214	Nup214	CG3820	FBgn0010660
AmiGO	FBgn0262455	mir	mir-1	CR43027	FBgn0262455
AmiGO	FBgn0003741	tra	tra	CG16724	FBgn0003741
AmiGO	FBgn0045862	btz	btz	CG12878	FBgn0045862
AmiGO	FBgn0000283	Cp190	Cp190	CG6384	FBgn0000283
AmiGO	FBgn0037105	S1P	S1P	CG7169	FBgn0037105
AmiGO	FBgn0015218	eIF4E1	eIF4E1	CG4035	FBgn0015218
AmiGO	FBgn0083981	RunxA	RunxA	CG34145	FBgn0083981
AmiGO	FBgn0052706	CG32706	CG32706	CG32706	FBgn0052706
AmiGO	FBgn0286786	hoip	hoip	CG3949	FBgn0286786
AmiGO	FBgn0033624	CG12384	CG12384	CG12384	FBgn0033624
AmiGO	FBgn0032202	REPTOR	REPTOR-BP	CG18619	FBgn0032202
AmiGO	FBgn0039972	Marf1	Marf1	CG17018	FBgn0039972
AmiGO	FBgn0259986	nab	nab	CG33545	FBgn0259986
AmiGO	FBgn0004870	bab1	bab1	CG9097	FBgn0004870
AmiGO	FBgn0264490	Eip93F	Eip93F	CG18389	FBgn0264490
AmiGO	FBgn0002283	l	l(3)73Ah	CG4195	FBgn0002283
AmiGO	FBgn0032330	Samuel	Samuel	CG31868	FBgn0032330
AmiGO	FBgn0032348	CG4751	CG4751	CG4751	FBgn0032348
AmiGO	FBgn0004860	ph	ph-d	CG3895	FBgn0004860
AmiGO	FBgn0036661	CG9705	CG9705	CG9705	FBgn0036661
AmiGO	FBgn0266129	lov	lov	CG16778	FBgn0266129
AmiGO	FBgn0032730	CG10431	CG10431	CG10431	FBgn0032730
AmiGO	FBgn0010328	woc	woc	CG5965	FBgn0010328
AmiGO	FBgn0037669	Ibf2	Ibf2	CG9740	FBgn0037669
AmiGO	FBgn0037607	CG8036	CG8036	CG8036	FBgn0037607
AmiGO	FBgn0052529	Hers	Hers	CG32529	FBgn0052529
AmiGO	FBgn0053853	His2A	His2A:CG33853	CG33853	FBgn0053853
AmiGO	FBgn0033341	MrgBP	MrgBP	CG13746	FBgn0033341
AmiGO	FBgn0033166	Eaf	Eaf	CG11166	FBgn0033166
AmiGO	FBgn0031999	CG8419	CG8419	CG8419	FBgn0031999
AmiGO	FBgn0011481	Ssdp	Ssdp	CG7187	FBgn0011481
AmiGO	FBgn0261723	Dbx	Dbx	CG42234	FBgn0261723
AmiGO	FBgn0031606	Dmel	CG15439	CG15439	FBgn0031606
AmiGO	FBgn0031715	tomb	tomb	CG14016	FBgn0031715
AmiGO	FBgn0025525	bab2	bab2	CG9102	FBgn0025525
AmiGO	FBgn0030121	Cfp1	Cfp1	CG17446	FBgn0030121
AmiGO	FBgn0031435	Elba2	Elba2	CG9883	FBgn0031435
AmiGO	FBgn0031434	insv	insv	CG3227	FBgn0031434
AmiGO	FBgn0015602	BEAF	BEAF-32	CG10159	FBgn0015602
AmiGO	FBgn0267033	mamo	mamo	CG45477	FBgn0267033
AmiGO	FBgn0004859	ci	ci	CG2125	FBgn0004859
AmiGO	FBgn0086680	vvl	vvl	CG10037	FBgn0086680
AmiGO	FBgn0002521	pho	pho	CG17743	FBgn0002521
AmiGO	FBgn0002914	Myb	Myb	CG9045	FBgn0002914
AmiGO	FBgn0014179	gcm	gcm	CG12245	FBgn0014179
AmiGO	FBgn0266411	sima	sima	CG45051	FBgn0266411
AmiGO	FBgn0259211	grh	grh	CG42311	FBgn0259211
AmiGO	FBgn0003651	svp	svp	CG11502	FBgn0003651
AmiGO	FBgn0015903	apt	apt	CG5393	FBgn0015903
AmiGO	FBgn0260632	dl	dl	CG6667	FBgn0260632
AmiGO	FBgn0261983	l	l(2)gd1	CG4713	FBgn0261983
AmiGO	FBgn0283451	br	br	CG11491	FBgn0283451
AmiGO	FBgn0011274	Dif	Dif	CG6794	FBgn0011274
AmiGO	FBgn0010109	dpn	dpn	CG8704	FBgn0010109
AmiGO	FBgn0003415	skd	skd	CG9936	FBgn0003415
AmiGO	FBgn0011640	lark	lark	CG8597	FBgn0011640
AmiGO	FBgn0038808	Srp14	Srp14	CG5417	FBgn0038808
AmiGO	FBgn0000376	crm	crm	CG2714	FBgn0000376
AmiGO	FBgn0014022	Rlb1	Rlb1	CG8161	FBgn0014022
AmiGO	FBgn0034921	DCP1	DCP1	CG11183	FBgn0034921
AmiGO	FBgn0034915	eIF6	eIF6	CG17611	FBgn0034915
AmiGO	FBgn0264562	Hr4	Hr4	CG43934	FBgn0264562
AmiGO	FBgn0002736	mago	mago	CG9401	FBgn0002736
AmiGO	FBgn0010825	Gug	Gug	CG6964	FBgn0010825
AmiGO	FBgn0037923	CG6813	CG6813	CG6813	FBgn0037923
AmiGO	FBgn0004914	Hnf4	Hnf4	CG9310	FBgn0004914
AmiGO	FBgn0004854	B	B-H2	CG5488	FBgn0004854
AmiGO	FBgn0003862	trx	trx	CG8651	FBgn0003862
AmiGO	FBgn0004795	retn	retn	CG5403	FBgn0004795
AmiGO	FBgn0036534	DCP2	DCP2	CG6169	FBgn0036534
AmiGO	FBgn0027868	Nup107	Nup107	CG6743	FBgn0027868
AmiGO	FBgn0036168	CG7512	CG7512	CG7512	FBgn0036168
AmiGO	FBgn0267978	ap	ap	CG8376	FBgn0267978
AmiGO	FBgn0000157	Dll	Dll	CG3629	FBgn0000157
AmiGO	FBgn0033973	HPS1	HPS1	CG12855	FBgn0033973
AmiGO	FBgn0087008	e	e(y)3	CG12238	FBgn0087008
AmiGO	FBgn0011758	B	B-H1	CG5529	FBgn0011758
AmiGO	FBgn0263112	Mitf	Mitf	CG43369	FBgn0263112
AmiGO	FBgn0003900	twi	twi	CG2956	FBgn0003900
AmiGO	FBgn0030663	CG8117	CG8117	CG8117	FBgn0030663
AmiGO	FBgn0052296	Mrtf	Mrtf	CG32296	FBgn0052296
AmiGO	FBgn0020309	crol	crol	CG14938	FBgn0020309
AmiGO	FBgn0025802	Sbf	Sbf	CG6939	FBgn0025802
AmiGO	FBgn0004050	z	z	CG7803	FBgn0004050
AmiGO	FBgn0032401	Plzf	Plzf	CG6792	FBgn0032401
AmiGO	FBgn0010768	sqz	sqz	CG5557	FBgn0010768
AmiGO	FBgn0000492	Dr	Dr	CG1897	FBgn0000492
AmiGO	FBgn0039019	HP1c	HP1c	CG6990	FBgn0039019
AmiGO	FBgn0266450	Kr	Kr-h1	CG45074	FBgn0266450
AmiGO	FBgn0027794	Lrpprc2	Lrpprc2	CG14786	FBgn0027794
AmiGO	FBgn0259139	glo	glo	CG6946	FBgn0259139
AmiGO	FBgn0002023	Lim3	Lim3	CG10699	FBgn0002023
AmiGO	FBgn0053834	His1	His1:CG33834	CG33834	FBgn0053834
AmiGO	FBgn0013746	alien	alien	CG9556	FBgn0013746
AmiGO	FBgn0003459	stwl	stwl	CG3836	FBgn0003459
AmiGO	FBgn0037703	JHDM2	JHDM2	CG8165	FBgn0037703
AmiGO	FBgn0263738	Ada2a	Ada2a	CG43663	FBgn0263738
AmiGO	FBgn0053855	His1	His1:CG33855	CG33855	FBgn0053855
AmiGO	FBgn0053807	His1	His1:CG33807	CG33807	FBgn0053807
AmiGO	FBgn0053801	His1	His1:CG33801	CG33801	FBgn0053801
AmiGO	FBgn0025716	Bap55	Bap55	CG6546	FBgn0025716
AmiGO	FBgn0011236	ken	ken	CG5575	FBgn0011236
AmiGO	FBgn0031604	Elp3	Elp3	CG15433	FBgn0031604
AmiGO	FBgn0038252	BigH1	BigH1	CG3509	FBgn0038252
AmiGO	FBgn0260400	elav	elav	CG4262	FBgn0260400
AmiGO	FBgn0029867	CG3847	CG3847	CG3847	FBgn0029867
AmiGO	FBgn0037857	Tengl4	Tengl4	CG4683	FBgn0037857
AmiGO	FBgn0004903	Rb97D	Rb97D	CG6354	FBgn0004903
AmiGO	FBgn0051682	Tengl1	Tengl1	CG31682	FBgn0051682
AmiGO	FBgn0051679	Tengl3	Tengl3	CG31679	FBgn0051679
AmiGO	FBgn0036321	CG14120	CG14120	CG14120	FBgn0036321
AmiGO	FBgn0036497	Ran	Ran-like	CG7815	FBgn0036497
AmiGO	FBgn0266284	Ns3	Ns3	CG14788	FBgn0266284
AmiGO	FBgn0036330	CG11263	CG11263	CG11263	FBgn0036330
AmiGO	FBgn0036323	CG14118	CG14118	CG14118	FBgn0036323
AmiGO	FBgn0036317	CG10948	CG10948	CG10948	FBgn0036317
AmiGO	FBgn0260634	eIF4G2	eIF4G2	CG10192	FBgn0260634
AmiGO	FBgn0034118	Nup62	Nup62	CG6251	FBgn0034118
AmiGO	FBgn0039622	eIF4E6	eIF4E6	CG1442	FBgn0039622
AmiGO	FBgn0039593	Sid	Sid	CG9989	FBgn0039593
AmiGO	FBgn0039592	CG14062	CG14062	CG14062	FBgn0039592
AmiGO	FBgn0262647	Nup160	Nup160	CG4738	FBgn0262647
AmiGO	FBgn0039557	CG12259	CG12259	CG12259	FBgn0039557
AmiGO	FBgn0262456	mir	mir-125	CR43029	FBgn0262456
AmiGO	FBgn0026573	ADD1	ADD1	CG8290	FBgn0026573
AmiGO	FBgn0052463	Tengl2	Tengl2	CG32463	FBgn0052463
AmiGO	FBgn0036833	CG3819	CG3819	CG3819	FBgn0036833
AmiGO	FBgn0036831	CG6839	CG6839	CG6839	FBgn0036831
AmiGO	FBgn0021750	SerRS	SerRS-m	CG4938	FBgn0021750
AmiGO	FBgn0275436	PheRS	PheRS-m	CG13348	FBgn0275436
AmiGO	FBgn0027334	l	l(1)G0004	CG11738	FBgn0027334
AmiGO	FBgn0035121	Tudor	Tudor-SN	CG7008	FBgn0035121
AmiGO	FBgn0035064	TyrRS	TyrRS-m	CG16912	FBgn0035064
AmiGO	FBgn0033490	CG12917	CG12917	CG12917	FBgn0033490
AmiGO	FBgn0263107	mir	mir-bft	CR42938	FBgn0263107
AmiGO	FBgn0028397	Tob	Tob	CG9214	FBgn0028397
AmiGO	FBgn0031603	CG15432	CG15432	CG15432	FBgn0031603
AmiGO	FBgn0053346	CG33346	CG33346	CG33346	FBgn0053346
AmiGO	FBgn0053172	CG33172	CG33172	CG33172	FBgn0053172
AmiGO	FBgn0031361	Dmel	CG17652	CG17652	FBgn0031361
AmiGO	FBgn0003964	usp	usp	CG4380	FBgn0003964
AmiGO	FBgn0034643	CG10321	CG10321	CG10321	FBgn0034643
AmiGO	FBgn0039120	Nup98	Nup98-96	CG10198	FBgn0039120
AmiGO	FBgn0004595	pros	pros	CG17228	FBgn0004595
AmiGO	FBgn0262477	FoxP	FoxP	CG43067	FBgn0262477
AmiGO	FBgn0040075	rept	rept	CG9750	FBgn0040075
AmiGO	FBgn0038868	CG5862	CG5862	CG5862	FBgn0038868
AmiGO	FBgn0003870	ttk	ttk	CG1856	FBgn0003870
AmiGO	FBgn0030206	CG2889	CG2889	CG2889	FBgn0030206
AmiGO	FBgn0287186	scro	scro	CG17594	FBgn0287186
AmiGO	FBgn0030455	CG4318	CG4318	CG4318	FBgn0030455
AmiGO	FBgn0261238	Alh	Alh	CG1070	FBgn0261238
AmiGO	FBgn0020379	Rfx	Rfx	CG6312	FBgn0020379
AmiGO	FBgn0014026	RpL7A	RpL7A	CG3314	FBgn0014026
AmiGO	FBgn0029785	RpL35	RpL35	CG4111	FBgn0029785
AmiGO	FBgn0034933	Dmel	CG3735	CG3735	FBgn0034933
AmiGO	FBgn0034918	Pym	Pym	CG30176	FBgn0034918
AmiGO	FBgn0034743	RpS16	RpS16	CG4046	FBgn0034743
AmiGO	FBgn0029992	Upf2	Upf2	CG2253	FBgn0029992
AmiGO	FBgn0000659	fkh	fkh	CG10002	FBgn0000659
AmiGO	FBgn0032404	RpL7	RpL7-like	CG5317	FBgn0032404
AmiGO	FBgn0005696	PolA2	PolA2	CG5923	FBgn0005696
AmiGO	FBgn0032138	CG4364	CG4364	CG4364	FBgn0032138
AmiGO	FBgn0026196	nop5	nop5	CG10206	FBgn0026196
AmiGO	FBgn0032408	CG6712	CG6712	CG6712	FBgn0032408
AmiGO	FBgn0036213	RpL10Ab	RpL10Ab	CG7283	FBgn0036213
AmiGO	FBgn0038597	Dmel	CG8064	CG8064	FBgn0038597
AmiGO	FBgn0002069	AspRS	AspRS	CG3821	FBgn0002069
AmiGO	FBgn0010926	l	l(3)07882	CG5824	FBgn0010926
AmiGO	FBgn0005593	RpL7	RpL7	CG4897	FBgn0005593
AmiGO	FBgn0030081	dUTP6	CG7246	CG7246	FBgn0030081
AmiGO	FBgn0030061	CG1785	CG1785	CG1785	FBgn0030061
AmiGO	FBgn0030007	alpha	alpha-PheRS	CG2263	FBgn0030007
AmiGO	FBgn0003655	swa	swa	CG3429	FBgn0003655
AmiGO	FBgn0260859	Bet3	Bet3	CG3911	FBgn0260859
AmiGO	FBgn0037621	M1BP	M1BP	CG9797	FBgn0037621
AmiGO	FBgn0037566	mRpL1	mRpL1	CG7494	FBgn0037566
AmiGO	FBgn0033889	CG6701	CG6701	CG6701	FBgn0033889
AmiGO	FBgn0263351	AP	AP-2mu	CG7057	FBgn0263351
AmiGO	FBgn0038989	CG6937	CG6937	CG6937	FBgn0038989
AmiGO	FBgn0085424	nub	nub	CG34395	FBgn0085424
AmiGO	FBgn0038585	Non3	Non3	CG7993	FBgn0038585
AmiGO	FBgn0027080	TyrRS	TyrRS	CG4561	FBgn0027080
AmiGO	FBgn0031497	SerRS	SerRS	CG17259	FBgn0031497
AmiGO	FBgn0038168	omd	omd	CG9591	FBgn0038168
AmiGO	FBgn0037347	SecS	SecS	CG1427	FBgn0037347
AmiGO	FBgn0027091	CysRS	CysRS	CG8431	FBgn0027091
AmiGO	FBgn0038281	RpL10Aa	RpL10Aa	CG3843	FBgn0038281
AmiGO	FBgn0003944	Ubx	Ubx	CG10388	FBgn0003944
AmiGO	FBgn0086655	jing	jing	CG9397	FBgn0086655
AmiGO	FBgn0014340	mof	mof	CG3025	FBgn0014340
AmiGO	FBgn0024509	Sec13	Sec13	CG6773	FBgn0024509
AmiGO	FBgn0262582	cic	cic	CG43122	FBgn0262582
AmiGO	FBgn0000022	ac	ac	CG3796	FBgn0000022
AmiGO	FBgn0037728	p23	p23	CG16817	FBgn0037728
AmiGO	FBgn0037653	Iru	Iru	CG11982	FBgn0037653
AmiGO	FBgn0010433	ato	ato	CG7508	FBgn0010433
AmiGO	FBgn0013469	klu	klu	CG12296	FBgn0013469
AmiGO	FBgn0001319	kn	kn	CG10197	FBgn0001319
AmiGO	FBgn0020496	CtBP	CtBP	CG7583	FBgn0020496
AmiGO	FBgn0037345	PolZ2	PolZ2	CG2948	FBgn0037345
AmiGO	FBgn0260397	Su	Su(var)3-3	CG17149	FBgn0260397
AmiGO	FBgn0027835	Dp1	Dp1	CG5170	FBgn0027835
AmiGO	FBgn0036239	Pop2	Pop2	CG5684	FBgn0036239
AmiGO	FBgn0015521	RpS21	RpS21	CG2986	FBgn0015521
AmiGO	FBgn0261850	Xpd	Xpd	CG9433	FBgn0261850
AmiGO	FBgn0263979	Caf1	Caf1-55	CG4236	FBgn0263979
AmiGO	FBgn0011604	Iswi	Iswi	CG8625	FBgn0011604
AmiGO	FBgn0004198	ct	ct	CG11387	FBgn0004198
AmiGO	FBgn0000588	esc	esc	CG14941	FBgn0000588
AmiGO	FBgn0004872	piwi	piwi	CG6122	FBgn0004872
AmiGO	FBgn0016034	mael	mael	CG11254	FBgn0016034
AmiGO	FBgn0000541	E	E(bx)	CG32346	FBgn0000541
AmiGO	FBgn0039227	polybromo	polybromo	CG11375	FBgn0039227
AmiGO	FBgn0034975	enok	enok	CG11290	FBgn0034975
AmiGO	FBgn0037384	dgrn	dgrn	CG10981	FBgn0037384
AmiGO	FBgn0026080	Tip60	Tip60	CG6121	FBgn0026080
AmiGO	FBgn0043884	mask	mask	CG33106	FBgn0043884
AmiGO	FBgn0261823	Asx	Asx	CG8787	FBgn0261823
AmiGO	FBgn0028387	chm	chm	CG5229	FBgn0028387
AmiGO	FBgn0025825	HDAC3	HDAC3	CG2128	FBgn0025825
AmiGO	FBgn0003975	vg	vg	CG3830	FBgn0003975
AmiGO	FBgn0002775	msl	msl-3	CG8631	FBgn0002775
AmiGO	FBgn0039270	PQBP1	PQBP1	CG11820	FBgn0039270
AmiGO	FBgn0000251	cad	cad	CG1759	FBgn0000251
AmiGO	FBgn0283682	Ge	Ge-1	CG6181	FBgn0283682
AmiGO	FBgn0001325	Kr	Kr	CG3340	FBgn0001325
AmiGO	FBgn0001169	H	H	CG5460	FBgn0001169
AmiGO	FBgn0038251	Hexim	Hexim	CG3508	FBgn0038251
AmiGO	FBgn0037248	srl	srl	CG9809	FBgn0037248
AmiGO	FBgn0015664	Dref	Dref	CG5838	FBgn0015664
AmiGO	FBgn0046214	vig2	vig2	CG11844	FBgn0046214
AmiGO	FBgn0023214	edl	edl	CG15085	FBgn0023214
AmiGO	FBgn0000117	arm	arm	CG11579	FBgn0000117
AmiGO	FBgn0000546	EcR	EcR	CG1765	FBgn0000546
AmiGO	FBgn0014018	Rel	Rel	CG11992	FBgn0014018
AmiGO	FBgn0260749	Utx	Utx	CG5640	FBgn0260749
AmiGO	FBgn0001291	Jra	Jra	CG2275	FBgn0001291
AmiGO	FBgn0015799	Rbf	Rbf	CG7413	FBgn0015799
AmiGO	FBgn0002962	nos	nos	CG5637	FBgn0002962
AmiGO	FBgn0027537	Nup93	Nup93-1	CG11092	FBgn0027537
AmiGO	FBgn0003513	ss	ss	CG6993	FBgn0003513
AmiGO	FBgn0263667	Lpt	Lpt	CG5591	FBgn0263667
AmiGO	FBgn0038197	foxo	foxo	CG3143	FBgn0038197
AmiGO	FBgn0000097	aop	aop	CG3166	FBgn0000097
AmiGO	FBgn0013756	Mtor	Mtor	CG8274	FBgn0013756
AmiGO	FBgn0016917	Stat92E	Stat92E	CG4257	FBgn0016917
AmiGO	FBgn0025800	Smox	Smox	CG2262	FBgn0025800
AmiGO	FBgn0039044	p53	p53	CG33336	FBgn0039044
AmiGO	FBgn0038826	Syp	Syp	CG17838	FBgn0038826
AmiGO	FBgn0086706	pix	pix	CG5651	FBgn0086706
AmiGO	FBgn0264495	gpp	gpp	CG42803	FBgn0264495
AmiGO	FBgn0034646	Rae1	Rae1	CG9862	FBgn0034646
AmiGO	FBgn0259785	pzg	pzg	CG7752	FBgn0259785
AmiGO	FBgn0000575	emc	emc	CG1007	FBgn0000575
AmiGO	FBgn0041205	key	key	CG16910	FBgn0041205
AmiGO	FBgn0022764	Sin3A	Sin3A	CG8815	FBgn0022764
AmiGO	FBgn0262519	Mi	Mi-2	CG8103	FBgn0262519
AmiGO	FBgn0262411	mir	mir-92a	CR42955	FBgn0262411
AmiGO	FBgn0000018	abo	abo	CG6093	FBgn0000018
AmiGO	FBgn0003068	per	per	CG2647	FBgn0003068
AmiGO	FBgn0033402	Myd88	Myd88	CG2078	FBgn0033402
AmiGO	FBgn0085450	Snoo	Snoo	CG34421	FBgn0085450
AmiGO	FBgn0015550	tap	tap	CG7659	FBgn0015550
AmiGO	FBgn0025702	Srpk79D	Srpk79D	CG11489	FBgn0025702
AmiGO	FBgn0261573	CoRest	CoRest	CG42687	FBgn0261573
AmiGO	FBgn0011206	bol	bol	CG4760	FBgn0011206
AmiGO	FBgn0051992	gw	gw	CG31992	FBgn0051992
AmiGO	FBgn0005427	ewg	ewg	CG3114	FBgn0005427
AmiGO	FBgn0038815	CG5466	CG5466	CG5466	FBgn0038815
AmiGO	FBgn0020887	Su	Su(z)12	CG8013	FBgn0020887
AmiGO	FBgn0034422	CG7137	CG7137	CG7137	FBgn0034422
AmiGO	FBgn0262527	nsl1	nsl1	CG4699	FBgn0262527
AmiGO	FBgn0039904	Hcf	Hcf	CG1710	FBgn0039904
AmiGO	FBgn0029895	CG14441	CG14441	CG14441	FBgn0029895
AmiGO	FBgn0022786	Hira	Hira	CG12153	FBgn0022786
AmiGO	FBgn0034763	RYBP	RYBP	CG12190	FBgn0034763
AmiGO	FBgn0002781	mod	mod(mdg4)	CG32491	FBgn0002781
AmiGO	FBgn0039217	CG13627	CG13627	CG13627	FBgn0039217
AmiGO	FBgn0032475	Sfmbt	Sfmbt	CG16975	FBgn0032475
AmiGO	FBgn0262166	calypso	calypso	CG8445	FBgn0262166
AmiGO	FBgn0027620	Acf	Acf	CG1966	FBgn0027620
AmiGO	FBgn0266570	NO66	NO66	CG2982	FBgn0266570
AmiGO	FBgn0004878	cas	cas	CG2102	FBgn0004878
AmiGO	FBgn0037675	HP1e	HP1e	CG8120	FBgn0037675
AmiGO	FBgn0266420	Ote	Ote	CG5581	FBgn0266420
AmiGO	FBgn0004652	fru	fru	CG14307	FBgn0004652
AmiGO	FBgn0026143	Cdc45	Cdc45	CG3658	FBgn0026143
AmiGO	FBgn0036248	ssp	ssp	CG17153	FBgn0036248
AmiGO	FBgn0027950	MBD	MBD-like	CG8208	FBgn0027950
AmiGO	FBgn0010313	corto	corto	CG2530	FBgn0010313
AmiGO	FBgn0005624	Psc	Psc	CG3886	FBgn0005624
AmiGO	FBgn0011785	BRWD3	BRWD3	CG31132	FBgn0011785
AmiGO	FBgn0000227	Bsg25A	Bsg25A	CG12205	FBgn0000227
AmiGO	FBgn0037670	Ibf1	Ibf1	CG8436	FBgn0037670
AmiGO	FBgn0005771	noc	noc	CG4491	FBgn0005771
AmiGO	FBgn0004858	elB	elB	CG4220	FBgn0004858
AmiGO	FBgn0003044	Pcl	Pcl	CG5109	FBgn0003044
AmiGO	FBgn0003042	Pc	Pc	CG32443	FBgn0003042
AmiGO	FBgn0003334	Scm	Scm	CG9495	FBgn0003334
AmiGO	FBgn0013717	not	not	CG4166	FBgn0013717
AmiGO	FBgn0001197	His2Av	His2Av	CG5499	FBgn0001197
AmiGO	FBgn0031655	Marcal1	Marcal1	CG3753	FBgn0031655
AmiGO	FBgn0025682	scf	scf	CG9148	FBgn0025682
AmiGO	FBgn0025680	cry	cry	CG3772	FBgn0025680
AmiGO	FBgn0037008	mTerf3	mTerf3	CG5047	FBgn0037008
AmiGO	FBgn0040477	cid	cid	CG13329	FBgn0040477
AmiGO	FBgn0265598	Bx	Bx	CG44425	FBgn0265598
AmiGO	FBgn0016687	Nurf	Nurf-38	CG4634	FBgn0016687
AmiGO	FBgn0020279	lig	lig	CG8715	FBgn0020279
AmiGO	FBgn0026206	mei	mei-P26	CG12218	FBgn0026206
AmiGO	FBgn0039175	beta	beta-PheRS	CG5706	FBgn0039175
AmiGO	FBgn0037883	Dph3	Dph3	CG14701	FBgn0037883
AmiGO	FBgn0036763	TrpRS	TrpRS-m	CG7441	FBgn0036763
AmiGO	FBgn0036629	GluRS	GluRS-m	CG4573	FBgn0036629
AmiGO	FBgn0036569	IleRS	IleRS-m	CG5414	FBgn0036569
AmiGO	FBgn0004404	RpS14b	RpS14b	CG1527	FBgn0004404
AmiGO	FBgn0004403	RpS14a	RpS14a	CG1524	FBgn0004403
AmiGO	FBgn0011787	mRpL12	mRpL12	CG5012	FBgn0011787
AmiGO	FBgn0087040	alphaTub67C	alphaTub67C	CG8308	FBgn0087040
AmiGO	FBgn0038474	mRpS11	mRpS11	CG5184	FBgn0038474
AmiGO	FBgn0027086	IleRS	IleRS	CG11471	FBgn0027086
AmiGO	FBgn0027084	LysRS	LysRS	CG12141	FBgn0027084
AmiGO	FBgn0026259	eIF5B	eIF5B	CG10840	FBgn0026259
AmiGO	FBgn0034012	Hr51	Hr51	CG16801	FBgn0034012
AmiGO	FBgn0000015	Abd	Abd-B	CG11648	FBgn0000015
AmiGO	FBgn0015805	HDAC1	HDAC1	CG7471	FBgn0015805
AmiGO	FBgn0033690	EndoG	EndoG	CG8862	FBgn0033690
AmiGO	FBgn0263995	cpo	cpo	CG43738	FBgn0263995
AmiGO	FBgn0265089	eIF4E3	eIF4E3	CG8023	FBgn0265089
AmiGO	FBgn0034570	CG10543	CG10543	CG10543	FBgn0034570
AmiGO	FBgn0039868	CG11563	CG11563	CG11563	FBgn0039868
AmiGO	FBgn0034217	Lhr	Lhr	CG18468	FBgn0034217
AmiGO	FBgn0264691	Lst8	Lst8	CG3004	FBgn0264691
AmiGO	FBgn0264503	CG15311	CG43902	CG43902	FBgn0264503
AmiGO	FBgn0039233	CG7006	CG7006	CG7006	FBgn0039233
AmiGO	FBgn0017550	Rga	Rga	CG2161	FBgn0017550
AmiGO	FBgn0037901	Exd2	Exd2	CG6744	FBgn0037901
AmiGO	FBgn0262178	mir	mir-981	CR42885	FBgn0262178
AmiGO	FBgn0037828	tomboy20	tomboy20	CG14690	FBgn0037828
AmiGO	FBgn0026427	Su	Su(var)2-HP2	CG12864	FBgn0026427
AmiGO	FBgn0031077	THADA	THADA	CG15618	FBgn0031077
AmiGO	FBgn0036398	upSET	upSET	CG9007	FBgn0036398
AmiGO	FBgn0266053	Patr	Patr-1	CG5208	FBgn0266053
AmiGO	FBgn0027885	Aac11	cass	CG6582	FBgn0286781
AmiGO	FBgn0027951	MTA1	MTA1-like	CG2244	FBgn0027951
AmiGO	FBgn0262404	mir	mir-996	CR42947	FBgn0262404
AmiGO	FBgn0036964	FRG1	FRG1	CG6480	FBgn0036964
AmiGO	FBgn0036928	Tom20	Tom20	CG7654	FBgn0036928
AmiGO	FBgn0035336	CG9004	CG9004	CG9004	FBgn0035336
AmiGO	FBgn0037610	CG8043	CG8043	CG8043	FBgn0037610
AmiGO	FBgn0030874	Spt7	Spt7	CG6506	FBgn0030874
AmiGO	FBgn0035047	Pof	Pof	CG3691	FBgn0035047
AmiGO	FBgn0038964	Nop56	Nop56	CG13849	FBgn0038964
AmiGO	FBgn0028411	Nxt1	Nxt1	CG12752	FBgn0028411
AmiGO	FBgn0033029	Not3	Not3	CG8426	FBgn0033029
AmiGO	FBgn0031782	WDR79	WDR79	CG9226	FBgn0031782
AmiGO	FBgn0020261	pcm	pcm	CG3291	FBgn0020261
AmiGO	FBgn0020497	emb	emb	CG13387	FBgn0020497
AmiGO	FBgn0020255	Ran	Ran	CG1404	FBgn0020255
AmiGO	FBgn0026207	mbo	mbo	CG6819	FBgn0026207
AmiGO	FBgn0041164	armi	armi	CG11513	FBgn0041164
AmiGO	FBgn0028991	seq	seq	CG32904	FBgn0028991
AmiGO	FBgn0027574	CG5815	CG5815	CG5815	FBgn0027574
AmiGO	FBgn0014396	tim	tim	CG3234	FBgn0014396
AmiGO	FBgn0019686	lok	lok	CG10895	FBgn0019686
AmiGO	FBgn0005677	dac	dac	CG4952	FBgn0005677
AmiGO	FBgn0266557	kis	kis	CG3696	FBgn0266557
AmiGO	FBgn0026428	HDAC6	HDAC6	CG6170	FBgn0026428
AmiGO	FBgn0026401	Nipped	Nipped-B	CG17704	FBgn0026401
AmiGO	FBgn0030943	Nup35	Nup35	CG6540	FBgn0030943
AmiGO	FBgn0041156	exex	exex	CG8254	FBgn0041156
AmiGO	FBgn0034051	Mlf	Mlf	CG8295	FBgn0034051
AmiGO	FBgn0039559	NSD	NSD	CG4976	FBgn0039559
AmiGO	FBgn0262473	Tl	Tl	CG5490	FBgn0262473
AmiGO	FBgn0039286	dan	dan	CG11849	FBgn0039286
AmiGO	FBgn0039283	danr	danr	CG13651	FBgn0039283
AmiGO	FBgn0033884	CG13344	CG13344	CG13344	FBgn0033884
AmiGO	FBgn0008651	lbl	lbl	CG6570	FBgn0008651
AmiGO	FBgn0003607	Su	Su(var)205	CG8409	FBgn0003607
AmiGO	FBgn0023518	trr	trr	CG3848	FBgn0023518
AmiGO	FBgn0011763	Dp	Dp	CG4654	FBgn0011763
AmiGO	FBgn0011715	Snr1	Snr1	CG1064	FBgn0011715
AmiGO	FBgn0283473	S6KL	S6KL	CG7001	FBgn0283473
AmiGO	FBgn0015268	Nap1	Nap1	CG5330	FBgn0015268
AmiGO	FBgn0038402	Fer2	Fer2	CG5952	FBgn0038402
AmiGO	FBgn0020388	Gcn5	Gcn5	CG4107	FBgn0020388
AmiGO	FBgn0030530	jub	jub	CG11063	FBgn0030530
AmiGO	FBgn0005355	Su	Su(fu)	CG6054	FBgn0005355
AmiGO	FBgn0001297	kay	kay	CG33956	FBgn0001297
AmiGO	FBgn0033661	CG13185	CG13185	CG13185	FBgn0033661
AmiGO	FBgn0053909	His4	His4:CG33909	CG33909	FBgn0053909
AmiGO	FBgn0263974	qin	qin	CG43726	FBgn0263974
AmiGO	FBgn0051739	AspRS	AspRS-m	CG31739	FBgn0051739
AmiGO	FBgn0034401	MetRS	MetRS	CG15100	FBgn0034401
AmiGO	FBgn0029629	eIF3g1	eIF3g1	CG8636	FBgn0029629
AmiGO	FBgn0034258	eIF3c	eIF3c	CG4954	FBgn0034258
AmiGO	FBgn0029878	Pat1	Pat1	CG10695	FBgn0029878
AmiGO	FBgn0034177	AsnRS	AsnRS-m	CG6796	FBgn0034177
AmiGO	FBgn0036035	CG18178	CG18178	CG18178	FBgn0036035
AmiGO	FBgn0034858	eIF2Bdelta	eIF2Bdelta	CG10315	FBgn0034858
AmiGO	FBgn0034802	CNBP	CNBP	CG3800	FBgn0034802
AmiGO	FBgn0034654	eIF3k	eIF3k	CG10306	FBgn0034654
AmiGO	FBgn0037994	eIF3d2	eIF3d2	CG4810	FBgn0037994
AmiGO	FBgn0010747	Srp54k	Srp54k	CG4659	FBgn0010747
AmiGO	FBgn0027619	eIF3j	eIF3j	CG12131	FBgn0027619
AmiGO	FBgn0051611	His4	His4:CG31611	CG31611	FBgn0051611
AmiGO	FBgn0036258	eIF3l	eIF3l	CG5642	FBgn0036258
AmiGO	FBgn0032646	mEFTs	mEFTs	CG6412	FBgn0032646
AmiGO	FBgn0086443	AsnRS	AsnRS	CG10687	FBgn0086443
AmiGO	FBgn0029176	eEF1gamma	eEF1gamma	CG11901	FBgn0029176
AmiGO	FBgn0037526	ArgRS	ArgRS-m	CG10092	FBgn0037526
AmiGO	FBgn0015834	eIF3i	eIF3i	CG8882	FBgn0015834
AmiGO	FBgn0030660	CG8097	CG8097	CG8097	FBgn0030660
AmiGO	FBgn0013981	His4r	His4r	CG3379	FBgn0013981
AmiGO	FBgn0040227	eIF3d1	eIF3d1	CG10161	FBgn0040227
AmiGO	FBgn0035499	Chd64	Chd64	CG14996	FBgn0035499
AmiGO	FBgn0053891	His4	His4:CG33891	CG33891	FBgn0053891
AmiGO	FBgn0028744	CG5033	CG5033	CG5033	FBgn0028744
AmiGO	FBgn0032198	eEF1delta	eEF1delta	CG4912	FBgn0032198
AmiGO	FBgn0010488	NAT1	NAT1	CG3845	FBgn0010488
AmiGO	FBgn0020660	eIF4B	eIF4B	CG10837	FBgn0020660
AmiGO	FBgn0033900	CysRS	CysRS-m	CG8257	FBgn0033900
AmiGO	FBgn0035016	CG4612	CG4612	CG4612	FBgn0035016
AmiGO	FBgn0013269	Fkbp39	Fkbp39	CG6226	FBgn0013269
AmiGO	FBgn0087039	Sbp2	Sbp2	CG7066	FBgn0087039
AmiGO	FBgn0053907	His4	His4:CG33907	CG33907	FBgn0053907
AmiGO	FBgn0053905	His4	His4:CG33905	CG33905	FBgn0053905
AmiGO	FBgn0053903	His4	His4:CG33903	CG33903	FBgn0053903
AmiGO	FBgn0053901	His4	His4:CG33901	CG33901	FBgn0053901
AmiGO	FBgn0028737	eEF1beta	eEF1beta	CG6341	FBgn0028737
AmiGO	FBgn0053899	His4	His4:CG33899	CG33899	FBgn0053899
AmiGO	FBgn0053897	His4	His4:CG33897	CG33897	FBgn0053897
AmiGO	FBgn0053895	His4	His4:CG33895	CG33895	FBgn0053895
AmiGO	FBgn0053893	His4	His4:CG33893	CG33893	FBgn0053893
AmiGO	FBgn0053889	His4	His4:CG33889	CG33889	FBgn0053889
AmiGO	FBgn0053887	His4	His4:CG33887	CG33887	FBgn0053887
AmiGO	FBgn0053885	His4	His4:CG33885	CG33885	FBgn0053885
AmiGO	FBgn0053883	His4	His4:CG33883	CG33883	FBgn0053883
AmiGO	FBgn0053881	His4	His4:CG33881	CG33881	FBgn0053881
AmiGO	FBgn0053879	His4	His4:CG33879	CG33879	FBgn0053879
AmiGO	FBgn0053877	His4	His4:CG33877	CG33877	FBgn0053877
AmiGO	FBgn0053875	His4	His4:CG33875	CG33875	FBgn0053875
AmiGO	FBgn0053873	His4	His4:CG33873	CG33873	FBgn0053873
AmiGO	FBgn0053871	His4	His4:CG33871	CG33871	FBgn0053871
AmiGO	FBgn0053869	His4	His4:CG33869	CG33869	FBgn0053869
AmiGO	FBgn0038796	eIF3g2	eIF3g2	CG10881	FBgn0038796
AmiGO	FBgn0031643	CG3008	CG3008	CG3008	FBgn0031643
AmiGO	FBgn0025582	eIF3e	eIF3e	CG9677	FBgn0025582
AmiGO	FBgn0015298	Srp19	Srp19	CG4457	FBgn0015298
AmiGO	FBgn0035947	Srp68	Srp68	CG5064	FBgn0035947
AmiGO	FBgn0051957	CG31957	CG31957	CG31957	FBgn0051957
AmiGO	FBgn0027093	ArgRS	ArgRS	CG9020	FBgn0027093
AmiGO	FBgn0027087	HisRS	HisRS	CG6335	FBgn0027087
AmiGO	FBgn0027081	ThrRS	ThrRS	CG5353	FBgn0027081
AmiGO	FBgn0003978	vls	vls	CG10728	FBgn0003978
AmiGO	FBgn0002783	mor	mor	CG18740	FBgn0002783
AmiGO	FBgn0037555	Ada2b	Ada2b	CG9638	FBgn0037555
AmiGO	FBgn0005617	msl	msl-1	CG10385	FBgn0005617
AmiGO	FBgn0040078	pont	pont	CG4003	FBgn0040078
AmiGO	FBgn0000139	ash2	ash2	CG6677	FBgn0000139
AmiGO	FBgn0030891	Ada3	Ada3	CG7098	FBgn0030891
AmiGO	FBgn0003015	osk	osk	CG10901	FBgn0003015
AmiGO	FBgn0263102	psq	psq	CG2368	FBgn0263102
AmiGO	FBgn0261885	osa	osa	CG7467	FBgn0261885
AmiGO	FBgn0025674	CycK	CycK	CG15218	FBgn0025674
AmiGO	FBgn0020412	JIL	JIL-1	CG6297	FBgn0020412
AmiGO	FBgn0042085	Bap170	Bap170	CG3274	FBgn0042085
AmiGO	FBgn0000562	egl	egl	CG4051	FBgn0000562
AmiGO	FBgn0000543	ecd	ecd	CG5714	FBgn0000543
AmiGO	FBgn0260780	wisp	wisp	CG15737	FBgn0260780
AmiGO	FBgn0011725	twin	twin	CG31137	FBgn0011725
AmiGO	FBgn0031317	Charon	Charon	CG5118	FBgn0031317
AmiGO	FBgn0003053	peb	peb	CG12212	FBgn0003053
AmiGO	FBgn0261617	nej	nej	CG15319	FBgn0261617
AmiGO	FBgn0034970	yki	yki	CG4005	FBgn0034970
AmiGO	FBgn0036641	Smn	Smn	CG16725	FBgn0036641
AmiGO	FBgn0284220	Top2	Top2	CG10223	FBgn0284220
AmiGO	FBgn0003612	Su	Su(var)2-10	CG8068	FBgn0003612
AmiGO	FBgn0265998	Doa	Doa	CG42320	FBgn0265998
AmiGO	FBgn0020306	dom	dom	CG9696	FBgn0020306
AmiGO	FBgn0034072	Dg	Dg	CG18250	FBgn0034072
AmiGO	FBgn0000320	eya	eya	CG9554	FBgn0000320
AmiGO	FBgn0000212	brm	brm	CG5942	FBgn0000212
AmiGO	FBgn0002566	lt	lt	CG18028	FBgn0002566
AmiGO	FBgn0034923	Upf3	Upf3	CG11184	FBgn0034923
AmiGO	FBgn0004407	PolG2	PolG2	CG33650	FBgn0004407
AmiGO	FBgn0037816	CG6345	CG6345	CG6345	FBgn0037816
AmiGO	FBgn0259113	PolA1	PolA1	CG6349	FBgn0259113
AmiGO	FBgn0086371	poly	poly	CG9829	FBgn0086371
AmiGO	FBgn0000115	Arl1	Arl1	CG6025	FBgn0000115
AmiGO	FBgn0001218	Hsc70	Hsc70-3	CG4147	FBgn0001218
AmiGO	FBgn0030276	Dlic	Dlic	CG1938	FBgn0030276
AmiGO	FBgn0031637	mxt	mxt	CG2950	FBgn0031637
AmiGO	FBgn0027088	GlyRS	GlyRS	CG6778	FBgn0027088
AmiGO	FBgn0032261	CG6094	CG6094	CG6094	FBgn0032261
AmiGO	FBgn0263986	cd	cd	CG6969	FBgn0263986
AmiGO	FBgn0000247	ca	ca	CG31037	FBgn0000247
AmiGO	FBgn0028734	Fmr1	Fmr1	CG6203	FBgn0028734
AmiGO	FBgn0028981	tRNA	tRNA:Ser-CGA-1-4	CR30224	FBgn0028981
AmiGO	FBgn0028912	tRNA	tRNA:Pro-AGG-1-2	CR31983	FBgn0028912
AmiGO	FBgn0028911	tRNA	tRNA:Pro-AGG-1-3	CR31979	FBgn0028911
AmiGO	FBgn0028910	tRNA	tRNA:Pro-AGG-1-4	CR31984	FBgn0028910
AmiGO	FBgn0028909	tRNA	tRNA:Gln-CTG-4-1	CR31838	FBgn0028909
AmiGO	FBgn0050257	tRNA	tRNA:Thr-TGT-2-1	CR30257	FBgn0050257
AmiGO	FBgn0050251	tRNA	tRNA:His-GTG-1-3	CR30251	FBgn0050251
AmiGO	FBgn0050250	tRNA	tRNA:His-GTG-1-2	CR30250	FBgn0050250
AmiGO	FBgn0050249	tRNA	tRNA:His-GTG-1-1	CR30249	FBgn0050249
AmiGO	FBgn0050241	tRNA	tRNA:Leu-AAG-1-1	CR30241	FBgn0050241
AmiGO	FBgn0050237	tRNA	tRNA:Gln-CTG-1-1	CR30237	FBgn0050237
AmiGO	FBgn0050235	tRNA	tRNA:Leu-AAG-1-3	CR30235	FBgn0050235
AmiGO	FBgn0050234	tRNA	tRNA:Leu-AAG-1-2	CR30234	FBgn0050234
AmiGO	FBgn0050232	tRNA	tRNA:Ala-TGC-1-1	CR30232	FBgn0050232
AmiGO	FBgn0050229	tRNA	tRNA:Leu-AAG-1-4	CR30229	FBgn0050229
AmiGO	FBgn0050227	tRNA	tRNA:Trp-CCA-2-2	CR30227	FBgn0050227
AmiGO	FBgn0050225	tRNA	tRNA:Val-AAC-2-1	CR30225	FBgn0050225
AmiGO	FBgn0050223	tRNA	tRNA:His-GTG-1-5	CR30223	FBgn0050223
AmiGO	FBgn0050220	tRNA	tRNA:Glu-CTC-2-2	CR30220	FBgn0050220
AmiGO	FBgn0050218	tRNA	tRNA:iMet-CAT-1-2	CR30218	FBgn0050218
AmiGO	FBgn0050215	tRNA	tRNA:Ile-AAT-1-9	CR30215	FBgn0050215
AmiGO	FBgn0050212	tRNA	tRNA:Arg-CCT-1-2	CR30212	FBgn0050212
AmiGO	FBgn0050211	tRNA	tRNA:Trp-CCA-1-2	CR30211	FBgn0050211
AmiGO	FBgn0050209	tRNA	tRNA:Trp-CCA-2-6	CR30209	FBgn0050209
AmiGO	FBgn0050208	tRNA	tRNA:Trp-CCA-2-4	CR30208	FBgn0050208
AmiGO	FBgn0050202	tRNA	tRNA:Ser-TGA-2-1	CR30202	FBgn0050202
AmiGO	FBgn0050201	tRNA	tRNA:Ser-TGA-1-1	CR30201	FBgn0050201
AmiGO	FBgn0050200	tRNA	tRNA:Ala-CGC-1-3	CR30200	FBgn0050200
AmiGO	FBgn0011878	tRNA	tRNA:His-GTG-1-4	CR30252	FBgn0011878
AmiGO	FBgn0025118	tRNA	tRNA:Pro-CGG-3-1	CR32784	FBgn0025118
AmiGO	FBgn0052748	tRNA	tRNA:Phe-GAA-1-1	CR32748	FBgn0052748
AmiGO	FBgn0052740	tRNA	tRNA:Phe-GAA-1-2	CR32740	FBgn0052740
AmiGO	FBgn0029833	MCTS1	MCTS1	CG5941	FBgn0029833
AmiGO	FBgn0086710	RpL30	RpL30	CG10652	FBgn0086710
AmiGO	FBgn0019936	RpS20	RpS20	CG15693	FBgn0019936
AmiGO	FBgn0052128	tRNA	tRNA:Pro-AGG-1-6	CR32128	FBgn0052128
AmiGO	FBgn0034837	RpL22	RpL22-like	CG9871	FBgn0034837
AmiGO	FBgn0034822	RpL37b	RpL37b	CG9873	FBgn0034822
AmiGO	FBgn0029907	Atx	Atx-1	CG4547	FBgn0029907
AmiGO	FBgn0030616	RpL37a	RpL37a	CG9091	FBgn0030616
AmiGO	FBgn0039226	Ude	Ude	CG18410	FBgn0039226
AmiGO	FBgn0012028	tRNA	tRNA:Tyr-GTA-1-4	CR31387	FBgn0012028
AmiGO	FBgn0012027	tRNA	tRNA:Tyr-GTA-1-5	CR31552	FBgn0012027
AmiGO	FBgn0012025	tRNA	tRNA:Tyr-GTA-1-7	CR31433	FBgn0012025
AmiGO	FBgn0012024	tRNA	tRNA:Tyr-GTA-1-8	CR31435	FBgn0012024
AmiGO	FBgn0012017	tRNA	tRNA:Tyr-GTA-1-2	CR31986	FBgn0012017
AmiGO	FBgn0012010	tRNA	tRNA:Val-AAC-2-3	CR32124	FBgn0012010
AmiGO	FBgn0012009	tRNA	tRNA:Val-AAC-2-4	CR32122	FBgn0012009
AmiGO	FBgn0012001	tRNA	tRNA:Val-CAC-2-4	CR31502	FBgn0012001
AmiGO	FBgn0012000	tRNA	tRNA:Val-CAC-2-3	CR31500	FBgn0012000
AmiGO	FBgn0051215	tRNA	tRNA:Ala-AGC-2-11	CR31215	FBgn0051215
AmiGO	FBgn0010770	ppan	ppan	CG5786	FBgn0010770
AmiGO	FBgn0052826	tRNA	tRNA:Pro-CGG-1-1	CR32826	FBgn0052826
AmiGO	FBgn0051333	tRNA	tRNA:Thr-CGT-1-3	CR31333	FBgn0051333
AmiGO	FBgn0052785	tRNA	tRNA:Gln-CTG-2-1	CR32785	FBgn0052785
AmiGO	FBgn0052460	tRNA	tRNA:Glu-CTC-2-3	CR32460	FBgn0052460
AmiGO	FBgn0266574	tRNA	tRNA:Thr-TGT-2-4	CR45107	FBgn0266574
AmiGO	FBgn0266573	tRNA	tRNA:Thr-TGT-2-3	CR45106	FBgn0266573
AmiGO	FBgn0004861	ph	ph-p	CG18412	FBgn0004861
AmiGO	FBgn0027378	MRG15	MRG15	CG6363	FBgn0027378
AmiGO	FBgn0051669	tRNA	tRNA:Gln-CTG-2-5	CR31669	FBgn0051669
AmiGO	FBgn0051631	tRNA	tRNA:Arg-CCT-1-1	CR31631	FBgn0051631
AmiGO	FBgn0051602	tRNA	tRNA:Asp-GTC-1-6	CR31602	FBgn0051602
AmiGO	FBgn0051588	tRNA	tRNA:Phe-GAA-1-6	CR31588	FBgn0051588
AmiGO	FBgn0051583	tRNA	tRNA:Asn-GTT-1-10	CR31583	FBgn0051583
AmiGO	FBgn0051579	tRNA	tRNA:Ala-AGC-2-7	CR31579	FBgn0051579
AmiGO	FBgn0051578	tRNA	tRNA:Pro-TGG-1-4	CR31578	FBgn0051578
AmiGO	FBgn0051577	tRNA	tRNA:Ala-AGC-1-1	CR31577	FBgn0051577
AmiGO	FBgn0051576	tRNA	tRNA:Ala-AGC-2-10	CR31576	FBgn0051576
AmiGO	FBgn0051575	tRNA	tRNA:Ala-AGC-2-9	CR31575	FBgn0051575
AmiGO	FBgn0051568	tRNA	tRNA:Ala-AGC-2-6	CR31568	FBgn0051568
AmiGO	FBgn0051506	tRNA	tRNA:Leu-TAA-1-1	CR31506	FBgn0051506
AmiGO	FBgn0051497	tRNA	tRNA:Thr-AGT-1-3	CR31497	FBgn0051497
AmiGO	FBgn0051494	tRNA	tRNA:Gly-TCC-1-1	CR31494	FBgn0051494
AmiGO	FBgn0051383	tRNA	tRNA:Leu-TAG-1-1	CR31383	FBgn0051383
AmiGO	FBgn0051382	tRNA	tRNA:Asp-GTC-1-12	CR31382	FBgn0051382
AmiGO	FBgn0051356	tRNA	tRNA:Thr-TGT-1-1	CR31356	FBgn0051356
AmiGO	FBgn0051334	tRNA	tRNA:Thr-CGT-1-2	CR31334	FBgn0051334
AmiGO	FBgn0051331	tRNA	tRNA:Phe-GAA-1-7	CR31331	FBgn0051331
AmiGO	FBgn0026164	tRNA	tRNA:Lys-TTT-2-3	CR31489	FBgn0026164
AmiGO	FBgn0026163	tRNA	tRNA:Lys-TTT-2-2	CR31487	FBgn0026163
AmiGO	FBgn0026162	tRNA	tRNA:Lys-TTT-2-1	CR31490	FBgn0026162
AmiGO	FBgn0051282	tRNA	tRNA:Thr-AGT-1-4	CR31282	FBgn0051282
AmiGO	FBgn0051242	tRNA	tRNA:Gly-TCC-1-3	CR31242	FBgn0051242
AmiGO	FBgn0051228	tRNA	tRNA:Pro-TGG-1-5	CR31228	FBgn0051228
AmiGO	FBgn0012002	tRNA	tRNA:Val-CAC-1-1	CR31572	FBgn0012002
AmiGO	FBgn0012003	tRNA	tRNA:Val-CAC-2-5	CR31214	FBgn0012003
AmiGO	FBgn0012004	tRNA	tRNA:Val-CAC-2-6	CR31430	FBgn0012004
AmiGO	FBgn0012011	tRNA	tRNA:Val-AAC-1-1	CR31587	FBgn0012011
AmiGO	FBgn0012026	tRNA	tRNA:Tyr-GTA-1-6	CR31434	FBgn0012026
AmiGO	FBgn0051167	tRNA	tRNA:Ser-GCT-1-1	CR31167	FBgn0051167
AmiGO	FBgn0051166	tRNA	tRNA:Ser-GCT-2-5	CR31166	FBgn0051166
AmiGO	FBgn0051165	tRNA	tRNA:Ser-GCT-2-3	CR31165	FBgn0051165
AmiGO	FBgn0051162	tRNA	tRNA:Ser-GCT-2-4	CR31162	FBgn0051162
AmiGO	FBgn0051156	CG31156	CG31156	CG31156	FBgn0051156
AmiGO	FBgn0051143	tRNA	tRNA:Leu-CAA-2-3	CR31143	FBgn0051143
AmiGO	FBgn0051130	tRNA	tRNA:Leu-TAA-4-1	CR31130	FBgn0051130
AmiGO	FBgn0032929	Mcm10	Mcm10	CG9241	FBgn0032929
AmiGO	FBgn0262448	mir	mir-279	CR43015	FBgn0262448
AmiGO	FBgn0051070	tRNA	tRNA:Gln-TTG-1-3	CR31070	FBgn0051070
AmiGO	FBgn0051071	tRNA	tRNA:Gln-TTG-1-2	CR31071	FBgn0051071
AmiGO	FBgn0262373	mir	mir-9a	CR42891	FBgn0262373
AmiGO	FBgn0052493	tRNA	tRNA:Gln-TTG-2-1	CR32493	FBgn0052493
AmiGO	FBgn0052482	tRNA	tRNA:iMet-CAT-1-3	CR32482	FBgn0052482
AmiGO	FBgn0052481	tRNA	tRNA:Ile-TAT-1-2	CR32481	FBgn0052481
AmiGO	FBgn0052480	tRNA	tRNA:Ile-TAT-1-1	CR32480	FBgn0052480
AmiGO	FBgn0052449	tRNA	tRNA:Cys-GCA-4-1	CR32449	FBgn0052449
AmiGO	FBgn0052421	tRNA	tRNA:Val-TAC-1-2	CR32421	FBgn0052421
AmiGO	FBgn0052420	tRNA	tRNA:Val-TAC-1-1	CR32420	FBgn0052420
AmiGO	FBgn0051023	tRNA	tRNA:Leu-TAG-1-2	CR31023	FBgn0051023
AmiGO	FBgn0052272	tRNA	tRNA:Lys-CTT-1-13	CR32272	FBgn0052272
AmiGO	FBgn0052273	tRNA	tRNA:Met-CAT-2-1	CR32273	FBgn0052273
AmiGO	FBgn0052285	tRNA	tRNA:Lys-CTT-1-12	CR32285	FBgn0052285
AmiGO	FBgn0052287	tRNA	tRNA:Cys-GCA-1-3	CR32287	FBgn0052287
AmiGO	FBgn0051896	tRNA	tRNA:Asp-GTC-1-2	CR31896	FBgn0051896
AmiGO	FBgn0051895	tRNA	tRNA:Phe-GAA-1-3	CR31895	FBgn0051895
AmiGO	FBgn0051892	tRNA	tRNA:Asp-GTC-1-3	CR31892	FBgn0051892
AmiGO	FBgn0051890	tRNA	tRNA:Asp-GTC-1-8	CR31890	FBgn0051890
AmiGO	FBgn0051889	tRNA	tRNA:Asp-GTC-1-7	CR31889	FBgn0051889
AmiGO	FBgn0051888	tRNA	tRNA:Asp-GTC-1-9	CR31888	FBgn0051888
AmiGO	FBgn0051885	tRNA	tRNA:Thr-AGT-1-1	CR31885	FBgn0051885
AmiGO	FBgn0052303	tRNA	tRNA:Cys-GCA-3-1	CR32303	FBgn0052303
AmiGO	FBgn0052360	tRNA	tRNA:Leu-CAG-1-4	CR32360	FBgn0052360
AmiGO	FBgn0052363	tRNA	tRNA:Leu-CAG-1-7	CR32363	FBgn0052363
AmiGO	FBgn0042134	Capr	Capr	CG18811	FBgn0042134
AmiGO	FBgn0285950	RpL19	RpL19	CG2746	FBgn0285950
AmiGO	FBgn0035524	CG11583	CG11583	CG11583	FBgn0035524
AmiGO	FBgn0050454	tRNA	tRNA:Glu-CTC-2-1	CR30454	FBgn0050454
AmiGO	FBgn0050452	tRNA	tRNA:iMet-CAT-1-1	CR30452	FBgn0050452
AmiGO	FBgn0050407	tRNA	tRNA:Gly-TCC-2-1	CR30407	FBgn0050407
AmiGO	FBgn0050406	tRNA	tRNA:Gly-TCC-2-2	CR30406	FBgn0050406
AmiGO	FBgn0050333	tRNA	tRNA:Phe-GAA-1-4	CR30333	FBgn0050333
AmiGO	FBgn0050326	tRNA	tRNA:Val-AAC-2-2	CR30326	FBgn0050326
AmiGO	FBgn0050316	tRNA	tRNA:Arg-ACG-1-4	CR30316	FBgn0050316
AmiGO	FBgn0050299	tRNA	tRNA:Thr-AGT-1-2	CR30299	FBgn0050299
AmiGO	FBgn0050298	tRNA	tRNA:Thr-AGT-2-1	CR30298	FBgn0050298
AmiGO	FBgn0050297	tRNA	tRNA:Ile-AAT-1-2	CR30297	FBgn0050297
AmiGO	FBgn0051471	tRNA	tRNA:Thr-AGT-1-7	CR31471	FBgn0051471
AmiGO	FBgn0051480	tRNA	tRNA:Thr-CGT-1-1	CR31480	FBgn0051480
AmiGO	FBgn0051491	tRNA	tRNA:Gly-TCC-1-2	CR31491	FBgn0051491
AmiGO	FBgn0051518	tRNA	tRNA:Gly-TCC-1-4	CR31518	FBgn0051518
AmiGO	FBgn0051580	tRNA	tRNA:Ala-AGC-2-8	CR31580	FBgn0051580
AmiGO	FBgn0015756	RpL9	RpL9	CG6141	FBgn0015756
AmiGO	FBgn0052546	tRNA	tRNA:Pro-CGG-2-1	CR32546	FBgn0052546
AmiGO	FBgn0052525	tRNA	tRNA:Tyr-GTA-2-1	CR32525	FBgn0052525
AmiGO	FBgn0052520	tRNA	tRNA:Tyr-GTA-1-1	CR32520	FBgn0052520
AmiGO	FBgn0050199	tRNA	tRNA:Ala-CGC-1-2	CR30199	FBgn0050199
AmiGO	FBgn0050198	tRNA	tRNA:Ala-CGC-1-1	CR30198	FBgn0050198
AmiGO	FBgn0003330	Sce	Sce	CG5595	FBgn0003330
AmiGO	FBgn0050155	tRNA	tRNA:Trp-CCA-1-1	CR30155	FBgn0050155
AmiGO	FBgn0011950	tRNA	tRNA:Arg-TCG-3-3	CR32619	FBgn0011950
AmiGO	FBgn0011958	tRNA	tRNA:Arg-ACG-1-1	CR30304	FBgn0011958
AmiGO	FBgn0003279	RpL4	RpL4	CG5502	FBgn0003279
AmiGO	FBgn0263755	Su	Su(var)3-9	CG43664	FBgn0263755
AmiGO	FBgn0035024	CG11414	CG11414	CG11414	FBgn0035024
AmiGO	FBgn0033816	CG4679	CG4679	CG4679	FBgn0033816
AmiGO	FBgn0012016	tRNA	tRNA:Tyr-GTA-1-3	CR31987	FBgn0012016
AmiGO	FBgn0039735	Nph	Nph	CG7911	FBgn0039735
AmiGO	FBgn0011999	tRNA	tRNA:Val-CAC-2-1	CR31512	FBgn0011999
AmiGO	FBgn0011998	tRNA	tRNA:Val-CAC-2-2	CR31592	FBgn0011998
AmiGO	FBgn0011994	tRNA	tRNA:Thr-AGT-1-6	CR31590	FBgn0011994
AmiGO	FBgn0011993	tRNA	tRNA:Thr-AGT-1-5	CR31589	FBgn0011993
AmiGO	FBgn0011987	tRNA	tRNA:SeC-TCA-1-1	CR30024	FBgn0011987
AmiGO	FBgn0011986	tRNA	tRNA:Ser-AGA-2-5	CR32419	FBgn0011986
AmiGO	FBgn0011985	tRNA	tRNA:Ser-AGA-2-3	CR31734	FBgn0011985
AmiGO	FBgn0011984	tRNA	tRNA:Ser-AGA-2-4	CR31951	FBgn0011984
AmiGO	FBgn0011983	tRNA	tRNA:Ser-AGA-2-2	CR32609	FBgn0011983
AmiGO	FBgn0011982	tRNA	tRNA:Ser-AGA-2-1	CR32607	FBgn0011982
AmiGO	FBgn0011981	tRNA	tRNA:Ser-AGA-3-2	CR32618	FBgn0011981
AmiGO	FBgn0011980	tRNA	tRNA:Ser-AGA-3-1	CR32612	FBgn0011980
AmiGO	FBgn0011977	tRNA	tRNA:Ser-CGA-1-3	CR32608	FBgn0011977
AmiGO	FBgn0011976	tRNA	tRNA:Ser-CGA-1-2	CR32623	FBgn0011976
AmiGO	FBgn0011975	tRNA	tRNA:Ser-CGA-1-1	CR32621	FBgn0011975
AmiGO	FBgn0011974	tRNA	tRNA:Ser-AGA-1-1	CR32615	FBgn0011974
AmiGO	FBgn0011971	tRNA	tRNA:Ser-GCT-2-2	CR31476	FBgn0011971
AmiGO	FBgn0011970	tRNA	tRNA:Ser-GCT-2-1	CR31396	FBgn0011970
AmiGO	FBgn0011966	tRNA	tRNA:Arg-TCG-2-3	CR31443	FBgn0011966
AmiGO	FBgn0011965	tRNA	tRNA:Arg-TCG-4-1	CR31593	FBgn0011965
AmiGO	FBgn0011963	tRNA	tRNA:Arg-ACG-1-6	CR31584	FBgn0011963
AmiGO	FBgn0011962	tRNA	tRNA:Arg-ACG-1-7	CR31585	FBgn0011962
AmiGO	FBgn0011961	tRNA	tRNA:Arg-ACG-1-8	CR31582	FBgn0011961
AmiGO	FBgn0011960	tRNA	tRNA:Arg-ACG-1-9	CR31566	FBgn0011960
AmiGO	FBgn0011959	tRNA	tRNA:Arg-ACG-1-10	CR31581	FBgn0011959
AmiGO	FBgn0011957	tRNA	tRNA:Arg-ACG-1-2	CR30512	FBgn0011957
AmiGO	FBgn0011956	tRNA	tRNA:Arg-ACG-1-3	CR30314	FBgn0011956
AmiGO	FBgn0011955	tRNA	tRNA:Arg-ACG-1-5	CR30514	FBgn0011955
AmiGO	FBgn0011954	tRNA	tRNA:Arg-TCG-2-2	CR32526	FBgn0011954
AmiGO	FBgn0011953	tRNA	tRNA:Arg-TCG-1-1	CR32610	FBgn0011953
AmiGO	FBgn0011952	tRNA	tRNA:Arg-TCG-2-1	CR32624	FBgn0011952
AmiGO	FBgn0011951	tRNA	tRNA:Arg-TCG-3-4	CR32617	FBgn0011951
AmiGO	FBgn0011949	tRNA	tRNA:Arg-TCG-3-2	CR32620	FBgn0011949
AmiGO	FBgn0011948	tRNA	tRNA:Arg-TCG-3-1	CR32622	FBgn0011948
AmiGO	FBgn0011945	tRNA	tRNA:Pro-TGG-1-2	CR31571	FBgn0011945
AmiGO	FBgn0011944	tRNA	tRNA:Pro-TGG-1-1	CR31567	FBgn0011944
AmiGO	FBgn0011938	tRNA	tRNA:Asn-GTT-1-1	CR30513	FBgn0011938
AmiGO	FBgn0011937	tRNA	tRNA:Asn-GTT-1-2	CR33972	FBgn0011937
AmiGO	FBgn0011936	tRNA	tRNA:Asn-GTT-1-3	CR33973	FBgn0011936
AmiGO	FBgn0011935	tRNA	tRNA:Asn-GTT-1-7	CR30519	FBgn0011935
AmiGO	FBgn0011934	tRNA	tRNA:Asn-GTT-1-8	CR30319	FBgn0011934
AmiGO	FBgn0011933	tRNA	tRNA:Asn-GTT-1-4	CR30518	FBgn0011933
AmiGO	FBgn0011931	tRNA	tRNA:Asn-GTT-1-6	CR30510	FBgn0011931
AmiGO	FBgn0011928	tRNA	tRNA:iMet-CAT-1-5	CR32144	FBgn0011928
AmiGO	FBgn0011927	tRNA	tRNA:iMet-CAT-1-4	CR32142	FBgn0011927
AmiGO	FBgn0011921	tRNA	tRNA:iMet-CAT-2-1	CR30003	FBgn0011921
AmiGO	FBgn0011919	tRNA	tRNA:Met-CAT-1-5	CR31310	FBgn0011919
AmiGO	FBgn0011916	tRNA	tRNA:Met-CAT-1-2	CR32844	FBgn0011916
AmiGO	FBgn0011915	tRNA	tRNA:Met-CAT-1-1	CR30255	FBgn0011915
AmiGO	FBgn0011910	tRNA	tRNA:Leu-CAA-1-1	CR30508	FBgn0011910
AmiGO	FBgn0011909	tRNA	tRNA:Leu-CAA-2-1	CR32841	FBgn0011909
AmiGO	FBgn0011906	tRNA	tRNA:Leu-CAG-1-1	CR30292	FBgn0011906
AmiGO	FBgn0011905	tRNA	tRNA:Lys-TTT-2-5	CR31197	FBgn0011905
AmiGO	FBgn0011904	tRNA	tRNA:Lys-TTT-2-4	CR31486	FBgn0011904
AmiGO	FBgn0011902	tRNA	tRNA:Lys-TTT-1-1	CR31899	FBgn0011902
AmiGO	FBgn0028889	tRNA	tRNA:Leu-TAA-3-1	CR31831	FBgn0028889
AmiGO	FBgn0028882	tRNA	tRNA:Pro-AGG-1-1	CR31985	FBgn0028882
AmiGO	FBgn0011897	tRNA	tRNA:Lys-CTT-1-11	CR30520	FBgn0011897
AmiGO	FBgn0011896	tRNA	tRNA:Lys-CTT-1-10	CR30507	FBgn0011896
AmiGO	FBgn0011895	tRNA	tRNA:Lys-CTT-1-9	CR30303	FBgn0011895
AmiGO	FBgn0011894	tRNA	tRNA:Lys-CTT-1-8	CR30302	FBgn0011894
AmiGO	FBgn0011893	tRNA	tRNA:Lys-CTT-1-7	CR30301	FBgn0011893
AmiGO	FBgn0011892	tRNA	tRNA:Lys-CTT-1-6	CR30300	FBgn0011892
AmiGO	FBgn0011891	tRNA	tRNA:Lys-CTT-1-1	CR32837	FBgn0011891
AmiGO	FBgn0011890	tRNA	tRNA:Lys-CTT-1-5	CR30515	FBgn0011890
AmiGO	FBgn0011889	tRNA	tRNA:Lys-CTT-1-2	CR30517	FBgn0011889
AmiGO	FBgn0011888	tRNA	tRNA:Lys-CTT-1-3	CR30516	FBgn0011888
AmiGO	FBgn0011887	tRNA	tRNA:Lys-CTT-1-4	CR30312	FBgn0011887
AmiGO	FBgn0011885	tRNA	tRNA:Ile-AAT-1-7	CR30247	FBgn0011885
AmiGO	FBgn0011884	tRNA	tRNA:Ile-AAT-1-6	CR30246	FBgn0011884
AmiGO	FBgn0011883	tRNA	tRNA:Ile-AAT-1-5	CR30521	FBgn0011883
AmiGO	FBgn0011882	tRNA	tRNA:Ile-AAT-1-4	CR30244	FBgn0011882
AmiGO	FBgn0011881	tRNA	tRNA:Ile-AAT-1-3	CR32842	FBgn0011881
AmiGO	FBgn0011880	tRNA	tRNA:Ile-AAT-1-1	CR30313	FBgn0011880
AmiGO	FBgn0011879	tRNA	tRNA:Ala-TGC-2-1	CR30233	FBgn0011879
AmiGO	FBgn0011872	tRNA	tRNA:Gly-GCC-1-13	CR30210	FBgn0011872
AmiGO	FBgn0011871	tRNA	tRNA:Gly-GCC-1-12	CR30207	FBgn0011871
AmiGO	FBgn0011870	tRNA	tRNA:Gly-GCC-1-11	CR30138	FBgn0011870
AmiGO	FBgn0011869	tRNA	tRNA:Gly-GCC-1-10	CR30214	FBgn0011869
AmiGO	FBgn0011868	tRNA	tRNA:Gly-GCC-1-9	CR30228	FBgn0011868
AmiGO	FBgn0011867	tRNA	tRNA:Gly-GCC-1-8	CR30236	FBgn0011867
AmiGO	FBgn0011866	tRNA	tRNA:Gly-GCC-2-1	CR31980	FBgn0011866
AmiGO	FBgn0011865	tRNA	tRNA:Gly-GCC-1-7	CR31981	FBgn0011865
AmiGO	FBgn0011864	tRNA	tRNA:Gly-GCC-1-6	CR31982	FBgn0011864
AmiGO	FBgn0011863	tRNA	tRNA:Gly-GCC-1-5	CR31978	FBgn0011863
AmiGO	FBgn0011862	tRNA	tRNA:Gly-GCC-1-4	CR31977	FBgn0011862
AmiGO	FBgn0011861	tRNA	tRNA:Gly-GCC-1-3	CR31903	FBgn0011861
AmiGO	FBgn0011860	tRNA	tRNA:Gly-GCC-1-2	CR31945	FBgn0011860
AmiGO	FBgn0011859	tRNA	tRNA:Gly-GCC-1-1	CR31667	FBgn0011859
AmiGO	FBgn0011858	tRNA	tRNA:Phe-GAA-1-8	CR31586	FBgn0011858
AmiGO	FBgn0011855	tRNA	tRNA:Glu-CTC-3-9	CR32322	FBgn0011855
AmiGO	FBgn0011854	tRNA	tRNA:Glu-CTC-3-8	CR32323	FBgn0011854
AmiGO	FBgn0011853	tRNA	tRNA:Glu-CTC-3-6	CR32325	FBgn0011853
AmiGO	FBgn0011852	tRNA	tRNA:Glu-CTC-3-5	CR32326	FBgn0011852
AmiGO	FBgn0011851	tRNA	tRNA:Glu-CTC-3-4	CR32327	FBgn0011851
AmiGO	FBgn0011850	tRNA	tRNA:Glu-TTC-1-4	CR30451	FBgn0011850
AmiGO	FBgn0011849	tRNA	tRNA:Glu-TTC-1-5	CR30455	FBgn0011849
AmiGO	FBgn0011848	tRNA	tRNA:Glu-TTC-1-6	CR30453	FBgn0011848
AmiGO	FBgn0011845	tRNA	tRNA:Asp-GTC-1-11	CR31540	FBgn0011845
AmiGO	FBgn0011844	tRNA	tRNA:Asp-GTC-1-10	CR32125	FBgn0011844
[truncated: 1,908 more rows]

## Sheet: MuscleExpressedRBPs
FBgn	symbol	CGnumber	new_FBgn	BruIR1d1	BruIR1d2	Mef2IFM1	Mef2IFM2	TDT1	TDT2	leg1	leg2	salm1	salm2	IFMexp	legexp	TDTexp	Bru1exp	salmexp	AmiGO	NRM_RIC	GLAD	spliceosome	twoofthree
FBgn0010247	Parp	CG40411	FBgn0010247	33.6419	43.5268	11.6219	48.0536	71.6553	100.079	83.7899	117.186	60.9537	62.4462	29.8378	100.488	85.8674	38.5843	61.7	1	1	0	NA	2
FBgn0037220	CG14641	CG14641	FBgn0037220	967.07	1032.01	611.313	598	1086.14	1020.65	650.21	651.362	711.477	679.102	604.657	650.786	1053.4	999.538	695.29	1	1	1	yes	3
FBgn0015331	abs	CG14637	FBgn0015331	191.171	241.504	220.816	275.863	158.396	177.919	334.042	318.84	202.829	130.096	248.34	326.441	168.157	216.337	166.463	1	0	1	yes	2
FBgn0037249	eIF3a	CG9805	FBgn0037249	6136.7	6043.91	7049.85	5241.4	5525	5321.69	5247.48	4839.71	5109.61	6031.26	6145.63	5043.6	5423.34	6090.31	5570.43	1	1	1	NA	3
FBgn0037270	eIF3f1	CG9769	FBgn0037270	5695.62	5636.72	6404.84	5139.07	5672.08	5728.36	4463.21	4247.83	5426.99	4990.49	5771.95	4355.52	5700.22	5666.17	5208.74	1	0	1	NA	2
FBgn0037330	mRpL44	CG2109	FBgn0037330	1526.7	3409.13	4791.72	6210.48	890.034	1065.13	858.009	857.18	967.903	629.666	5501.1	857.594	977.583	2467.92	798.785	1	1	1	NA	3
FBgn0037342	CG2931	CG2931	FBgn0037342	352.439	402.974	425.362	244.717	384.676	520.254	282.093	312.297	283.75	208.154	335.04	297.195	452.465	377.706	245.952	1	0	1	yes	2
FBgn0037351	RpL13A	CG1475	FBgn0037351	42057.7	45847.1	89999	89854.9	34379.4	50550.5	33572.4	34284.8	28826.9	33015.8	89926.9	33928.6	42464.9	43952.4	30921.4	1	1	0	NA	2
FBgn0037369	CG2100	CG2100	FBgn0037369	424.528	533.555	370.739	383.539	252.679	207.307	182.103	193.921	289.005	208.154	377.139	188.012	229.993	479.041	248.579	1	0	1	NA	2
FBgn0037372	CG2091	CG2091	FBgn0037372	209.861	223.953	146.436	131.702	158.396	223.193	92.7275	115.996	166.046	137.902	139.069	104.362	190.794	216.907	151.974	1	1	0	NA	2
FBgn0003261	Rm62	CG10279	FBgn0003261	6532.4	5884.55	6394.38	5611.59	5871.96	4972.2	6604.32	6248.32	6064.9	7360.85	6002.99	6426.32	5422.08	6208.47	6712.87	1	1	1	yes	3
FBgn0261789	SmD2	CG1249	FBgn0261789	946.778	1001.82	1130.81	1315.24	2085.55	978.555	534.58	581.764	525.463	627.064	1223.03	558.172	1532.05	974.299	576.264	1	0	1	yes	2
FBgn0010774	Ref1	CG1101	FBgn0010774	901.388	973.035	827.48	662.072	1150.26	1104.85	803.824	781.039	795.551	871.645	744.776	792.432	1127.55	937.212	833.598	1	1	1	yes	3
FBgn0000504	dsx	CG11094	FBgn0000504	342.293	336.982	1954.81	1357.07	1101.23	1540.11	1414.93	1474.04	1061.44	522.987	1655.94	1444.49	1320.67	339.637	792.211	1	0	1	NA	2
FBgn0037549	CG7878	CG7878	FBgn0037549	879.494	788.397	1005.3	791.105	742.952	922.161	685.96	722.744	720.936	822.208	898.2	704.352	832.556	833.946	771.572	1	1	1	NA	3
FBgn0010173	RpA-70	CG9633	FBgn0010173	1833.75	1611.19	475.336	386.209	920.204	717.236	387.109	434.836	1118.19	671.297	430.772	410.973	818.72	1722.47	894.741	1	1	0	NA	2
FBgn0037561	CG9630	CG9630	FBgn0037561	251.513	249.928	234.763	145.051	98.0546	144.559	220.088	189.163	200.727	171.727	189.907	204.625	121.307	250.721	186.227	1	0	1	NA	2
FBgn0037566	mRpL1	CG7494	FBgn0037566	1169.46	2361.68	2729.99	2921.48	825.921	1016.68	456.934	499.675	683.102	772.772	2825.73	478.305	921.301	1765.57	727.937	1	1	1	NA	3
FBgn0037573	CG7483	CG7483	FBgn0037573	896.048	971.631	710.099	626.477	693.925	574.265	639.038	731.667	575.908	595.841	668.288	685.352	634.095	933.84	585.874	1	0	1	yes	2
FBgn0051450	mRpS18A	CG31450	FBgn0051450	409.042	1390.75	1363.25	1916.8	384.676	452.74	248.577	337.281	306.871	398.095	1640.03	292.929	418.708	899.897	352.483	1	1	0	NA	2
FBgn0037602	SLIRP2	CG8021	FBgn0037602	263.795	379.105	739.154	930.816	252.679	348.69	184.338	185.594	209.134	226.367	834.985	184.966	300.684	321.45	217.751	1	0	1	NA	2
FBgn0263231	bel	CG9748	FBgn0263231	4148.63	4276.86	6012.02	6235.4	2998.21	1961.08	4287.81	4304.94	4364.5	3785.8	6123.71	4296.37	2479.64	4212.75	4075.15	1	1	1	NA	3
FBgn0037607	CG8036	CG8036	FBgn0037607	5258.28	3131.82	8948.88	14505.1	3582.76	4177.92	2651.11	2840.41	7091.65	10904.7	11727	2745.76	3880.34	4195.05	8998.16	1	1	0	NA	2
FBgn0003165	pum	CG9755	FBgn0003165	2072.45	1994.51	1486.44	1632.04	2798.33	2513.11	3014.76	3224.69	4450.67	3080.68	1559.24	3119.72	2655.72	2033.48	3765.68	1	1	1	NA	3
FBgn0261552	ps	CG42670	FBgn0261552	3332.68	5638.83	10347	14426.8	13395.8	23248.6	16264.2	16513.1	13292.1	7831.79	12386.9	16388.6	18322.2	4485.75	10562	1	1	1	yes	3
FBgn0267790	rump	CG9373	FBgn0267790	1055.18	1124.68	922.78	755.509	1089.91	853.853	1236.74	1194.46	811.315	1121.43	839.145	1215.6	971.883	1089.93	966.373	1	1	1	NA	3
FBgn0037707	RnpS1	CG16788	FBgn0037707	429.868	466.86	230.114	257.176	165.939	297.061	251.928	260.545	245.917	322.639	243.645	256.237	231.5	448.364	284.278	1	0	1	NA	2
FBgn0037716	Son	CG8273	FBgn0037716	364.187	322.941	412.578	400.447	633.583	771.247	334.601	336.686	440.338	348.658	406.512	335.643	702.415	343.564	394.498	1	0	1	NA	2
FBgn0002431	hyd	CG9484	FBgn0002431	1926.66	1791.62	1336.52	1282.32	1071.06	634.631	1393.15	1509.14	2291.02	2138.78	1309.42	1451.14	852.844	1859.14	2214.9	1	0	1	NA	2
FBgn0028734	Fmr1	CG6203	FBgn0028734	978.284	1470.79	1432.98	1044.72	1810.24	1737.89	2168.48	2052.24	2011.47	1615.8	1238.85	2110.36	1774.06	1224.53	1813.63	1	1	1	NA	3
FBgn0260944	Rbp1	CG17136	FBgn0260944	783.375	888.79	746.127	906.789	1037.12	1235.11	740.144	836.361	618.996	653.083	826.458	788.252	1136.11	836.082	636.039	1	1	1	yes	3
FBgn0020910	RpL3	CG4863	FBgn0020910	69168.2	71828.4	96173.7	100852	47899.7	68587.8	50992.3	48511.9	49639.5	51546.7	98512.9	49752.1	58243.7	70498.3	50593.1	1	1	0	NA	2
FBgn0259139	glo	CG6946	FBgn0259139	1658.06	1470.79	1750.26	1433.6	1900.75	1813.34	1819.36	1921.96	1335.73	1597.58	1591.93	1870.66	1857.05	1564.42	1466.65	1	1	1	NA	3
FBgn0051368	CG31368	CG31368	FBgn0051368	175.151	174.107	154.571	89.878	150.853	73.8682	134.064	146.928	300.565	135.3	122.225	140.496	112.361	174.629	217.933	1	1	1	yes	3
FBgn0038013	CG10038	CG10038	FBgn0038013	215.735	248.524	167.356	129.923	301.706	140.588	106.692	118.375	220.695	119.689	148.639	112.534	221.147	232.13	170.192	1	1	0	NA	2
FBgn0038016	MBD-R2	CG10042	FBgn0038016	733.179	703.45	565.987	777.756	663.754	499.603	784.273	754.271	509.699	629.666	671.872	769.272	581.679	718.314	569.683	1	1	0	NA	2
FBgn0038046	CG5641	CG5641	FBgn0038046	677.109	849.475	539.257	526.81	652.44	771.247	523.408	553.211	605.334	434.521	533.033	538.31	711.844	763.292	519.928	1	1	1	yes	3
FBgn0038106	CG7488	CG7488	FBgn0038106	650.943	792.609	865.833	1036.71	874.948	972.995	525.642	528.823	493.936	473.55	951.272	527.232	923.972	721.776	483.743	1	1	1	NA	3
FBgn0263396	sqd	CG16901	FBgn0263396	2961.02	2832.05	3017.05	3778.44	2632.39	2671.96	3610.79	4177.04	3745.5	5013.91	3397.74	3893.91	2652.18	2896.53	4379.71	1	1	1	yes	3
FBgn0015778	rin	CG9412	FBgn0015778	3203.99	3990.43	3027.51	3349.51	3545.05	4000	5256.42	5602.9	4117.53	4220.32	3188.51	5429.66	3772.53	3597.21	4168.93	1	1	1	yes	3
FBgn0004237	Hrb87F	CG12749	FBgn0004237	1215.38	1126.08	1310.95	1451.4	1399.16	784.75	1383.09	1275.96	1355.7	1548.15	1381.17	1329.52	1091.96	1170.73	1451.92	1	1	1	yes	3
FBgn0004587	B52	CG10851	FBgn0004587	2182.45	2268.31	1974.56	1558.18	3228.26	2961.88	1934.43	1650.12	2198.54	2240.26	1766.37	1792.27	3095.07	2225.38	2219.4	1	1	1	yes	3
FBgn0262955	RpII140	CG3180	FBgn0262955	722.499	865.622	433.498	307.009	395.99	422.558	435.149	478.26	917.459	668.695	370.253	456.705	409.274	794.061	793.077	1	1	0	NA	2
FBgn0038251	Hexim	CG3508	FBgn0038251	367.391	402.272	339.36	218.911	659.983	872.121	316.726	328.358	265.884	288.814	279.135	322.542	766.052	384.831	277.349	1	0	1	NA	2
FBgn0051155	Rpb7	CG31155	FBgn0051155	95.5856	89.1598	104.597	93.4376	82.9693	79.4281	93.8447	118.97	86.176	80.6597	99.0174	106.407	81.1987	92.3727	83.4178	1	0	1	NA	2
FBgn0263740	eIF2gamma	CG43665	FBgn0263740	1981.67	1883.59	1630.55	1413.13	848.549	1043.69	1225.57	1283.69	1191.75	1423.25	1521.84	1254.63	946.117	1932.63	1307.5	1	1	1	NA	3
FBgn0027378	MRG15	CG6363	FBgn0027378	612.496	605.163	677.558	555.286	659.983	511.517	406.102	393.197	368.875	304.425	616.422	399.649	585.75	608.829	336.65	1	1	0	NA	2
FBgn0003721	Tm1	CG4898	FBgn0003721	225613	249395	512349	456418	652602	741249	207606	195326	126583	137121	484384	201466	696926	237504	131852	1	1	0	NA	2
FBgn0038327	Trax	CG5063	FBgn0038327	278.747	276.606	238.249	282.092	169.71	243.05	232.377	248.648	266.935	275.804	260.171	240.513	206.38	277.676	271.37	1	1	0	NA	2
FBgn0041188	Atx2	CG5166	FBgn0041188	1543.25	1760.73	3196.03	3038.95	3186.77	3290.71	4332.5	4112.21	6073.31	3361.69	3117.49	4222.35	3238.74	1651.99	4717.5	1	1	0	NA	2
FBgn0038344	obe	CG5205	FBgn0038344	295.301	302.582	463.714	359.512	79.1979	121.525	299.409	323.004	363.621	400.696	411.613	311.207	100.361	298.941	382.159	1	1	1	yes	3
FBgn0027948	msps	CG5000	FBgn0027948	1410.29	1321.95	1258.65	1161.3	1108.77	632.248	1550.11	1662.61	1457.64	1402.44	1209.97	1606.36	870.509	1366.12	1430.04	1	1	0	NA	2
FBgn0261286	Mat89Ba	CG12785	FBgn0261286	202.919	206.401	113.895	129.923	75.4266	96.108	119.54	129.678	213.338	174.329	121.909	124.609	85.7673	204.66	193.834	1	0	1	NA	2
FBgn0283477	SF2	CG6987	FBgn0283477	1101.64	1091.68	906.51	674.53	1485.9	1174.74	874.767	932.132	924.815	1222.9	790.52	903.449	1330.32	1096.66	1073.86	1	1	1	NA	3
FBgn0266917	Sf3a1	CG16941	FBgn0266917	341.759	372.786	289.386	240.268	128.225	166.799	314.491	273.631	344.704	338.25	264.827	294.061	147.512	357.272	341.477	1	1	1	yes	3
FBgn0266053	Patr-1	CG5208	FBgn0266053	467.782	460.542	383.523	293.661	165.939	135.028	386.551	424.724	471.866	424.114	338.592	405.637	150.483	464.162	447.99	1	1	0	NA	2
FBgn0038474	mRpS11	CG5184	FBgn0038474	347.099	1262.28	798.426	666.521	169.71	229.547	230.143	293.856	390.945	296.619	732.473	262	199.629	804.688	343.782	1	1	0	NA	2
FBgn0010926	l(3)07882	CG5824	FBgn0010926	439.48	417.015	281.25	290.991	313.02	184.273	226.791	247.458	346.806	312.231	286.121	237.125	248.647	428.248	329.518	1	0	1	NA	2
FBgn0025571	SF1	CG5836	FBgn0025571	819.153	850.177	1463.2	980.649	995.631	871.327	981.459	995.186	734.598	934.091	1221.92	988.322	933.479	834.665	834.344	1	0	1	yes	2
FBgn0263995	cpo	CG43738	FBgn0263995	635.991	549	1466.69	1228.04	3435.68	2925.34	12569.6	12751.2	1937.91	2029.5	1347.36	12660.4	3180.51	592.496	1983.71	1	0	1	NA	2
FBgn0022943	Cbp20	CG12357	FBgn0022943	316.127	329.259	367.253	323.917	595.87	695.791	289.354	355.126	281.648	309.629	345.585	322.24	645.83	322.693	295.639	1	0	1	yes	2
FBgn0026250	eIF1A	CG8053	FBgn0026250	14075.6	11735.4	13340.8	14736.4	18928.3	19906.3	10627.4	10899.5	9501.43	9546.46	14038.6	10763.4	19417.3	12905.5	9523.95	1	1	1	NA	3
FBgn0027841	CstF64	CG7697	FBgn0027841	124.955	127.772	131.328	119.244	71.6553	120.731	129.595	109.453	143.977	122.29	125.286	119.524	96.193	126.364	133.134	1	1	1	NA	3
FBgn0261792	snRNP-U1-C	CG5454	FBgn0261792	318.263	372.084	310.305	338.155	309.249	509.929	344.656	349.178	263.783	267.998	324.23	346.917	409.589	345.173	265.89	1	0	1	yes	2
FBgn0038704	CG5316	CG5316	FBgn0038704	232.823	308.9	335.873	257.176	154.625	208.896	278.741	277.201	395.148	322.639	296.525	277.971	181.76	270.862	358.894	1	0	1	yes	2
FBgn0038769	Regnase-1	CG10889	FBgn0038769	67.2837	58.2698	156.896	123.694	162.167	154.091	166.463	169.533	60.9537	88.4655	140.295	167.998	158.129	62.7768	74.7096	1	0	1	NA	2
FBgn0038805	TFAM	CG4217	FBgn0038805	1482.91	2193.19	5505.3	4842.74	1776.3	2288.32	919.454	881.569	1023.6	1074.6	5174.02	900.512	2032.31	1838.05	1049.1	1	1	0	NA	2
FBgn0038808	Srp14	CG5417	FBgn0038808	579.922	535.661	835.616	740.381	637.355	1090.55	623.955	668.018	510.75	556.812	787.999	645.987	863.952	557.791	533.781	1	0	1	NA	2
FBgn0038810	Srp72	CG5434	FBgn0038810	842.115	757.507	1178.46	985.989	331.877	714.059	1027.26	892.871	658.931	830.014	1082.23	960.068	522.968	799.811	744.473	1	1	1	NA	3
FBgn0038811	Pus1	CG4159	FBgn0038811	253.115	248.524	215.005	243.828	147.082	179.508	216.737	212.957	196.523	226.367	229.416	214.847	163.295	250.82	211.445	1	1	1	NA	3
FBgn0038826	Syp	CG17838	FBgn0038826	3021.36	3245.56	3549.33	6060.09	11717.5	14094.5	9639.19	10597.3	8591.33	5760.66	4804.71	10118.2	12906	3133.46	7175.99	1	0	1	yes	2
FBgn0019936	RpS20	CG15693	FBgn0019936	22983.8	25930.8	46179.7	32715.6	12041.9	15178.7	11289.3	11849.4	21847.7	18731.3	39447.6	11569.4	13610.3	24457.3	20289.5	1	1	1	NA	3
FBgn0038872	Nelf-A	CG5874	FBgn0038872	411.712	482.305	929.753	726.143	512.901	397.935	901.579	801.859	514.954	439.725	827.948	851.719	455.418	447.009	477.34	1	0	1	NA	2
FBgn0266581	pit	CG6375	FBgn0266581	496.618	461.244	317.278	316.798	245.136	260.524	303.878	272.442	416.167	377.279	317.038	288.16	252.83	478.931	396.723	1	0	1	NA	2
FBgn0264491	how	CG10293	FBgn0264491	3518.51	2921.21	1786.29	1585.77	5272.32	2704.53	8109.19	8892.43	1683.58	2076.34	1686.03	8500.81	3988.42	3219.86	1879.96	1	0	1	yes	2
FBgn0038953	CG18596	CG18596	FBgn0038953	178.355	124.262	178.978	402.226	52.7986	65.9254	151.38	138.005	238.56	156.116	290.602	144.693	59.362	151.309	197.338	1	0	1	NA	2
FBgn0038964	Nop56	CG13849	FBgn0038964	793.521	681.686	627.584	636.265	614.727	500.397	378.73	402.119	579.061	671.297	631.924	390.425	557.562	737.603	625.179	1	1	0	NA	2
FBgn0038989	CG6937	CG6937	FBgn0038989	319.865	372.786	254.52	256.286	116.911	231.136	213.385	218.31	241.713	231.571	255.403	215.848	174.024	346.325	236.642	1	0	1	NA	2
FBgn0051156	CG31156	CG31156	FBgn0051156	115.878	163.577	124.355	120.134	139.539	115.171	144.677	148.118	262.732	161.319	122.244	146.398	127.355	139.727	212.026	1	1	1	NA	3
FBgn0024958	Irp-1A	CG4900	FBgn0024958	503.56	452.819	617.124	452.95	256.45	260.524	441.293	461.604	517.056	660.889	535.037	451.449	258.487	478.19	588.972	1	0	1	NA	2
FBgn0039016	Dcr-1	CG4792	FBgn0039016	250.445	273.798	237.087	175.307	196.109	208.896	213.944	236.751	320.533	231.571	206.197	225.347	202.503	262.121	276.052	1	1	1	NA	3
FBgn0002622	RpS3	CG6779	FBgn0002622	39725.2	43938.2	70772.8	80181	25090.7	36795.1	29401.3	29458.2	24681	30609	75476.9	29429.8	30942.9	41831.7	27645	1	1	1	NA	3
FBgn0040227	eIF3d1	CG10161	FBgn0040227	3836.77	3883.72	3198.35	2991.78	2225.08	2365.37	3115.87	3037.9	2405.57	3028.64	3095.07	3076.89	2295.23	3860.25	2717.11	1	1	1	NA	3
FBgn0039117	tst	CG10210	FBgn0039117	370.061	433.864	370.739	343.494	248.908	298.65	392.695	364.644	443.491	377.279	357.117	378.67	273.779	401.962	410.385	1	1	1	yes	3
FBgn0260634	eIF4G2	CG10192	FBgn0260634	990.032	713.278	769.371	1171.97	742.952	836.378	1221.1	1489.51	1468.14	1392.03	970.672	1355.3	789.665	851.655	1430.09	1	0	1	NA	2
FBgn0005674	GluProRS	CG5394	FBgn0005674	3964.4	5081.41	4203.65	3278.32	1602.82	1603.65	1912.09	2060.56	2293.12	3502.19	3740.99	1986.32	1603.23	4522.9	2897.66	1	0	1	NA	2
FBgn0051184	LSm3	CG31184	FBgn0051184	99.3236	103.201	76.7047	93.4376	90.5119	251.787	105.575	100.53	85.1251	122.29	85.0711	103.053	171.15	101.262	103.708	1	0	1	yes	2
FBgn0005649	Rox8	CG5422	FBgn0005649	1639.91	1324.06	1876.94	1713.91	1749.9	1796.66	2463.98	2287.8	2876.39	2456.22	1795.43	2375.89	1773.28	1481.98	2666.3	1	1	1	yes	3
FBgn0043455	CG5986	CG5986	FBgn0043455	759.345	827.01	628.746	820.471	1022.03	1482.13	551.338	540.125	550.686	601.045	724.608	545.731	1252.08	793.177	575.865	1	1	0	yes	2
FBgn0053100	eIF4EHP	CG33100	FBgn0053100	809.541	824.903	713.586	907.679	1342.59	1490.07	1410.46	1427.64	1027.81	731.141	810.632	1419.05	1416.33	817.222	879.474	1	0	1	NA	2
FBgn0011725	twin	CG31137	FBgn0011725	1431.65	1036.22	903.023	961.962	1436.88	1395.55	1575.25	1537.1	1449.23	993.935	932.492	1556.17	1416.21	1233.93	1221.58	1	1	0	NA	2
FBgn0043884	mask	CG33106	FBgn0043884	4564.08	4191.21	4712.69	4831.17	4420	3540.91	5980.92	5714.14	6127.95	6174.37	4771.93	5847.53	3980.45	4377.65	6151.16	1	1	1	NA	3
FBgn0039175	beta-PheRS	CG5706	FBgn0039175	754.539	852.985	769.371	732.372	561.928	538.523	706.628	723.934	611.639	762.364	750.872	715.281	550.225	803.762	687.002	1	1	1	NA	3
FBgn0028471	Nab2	CG5720	FBgn0028471	663.225	749.083	682.207	612.238	852.321	724.385	583.178	559.16	519.158	535.997	647.222	571.169	788.353	706.154	527.577	1	0	1	NA	2
FBgn0039182	CG5728	CG5728	FBgn0039182	508.366	445.097	235.925	297.22	154.625	153.296	258.631	258.165	394.097	335.648	266.573	258.398	153.96	476.731	364.873	1	1	1	yes	3
FBgn0039183	Dis3	CG6413	FBgn0039183	371.662	401.57	305.656	267.854	90.5119	231.93	268.128	245.673	390.945	390.289	286.755	256.901	161.221	386.616	390.617	1	0	1	NA	2
FBgn0039226	Ude	CG18410	FBgn0039226	3161.8	2768.17	277.764	220.691	516.672	342.335	963.584	932.726	865.964	1269.74	249.227	948.155	429.504	2964.98	1067.85	1	0	1	NA	2
FBgn0039229	Saf-B	CG6995	FBgn0039229	1000.18	1036.92	1765.37	1100.78	1210.6	1461.48	1507.1	1390.76	1138.15	1150.05	1433.08	1448.93	1336.04	1018.55	1144.1	1	1	1	yes	3
FBgn0039261	Ythdf	CG6422	FBgn0039261	528.658	543.383	785.642	756.399	633.583	501.192	870.298	874.431	627.403	601.045	771.02	872.364	567.387	536.021	614.224	1	1	1	NA	3
FBgn0046214	vig2	CG11844	FBgn0046214	1360.63	1235.6	1736.31	1631.15	999.402	1188.24	1316.62	1208.14	1327.32	1535.14	1683.73	1262.38	1093.82	1298.11	1431.23	1	1	0	NA	2
FBgn0259152	Clbn	CG11847	FBgn0259152	518.512	530.044	310.305	309.679	509.13	414.615	348.007	393.197	710.426	601.045	309.992	370.602	461.872	524.278	655.736	1	1	0	NA	2
FBgn0039300	RpS27	CG10423	FBgn0039300	25389.5	30027.2	46386.6	46801.5	20346.3	31247	14888.3	16319.1	20769.5	22509.3	46594	15603.7	25796.7	27708.3	21639.4	1	1	0	NA	2
FBgn0039302	Nup358	CG11856	FBgn0039302	2516.2	2360.28	1874.62	1632.04	1135.17	1666.4	1722.72	1648.93	2341.46	1743.29	1753.33	1685.82	1400.79	2438.24	2042.38	1	1	0	NA	2
FBgn0011666	msi	CG5099	FBgn0011666	140.441	113.029	328.9	359.512	471.416	837.173	1668.54	1640.6	659.982	439.725	344.206	1654.57	654.294	126.735	549.854	1	1	1	NA	3
FBgn0039385	CG5913	CG5913	FBgn0039385	874.688	998.309	397.47	358.622	795.751	743.447	335.718	312.297	583.264	611.452	378.046	324.007	769.599	936.499	597.358	1	1	0	NA	2
FBgn0001197	His2Av	CG5499	FBgn0001197	674.973	646.584	699.639	711.015	539.3	701.35	516.704	511.572	517.056	996.537	705.327	514.138	620.325	660.779	756.797	1	1	0	NA	2
FBgn0004903	Rb97D	CG6354	FBgn0004903	307.583	287.839	256.844	372.86	331.877	383.638	359.738	415.801	331.042	262.794	314.852	387.769	357.757	297.711	296.918	1	1	1	NA	3
FBgn0039488	CG6066	CG6066	FBgn0039488	144.713	179.022	103.435	98.7768	131.997	274.027	143.001	140.98	141.875	202.95	101.106	141.991	203.012	161.868	172.413	1	1	0	yes	2
FBgn0015737	Hmu	CG3373	FBgn0015737	1510.68	1092.38	2313.92	1638.27	1018.26	1109.61	2221.55	2079	1237.99	1740.69	1976.1	2150.28	1063.94	1301.53	1489.34	1	0	1	NA	2
FBgn0045862	btz	CG12878	FBgn0045862	679.245	706.96	989.025	725.253	520.443	720.413	945.709	814.946	688.357	843.024	857.139	880.327	620.428	693.103	765.69	1	1	0	NA	2
FBgn0039557	CG12259	CG12259	FBgn0039557	260.057	221.846	256.844	350.613	305.478	493.249	394.371	399.74	233.306	169.125	303.729	397.056	399.363	240.952	201.215	1	1	0	NA	2
FBgn0003279	RpL4	CG5502	FBgn0003279	41016.4	43175.1	85617.5	72895.5	38456.2	54259.7	32330.6	31633.6	32791	43197.2	79256.5	31982.1	46358	42095.7	37994.1	1	1	0	NA	2
FBgn0085391	trv	CG34362	FBgn0085391	123.887	156.556	215.005	223.36	422.389	552.026	707.745	625.783	403.556	145.708	219.183	666.764	487.207	140.222	274.632	1	0	1	yes	2
FBgn0085383	CG34354	CG34354	FBgn0085383	35.2439	65.2902	129.003	71.1905	124.454	79.4281	197.186	140.385	121.907	52.0385	100.097	168.785	101.941	50.267	86.973	1	0	1	NA	2
FBgn0039588	mIF2	CG12413	FBgn0039588	160.199	394.55	366.09	350.613	90.5119	117.554	202.772	192.137	171.301	197.746	358.352	197.454	104.033	277.374	184.524	1	1	1	NA	3
FBgn0001215	Hrb98DE	CG9983	FBgn0001215	1575.29	1826.02	1806.05	1867.86	1482.13	936.458	1727.19	1694.73	1729.83	2167.4	1836.95	1710.96	1209.3	1700.66	1948.61	1	1	1	yes	3
FBgn0265998	Doa	CG42320	FBgn0265998	20318.6	17516	29524.3	34716.1	14708.2	14320.9	9719.63	9437.31	8809.92	7584.61	32120.2	9578.47	14514.5	18917.3	8197.26	1	1	0	yes	2
FBgn0027873	Cpsf100	CG1957	FBgn0027873	311.321	305.39	281.25	203.783	313.02	319.301	301.085	303.969	306.871	307.027	242.517	302.527	316.161	308.355	306.949	1	0	1	NA	2
FBgn0039626	Slu7	CG1420	FBgn0039626	407.44	449.309	455.579	534.819	388.447	559.174	473.134	452.087	351.009	335.648	495.199	462.61	473.811	428.375	343.329	1	0	1	yes	2
FBgn0041588	eIF2D	CG31426	FBgn0041588	732.111	850.177	1134.3	749.28	754.266	718.825	521.732	502.649	764.024	663.491	941.79	512.19	736.545	791.144	713.757	1	1	1	NA	3
FBgn0041186	Slbp	CG11886	FBgn0041186	299.573	317.325	334.711	190.435	426.16	477.363	205.565	198.085	252.222	158.717	262.573	201.825	451.762	308.449	205.47	1	1	1	NA	3
FBgn0029176	eEF1gamma	CG11901	FBgn0029176	28590.8	32364.3	54532.4	48172.8	21605.9	19889.6	19820.8	18907.3	22055.8	23490.2	51352.6	19364.1	20747.8	30477.5	22773	1	1	1	NA	3
FBgn0002924	ncd	CG7831	FBgn0002924	87.0416	68.0984	122.03	64.9613	248.908	479.746	87.1415	60.08	137.671	65.0481	93.4957	73.6107	364.327	77.57	101.36	1	1	0	NA	2
FBgn0039726	eIF2Balpha	CG7883	FBgn0039726	545.212	570.763	360.279	555.286	441.246	548.054	388.227	360.48	408.81	392.891	457.783	374.353	494.65	557.987	400.851	1	0	1	NA	2
FBgn0039730	CG7903	CG7903	FBgn0039730	370.595	397.358	603.177	578.423	1052.2	1412.23	743.496	663.854	757.718	556.812	590.8	703.675	1232.22	383.976	657.265	1	0	1	NA	2
FBgn0039846	PNPase	CG11337	FBgn0039846	672.837	1008.14	1131.97	1148.84	271.536	342.335	420.067	494.916	458.204	460.541	1140.41	457.491	306.936	840.487	459.372	1	0	1	NA	2
FBgn0039857	RpL6	CG11522	FBgn0039857	41931.6	45164	74414	69368.9	32791.7	37241.5	29876.7	27668.3	31326	34910	71891.5	28772.5	35016.6	43547.8	33118	1	1	0	NA	2
FBgn0039861	pasha	CG1800	FBgn0039861	116.412	118.646	144.112	135.262	109.369	131.056	166.463	147.523	124.009	140.504	139.687	156.993	120.212	117.529	132.257	1	1	1	NA	3
FBgn0000557	eEF1alpha2	CG1873	FBgn0000557	38717.5	69238.5	32392.6	50153.7	9081.36	16803	23884.6	22427.7	21602.8	28727.9	41273.2	23156.1	12942.2	53978	25165.4	1	0	1	NA	2
FBgn0011224	heph	CG31000	FBgn0011224	298.505	244.312	381.199	436.042	4940.44	7992.06	945.709	1016.6	605.334	569.822	408.62	981.155	6466.25	271.408	587.578	1	1	1	NA	3
FBgn0002780	mod	CG2050	FBgn0002780	1397.47	1447.62	536.933	789.325	441.246	517.871	712.773	700.14	1174.94	1014.75	663.129	706.456	479.559	1422.55	1094.84	1	1	1	NA	3
FBgn0035111	Dis3l2	CG16940	FBgn0035111	293.165	358.043	256.844	187.765	199.88	146.942	367	384.869	411.963	369.473	222.305	375.934	173.411	325.604	390.718	1	1	1	NA	3
FBgn0035121	Tudor-SN	CG7008	FBgn0035121	3057.67	2556.15	4086.27	3526.6	1255.85	1164.42	2422.09	2396.06	2368.79	2906.35	3806.43	2409.07	1210.13	2806.91	2637.57	1	1	0	NA	2
FBgn0052344	CG32344	CG32344	FBgn0052344	437.344	398.06	302.17	219.801	147.082	103.257	199.979	183.809	308.972	338.25	260.985	191.894	125.169	417.702	323.611	1	0	1	NA	2
FBgn0028577	hfp	CG12085	FBgn0028577	1589.71	1638.57	2103.57	1860.74	1708.41	1835.58	1780.81	1743.51	1312.61	1425.85	1982.15	1762.16	1772	1614.14	1369.23	1	0	1	yes	2
FBgn0035235	CG7879	CG7879	FBgn0035235	219.473	227.463	326.576	583.762	286.621	285.147	362.531	383.679	138.722	291.416	455.169	373.105	285.884	223.468	215.069	1	1	1	yes	3
FBgn0035271	CG2021	CG2021	FBgn0035271	404.236	626.927	596.204	954.843	328.106	725.179	253.045	242.699	240.662	140.504	775.524	247.872	526.642	515.581	190.583	1	0	1	yes	2
FBgn0002183	dre4	CG1828	FBgn0002183	775.365	675.368	612.475	422.694	626.041	436.06	589.322	600.8	724.088	642.675	517.584	595.061	531.051	725.366	683.382	1	1	0	NA	2
FBgn0035336	CG9004	CG9004	FBgn0035336	168.209	190.254	194.086	217.131	105.597	139.794	232.936	204.034	272.19	161.319	205.609	218.485	122.695	179.232	216.755	1	0	1	NA	2
FBgn0261602	RpL8	CG1263	FBgn0261602	34617.5	38134.4	66607.5	66350.5	33825.1	45047.7	28869.5	26736.8	27969.4	32755.6	66479	27803.1	39436.4	36375.9	30362.5	1	1	1	NA	3
FBgn0001233	Hsp83	CG1242	FBgn0001233	38614.5	32864.9	13373.3	48066.1	15850.9	8911.84	35248.2	33607.9	5641.37	18374.8	30719.7	34428	12381.4	35739.7	12008.1	1	1	0	NA	2
FBgn0035423	eIF1	CG17737	FBgn0035423	3790.32	4080.99	4038.62	3548.85	4993.24	4137.41	2109.27	2150.98	2026.19	2981.81	3793.73	2130.13	4565.33	3935.65	2504	1	0	1	NA	2
FBgn0027616	Ythdc1	CG12076	FBgn0027616	1076.54	798.226	969.268	638.045	939.061	1002.38	1050.73	950.572	797.653	817.004	803.656	1000.65	970.722	937.383	807.329	1	1	1	NA	3
FBgn0026259	eIF5B	CG10840	FBgn0026259	3561.23	3723.65	3290.16	3991.12	5204.43	5563.15	3062.24	2938.56	3791.74	3398.11	3640.64	3000.4	5383.79	3642.44	3594.93	1	1	1	NA	3
FBgn0004875	enc	CG10847	FBgn0004875	2138.66	1849.19	2151.22	2657.19	6569.66	6779.99	3500.18	3417.42	2676.71	1946.24	2404.2	3458.8	6674.82	1993.92	2311.48	1	1	0	NA	2
FBgn0035526	CG1316	CG1316	FBgn0035526	842.649	795.418	948.348	981.539	852.321	896.744	799.914	798.885	651.575	572.424	964.944	799.4	874.532	819.033	611.999	1	1	1	NA	3
FBgn0035532	CG15014	CG15014	FBgn0035532	168.743	191.658	176.653	108.566	113.14	126.291	127.919	139.195	130.315	130.096	142.609	133.557	119.715	180.201	130.206	1	1	1	NA	3
FBgn0035534	mRpS6	CG15016	FBgn0035534	674.973	1614.7	2108.22	2864.53	561.928	637.014	297.175	347.393	445.593	564.618	2486.37	322.284	599.471	1144.84	505.105	1	1	1	NA	3
FBgn0261797	Dhc64C	CG7507	FBgn0261797	3675.51	3494.08	3340.14	2973.98	1938.46	1287.53	2968.4	3161.04	3513.25	3483.98	3157.06	3064.72	1613	3584.79	3498.61	1	1	0	NA	2
FBgn0035591	CG4611	CG4611	FBgn0035591	259.523	438.778	362.604	311.459	113.14	191.422	239.639	218.905	357.315	270.6	337.031	229.272	152.281	349.151	313.958	1	1	0	NA	2
FBgn0028962	AlaRS-m	CG4633	FBgn0028962	697.401	849.475	1120.35	798.224	509.13	547.26	593.791	585.928	828.13	582.831	959.288	589.86	528.195	773.438	705.481	1	0	1	NA	2
FBgn0010747	Srp54k	CG4659	FBgn0010747	2540.23	2155.98	2288.36	2034.27	2051.6	1973	2132.73	2020.71	1772.91	2104.96	2161.31	2076.72	2012.3	2348.1	1938.94	1	0	1	NA	2
FBgn0052423	shep	CG32423	FBgn0052423	2194.2	2483.84	2373.2	2649.18	7840.59	7789.52	4713.46	4585.11	6901.44	6057.28	2511.19	4649.29	7815.06	2339.02	6479.36	1	1	1	NA	3
FBgn0263106	DnaJ-1	CG10578	FBgn0263106	2892.13	2625.65	4577.87	10231.9	5200.66	3841.94	7093.65	4638.65	2524.33	3575.05	7404.87	5866.15	4521.3	2758.89	3049.69	1	1	0	NA	2
FBgn0035692	Sf3b6	CG13298	FBgn0035692	808.473	892.3	771.695	697.667	1010.72	937.252	735.117	771.522	791.348	835.218	734.681	753.319	973.984	850.386	813.283	1	0	1	yes	2
FBgn0035720	CG10077	CG10077	FBgn0035720	2713.78	2981.59	4859.12	3442.95	3326.31	2507.55	4791.67	4931.32	3510.09	3015.63	4151.04	4861.49	2916.93	2847.68	3262.86	1	1	1	NA	3
FBgn0002775	msl-3	CG8631	FBgn0002775	285.689	262.565	198.735	167.298	290.392	289.118	277.065	259.95	204.931	223.766	183.016	268.508	289.755	274.127	214.348	1	0	1	NA	2
FBgn0035753	RpL18	CG8615	FBgn0035753	23594.7	26109.8	43553.1	41338.6	21519.2	29204.1	18147.2	15328.7	20315.5	23073.9	42445.8	16738	25361.7	24852.2	21694.7	1	1	0	NA	2
FBgn0024542	Neos	CG8614	FBgn0024542	169.811	143.919	144.112	189.545	218.737	152.502	191.041	169.533	122.958	127.494	166.828	180.287	185.62	156.865	125.226	1	1	1	yes	3
FBgn0011640	lark	CG8597	FBgn0011640	1520.29	1302.29	1344.66	1676.54	1252.08	1996.82	1272.49	1274.77	691.51	1246.32	1510.6	1273.63	1624.45	1411.29	968.916	1	1	1	yes	3
FBgn0015298	Srp19	CG4457	FBgn0015298	470.986	534.257	486.958	469.857	445.017	810.961	431.239	464.579	470.815	457.939	478.408	447.909	627.989	502.621	464.377	1	0	1	NA	2
FBgn0035771	Sec63	CG8583	FBgn0035771	2068.71	1395.67	3013.56	2847.62	1338.82	1202.54	2475.71	2399.03	1677.28	2266.28	2930.59	2437.37	1270.68	1732.19	1971.78	1	1	0	NA	2
FBgn0259935	CG42458	CG42458	FBgn0259935	25.0979	30.188	89.4888	64.0715	11.314	21.4456	190.482	173.102	76.7176	104.077	76.7801	181.792	16.3798	27.6429	90.3973	1	0	1	NA	2
FBgn0010406	RNaseX25	CG8194	FBgn0010406	1056.25	1056.58	739.154	747.5	1289.79	1163.62	932.302	1047.53	743.005	819.606	743.327	989.917	1226.71	1056.41	781.306	1	0	1	NA	2
FBgn0035831	Pop4	CG8038	FBgn0035831	183.695	216.23	178.978	127.253	313.02	278.793	117.864	121.35	170.25	132.698	153.115	119.607	295.907	199.963	151.474	1	0	1	NA	2
FBgn0029113	Uba2	CG7528	FBgn0029113	1132.08	1084.66	678.72	547.277	788.208	563.94	626.748	570.462	796.602	788.383	612.999	598.605	676.074	1108.37	792.493	1	1	0	NA	2
FBgn0035872	Cpsf6	CG7185	FBgn0035872	934.496	935.827	1156.38	884.542	799.522	904.687	1120.55	1107.61	872.269	957.508	1020.46	1114.08	852.104	935.161	914.889	1	1	1	yes	3
FBgn0263352	Unr	CG7015	FBgn0263352	4691.17	5317.29	2806.69	4801.8	5442.03	7329.63	5788.76	6824.13	5806.37	5302.72	3804.25	6306.45	6385.83	5004.23	5554.55	1	1	1	NA	3
FBgn0035900	ZC3H3	CG6694	FBgn0035900	195.977	227.463	619.448	632.706	546.843	441.62	371.469	399.74	237.509	244.581	626.077	385.604	494.232	211.72	241.045	1	0	1	NA	2
FBgn0035901	Pus7	CG6745	FBgn0035901	224.279	241.504	120.868	120.134	131.997	64.3368	145.236	118.375	192.32	166.523	120.501	131.806	98.1667	232.891	179.421	1	1	1	NA	3
FBgn0017430	Nelf-E	CG5994	FBgn0017430	211.997	236.589	140.625	174.417	282.85	374.107	205.565	209.388	100.889	127.494	157.521	207.476	328.478	224.293	114.192	1	0	1	NA	2
FBgn0017579	RpL14	CG6253	FBgn0017579	34788.9	37996.8	66711	77833.5	31505.7	52455.1	29330.4	31739.5	21256	29354.9	72272.2	30534.9	41980.4	36392.8	25305.5	1	1	0	NA	2
FBgn0264307	orb2	CG43782	FBgn0264307	2608.58	1340.2	787.966	1614.25	4408.68	6088.96	1033.97	1378.27	1110.83	928.887	1201.11	1206.12	5248.82	1974.39	1019.86	1	0	1	NA	2
FBgn0011787	mRpL12	CG5012	FBgn0011787	1789.96	6623.8	5435.57	5293.02	780.665	1816.52	1065.81	1086.79	1344.14	1701.66	5364.29	1076.3	1298.59	4206.88	1522.9	1	1	0	NA	2
FBgn0086706	pix	CG5651	FBgn0086706	8183.52	7262.66	7257.89	7644.97	3281.06	2791.1	4920.7	4676.72	5088.59	5081.56	7451.43	4798.71	3036.08	7723.09	5085.07	1	1	0	NA	2
FBgn0035947	Srp68	CG5064	FBgn0035947	1263.44	1241.22	1319.09	1103.45	807.065	788.721	1338.96	1329.49	885.931	1183.88	1211.27	1334.23	797.893	1252.33	1034.9	1	1	1	NA	3
FBgn0016070	smg	CG5263	FBgn0016070	338.021	459.138	376.55	432.482	584.556	567.117	649.092	658.5	439.287	244.581	404.516	653.796	575.837	398.579	341.934	1	1	1	NA	3
FBgn0011206	bol	CG4760	FBgn0011206	2105.55	2581.42	2174.46	2749.73	5853.1	7552.03	2585.2	2449	4737.58	2791.87	2462.1	2517.1	6702.57	2343.49	3764.72	1	1	1	NA	3
FBgn0015218	eIF4E1	CG4035	FBgn0015218	5006.23	5892.97	6899.93	6974.89	3839.21	3349.48	4297.86	4246.64	3308.32	3608.87	6937.41	4272.25	3594.35	5449.6	3458.59	1	1	1	NA	3
FBgn0035987	Cpsf5	CG3689	FBgn0035987	314.525	343.3	368.415	311.459	335.648	318.507	382.641	389.033	296.361	304.425	339.937	385.837	327.078	328.912	300.393	1	1	1	NA	3
FBgn0010408	RpS9	CG3395	FBgn0010408	47092.7	50482	78603.7	96952.6	33519.6	48228.8	31310.1	31553.9	28106	33788.6	87778.1	31432	40874.2	48787.4	30947.3	1	1	1	NA	3
FBgn0036018	CG3335	CG3335	FBgn0036018	499.822	464.754	259.169	222.47	75.4266	259.73	287.12	269.468	304.769	244.581	240.82	278.294	167.578	482.288	274.675	1	1	1	NA	3
FBgn0036035	CG18178	CG18178	FBgn0036035	240.833	209.912	184.788	200.223	131.997	129.468	194.393	169.533	134.519	101.475	192.506	181.963	130.732	225.372	117.997	1	1	1	NA	3
FBgn0052062	Rbfox1	CG32062	FBgn0052062	1895.16	2412.23	4365.19	4063.2	5992.64	9456.71	2789.65	2955.81	5045.5	4118.85	4214.2	2872.73	7724.68	2153.69	4582.17	1	0	1	NA	2
FBgn0036104	CG6418	CG6418	FBgn0036104	389.818	506.877	346.333	348.834	380.904	368.547	432.914	446.733	409.861	330.444	347.583	439.824	374.725	448.348	370.153	1	0	1	NA	2
FBgn0036135	mRpL2	CG7636	FBgn0036135	1360.63	3715.93	3698.09	3838.95	908.89	1464.65	947.384	879.785	809.214	936.693	3768.52	913.585	1186.77	2538.28	872.953	1	1	0	NA	2
FBgn0036213	RpL10Ab	CG7283	FBgn0036213	50584	53986.6	70103.4	75804.6	28650.8	28017.5	34004.7	31466.4	27781.2	33216.2	72954	32735.6	28334.1	52285.3	30498.7	1	1	1	NA	3
FBgn0022959	yps	CG5654	FBgn0022959	5869.7	10376.2	11804.4	10268.3	10786	10410.6	5684.87	5543.42	4941.46	4909.83	11036.4	5614.14	10598.3	8122.97	4925.64	1	1	1	yes	3
FBgn0036258	eIF3l	CG5642	FBgn0036258	5223.57	4770.4	4587.17	4095.23	3171.69	2883.24	3316.4	3254.43	3555.28	3655.7	4341.2	3285.42	3027.46	4996.98	3605.49	1	1	0	NA	2
FBgn0036277	CG10418	CG10418	FBgn0036277	114.276	150.94	146.436	99.6667	94.2832	204.925	64.7975	90.4174	111.398	174.329	123.051	77.6074	149.604	132.608	142.864	1	0	1	yes	2
FBgn0041775	tral	CG10686	FBgn0041775	2199.54	2203.02	3171.62	2602.9	3967.44	3195.39	3582.3	3307.37	2958.36	2320.92	2887.26	3444.83	3581.42	2201.28	2639.64	1	1	0	NA	2
FBgn0004926	eIF2beta	CG4153	FBgn0004926	4505.87	5150.91	3301.79	4765.32	2956.72	4868.95	2753.89	2745.83	2469.68	3158.74	4033.55	2749.86	3912.83	4828.39	2814.21	1	1	1	NA	3
FBgn0261933	SmD1	CG10753	FBgn0261933	131.897	139.005	123.192	153.949	71.6553	161.239	125.126	111.832	135.57	156.116	138.571	118.479	116.447	135.451	145.843	1	1	1	yes	3
FBgn0036317	CG10948	CG10948	FBgn0036317	497.686	1034.82	742.64	662.072	475.188	359.015	283.21	303.969	432.982	340.852	702.356	293.589	417.101	766.251	386.917	1	0	1	NA	2
FBgn0036335	mRpL20	CG11258	FBgn0036335	367.391	937.933	1020.4	1140.83	392.218	579.825	311.14	431.267	458.204	486.56	1080.62	371.203	486.022	652.662	472.382	1	1	1	NA	3
FBgn0011284	RpS4	CG11276	FBgn0011284	45165	46611.6	74732.4	90120.1	31132.3	50760.9	33784.6	33306.3	34617.5	33799	82426.2	33545.5	40946.6	45888.3	34208.3	1	1	1	NA	3
FBgn0086785	Vps36	CG10711	FBgn0086785	1575.29	1599.26	456.741	427.143	1127.63	1405.08	515.587	519.9	492.885	452.735	441.942	517.743	1266.36	1587.28	472.81	1	0	1	NA	2
FBgn0264001	bru3	CG43744	FBgn0264001	92.3816	100.393	131.328	212.682	237.594	328.833	150.822	188.568	287.954	273.202	172.005	169.695	283.213	96.3871	280.578	1	0	1	NA	2
FBgn0000411	D	CG5893	FBgn0000411	128.693	64.5882	449.768	311.459	18.8566	128.674	30.1644	28.5528	160.792	187.339	380.613	29.3586	73.7651	96.6408	174.065	1	0	1	NA	2
FBgn0036450	Tdrd3	CG13472	FBgn0036450	1983.8	1658.93	419.551	460.069	577.013	545.671	696.015	681.104	787.144	580.229	439.81	688.56	561.342	1821.37	683.687	1	1	1	NA	3
FBgn0036451	Helz	CG9425	FBgn0036451	3037.38	3051.79	4109.51	4213.59	5287.4	7312.95	4391.15	4703.49	4455.93	4012.17	4161.55	4547.32	6300.18	3044.59	4234.05	1	1	1	NA	3
FBgn0029148	NHP2	CG5258	FBgn0029148	446.956	513.897	402.118	459.179	181.024	326.45	388.227	420.56	200.727	267.998	430.649	404.393	253.737	480.427	234.363	1	0	1	NA	2
FBgn0027088	GlyRS	CG6778	FBgn0027088	897.116	882.471	916.969	927.257	437.474	432.089	796.563	816.73	741.954	879.451	922.113	806.647	434.782	889.794	810.702	1	1	0	NA	2
FBgn0087035	AGO2	CG7439	FBgn0087035	4488.25	4614.55	3773.64	2981.1	3409.28	2444.8	3870.53	3946.84	3834.83	3070.27	3377.37	3908.69	2927.04	4551.4	3452.55	1	1	1	NA	3
FBgn0036534	DCP2	CG6169	FBgn0036534	789.783	918.276	800.75	907.679	1259.62	1056.39	1476.38	1580.52	1102.42	746.752	854.215	1528.45	1158.01	854.029	924.587	1	0	1	NA	2
FBgn0263599	l(3)72Ab	CG5931	FBgn0263599	925.418	927.402	683.369	531.259	414.846	329.627	645.741	693.001	1050.93	931.489	607.314	669.371	372.237	926.41	991.208	1	1	0	yes	2
FBgn0263603	Zn72D	CG5215	FBgn0263603	947.312	1046.05	1409.74	1040.27	818.379	694.996	1769.64	1704.25	857.556	944.499	1225	1736.95	756.687	996.68	901.027	1	1	1	yes	3
FBgn0036621	roq	CG16807	FBgn0036621	1142.76	1345.12	1680.53	1915.91	1602.82	1339.95	1366.33	1576.95	721.987	861.237	1798.22	1471.64	1471.38	1243.94	791.612	1	0	1	NA	2
FBgn0027080	TyrRS	CG4561	FBgn0027080	2493.24	2319.56	2068.7	1810.02	2160.97	2072.28	2039.45	1902.93	1722.47	2315.71	1939.36	1971.19	2116.63	2406.4	2019.09	1	0	1	NA	2
FBgn0262732	mbf1	CG4143	FBgn0262732	1480.78	1512.21	1236.57	1289.44	584.556	506.752	889.29	966.038	769.278	991.333	1263.01	927.664	545.654	1496.49	880.306	1	1	0	NA	2
FBgn0036641	Smn	CG16725	FBgn0036641	292.097	360.149	244.06	208.232	429.932	548.054	219.53	217.715	158.69	163.921	226.146	218.623	488.993	326.123	161.306	1	0	1	yes	2
FBgn0036661	CG9705	CG9705	FBgn0036661	1992.88	1756.52	1681.69	1349.95	2021.43	1400.32	1068.6	908.338	1257.96	1207.29	1515.82	988.469	1710.88	1874.7	1232.63	1	0	1	NA	2
FBgn0025582	eIF3e	CG9677	FBgn0025582	5134.39	4972.59	4627.85	3929.72	2949.18	3015.09	3072.85	3148.55	3283.09	3413.73	4278.78	3110.7	2982.14	5053.49	3348.41	1	1	0	NA	2
FBgn0261872	scaf6	CG33522	FBgn0261872	578.32	583.4	786.804	600.67	709.01	627.482	666.409	646.603	626.352	658.287	693.737	656.506	668.246	580.86	642.32	1	0	1	yes	2
FBgn0260943	Rbp6	CG32169	FBgn0260943	665.895	1140.12	1555.01	1811.8	1625.44	1872.92	1766.29	1714.36	1660.46	1014.75	1683.41	1740.33	1749.18	903.009	1337.61	1	0	1	NA	2
FBgn0036733	U4-U6-60K	CG6322	FBgn0036733	129.761	102.499	132.49	139.711	165.939	101.668	242.432	228.423	146.079	161.319	136.101	235.427	133.803	116.13	153.699	1	0	1	yes	2
FBgn0036734	CG7564	CG7564	FBgn0036734	349.235	361.553	568.312	502.783	241.365	281.97	439.618	433.646	348.908	478.754	535.547	436.632	261.667	355.394	413.831	1	1	0	yes	2
FBgn0036735	Edc3	CG6311	FBgn0036735	187.967	141.111	170.842	217.131	211.194	168.388	326.781	282.554	196.523	169.125	193.987	304.667	189.791	164.539	182.824	1	1	0	NA	2
FBgn0004401	Pep	CG6143	FBgn0004401	2276.97	2481.03	2984.51	2358.19	2658.79	3402.7	2741.61	2588.79	2116.57	2318.32	2671.35	2665.2	3030.74	2379	2217.44	1	1	1	yes	3
FBgn0042134	Capr	CG18811	FBgn0042134	1226.06	1320.55	1609.64	1142.61	1482.13	926.132	1841.7	1711.39	2119.72	2258.47	1376.12	1776.54	1204.13	1273.3	2189.09	1	1	1	NA	3
FBgn0036825	RpL26	CG6846	FBgn0036825	28804.4	33890.5	72397.6	58281.9	33760.9	38809.4	23473.5	20836.4	30739.6	34868.4	65339.7	22155	36285.2	31347.5	32804	1	1	0	NA	2
FBgn0036853	mRpL21	CG9730	FBgn0036853	390.886	1090.98	737.992	965.521	241.365	339.158	266.452	278.39	298.463	408.502	851.757	272.421	290.262	740.933	353.483	1	0	1	NA	2
FBgn0040075	rept	CG9750	FBgn0040075	451.762	495.644	234.763	231.369	294.164	355.044	297.733	273.037	306.871	369.473	233.066	285.385	324.604	473.703	338.172	1	1	0	NA	2
FBgn0036889	CG14100	CG14100	FBgn0036889	294.767	448.607	285.899	312.348	316.792	220.016	206.123	230.207	189.167	171.727	299.124	218.165	268.404	371.687	180.447	1	1	1	NA	3
FBgn0005386	ash1	CG8887	FBgn0005386	356.711	319.431	418.389	423.584	411.075	374.901	673.671	628.163	351.009	424.114	420.986	650.917	392.988	338.071	387.562	1	0	1	NA	2
FBgn0262519	Mi-2	CG8103	FBgn0262519	2011.57	1710.18	2087.3	2181.99	1889.44	1430.5	2544.98	2573.33	2529.58	2604.53	2134.64	2559.15	1659.97	1860.88	2567.05	1	1	0	NA	2
FBgn0036974	eRF1	CG5605	FBgn0036974	3087.04	3399.3	2938.02	2899.23	3684.59	2258.94	1847.85	1761.35	2394.01	2305.31	2918.63	1804.6	2971.76	3243.17	2349.66	1	1	1	NA	3
FBgn0024887	kin17	CG5649	FBgn0024887	352.973	329.259	224.303	295.441	543.071	630.659	387.109	373.566	230.153	278.406	259.872	380.338	586.865	341.116	254.279	1	0	1	yes	2
FBgn0037008	mTerf3	CG5047	FBgn0037008	224.279	319.431	261.493	184.205	165.939	233.519	127.361	133.247	208.083	213.358	222.849	130.304	199.729	271.855	210.721	1	1	0	NA	2
FBgn0037081	barc	CG6049	FBgn0037081	851.193	854.389	927.429	817.801	1474.59	1131.06	603.846	574.031	744.056	611.452	872.615	588.939	1302.82	852.791	677.754	1	0	1	yes	2
FBgn0037135	CG7414	CG7414	FBgn0037135	10687.4	10374.8	14303.1	13356.2	11155.6	8864.97	9469.93	9067.91	7670.71	7813.58	13829.7	9268.92	10010.3	10531.1	7742.15	1	1	1	NA	3
FBgn0262737	mub	CG7437	FBgn0262737	3950.52	5540.54	2302.3	1975.54	4898.96	5399.52	8964.4	9509.88	10217.1	5716.43	2138.92	9237.14	5149.24	4745.53	7966.77	1	1	1	yes	3
FBgn0015075	Ddx1	CG9054	FBgn0015075	331.613	454.925	390.496	347.944	256.45	341.541	372.586	380.11	349.959	275.804	369.22	376.348	298.996	393.269	312.881	1	1	1	NA	3
FBgn0027086	IleRS	CG11471	FBgn0027086	703.275	908.447	569.474	504.563	388.447	203.336	413.364	466.958	731.445	957.508	537.018	440.161	295.891	805.861	844.477	1	1	0	NA	2
FBgn0037200	CG11109	CG11109	FBgn0037200	179.957	136.899	154.571	173.527	135.768	212.867	218.971	209.982	147.13	195.144	164.049	214.477	174.318	158.428	171.137	1	0	1	NA	2
FBgn0264492	CkIIalpha	CG17520	FBgn0264492	232.823	305.39	119.706	360.402	441.246	373.312	333.484	355.721	260.63	327.843	240.054	344.602	407.279	269.106	294.236	1	1	0	NA	2
FBgn0039977	CG17454	CG17454	FBgn0039977	79.0317	93.3721	77.8668	240.268	343.191	473.392	239.081	230.802	308.972	122.29	159.067	234.941	408.291	86.2019	215.631	1	1	1	yes	3
FBgn0044510	mRpS5	CG40049	FBgn0287187	236.027	429.652	242.898	500.113	248.908	178.713	431.239	304.564	332.093	171.727	371.506	367.901	213.811	332.839	251.91	1	1	1	NA	3
FBgn0024804	Dbp80	CG17023	FBgn0024804	114.81	143.919	36.0279	70.3006	245.136	198.57	141.884	126.108	160.792	171.727	53.1643	133.996	221.853	129.364	166.259	1	1	1	NA	3
FBgn0020660	eIF4B	CG10837	FBgn0020660	124.955	177.618	13.9463	154.839	369.59	344.718	180.986	147.523	483.426	187.339	84.3928	164.255	357.154	151.287	335.382	1	1	1	NA	3
FBgn0003256	rl	CG12559	FBgn0003256	104.13	87.7557	32.5414	102.336	60.3413	108.022	112.278	151.092	32.5787	104.077	67.4389	131.685	84.1818	95.9426	68.3279	1	1	0	NA	2
FBgn0002774	mle	CG11680	FBgn0002774	641.331	727.319	479.985	626.477	1071.06	739.476	1068.6	898.225	584.315	551.608	553.231	983.413	905.267	684.325	567.962	1	1	1	NA	3
FBgn0033060	CG7849	CG7849	FBgn0033060	223.745	287.839	292.872	195.774	226.28	269.261	268.128	255.786	244.866	234.173	244.323	261.957	247.771	255.792	239.52	1	0	1	NA	2
FBgn0033062	Ars2	CG7843	FBgn0033062	873.62	1020.77	1055.27	783.986	727.867	622.717	713.331	806.618	895.389	1048.58	919.628	759.975	675.292	947.197	971.983	1	1	0	yes	2
FBgn0263144	bin3	CG8276	FBgn0263144	707.547	822.095	1001.81	1004.68	1964.86	1931.69	1380.86	1320.57	1285.28	1519.52	1003.24	1350.71	1948.28	764.821	1402.4	1	0	1	NA	2
FBgn0026761	Trap1	CG3152	FBgn0026761	1199.89	1569.77	1618.93	1826.04	946.604	906.275	928.392	977.935	1407.19	1238.52	1722.48	953.164	926.439	1384.83	1322.85	1	1	0	NA	2
FBgn0033160	Dhx15	CG11107	FBgn0033160	981.488	876.153	658.963	527.7	577.013	506.752	709.98	777.47	564.348	660.889	593.331	743.725	541.882	928.82	612.618	1	1	1	yes	3
FBgn0033169	CG11123	CG11123	FBgn0033169	297.437	303.284	148.761	165.518	143.311	169.182	183.779	139.79	197.574	150.912	157.139	161.785	156.246	300.36	174.243	1	0	1	NA	2
FBgn0033184	mEFTu2	CG12736	FBgn0033184	1974.19	2839.07	4595.31	4034.72	1425.56	1656.08	1071.39	1021.95	1348.34	1290.55	4315.01	1046.67	1540.82	2406.63	1319.45	1	0	1	NA	2
FBgn0033210	U2A	CG1406	FBgn0033210	118.548	140.409	102.273	148.61	67.8839	196.188	146.912	135.626	105.093	127.494	125.442	141.269	132.036	129.478	116.293	1	0	1	yes	2
FBgn0026722	drosha	CG8730	FBgn0026722	395.158	452.819	447.444	270.524	214.966	158.856	290.472	333.711	449.797	418.91	358.984	312.092	186.911	423.989	434.353	1	0	1	NA	2
FBgn0027548	nito	CG2910	FBgn0027548	554.29	469.668	503.229	574.863	429.932	463.066	555.248	557.375	360.468	478.754	539.046	556.312	446.499	511.979	419.611	1	1	1	yes	3
FBgn0020279	lig	CG8715	FBgn0020279	2903.35	3311.55	4094.4	3380.66	3243.34	2704.53	4843.06	4578.57	3021.41	3733.76	3737.53	4710.81	2973.94	3107.45	3377.59	1	1	0	NA	2
FBgn0033264	Nup50	CG2158	FBgn0033264	707.013	641.67	431.173	336.375	154.625	367.752	264.776	276.606	415.116	559.414	383.774	270.691	261.188	674.341	487.265	1	1	0	NA	2
FBgn0005648	Pabp2	CG2163	FBgn0005648	624.243	640.265	391.659	493.884	554.385	622.717	620.045	613.291	337.347	447.531	442.771	616.668	588.551	632.254	392.439	1	1	1	yes	3
FBgn0021995	Rs1	CG2173	FBgn0021995	805.269	836.136	564.825	565.965	494.044	494.043	490.45	483.019	565.399	556.812	565.395	486.735	494.044	820.702	561.105	1	0	1	NA	2
FBgn0033351	AIMP1	CG8235	FBgn0033351	843.717	1187.16	1147.08	882.762	1463.28	1701.35	598.818	572.247	895.389	843.024	1014.92	585.533	1582.31	1015.44	869.207	1	0	1	NA	2
FBgn0033352	PAN2	CG8232	FBgn0033352	1086.15	1102.21	741.478	670.971	750.495	682.288	847.954	924.993	984.718	913.276	706.224	886.474	716.391	1094.18	948.997	1	1	0	NA	2
FBgn0010220	Dbp45A	CG12759	FBgn0010220	456.034	480.901	253.358	152.17	282.85	271.644	228.467	230.802	320.533	291.416	202.764	229.635	277.247	468.468	305.974	1	0	1	yes	2
FBgn0033375	CG8078	CG8078	FBgn0033375	266.465	343.3	266.142	343.494	256.45	427.323	347.449	333.711	203.88	205.552	304.818	340.58	341.887	304.883	204.716	1	0	1	NA	2
FBgn0033378	tsu	CG8781	FBgn0033378	636.525	692.217	592.718	646.054	686.382	872.121	615.576	578.79	418.269	509.977	619.386	597.183	779.251	664.371	464.123	1	0	1	yes	2
FBgn0033380	Phax	CG8069	FBgn0033380	311.855	317.325	280.088	299	369.59	483.717	307.23	303.969	203.88	291.416	289.544	305.599	426.654	314.59	247.648	1	0	1	NA	2
FBgn0003612	Su(var)2-10	CG8068	FBgn0003612	411.712	334.174	435.822	323.917	452.56	261.319	507.767	524.064	422.473	405.9	379.869	515.915	356.939	372.943	414.186	1	0	1	NA	2
FBgn0085436	Not1	CG34407	FBgn0085436	6250.44	5726.59	3995.62	5024.27	7188.15	7634.63	4859.26	4946.19	8153.09	7797.97	4509.94	4902.72	7411.39	5988.51	7975.53	1	1	0	NA	2
FBgn0027619	eIF3j	CG12131	FBgn0027619	5380.03	4792.86	2598.66	3164.42	4827.3	4248.61	2420.41	2486.48	2350.92	2854.31	2881.54	2453.44	4537.96	5086.45	2602.62	1	0	1	NA	2
FBgn0286784	TER94	CG2331	FBgn0286784	21581.5	19521.8	6300.24	6226.5	3005.75	2645.75	5170.4	5221.6	8446.3	7014.79	6263.37	5196	2825.75	20551.7	7730.54	1	1	0	NA	2
FBgn0004907	14-3-3zeta	CG17870	FBgn0004907	22516	25706.1	19412.1	23800.8	15126.8	13906.3	13831.5	15507.2	14379.8	17315.8	21606.4	14669.3	14516.5	24111.1	15847.8	1	1	0	NA	2
FBgn0033528	trsn	CG11761	FBgn0033528	154.859	147.43	76.7047	105.006	199.88	193.01	198.303	208.793	107.195	119.689	90.8553	203.548	196.445	151.144	113.442	1	1	0	NA	2
FBgn0283521	lola	CG12052	FBgn0283521	4057.32	3869.67	5802.82	6234.51	7267.35	7359.02	9218.56	9144.05	6848.89	6382.52	6018.67	9181.31	7313.18	3963.5	6615.71	1	1	0	NA	2
FBgn0033554	Lsm10	CG12938	FBgn0033554	45.9238	65.9923	69.7315	15.128	218.737	149.325	26.8128	25.5786	127.162	75.4558	42.4297	26.1957	184.031	55.958	101.309	1	0	1	NA	2
FBgn0013756	Mtor	CG8274	FBgn0013756	529.726	423.333	763.56	767.968	411.075	320.095	810.528	732.262	590.621	785.781	765.764	771.395	365.585	476.53	688.201	1	1	0	NA	2
FBgn0284245	eEF1alpha1	CG8280	FBgn0284245	43016.2	31697.4	64600.4	55054.3	61110.6	29878.5	44808	47374.5	44902.9	69390.7	59827.4	46091.3	45494.6	37356.8	57146.8	1	1	1	NA	3
FBgn0033688	Prp8	CG8877	FBgn0033688	1093.63	1066.41	1177.3	1220.92	2164.74	816.521	1042.9	1071.92	1102.42	1363.41	1199.11	1057.41	1490.63	1080.02	1232.92	1	1	0	yes	2
FBgn0023167	SmD3	CG8427	FBgn0023167	239.765	261.863	428.849	317.688	731.638	958.698	304.995	254.001	432.982	395.493	373.268	279.498	845.168	250.814	414.237	1	0	1	yes	2
FBgn0000426	SmF	CG16792	FBgn0000426	148.451	177.618	140.625	192.214	852.321	172.359	105.575	84.4688	133.468	158.717	166.42	95.0221	512.34	163.034	146.093	1	1	1	yes	3
FBgn0033741	CG8545	CG8545	FBgn0033741	585.262	527.236	425.362	411.125	150.853	250.993	274.831	262.924	484.477	541.2	418.244	268.878	200.923	556.249	512.839	1	0	1	NA	2
FBgn0000181	bic	CG3644	FBgn0000181	5839.27	5050.52	8658.33	9429.18	4393.6	5207.31	6473.05	6075.81	5764.33	7225.55	9043.76	6274.43	4800.45	5444.89	6494.94	1	1	0	NA	2
FBgn0010488	NAT1	CG3845	FBgn0010488	11990.4	9371.61	9037.2	9746.87	10703	8499.61	10283.3	10420.6	7906.12	10800.6	9392.04	10351.9	9601.32	10681	9353.36	1	1	1	NA	3
FBgn0027079	ValRS	CG4062	FBgn0027079	870.95	715.384	1098.27	946.834	441.246	474.98	826.168	828.033	783.991	882.053	1022.55	827.101	458.113	793.167	833.022	1	1	0	NA	2
FBgn0033816	CG4679	CG4679	FBgn0033816	434.674	1113.44	783.317	624.697	154.625	232.724	402.75	455.656	506.547	559.414	704.007	429.203	193.674	774.059	532.98	1	1	0	NA	2
FBgn0024556	mEFTu1	CG6050	FBgn0024556	6789.25	12511.9	34414.8	34526.5	4156.01	5136.62	3643.18	3609.56	4834.26	4225.53	34470.7	3626.37	4646.31	9650.55	4529.89	1	1	1	NA	3
FBgn0262739	AGO1	CG6671	FBgn0262739	2011.57	2214.25	2026.86	2936.61	3609.16	3891.98	4078.33	4626.75	2805.97	2994.82	2481.74	4352.54	3750.57	2112.91	2900.39	1	1	1	NA	3
FBgn0275436	PheRS-m	CG13348	FBgn0275436	2734.6	3230.81	7411.3	7778.45	1961.09	1820.49	1036.2	999.35	1735.08	1329.58	7594.88	1017.78	1890.79	2982.71	1532.33	1	0	1	NA	2
FBgn0033889	CG6701	CG6701	FBgn0033889	1097.37	846.667	1100.6	1193.33	641.126	478.952	1011.62	1068.95	1205.41	1868.18	1146.96	1040.29	560.039	972.016	1536.8	1	1	0	NA	2
FBgn0086895	pea	CG8241	FBgn0086895	261.125	281.52	205.708	136.152	418.618	200.953	227.35	240.32	318.431	247.183	170.93	233.835	309.785	271.323	282.807	1	1	1	yes	3
FBgn0033902	eIF3m	CG8309	FBgn0033902	4987.54	4674.22	4689.44	3842.51	3171.69	3088.96	2612.57	2841.01	3905.24	3983.55	4265.98	2726.79	3130.32	4830.88	3944.4	1	1	0	NA	2
FBgn0033926	Arc1	CG12505	FBgn0033926	81660	71376.3	3994.45	3280.99	41133.9	33839.6	3160.56	3308.56	28554.7	25249.1	3637.72	3234.56	37486.7	76518.1	26901.9	1	1	0	NA	2
FBgn0003742	tra2	CG10128	FBgn0003742	323.603	373.488	162.707	189.545	260.222	317.713	218.971	216.526	202.829	218.562	176.126	217.748	288.967	348.545	210.695	1	0	1	yes	2
FBgn0264962	Pcf11	CG10228	FBgn0264962	2328.76	2045.76	3491.22	3396.68	2262.8	2449.56	2337.18	2424.61	2038.8	2313.11	3443.95	2380.9	2356.18	2187.26	2175.95	1	0	1	NA	2
FBgn0261854	aPKC	CG42783	FBgn0261854	543.61	523.024	499.742	508.122	445.017	220.81	921.689	949.977	691.51	728.539	503.932	935.833	332.914	533.317	710.024	1	1	0	NA	2
FBgn0034029	eIF2Bgamma	CG8190	FBgn0034029	447.49	530.044	316.116	281.203	414.846	395.552	311.14	315.271	559.093	546.404	298.659	313.205	405.199	488.767	552.749	1	0	1	NA	2
FBgn0023441	fus	CG8205	FBgn0023441	519.58	478.093	1058.76	745.721	735.409	575.06	3141.56	3650.01	698.866	1053.78	902.239	3395.78	655.235	498.836	876.323	1	0	1	NA	2
FBgn0034065	Rrp42	CG8395	FBgn0034065	143.645	160.066	99.9485	89.878	128.225	101.668	109.485	123.729	74.6158	78.0578	94.9133	116.607	114.947	151.856	76.3368	1	0	1	NA	2
FBgn0027091	CysRS	CG8431	FBgn0027091	631.185	446.501	827.48	813.352	362.048	474.186	410.012	450.897	404.607	660.889	820.416	430.454	418.117	538.843	532.748	1	0	1	NA	2
FBgn0034086	CG8441	CG8441	FBgn0034086	206.123	218.336	188.275	161.958	188.566	324.067	192.717	181.43	208.083	161.319	175.117	187.073	256.317	212.23	184.701	1	1	0	NA	2
FBgn0034087	clu	CG8443	FBgn0034087	1040.76	2747.1	4792.88	4224.27	652.44	1317.71	2606.98	2841.01	2279.46	1436.26	4508.57	2724	985.076	1893.93	1857.86	1	1	1	NA	3
FBgn0034138	RpS15	CG8332	FBgn0034138	36173	39071.6	72319.7	74058.6	83353.9	43225.6	26417.3	27843.2	30248.8	32740	73189.2	27130.2	63289.8	37622.3	31494.4	1	0	1	NA	2
FBgn0014870	Psi	CG8912	FBgn0014870	663.759	612.886	775.182	865.855	652.44	583.003	1365.78	1385.41	874.371	858.635	820.518	1375.59	617.721	638.323	866.503	1	1	1	yes	3
FBgn0028737	eEF1beta	CG6341	FBgn0028737	12012.3	13840.8	22591.8	20943.4	11166.9	11023.8	7064.05	6953.21	11199.7	12481.4	21767.6	7008.63	11095.4	12926.6	11840.6	1	0	1	NA	2
FBgn0026402	NiPp1	CG8980	FBgn0026402	106.266	157.258	115.057	96.1072	150.853	117.554	139.091	129.083	131.366	132.698	105.582	134.087	134.203	131.762	132.032	1	0	1	NA	2
FBgn0034181	CG8963	CG8963	FBgn0034181	2937.52	2799.06	1264.46	1191.55	1583.96	1305.8	1498.16	1501.4	1697.25	1428.46	1228.01	1499.78	1444.88	2868.29	1562.85	1	1	1	NA	3
FBgn0265487	mbl	CG33197	FBgn0265487	605.02	525.13	1013.43	1539.49	1240.77	2648.93	9758.17	10916.7	2676.71	1704.26	1276.46	10337.4	1944.85	565.075	2190.49	1	0	1	yes	2
FBgn0022987	qkr54B	CG4816	FBgn0022987	187.433	258.353	146.436	189.545	252.679	274.027	463.079	554.401	241.713	239.377	167.99	508.74	263.353	222.893	240.545	1	1	1	NA	3
FBgn0034237	eIF3b	CG4878	FBgn0034237	8265.75	7939.43	6630.3	6122.38	3699.67	3349.48	4727.98	4622.59	5838.95	5458.84	6376.34	4675.29	3524.58	8102.59	5648.89	1	1	1	NA	3
FBgn0028382	cyp33	CG4886	FBgn0028382	159.131	153.748	130.165	169.967	124.454	216.045	176.517	188.568	137.671	182.135	150.066	182.543	170.249	156.44	159.903	1	0	1	yes	2
FBgn0034246	Dcr-2	CG6493	FBgn0034246	356.711	320.835	213.843	258.066	124.454	128.674	323.429	375.351	520.209	681.704	235.954	349.39	126.564	338.773	600.957	1	1	1	NA	3
FBgn0034258	eIF3c	CG4954	FBgn0034258	6629.05	5732.2	6665.17	5721.05	3809.04	3648.13	5385.46	5763.51	5886.24	6184.78	6193.11	5574.48	3728.59	6180.63	6035.51	1	1	1	NA	3
FBgn0003520	stau	CG5753	FBgn0003520	1088.29	1385.14	2273.25	1957.74	1946.01	1859.41	2599.16	2623.29	2548.5	1808.34	2115.49	2611.23	1902.71	1236.71	2178.42	1	1	1	NA	3
FBgn0265297	pAbp	CG5119	FBgn0265297	42832	43701.6	45691.6	60826.1	54782.3	55771.3	75905.8	82561.8	61970	54208.5	53258.8	79233.8	55276.8	43266.8	58089.2	1	1	1	yes	3
FBgn0022238	lolal	CG5738	FBgn0022238	813.813	1010.95	615.962	628.256	1101.23	1204.13	1302.1	1312.24	1004.69	1160.46	622.109	1307.17	1152.68	912.379	1082.57	1	1	0	NA	2
FBgn0027835	Dp1	CG5170	FBgn0027835	3443.22	3476.53	7684.41	6905.48	2251.48	1700.56	6650.68	6914.55	5280.91	5885.55	7294.95	6782.62	1976.02	3459.87	5583.23	1	1	1	NA	3
FBgn0034351	rswl	CG5190	FBgn0034351	363.119	653.604	2402.25	2149.06	324.334	684.671	483.747	537.15	491.834	353.862	2275.66	510.449	504.502	508.361	422.848	1	1	0	NA	2
FBgn0040273	Spt5	CG7626	FBgn0040273	994.304	956.888	851.887	976.2	1086.14	976.966	1143.45	1121.29	740.903	863.839	914.043	1132.37	1031.55	975.596	802.371	1	1	0	NA	2
FBgn0013325	RpL11	CG7726	FBgn0013325	32192.1	33781.7	52908.8	53018.2	23487.8	28984.1	21513.3	22424.1	24786.1	26841.5	52963.5	21968.7	26236	32986.9	25813.8	1	0	1	NA	2
FBgn0003435	sm	CG9218	FBgn0003435	2295.12	2635.48	645.016	1075.87	1565.1	1766.48	2359.52	2507.3	2262.65	1420.65	860.442	2433.41	1665.79	2465.3	1841.65	1	0	1	NA	2
FBgn0015949	hrg	CG9854	FBgn0015949	674.439	666.943	762.398	737.712	871.177	708.499	886.497	937.485	832.334	879.451	750.055	911.991	789.838	670.691	855.892	1	0	1	NA	2
FBgn0010411	RpS18	CG8900	FBgn0010411	32146.1	34296.3	59526.3	58995.6	33463	41297.1	24662.2	25680.9	24946.9	30720.9	59260.9	25171.5	37380	33221.2	27833.9	1	1	1	NA	3
FBgn0034496	CG9143	CG9143	FBgn0287774	480.064	425.44	242.898	265.185	124.454	143.765	161.435	152.877	140.824	241.979	254.041	157.156	134.109	452.752	191.402	1	0	1	NA	2
FBgn0267791	HnRNP-K	CG13425	FBgn0267791	1457.81	1437.79	1019.24	1035.82	2462.68	1921.37	2129.38	2184.29	1379.87	1326.98	1027.53	2156.84	2192.02	1447.8	1353.42	1	1	1	yes	3
FBgn0250850	rig	CG30149	FBgn0250850	207.191	215.528	125.517	116.574	82.9693	111.199	166.463	171.912	233.306	218.562	121.046	169.187	97.0843	211.36	225.934	1	1	0	yes	2
FBgn0000615	exu	CG8994	FBgn0000615	460.306	169.193	109.246	195.774	109.369	106.434	18.4338	13.6816	427.727	122.29	152.51	16.0577	107.901	314.75	275.009	1	1	1	yes	3
FBgn0034564	CG9344	CG9344	FBgn0034564	74.7597	98.2864	132.49	165.518	162.167	142.176	111.161	114.806	119.806	124.892	149.004	112.984	152.172	86.523	122.349	1	0	1	yes	2
FBgn0034572	CG9346	CG9346	FBgn0034572	579.388	607.269	488.121	364.851	426.16	559.968	422.86	368.808	400.403	346.056	426.486	395.834	493.064	593.329	373.23	1	0	1	NA	2
FBgn0011824	CG4038	CG4038	FBgn0011824	362.051	454.925	327.738	250.947	445.017	361.398	311.698	285.528	546.482	535.997	289.342	298.613	403.207	408.488	541.239	1	1	1	NA	3
FBgn0002736	mago	CG9401	FBgn0002736	483.268	633.947	505.553	500.113	252.679	300.238	265.335	259.355	312.125	304.425	502.833	262.345	276.459	558.608	308.275	1	0	1	yes	2
FBgn0034598	CG4266	CG4266	FBgn0034598	765.219	866.324	1043.65	935.265	908.89	897.538	990.955	955.926	894.339	954.907	989.457	973.44	903.214	815.772	924.623	1	0	1	yes	2
FBgn0261067	LSm1	CG4279	FBgn0261067	315.059	326.451	341.684	457.399	509.13	677.522	299.968	345.608	229.102	223.766	399.542	322.788	593.326	320.755	226.434	1	1	1	NA	3
FBgn0034646	Rae1	CG9862	FBgn0034646	426.664	478.093	491.607	439.601	373.362	404.289	411.129	367.023	341.551	348.658	465.604	389.076	388.825	452.379	345.105	1	1	0	NA	2
FBgn0034654	eIF3k	CG10306	FBgn0034654	2882.52	2808.18	3004.27	2649.18	2485.31	2833.2	2193.06	2180.72	2292.07	2591.52	2826.72	2186.89	2659.25	2845.35	2441.79	1	1	1	NA	3
FBgn0004362	HmgD	CG17950	FBgn0004362	269.135	214.826	368.415	438.712	644.897	374.901	339.628	291.477	294.259	314.833	403.563	315.553	509.899	241.98	304.546	1	1	0	NA	2
FBgn0265192	Snp	CG44248	FBgn0265192	666.963	530.044	661.287	746.611	603.413	831.613	969.17	854.801	743.005	746.752	703.949	911.985	717.513	598.504	744.879	1	0	1	NA	2
FBgn0022984	qkr58E-3	CG3584	FBgn0022984	266.999	272.394	543.906	450.28	497.816	507.546	486.54	539.53	369.926	372.075	497.093	513.035	502.681	269.696	371.001	1	1	1	yes	3
FBgn0022986	qkr58E-1	CG3613	FBgn0022986	244.037	315.92	271.953	231.369	301.706	246.227	201.096	204.629	233.306	169.125	251.661	202.862	273.967	279.979	201.215	1	1	1	yes	3
FBgn0022985	qkr58E-2	CG5821	FBgn0022985	1400.14	1934.14	1460.87	1340.16	1757.44	1425.74	1355.16	1252.16	1508.08	1532.53	1400.52	1303.66	1591.59	1667.14	1520.31	1	1	1	NA	3
FBgn0034743	RpS16	CG4046	FBgn0034743	32131.7	34628.4	68384.5	59582	30706.2	36938.9	23020.4	22763.8	27091.8	30572.6	63983.3	22892.1	33822.5	33380.1	28832.2	1	1	0	NA	2
FBgn0010078	RpL23	CG3661	FBgn0010078	42556.4	47088.3	72863.6	97911	42725.4	55637	36951.3	35748.2	31352.3	39715.8	85387.3	36349.8	49181.2	44822.4	35534	1	1	0	NA	2
FBgn0010660	Nup214	CG3820	FBgn0010660	471.52	530.044	460.228	307.899	445.017	539.317	313.933	325.978	522.311	385.085	384.063	319.956	492.167	500.782	453.698	1	1	0	NA	2
FBgn0034802	CNBP	CG3800	FBgn0034802	8622.46	10461.9	11363.9	14906.4	12950.7	16878.5	6885.85	6603.44	8847.75	9080.72	13135.2	6744.65	14914.6	9542.17	8964.23	1	1	0	NA	2
FBgn0003062	Fib	CG9888	FBgn0003062	996.974	961.802	427.687	541.938	380.904	461.477	325.105	306.348	612.69	858.635	484.812	315.727	421.191	979.388	735.663	1	1	1	NA	3
FBgn0034858	eIF2Bdelta	CG10315	FBgn0034858	554.29	697.131	799.588	616.688	561.928	753.773	566.978	421.749	579.061	525.589	708.138	494.364	657.851	625.71	552.325	1	1	1	NA	3
FBgn0034879	Rrp4	CG3931	FBgn0034879	333.749	309.602	196.41	212.682	411.075	335.187	234.612	230.207	231.204	301.823	204.546	232.41	373.131	321.675	266.514	1	0	1	NA	2
FBgn0015903	apt	CG5393	FBgn0015903	258.455	198.679	579.934	393.328	263.993	150.119	689.87	588.903	470.815	364.27	486.631	639.386	207.056	228.567	417.542	1	0	1	NA	2
FBgn0000562	egl	CG4051	FBgn0000562	3674.97	2676.2	2774.15	2833.38	3609.16	2903.1	3362.21	3020.65	2193.28	1878.59	2803.77	3191.43	3256.13	3175.59	2035.94	1	1	1	NA	3
FBgn0021895	ytr	CG18426	FBgn0021895	583.126	657.115	592.718	402.226	403.532	309.77	424.535	411.042	711.477	546.404	497.472	417.789	356.651	620.12	628.941	1	0	1	yes	2
FBgn0034915	eIF6	CG17611	FBgn0034915	665.895	716.788	534.608	473.417	539.3	773.63	384.316	435.431	540.176	369.473	504.013	409.874	656.465	691.342	454.825	1	0	1	NA	2
FBgn0034918	Pym	CG30176	FBgn0034918	139.373	148.834	149.923	113.905	192.338	223.193	216.737	157.041	150.283	169.125	131.914	186.889	207.765	144.104	159.704	1	1	1	NA	3
FBgn0025790	TBPH	CG10327	FBgn0025790	651.477	634.649	786.804	797.334	663.754	765.687	1038.44	1070.73	543.329	660.889	792.069	1054.58	714.721	643.063	602.109	1	1	1	NA	3
FBgn0034921	DCP1	CG11183	FBgn0034921	193.841	258.353	362.604	278.533	301.706	409.055	343.539	338.47	262.732	228.969	320.568	341.004	355.381	226.097	245.851	1	1	0	NA	2
FBgn0013764	Chi	CG3924	FBgn0013764	611.428	638.861	854.211	778.646	1221.91	1539.32	783.156	764.978	476.07	647.879	816.429	774.067	1380.61	625.144	561.975	1	1	0	NA	2
FBgn0285952	eEF5	CG3186	FBgn0285952	5491.63	9592.75	772.857	2742.61	4216.35	3578.24	3306.91	3842.74	9373.21	10368.7	1757.74	3574.82	3897.29	7542.19	9870.94	1	1	1	NA	3
FBgn0034968	RpL12	CG3195	FBgn0034968	36421.3	38336.6	71465.5	71016.1	28462.2	43717.2	22534.5	26431	24644.2	30413.9	71240.8	24482.7	36089.7	37379	27529.1	1	1	0	NA	2
FBgn0086129	snama	CG3231	FBgn0086129	495.55	495.644	542.744	562.405	388.447	369.341	626.748	598.42	484.477	520.385	552.574	612.584	378.894	495.597	502.431	1	1	0	NA	2
FBgn0015544	spag	CG13570	FBgn0015544	273.941	277.308	147.598	122.804	165.939	163.622	155.291	169.533	258.528	184.737	135.201	162.412	164.78	275.624	221.632	1	1	0	NA	2
FBgn0259937	Nop60B	CG3333	FBgn0259937	886.436	785.589	908.834	968.191	535.529	681.493	378.172	371.782	914.306	915.878	938.512	374.977	608.511	836.013	915.092	1	1	1	NA	3
FBgn0035016	CG4612	CG4612	FBgn0035016	1012.46	1192.07	1135.46	1660.52	2685.19	2498.02	2551.12	2472.8	2433.95	1566.36	1397.99	2511.96	2591.6	1102.27	2000.15	1	1	1	NA	3
FBgn0035024	CG11414	CG11414	FBgn0035024	2092.2	1899.03	3141.4	2794.23	1587.73	1404.29	1430.57	1372.32	1368.31	1209.9	2967.82	1401.45	1496.01	1995.62	1289.1	1	1	0	NA	2
FBgn0260456	CG4806	CG4806	FBgn0260456	515.842	501.26	526.473	492.994	384.676	351.072	500.505	468.148	458.204	320.037	509.734	484.326	367.874	508.551	389.12	1	1	1	NA	3
FBgn0035047	Pof	CG3691	FBgn0035047	692.061	293.455	195.248	277.643	165.939	360.604	151.939	124.919	345.755	148.31	236.446	138.429	263.271	492.758	247.032	1	0	1	NA	2
FBgn0035063	CG3594	CG3594	FBgn0035063	186.365	177.618	174.329	186.875	181.024	181.89	194.951	205.224	107.195	140.504	180.602	200.087	181.457	181.991	123.849	1	0	1	NA	2
FBgn0035064	TyrRS-m	CG16912	FBgn0035064	645.069	1194.18	1584.07	1556.4	369.59	541.7	338.511	367.618	564.348	385.085	1570.23	353.065	455.645	919.624	474.716	1	0	1	NA	2
FBgn0285950	RpL19	CG2746	FBgn0285950	44734.1	50185.7	97163.9	90230.4	46523.1	62001.6	43817.1	39326.8	36271.7	44659.4	93697.1	41571.9	54262.4	47459.9	40465.6	1	1	0	NA	2
FBgn0260400	elav	CG4262	FBgn0260400	129.761	143.217	273.115	369.301	207.423	200.159	499.946	493.726	402.505	314.833	321.208	496.836	203.791	136.489	358.669	1	1	1	NA	3
FBgn0003575	su(sable)	CG6222	FBgn0003575	660.021	723.809	2023.38	1555.51	720.324	636.219	1103.23	1117.73	730.394	962.712	1789.44	1110.48	678.272	691.915	846.553	1	0	1	NA	2
FBgn0015288	RpL22	CG7434	FBgn0015288	12918.5	15888	28238.9	20000.1	14078.4	12892.8	11987.5	8501.61	14442.9	13930.7	24119.5	10244.6	13485.6	14403.2	14186.8	1	1	0	NA	2
FBgn0003638	su(w[a])	CG3019	FBgn0003638	1342.47	1340.91	1679.37	1050.06	1059.74	1096.11	1307.68	1242.05	1828.61	1516.92	1364.71	1274.86	1077.93	1341.69	1672.77	1	0	1	yes	2
FBgn0024360	MTPAP	CG11418	FBgn0024360	262.193	380.509	839.102	786.655	226.28	274.821	301.644	305.159	327.889	236.775	812.879	303.401	250.551	321.351	282.332	1	1	0	NA	2
FBgn0024987	ssx	CG3056	FBgn0024987	792.453	865.622	913.483	732.372	908.89	675.139	998.776	1047.53	1112.93	853.431	822.928	1023.15	792.015	829.037	983.181	1	1	1	NA	3
FBgn0027794	Lrpprc2	CG14786	FBgn0027794	738.519	1093.79	2222.11	2005.79	610.955	654.488	876.442	914.881	813.417	777.976	2113.95	895.662	632.722	916.153	795.696	1	1	0	NA	2
FBgn0266284	Ns3	CG14788	FBgn0266284	593.806	573.571	557.852	430.703	267.764	398.729	432.356	422.344	565.399	515.181	494.277	427.35	333.247	583.688	540.29	1	1	0	NA	2
FBgn0026086	Adar	CG12598	FBgn0026086	436.276	457.032	1154.06	1449.62	837.235	892.772	741.82	885.138	862.811	398.095	1301.84	813.479	865.004	446.654	630.453	1	0	1	NA	2
FBgn0023519	mRpL16	CG3109	FBgn0023519	2040.94	3397.2	4503.49	6097.47	1331.28	2085.78	739.586	716.795	959.496	993.935	5300.48	728.19	1708.53	2719.07	976.716	1	1	1	NA	3
FBgn0023512	eIF2Bepsilon	CG3806	FBgn0023512	624.777	827.712	1004.13	890.771	671.297	567.911	569.213	628.758	493.936	601.045	947.452	598.985	619.604	726.245	547.49	1	0	1	NA	2
FBgn0023542	Nmd3	CG3460	FBgn0023542	972.41	920.382	749.614	743.051	671.297	910.246	746.847	715.606	529.667	533.395	746.332	731.227	790.772	946.396	531.531	1	0	1	NA	2
FBgn0001330	kz	CG3228	FBgn0001330	208.793	200.083	132.49	104.116	71.6553	83.3995	141.326	154.661	172.352	145.708	118.303	147.993	77.5274	204.438	159.03	1	0	1	NA	2
FBgn0029629	eIF3g1	CG8636	FBgn0029629	4771.8	4455.18	5426.27	5404.25	4650.05	4849.88	4304.57	3888.54	3457.55	4129.26	5415.26	4096.55	4749.97	4613.49	3793.4	1	1	1	NA	3
FBgn0024996	eIF2Bbeta	CG2677	FBgn0024996	1237.27	1515.72	1303.98	1090.99	1395.39	1204.92	863.036	823.869	764.024	715.529	1197.49	843.452	1300.16	1376.49	739.777	1	0	1	NA	2
FBgn0024973	CG2701	CG2701	FBgn0024973	705.411	696.429	1025.05	865.855	1365.22	1650.52	858.567	768.548	885.931	671.297	945.454	813.557	1507.87	700.92	778.614	1	1	0	NA	2
FBgn0029666	CG10803	CG10803	FBgn0029666	152.723	166.385	146.436	202.893	324.334	223.193	274.272	426.508	273.241	218.562	174.665	350.39	273.764	159.554	245.901	1	1	1	NA	3
FBgn0026079	Nsun2	CG6133	FBgn0026079	618.904	567.253	375.388	387.988	211.194	223.987	361.414	323.599	385.69	338.25	381.688	342.506	217.591	593.078	361.97	1	1	1	NA	3
FBgn0266570	NO66	CG2982	FBgn0266570	915.272	956.888	400.956	422.694	275.307	301.827	227.909	229.018	538.074	444.929	411.825	228.463	288.567	936.08	491.502	1	1	0	NA	2
FBgn0029714	CG3527	CG3527	FBgn0029714	201.317	231.675	149.923	147.72	150.853	145.353	153.615	148.118	133.468	161.319	148.822	150.866	148.103	216.496	147.394	1	0	1	NA	2
FBgn0029715	CG11444	CG11444	FBgn0029715	1311.5	1321.95	1919.94	1736.16	1500.99	2095.31	1179.76	1045.15	828.13	884.655	1828.05	1112.46	1798.15	1316.73	856.392	1	1	0	NA	2
FBgn0022942	Cbp80	CG7035	FBgn0022942	720.363	756.805	428.849	460.959	354.505	316.918	630.659	622.809	826.028	549.006	444.904	626.734	335.712	738.584	687.517	1	1	1	yes	3
FBgn0003449	snf	CG4528	FBgn0003449	726.237	819.287	689.18	671.861	1289.79	1093.73	568.654	461.01	662.084	619.258	680.52	514.832	1191.76	772.762	640.671	1	1	1	yes	3
FBgn0014024	Rnp4F	CG3312	FBgn0014024	870.95	893.002	1188.92	1447.84	1203.05	1186.66	611.666	644.819	975.26	759.762	1318.38	628.242	1194.86	881.976	867.511	1	1	1	NA	3
FBgn0263987	spoon	CG3249	FBgn0263987	1491.46	2351.15	5319.35	10481	1206.83	1595.71	2058.44	2312.78	2072.43	2104.96	7900.19	2185.61	1401.27	1921.3	2088.69	1	1	1	NA	3
FBgn0028474	CG4119	CG4119	FBgn0028474	570.31	633.947	728.694	640.715	622.269	362.987	743.496	716.795	603.232	533.395	684.704	730.146	492.628	602.128	568.313	1	0	1	yes	2
FBgn0014340	mof	CG3025	FBgn0014340	106.266	113.731	141.787	108.566	150.853	127.085	198.861	180.24	179.708	145.708	125.176	189.551	138.969	109.998	162.708	1	0	1	NA	2
FBgn0029823	Shmt	CG3011	FBgn0029823	1269.31	1510.1	692.666	550.837	2704.04	1787.93	783.156	844.688	2804.92	2320.92	621.751	813.922	2245.99	1389.71	2562.92	1	1	0	NA	2
FBgn0029833	MCTS1	CG5941	FBgn0029833	480.064	647.286	682.207	541.048	901.348	1311.36	347.449	334.901	270.088	369.473	611.627	341.175	1106.35	563.675	319.781	1	0	1	NA	2
FBgn0015818	Spx	CG3780	FBgn0015818	165.005	169.895	198.735	194.884	116.911	174.742	109.485	119.565	108.245	143.106	196.809	114.525	145.827	167.45	125.676	1	0	1	yes	2
FBgn0028982	Spt6	CG12225	FBgn0028982	1736.56	1795.83	2831.1	2801.35	1595.27	2496.43	2503.08	2483.5	1765.56	1594.98	2816.22	2493.29	2045.85	1766.2	1680.27	1	0	1	NA	2
FBgn0014026	RpL7A	CG3314	FBgn0014026	54695.3	58014.9	81227.9	94046.2	45542.6	58080.2	40744.2	39228	43403.3	40454.7	87637.1	39986.1	51811.4	56355.1	41929	1	1	0	NA	2
FBgn0264270	Sxl	CG43770	FBgn0264270	515.842	519.514	392.821	621.137	795.751	1042.1	803.824	953.546	648.422	541.2	506.979	878.685	918.924	517.678	594.811	1	1	1	yes	3
FBgn0029941	CG1677	CG1677	FBgn0029941	1438.06	1387.94	2108.22	2250.51	2179.83	2749.01	2245.57	2036.77	1487.06	1665.23	2179.36	2141.17	2464.42	1413	1576.15	1	1	1	yes	3
FBgn0027553	NELF-B	CG32721	FBgn0027553	253.115	212.018	218.492	190.435	154.625	165.211	174.842	170.127	175.505	163.921	204.463	172.484	159.918	232.566	169.713	1	0	1	NA	2
FBgn0029979	mahe	CG10777	FBgn0029979	499.822	560.232	590.393	667.411	837.235	1026.21	1368.57	1225.99	1018.35	853.431	628.902	1297.28	931.723	530.027	935.89	1	1	1	NA	3
FBgn0029992	Upf2	CG2253	FBgn0029992	561.766	659.923	671.747	493.884	610.955	429.706	594.908	544.884	734.598	525.589	582.816	569.896	520.331	610.844	630.093	1	1	1	NA	3
FBgn0030007	alpha-PheRS	CG2263	FBgn0030007	518.512	573.571	505.553	554.396	343.191	486.1	624.514	529.417	445.593	629.666	529.975	576.966	414.646	546.042	537.629	1	1	1	NA	3
FBgn0027330	l(1)G0020	CG1994	FBgn0027330	308.117	293.455	225.465	215.351	86.7406	123.908	205.565	183.809	237.509	236.775	220.408	194.687	105.324	300.786	237.142	1	1	0	NA	2
FBgn0052708	CG32708	CG32708	FBgn0052708	200.249	200.785	110.408	127.253	101.826	183.479	168.138	179.645	87.2269	65.0481	118.831	173.892	142.652	200.517	76.1375	1	0	1	NA	2
FBgn0260771	Larp7	CG42569	FBgn0260771	198.113	195.871	197.573	150.39	267.764	214.456	198.303	191.542	167.097	161.319	173.981	194.922	241.11	196.992	164.208	1	1	1	NA	3
FBgn0040235	c12.1	CG12135	FBgn0040235	276.611	287.839	268.466	244.717	380.904	517.871	483.188	457.44	302.667	270.6	256.592	470.314	449.388	282.225	286.634	1	0	1	yes	2
FBgn0027084	LysRS	CG12141	FBgn0027084	2095.41	2309.03	1867.64	1799.34	980.546	1558.38	1325.56	1327.71	1481.81	2032.1	1833.49	1326.63	1269.46	2202.22	1756.96	1	1	0	NA	2
FBgn0285926	Imp	CG1691	FBgn0285926	1419.9	1377.41	419.551	891.661	1682.01	1320.1	1169.15	1183.16	852.302	1235.91	655.606	1176.15	1501.05	1398.66	1044.11	1	1	1	NA	3
FBgn0003321	sbr	CG1664	FBgn0003321	609.292	532.853	457.904	488.545	509.13	758.539	670.878	627.568	517.056	572.424	473.224	649.223	633.834	571.072	544.74	1	1	1	NA	3
FBgn0030246	CG1582	CG1582	FBgn0030246	1171.59	1105.02	871.644	824.92	927.747	702.939	788.742	759.03	740.903	746.752	848.282	773.886	815.343	1138.31	743.828	1	1	1	NA	3
FBgn0030251	CG2145	CG2145	FBgn0030251	639.195	718.895	769.371	557.066	4838.62	3558.38	2048.94	2059.37	1296.84	1673.04	663.218	2054.16	4198.5	679.045	1484.94	1	0	1	NA	2
FBgn0010391	SrpRalpha	CG2522	FBgn0010391	1955.5	1936.24	2225.6	2108.13	1304.88	1483.72	2443.31	2311	1186.5	1550.75	2166.86	2377.15	1394.3	1945.87	1368.62	1	0	1	NA	2
FBgn0003277	RpII215	CG1554	FBgn0003277	1510.15	1412.52	928.591	801.783	452.56	447.975	1106.59	1055.86	924.815	863.839	865.187	1081.22	450.267	1461.33	894.327	1	1	0	NA	2
FBgn0030354	Upf1	CG1559	FBgn0030354	1108.58	1027.79	909.996	1064.3	678.839	451.152	964.701	943.434	862.811	887.256	987.147	954.067	564.996	1068.19	875.034	1	1	1	NA	3
FBgn0011837	Tis11	CG4070	FBgn0011837	786.045	681.686	805.399	1008.24	916.433	625.099	1922.7	1973.72	1131.85	1561.16	906.817	1948.21	770.766	733.866	1346.5	1	1	1	NA	3
FBgn0086675	fne	CG4396	FBgn0086675	255.785	311.708	234.763	246.497	693.925	1254.17	680.933	900.604	427.727	265.396	240.63	790.769	974.047	283.747	346.562	1	1	1	NA	3
FBgn0030479	Rbp1-like	CG1987	FBgn0030479	652.545	911.957	998.323	1085.66	2477.76	2711.68	1421.08	1507.95	1383.02	1204.69	1041.99	1464.51	2594.72	782.251	1293.86	1	1	1	yes	3
FBgn0026713	l(1)G0007	CG32604	FBgn0026713	632.253	530.746	1107.57	1096.33	1116.31	946.783	1178.09	1180.78	1055.13	978.324	1101.95	1179.43	1031.55	581.5	1016.73	1	1	1	yes	3
FBgn0030554	CG1434	CG1434	FBgn0030554	262.193	246.418	382.361	249.167	260.222	279.587	310.023	318.84	209.134	223.766	315.764	314.431	269.904	254.305	216.45	1	0	1	NA	2
FBgn0030571	CG14414	CG14414	FBgn0030571	197.579	245.014	174.329	174.417	346.962	324.067	196.627	199.275	280.597	278.406	174.373	197.951	335.515	221.297	279.502	1	0	1	NA	2
FBgn0030616	RpL37a	CG9091	FBgn0030616	25940	28833	51432.8	57611.8	29095.8	40410.7	21691.5	20346.3	22016.9	25254.3	54522.3	21018.9	34753.2	27386.5	23635.6	1	1	1	NA	3
FBgn0026428	HDAC6	CG6170	FBgn0026428	890.174	787.695	1020.4	913.018	1478.36	1362.19	5917.8	5690.94	1117.14	1376.42	966.711	5804.37	1420.28	838.935	1246.78	1	1	0	NA	2
FBgn0030631	CG6227	CG6227	FBgn0030631	295.835	314.516	339.36	300.78	199.88	173.153	300.526	270.062	281.648	309.629	320.07	285.294	186.517	305.176	295.639	1	0	1	yes	2
FBgn0027093	ArgRS	CG9020	FBgn0027093	633.321	728.021	298.683	413.795	358.276	235.902	277.624	276.011	418.269	320.037	356.239	276.817	297.089	680.671	369.153	1	1	0	NA	2
FBgn0030719	eIF5	CG9177	FBgn0030719	37.9138	57.5677	84.84	39.1548	395.99	138.205	78.2039	63.6491	90.3797	124.892	61.9974	70.9265	267.097	47.7408	107.636	1	0	1	NA	2
FBgn0285954	caz	CG3606	FBgn0285954	1326.98	1611.19	1646.83	1239.6	2428.74	1821.29	1375.27	1275.96	2052.46	1706.86	1443.22	1325.61	2125.01	1469.09	1879.66	1	1	1	NA	3
FBgn0278608	Dsp1	CG12223	FBgn0278608	547.882	506.877	720.559	777.756	863.634	919.778	1546.2	1343.17	940.579	603.647	749.158	1444.69	891.706	527.379	772.113	1	1	0	NA	2
FBgn0005411	U2af50	CG9998	FBgn0005411	804.201	774.356	546.23	646.944	580.785	627.482	830.079	873.241	480.273	588.035	596.587	851.66	604.134	789.278	534.154	1	1	1	yes	3
FBgn0004227	nonA	CG4211	FBgn0004227	1012.99	921.084	1285.38	1599.12	1142.71	855.441	1573.57	1439.54	1080.35	949.703	1442.25	1506.56	999.077	967.039	1015.03	1	1	1	yes	3
FBgn0010416	TH1	CG9984	FBgn0010416	264.329	230.973	296.359	369.301	256.45	164.416	364.207	394.386	228.051	234.173	332.83	379.296	210.433	247.651	231.112	1	0	1	NA	2
FBgn0261609	eIF2alpha	CG9946	FBgn0261609	3308.65	3242.75	4264.08	4404.02	2598.45	3478.16	2086.93	2005.84	2435	2336.53	4334.05	2046.38	3038.3	3275.7	2385.76	1	1	1	NA	3
FBgn0262734	eIF4H1	CG4429	FBgn0262734	3690.99	4318.98	3022.86	4877.44	2602.22	4597.3	3900.14	4660.66	2801.77	2682.58	3950.15	4280.4	3599.76	4004.99	2742.18	1	1	1	NA	3
FBgn0061200	Nup153	CG4453	FBgn0061200	937.7	1049.56	1362.09	1129.26	863.634	777.601	1273.61	1314.62	1822.31	1321.78	1245.67	1294.11	820.618	993.629	1572.04	1	0	1	NA	2
FBgn0010412	RpS19a	CG4464	FBgn0010412	25023.1	27956.9	41229.9	41863.6	20599	26405.9	16544.6	18624.2	21503	23932.5	41546.7	17584.4	23502.4	26490	22717.8	1	1	0	NA	2
FBgn0261791	SNRPG	CG9742	FBgn0261791	500.89	577.783	584.582	856.066	603.413	903.892	542.4	588.308	387.792	382.483	720.324	565.354	753.652	539.337	385.137	1	0	1	yes	2
FBgn0030787	CG9609	CG9609	FBgn0030787	55.0018	70.2045	130.165	77.4197	86.7406	121.525	156.408	122.539	60.9537	54.6404	103.793	139.474	104.133	62.6032	57.7971	1	0	1	NA	2
FBgn0002590	RpS5a	CG8922	FBgn0002590	38872.4	40120.5	61985.5	62095	43034.6	28899.9	22846.7	25421	28453.8	29349.7	62040.3	24133.8	35967.3	39496.4	28901.8	1	1	1	NA	3
FBgn0286809	xmas	CG46386	FBgn0286809	200.783	127.07	119.706	156.619	56.5699	57.1883	142.443	148.713	285.852	114.485	138.162	145.578	56.8791	163.927	200.168	1	0	1	NA	2
FBgn0027602	CG8611	CG8611	FBgn0027602	116.412	143.217	166.193	148.61	113.14	155.679	153.615	113.022	122.958	179.533	157.402	133.318	134.41	129.814	151.246	1	0	1	NA	2
FBgn0030855	CG5800	CG5800	FBgn0030855	452.296	427.546	275.439	263.405	135.768	324.067	262.542	227.828	300.565	252.387	269.422	245.185	229.917	439.921	276.476	1	0	1	NA	2
FBgn0027087	HisRS	CG6335	FBgn0027087	1211.11	1019.37	1428.33	1795.78	980.546	1232.72	1370.24	1349.72	1165.48	1732.88	1612.06	1359.98	1106.64	1115.24	1449.18	1	1	0	NA	2
FBgn0030956	CG18259	CG18259	FBgn0030956	208.259	165.683	119.706	157.509	165.939	188.245	168.138	165.963	91.4306	124.892	138.607	167.051	177.092	186.971	108.162	1	0	1	NA	2
FBgn0030959	CG6961	CG6961	FBgn0030959	202.919	188.148	134.814	162.848	116.911	143.765	167.58	189.757	76.7176	145.708	148.831	178.669	130.338	195.534	111.213	1	0	1	NA	2
FBgn0052533	CG32533	CG32533	FBgn0052533	194.909	179.724	280.088	236.708	211.194	254.17	284.886	265.898	169.199	249.785	258.398	275.392	232.682	187.316	209.492	1	0	1	NA	2
FBgn0020261	pcm	CG3291	FBgn0020261	1006.59	989.182	711.261	498.334	558.157	405.878	602.17	557.97	862.811	655.685	604.797	580.07	482.017	997.884	759.248	1	1	0	NA	2
FBgn0285947	RpS10b	CG14206	FBgn0285947	29824.8	31740.2	62321.4	50912.8	36242.5	38057.2	19887.3	20037	29293.5	32422.6	56617.1	19962.1	37149.8	30782.5	30858.1	1	1	0	NA	2
FBgn0031062	CG14230	CG14230	FBgn0031062	216.269	226.761	204.546	218.021	199.88	257.347	241.874	211.767	211.236	171.727	211.283	226.82	228.614	221.515	191.482	1	0	1	NA	2
FBgn0027334	l(1)G0004	CG11738	FBgn0027334	426.13	474.583	490.445	528.59	622.269	778.396	436.825	393.197	254.324	392.891	509.517	415.011	700.333	450.357	323.607	1	0	1	NA	2
FBgn0015527	peng	CG1685	FBgn0015527	865.611	839.646	801.912	812.462	720.324	729.15	671.995	656.716	686.255	689.51	807.187	664.355	724.737	852.628	687.883	1	1	1	NA	3
FBgn0001565	Hlc	CG1666	FBgn0001565	1940.01	1809.17	1329.55	1009.13	2496.62	3205.72	1699.82	1612.64	1796.03	1501.31	1169.34	1656.23	2851.17	1874.59	1648.67	1	0	1	NA	2
FBgn0024807	DIP1	CG17686	FBgn0024807	1595.05	1882.18	3710.88	2820.03	2172.29	1795.87	2566.76	2560.83	1745.59	1298.36	3265.46	2563.8	1984.08	1738.62	1521.97	1	1	1	NA	3
FBgn0003559	su(f)	CG17170	FBgn0003559	379.672	458.436	403.281	282.982	550.614	553.614	344.656	352.747	440.338	418.91	343.131	348.701	552.114	419.054	429.624	1	0	1	NA	2
FBgn0031224	CG11454	CG11454	FBgn0031224	555.892	523.024	615.962	490.325	690.153	1124.7	306.671	260.545	256.426	335.648	553.143	283.608	907.428	539.458	296.037	1	0	1	NA	2
FBgn0016977	spen	CG18497	FBgn0016977	1693.31	1854.8	2743.93	3499.9	8692.91	7001.59	4269.37	3876.05	5477.43	6067.69	3121.92	4072.71	7847.25	1774.06	5772.56	1	0	1	yes	2
FBgn0266557	kis	CG3696	FBgn0266557	2331.97	2106.84	3332	3563.98	2745.53	2536.93	4455.95	4323.97	3794.9	3114.5	3447.99	4389.96	2641.23	2219.4	3454.7	1	1	0	NA	2
FBgn0017457	U2af38	CG3582	FBgn0017457	360.983	492.134	328.9	323.917	659.983	320.095	358.062	357.505	399.352	369.473	326.409	357.784	490.039	426.558	384.413	1	0	1	yes	2
FBgn0086130	Dbp21E2	CG3561	FBgn0086130	307.583	375.594	468.363	415.575	165.939	220.016	249.694	248.053	221.746	202.95	441.969	248.873	192.977	341.589	212.348	1	1	1	NA	3
FBgn0020305	dbe	CG4258	FBgn0020305	267.533	334.174	270.791	218.911	199.88	308.975	302.202	268.873	167.097	184.737	244.851	285.537	254.428	300.853	175.917	1	0	1	NA	2
FBgn0261938	mtRNApol	CG4644	FBgn0261938	784.977	1773.37	2354.6	1632.04	546.843	569.5	750.757	811.377	918.51	926.285	1993.32	781.067	558.171	1279.17	922.398	1	1	0	NA	2
FBgn0031318	CG4887	CG4887	FBgn0031318	578.32	622.012	880.941	725.253	626.041	845.115	666.409	672.182	556.991	762.364	803.097	669.295	735.578	600.166	659.678	1	0	1	yes	2
FBgn0031319	CG4896	CG4896	FBgn0031319	404.236	388.933	521.824	541.048	392.218	475.775	526.759	500.27	315.278	351.26	531.436	513.514	433.996	396.585	333.269	1	0	1	yes	2
FBgn0260648	Rrp40	CG31938	FBgn0260648	146.315	153.748	102.273	150.39	154.625	88.1652	145.794	135.626	114.551	135.3	126.331	140.71	121.395	150.032	124.926	1	0	1	NA	2
FBgn0031390	tho2	CG31671	FBgn0031390	537.736	463.35	638.043	553.506	558.157	559.174	664.733	711.442	564.348	634.87	595.775	688.088	558.665	500.543	599.609	1	1	0	NA	2
FBgn0031401	papi	CG7082	FBgn0031401	2061.23	1780.39	1374.87	1039.38	2553.19	2623.51	2669.55	2807.1	1719.32	1498.71	1207.13	2738.32	2588.35	1920.81	1609.01	1	0	1	NA	2
FBgn0015521	RpS21	CG2986	FBgn0015521	17101.8	20165.6	44939.6	36742.3	21240.1	26815.7	12954.5	12375.9	12323.2	15752.1	40841	12665.2	24027.9	18633.7	14037.6	1	1	0	NA	2
FBgn0010263	Rbp9	CG3151	FBgn0010263	8377.36	12933.8	13984.7	12008.1	10503.2	9585.39	15645.8	15553.6	20048.5	6294.06	12996.4	15599.7	10044.3	10655.6	13171.3	1	1	1	NA	3
FBgn0031492	Prp40	CG3542	FBgn0031492	271.271	325.749	333.549	204.673	154.625	150.913	261.424	264.114	365.722	343.454	269.111	262.769	152.769	298.51	354.588	1	1	0	yes	2
FBgn0031497	SerRS	CG17259	FBgn0031497	1424.71	1133.1	2048.94	1834.05	856.092	987.292	1349.02	1224.8	1101.37	1680.84	1941.49	1286.91	921.692	1278.9	1391.11	1	1	0	NA	2
FBgn0051957	CG31957	CG31957	FBgn0051957	184.229	165.683	66.2449	150.39	154.625	212.073	102.782	94.5813	146.079	83.2616	108.317	98.6818	183.349	174.956	114.67	1	0	1	NA	2
FBgn0031607	Secp43	CG15440	FBgn0031607	412.78	394.55	423.038	456.509	463.874	590.945	293.265	292.072	273.241	286.212	439.773	292.668	527.409	403.665	279.726	1	0	1	yes	2
FBgn0031637	mxt	CG2950	FBgn0031637	9674.44	8034.91	3226.24	3863.87	10461.7	10838	5225.14	5105.01	3979.86	4444.09	3545.05	5165.07	10649.8	8854.67	4211.97	1	0	1	NA	2
FBgn0015834	eIF3i	CG8882	FBgn0015834	4057.85	3930.75	3649.28	3366.42	2334.45	2618.75	2707.53	2641.73	3215.84	2791.87	3507.85	2674.63	2476.6	3994.3	3003.85	1	1	1	NA	3
FBgn0022023	eIF3h	CG9124	FBgn0022023	6269.67	5555.99	6224.7	5211.15	3846.76	4276.41	4370.48	4252	4572.58	4673.06	5717.92	4311.24	4061.58	5912.83	4622.82	1	1	1	NA	3
FBgn0014189	Hel25E	CG7269	FBgn0014189	1313.63	1338.8	685.693	847.167	1142.71	936.458	696.015	757.245	899.593	1056.38	766.43	726.63	1039.59	1326.22	977.987	1	1	1	yes	3
FBgn0001942	eIF4A	CG9075	FBgn0001942	39798.3	36227	48543.6	49938.4	27183.7	25596.5	36725.7	36523.9	21846.7	27286.4	49241	36624.8	26390.1	38012.6	24566.5	1	1	1	yes	3
FBgn0031764	CG9107	CG9107	FBgn0031764	197.579	213.422	183.626	155.729	154.625	197.776	172.049	168.343	160.792	140.504	169.678	170.196	176.2	205.501	150.648	1	0	1	NA	2
FBgn0031782	WDR79	CG9226	FBgn0031782	142.043	128.474	86.0022	64.0715	64.1126	209.69	129.036	121.944	120.857	91.0674	75.0368	125.49	136.901	135.259	105.962	1	0	1	NA	2
FBgn0031868	Rat1	CG10354	FBgn0031868	262.193	277.308	317.278	306.119	169.71	173.948	277.624	289.692	259.579	309.629	311.699	283.658	171.829	269.75	284.604	1	1	0	NA	2
FBgn0028554	x16	CG10203	FBgn0028554	185.297	252.736	181.302	162.848	343.191	350.278	333.484	267.683	397.25	320.037	172.075	300.583	346.735	219.017	358.644	1	1	1	yes	3
FBgn0026196	nop5	CG10206	FBgn0026196	1143.29	1135.91	671.747	765.298	531.757	722.796	479.278	469.337	668.389	754.558	718.522	474.308	627.277	1139.6	711.474	1	1	0	NA	2
FBgn0004838	Hrb27C	CG10377	FBgn0004838	5754.36	6759.29	5479.73	7602.26	9533.92	9998.41	10009	9861.44	11184	9902.93	6541	9935.21	9766.17	6256.83	10543.4	1	1	1	yes	3
FBgn0016978	snRNP-U1-70K	CG8749	FBgn0016978	325.739	348.917	518.338	413.795	422.389	451.946	497.712	422.344	465.561	395.493	466.066	460.028	437.168	337.328	430.527	1	1	1	yes	3
FBgn0031883	Caper	CG11266	FBgn0031883	1715.74	1840.06	2010.59	1527.04	2447.59	2715.65	2158.99	2118.86	1464.99	1769.31	1768.81	2138.92	2581.62	1777.9	1617.15	1	0	1	yes	2
FBgn0263133	mEFG1	CG4567	FBgn0263133	438.946	1703.86	1293.52	1386.44	218.737	432.883	744.613	798.29	503.394	434.521	1339.98	771.451	325.81	1071.41	468.958	1	1	1	NA	3
FBgn0031951	r2d2	CG7138	FBgn0031951	119.616	123.56	131.328	173.527	147.082	141.382	210.592	237.346	201.778	156.116	152.427	223.969	144.232	121.588	178.947	1	0	1	NA	2
FBgn0020618	Rack1	CG7111	FBgn0020618	46877.5	50444.8	69838.4	78302.5	30921.1	50498	32029	30970.3	26876.4	31441.7	74070.4	31499.6	40709.6	48661.2	29159	1	1	0	yes	2
FBgn0003607	Su(var)205	CG8409	FBgn0003607	715.557	770.144	513.689	460.959	633.583	691.819	585.971	547.858	520.209	606.249	487.324	566.914	662.701	742.851	563.229	1	1	1	NA	3
FBgn0015299	Ssb-c31a	CG8396	FBgn0015299	197.045	292.753	199.897	220.691	252.679	150.119	53.0669	80.3049	205.982	197.746	210.294	66.6859	201.399	244.899	201.864	1	1	0	NA	2
FBgn0010265	RpS13	CG13389	FBgn0010265	40328.1	44761.7	68169.5	64079.5	25554.5	29816.5	23010.9	22773.3	22217.6	27510.2	66124.5	22892.1	27685.5	42544.9	24863.9	1	1	0	NA	2
FBgn0027094	AlaRS	CG13391	FBgn0027094	1296.01	1107.13	1277.25	1284.99	742.952	804.607	1821.59	1952.9	1037.26	1332.19	1281.12	1887.24	773.78	1201.57	1184.73	1	1	1	NA	3
FBgn0020497	emb	CG13387	FBgn0020497	926.486	958.994	689.18	667.411	501.587	367.752	856.333	1020.17	989.973	1183.88	678.295	938.251	434.67	942.74	1086.92	1	1	0	NA	2
FBgn0043002	Chrac-14	CG13399	FBgn0043002	68.3517	81.4373	113.895	72.0804	169.71	253.376	95.5205	96.9607	84.0741	124.892	92.9876	96.2406	211.543	74.8945	104.483	1	1	0	NA	2
FBgn0032050	CG13096	CG13096	FBgn0032050	427.732	456.33	227.79	312.348	184.795	208.102	231.819	181.43	265.884	351.26	270.069	206.624	196.448	442.031	308.572	1	0	1	NA	2
FBgn0286786	hoip	CG3949	FBgn0286786	407.44	413.505	288.224	357.732	154.625	281.97	158.084	174.886	264.834	273.202	322.978	166.485	218.297	410.473	269.018	1	1	1	yes	3
FBgn0004867	RpS2	CG5920	FBgn0004867	35286	42624.7	53415.5	67951.3	17302.9	27204.9	20197.3	20674.6	17144.8	23732.2	60683.4	20436	22253.9	38955.4	20438.5	1	1	1	NA	3
FBgn0032156	CG13124	CG13124	FBgn0032156	18740.7	15275.1	8830.33	10017.4	39553.7	43150.1	12800.9	12723.3	10877.1	10876	9423.86	12762.1	41351.9	17007.9	10876.6	1	0	1	NA	2
FBgn0024285	Srp54	CG4602	FBgn0024285	795.657	676.07	879.779	915.688	731.638	1324.86	1171.38	1079.65	934.274	814.403	897.734	1125.52	1028.25	735.863	874.338	1	1	1	yes	3
FBgn0032169	CG4709	CG4709	FBgn0032169	164.471	165.683	122.03	121.914	131.997	180.302	199.979	167.153	111.398	137.902	121.972	183.566	156.149	165.077	124.65	1	0	1	NA	2
FBgn0005593	RpL7	CG4897	FBgn0005593	46146.5	49077.9	75199.6	76401.7	31139.9	34673.6	33509.8	31794.2	35756.7	38034.9	75800.6	32652	32906.7	47612.2	36895.8	1	1	1	NA	3
FBgn0032198	eEF1delta	CG4912	FBgn0032198	5826.45	6222.23	8444.48	10000.5	5411.86	6450.36	2207.58	2365.13	2666.2	2906.35	9222.49	2286.36	5931.11	6024.34	2786.28	1	0	1	NA	2
FBgn0004419	me31B	CG4916	FBgn0004419	561.232	629.033	448.606	361.292	437.474	331.215	393.254	406.878	653.676	517.783	404.949	400.066	384.345	595.132	585.73	1	1	1	NA	3
FBgn0011305	Rsf1	CG5655	FBgn0011305	369.527	457.032	436.984	395.107	935.29	1179.51	527.318	600.205	385.69	296.619	416.046	563.761	1057.4	413.279	341.155	1	1	1	yes	3
FBgn0032236	mRpS7	CG5108	FBgn0032236	1227.13	1895.52	3702.74	3679.66	1451.96	2363.78	933.419	1021.36	1026.76	837.82	3691.2	977.389	1907.87	1561.32	932.288	1	1	1	NA	3
FBgn0262601	SmB	CG5352	FBgn0262601	161.801	143.919	126.679	152.17	222.508	215.25	105.017	98.1504	159.741	221.164	139.424	101.584	218.879	152.86	190.452	1	0	1	yes	2
FBgn0051719	RluA-1	CG31719	FBgn0051719	214.667	185.34	232.438	309.679	4518.05	4547.26	2005.93	2111.13	2468.63	1386.83	271.059	2058.53	4532.66	200.004	1927.73	1	0	1	NA	2
FBgn0032261	CG6094	CG6094	FBgn0032261	419.188	1151.35	1186.6	1506.57	471.416	726.767	385.434	413.421	544.38	291.416	1346.58	399.428	599.092	785.271	417.898	1	1	0	NA	2
FBgn0015756	RpL9	CG6141	FBgn0015756	30544.7	31892.5	51024.9	47950.4	28511.3	24056.4	17406.5	17179.9	23155.1	25907.4	49487.6	17293.2	26283.8	31218.6	24531.2	1	0	1	NA	2
FBgn0021761	Nup154	CG4579	FBgn0021761	168.743	224.655	141.787	135.262	101.826	82.6053	125.126	140.385	317.38	234.173	138.525	132.756	92.2156	196.699	275.777	1	1	0	NA	2
FBgn0283682	Ge-1	CG6181	FBgn0283682	601.816	593.228	590.393	454.729	433.703	362.192	594.35	641.249	592.723	736.345	522.561	617.8	397.948	597.522	664.534	1	1	0	NA	2
FBgn0032408	CG6712	CG6712	FBgn0032408	347.099	395.954	288.224	247.387	135.768	243.05	251.37	225.449	251.171	215.96	267.805	238.409	189.409	371.526	233.566	1	0	1	NA	2
FBgn0027081	ThrRS	CG5353	FBgn0027081	2441.44	2279.54	2729.99	2677.65	935.29	1239.08	1376.95	1317.6	1191.75	1831.76	2703.82	1347.27	1087.18	2360.49	1511.75	1	1	0	NA	2
FBgn0000114	bru1	CG31762	FBgn0000114	2590.96	2620.03	9112.75	11166.2	1402.93	2806.99	170.931	158.23	1730.88	1764.11	10139.5	164.581	2104.96	2605.5	1747.49	1	1	1	yes	3
FBgn0262475	bru2	CG43065	FBgn0262475	770.025	701.343	1960.62	1947.06	275.307	497.22	441.293	478.855	613.741	908.072	1953.84	460.074	386.264	735.684	760.907	1	0	1	NA	2
FBgn0032430	CG6388	CG6388	FBgn0032430	473.656	460.542	285.899	225.14	256.45	315.33	296.616	330.142	335.246	369.473	255.52	313.379	285.89	467.099	352.359	1	0	1	NA	2
FBgn0265298	SC35	CG5442	FBgn0265298	357.779	432.46	536.933	401.337	411.075	481.335	329.574	357.505	718.834	452.735	469.135	343.54	446.205	395.119	585.784	1	1	1	yes	3
FBgn0020443	eRF3	CG6382	FBgn0020443	1553.93	1652.62	1671.23	1446.95	614.727	564.734	1460.74	1383.62	1481.81	1553.35	1559.09	1422.18	589.73	1603.27	1517.58	1	0	1	NA	2
FBgn0032486	mRF1	CG5705	FBgn0032486	198.113	606.567	615.962	367.521	297.935	216.839	159.759	171.912	480.273	247.183	491.741	165.836	257.387	402.34	363.728	1	0	1	NA	2
FBgn0032515	loqs	CG6866	FBgn0032515	404.77	384.721	541.581	429.813	626.041	835.584	785.949	868.482	597.977	416.308	485.697	827.216	730.812	394.746	507.143	1	0	1	NA	2
FBgn0032518	RpL24	CG9282	FBgn0032518	24760.4	28163.3	62759.5	46759.7	32987.8	39849.9	20582.7	18758	25776.1	26740	54759.6	19670.4	36418.9	26461.8	26258	1	1	0	NA	2
FBgn0028658	Adat1	CG16889	FBgn0028658	32.0399	41.4207	67.4071	24.0268	184.795	62.7482	29.6058	26.7683	148.181	228.969	45.717	28.187	123.772	36.7303	188.575	1	0	1	NA	2
FBgn0019890	Smg5	CG8954	FBgn0019890	5613.92	3971.47	2580.07	3299.68	3952.35	4038.13	2409.8	2349.66	1928.45	2071.13	2939.87	2379.73	3995.24	4792.7	1999.79	1	1	0	NA	2
FBgn0286027	Rnmt	CG3688	FBgn0286027	213.599	247.12	144.112	136.152	181.024	196.188	167.58	159.42	136.62	153.514	140.132	163.5	188.606	230.36	145.067	1	0	1	NA	2
FBgn0024183	vig	CG4170	FBgn0024183	1874.87	5154.42	4433.76	4056.08	2983.12	2325.66	3053.86	3133.08	3296.76	2307.91	4244.92	3093.47	2654.39	3514.64	2802.33	1	1	1	NA	3
FBgn0001978	stc	CG3647	FBgn0001978	1292.27	1148.55	1208.68	910.349	1538.7	847.498	1013.86	973.176	1235.89	1303.56	1059.51	993.517	1193.1	1220.41	1269.73	1	1	1	NA	3
FBgn0001986	Mtr4	CG4152	FBgn0001986	395.158	409.293	294.035	299.89	120.683	169.976	326.781	340.255	270.088	296.619	296.962	333.518	145.329	402.225	283.354	1	0	1	yes	2
FBgn0261068	LSm7	CG13277	FBgn0261068	140.975	186.042	191.762	189.545	162.167	196.982	203.33	165.963	175.505	132.698	190.653	184.647	179.574	163.509	154.101	1	0	1	yes	2
FBgn0051739	AspRS-m	CG31739	FBgn0051739	405.838	463.35	431.173	297.22	218.737	152.502	247.46	284.339	578.01	444.929	364.197	265.899	185.62	434.594	511.469	1	1	0	NA	2
FBgn0000183	BicD	CG6605	FBgn0000183	1695.98	1427.26	1173.81	1159.52	1071.06	1086.58	1528.89	1629.3	1208.57	1259.33	1166.66	1579.09	1078.82	1561.62	1233.95	1	1	1	NA	3
FBgn0286781	cass	CG6582	FBgn0286781	1019.94	1015.86	950.673	811.572	1527.39	2390.79	1106.59	1129.03	1086.66	897.664	881.122	1117.81	1959.09	1017.9	992.161	1	1	0	NA	2
FBgn0032646	mEFTs	CG6412	FBgn0032646	1037.56	2065.42	2612.61	3088.78	859.863	1360.6	1142.89	1203.98	1280.03	705.122	2850.69	1173.44	1110.23	1551.49	992.575	1	0	1	NA	2
FBgn0261597	RpS26	CG10305	FBgn0261597	39375.9	44305.4	92489.5	86154.8	48257.9	67963.5	34868.9	32540.1	31197.8	37446.9	89322.2	33704.5	58110.7	41840.7	34322.4	1	1	0	NA	2
FBgn0086707	ncm	CG12750	FBgn0086707	535.6	504.069	561.339	573.974	667.525	590.151	688.194	709.062	882.778	824.81	567.656	698.628	628.838	519.834	853.794	1	0	1	yes	2
FBgn0284256	bsf	CG10302	FBgn0284256	1482.38	3672.4	2749.75	2107.24	931.518	893.567	1343.43	1473.45	2190.13	1948.84	2428.49	1408.44	912.543	2577.39	2069.49	1	0	1	NA	2
FBgn0032690	CG10333	CG10333	FBgn0032690	491.812	506.175	454.417	473.417	516.672	651.311	492.126	508.003	487.63	437.123	463.917	500.064	583.991	498.993	462.377	1	0	1	yes	2
FBgn0032701	CG10341	CG10341	FBgn0032701	162.335	195.871	155.734	192.214	135.768	150.119	150.822	143.954	211.236	189.941	173.974	147.388	142.944	179.103	200.588	1	0	1	NA	2
FBgn0032720	mRpL13	CG10603	FBgn0032720	343.895	1350.74	1310.95	1009.13	577.013	656.076	437.942	515.736	580.112	517.783	1160.04	476.839	616.545	847.315	548.947	1	1	0	NA	2
FBgn0086710	RpL30	CG10652	FBgn0086710	25642	29275.3	53415.5	54955.5	24902.1	30306.6	19982.8	18432.6	15459.1	18315	54185.5	19207.7	27604.3	27458.7	16887	1	1	0	NA	2
FBgn0263198	Acn	CG10473	FBgn0263198	859.203	1184.35	1472.5	945.944	1018.26	1137.41	1152.95	1115.35	1060.38	965.314	1209.22	1134.15	1077.83	1021.78	1012.85	1	0	1	yes	2
FBgn0086444	l(2)37Cb	CG10689	FBgn0086444	252.047	254.843	205.708	149.5	388.447	347.101	288.796	242.104	197.574	244.581	177.604	265.45	367.774	253.445	221.078	1	0	1	yes	2
FBgn0010300	brat	CG10719	FBgn0010300	368.459	221.846	248.709	458.289	1293.57	642.574	1359.07	1315.81	348.908	608.85	353.499	1337.44	968.07	295.152	478.879	1	1	1	NA	3
FBgn0003346	RanGAP	CG9999	FBgn0003346	252.047	296.965	139.463	167.298	116.911	136.616	146.353	144.549	287.954	197.746	153.38	145.451	126.764	274.506	242.85	1	1	0	NA	2
FBgn0284220	Top2	CG10223	FBgn0284220	391.42	320.835	282.413	267.854	241.365	217.633	317.843	293.856	382.537	377.279	275.133	305.85	229.499	356.128	379.908	1	1	1	NA	3
FBgn0032793	CG10189	CG10189	FBgn0032793	223.745	187.446	135.976	179.756	173.481	239.873	166.463	214.146	166.046	132.698	157.866	190.304	206.677	205.596	149.372	1	0	1	NA	2
FBgn0002044	swm	CG10084	FBgn0002044	1966.18	2056.99	2753.23	3159.97	3337.63	3470.22	3097.99	3128.92	2090.29	1930.63	2956.6	3113.45	3403.92	2011.59	2010.46	1	1	1	NA	3
FBgn0032819	CG10463	CG10463	FBgn0032819	257.387	257.651	119.706	104.116	116.911	216.045	178.193	170.722	187.065	176.931	111.911	174.458	166.478	257.519	181.998	1	1	0	NA	2
FBgn0032822	CG10466	CG10466	FBgn0032822	108.402	136.899	87.1644	96.9971	82.9693	128.674	58.0943	76.7358	68.3102	65.0481	92.0807	67.4151	105.821	122.65	66.6792	1	0	1	yes	2
FBgn0011638	La	CG10922	FBgn0011638	2237.45	1915.18	1018.08	1108.79	829.693	1036.54	912.751	947.598	1022.55	1085	1063.44	930.174	933.115	2076.32	1053.78	1	1	1	NA	3
FBgn0262743	Fs(2)Ket	CG2637	FBgn0262743	660.555	703.45	748.451	1077.65	727.867	633.042	833.989	848.852	876.473	746.752	913.049	841.421	680.454	682.002	811.613	1	1	0	NA	2
FBgn0032883	Rhau	CG9323	FBgn0032883	382.876	311.006	299.845	312.348	120.683	162.828	306.112	346.203	346.806	221.164	306.097	326.158	141.755	346.941	283.985	1	1	1	NA	3
FBgn0032919	CG9253	CG9253	FBgn0032919	941.972	969.525	590.393	683.429	535.529	593.328	582.061	586.523	760.871	777.976	636.911	584.292	564.429	955.749	769.423	1	0	1	NA	2
FBgn0032924	Nbr	CG9247	FBgn0032924	295.835	285.03	241.736	206.453	248.908	185.862	277.624	280.175	238.56	226.367	224.094	278.899	217.385	290.433	232.464	1	1	0	NA	2
FBgn0000559	eEF2	CG2238	FBgn0000559	123651	115329	124886	128181	78341.8	53274	69758.4	74923.3	69531.4	87271.2	126533	72340.9	65807.9	119490	78401.3	1	1	1	NA	3
FBgn0064225	RpL5	CG17489	FBgn0064225	19715.7	21469.3	18360.3	23209	18973.6	11479	14748.1	14520.3	24914.3	20352.3	20784.7	14634.2	15226.3	20592.5	22633.3	1	1	1	NA	3
FBgn0086683	Spf45	CG17540	FBgn0086683	217.871	202.891	155.734	221.58	226.28	226.37	248.577	280.77	213.338	252.387	188.657	264.673	226.325	210.381	232.862	1	0	1	yes	2
FBgn0004607	zfh2	CG1449	FBgn0004607	51.2638	47.037	72.0559	118.354	94.2832	50.834	177.076	125.514	196.523	93.6693	95.2051	151.295	72.5586	49.1504	145.096	1	0	1	NA	2
FBgn0022361	Pur-alpha	CG1507	FBgn0022361	215.735	196.573	117.381	335.485	1316.19	873.71	667.526	790.557	339.449	348.658	226.433	729.042	1094.95	206.154	344.054	1	1	0	NA	2
FBgn0051992	gw	CG31992	FBgn0051992	2042.54	2417.14	4296.62	3858.53	2862.44	3764.89	2620.39	2785.09	3491.18	2310.51	4077.57	2702.74	3313.67	2229.84	2900.84	1	0	1	NA	2
FBgn0023213	eIF4G1	CG10811	FBgn0023213	1940.55	2834.86	2366.22	2463.19	5012.1	4092.93	2396.39	3018.27	4002.98	2846.51	2414.71	2707.33	4552.51	2387.7	3424.74	1	1	1	NA	3
FBgn0052016	4E-T	CG32016	FBgn0052016	99.8576	114.433	148.761	176.197	94.2832	122.319	199.979	195.706	174.454	122.29	162.479	197.842	108.301	107.146	148.372	1	1	0	NA	2
FBgn0263594	lost	CG14648	FBgn0263594	13126.2	11435.6	2912.45	2426.71	6026.58	3883.24	4484.44	4765.95	4593.6	6156.15	2669.58	4625.19	4954.91	12280.9	5374.88	0	1	1	yes	2
FBgn0024957	Irp-1B	CG6342	FBgn0024957	1446.6	1489.74	1975.73	2038.72	984.317	1114.38	2029.39	2117.07	1295.79	1613.19	2007.22	2073.23	1049.35	1468.17	1454.49	0	1	1	NA	2
FBgn0261618	larp	CG42551	FBgn0261618	2445.18	3392.99	4739.42	4753.75	5317.57	5509.93	5164.25	5162.12	5084.38	4503.93	4746.58	5163.18	5413.75	2919.08	4794.16	0	1	1	NA	2
FBgn0026372	RpL23A	CG7977	FBgn0026372	36908.3	41677.6	80098.3	70990.3	35446.7	44535.4	36063.7	30371.3	33998.5	33523.2	75544.3	33217.5	39991	39293	33760.9	0	1	1	NA	2
FBgn0035424	Larp4B	CG11505	FBgn0035424	2427.55	2360.28	2652.12	3284.55	5151.64	4748.21	3629.78	3633.35	4398.13	4022.58	2968.34	3631.56	4949.93	2393.92	4210.35	0	1	1	NA	2
FBgn0036340	Srrm1	CG11274	FBgn0036340	358.847	417.015	506.716	348.834	331.877	274.027	587.646	509.192	572.755	442.327	427.775	548.419	302.952	387.931	507.541	0	1	1	yes	2
FBgn0036892	Lon	CG8798	FBgn0036892	676.575	1085.36	1063.41	986.879	335.648	561.557	696.573	719.175	942.681	751.956	1025.14	707.874	448.603	880.969	847.319	0	1	1	NA	2
FBgn0033699	RpS11	CG8857	FBgn0033699	46348.9	52755.2	69524.6	74830.1	34213.5	37803.8	25855.3	23644.7	34573.4	33817.2	72177.4	24750	36008.7	49552	34195.3	0	1	1	NA	2
FBgn0050122	CG30122	CG30122	FBgn0050122	1347.81	1340.2	1654.96	1287.66	1384.08	1028.59	1564.64	1578.14	1331.52	2060.72	1471.31	1571.39	1206.34	1344.01	1696.12	0	1	1	yes	2
FBgn0010278	Ssrp	CG4817	FBgn0010278	1014.06	1104.32	400.956	330.146	675.068	723.59	465.313	448.518	1191.75	967.916	365.551	456.915	699.329	1059.19	1079.83	0	1	1	NA	2
FBgn0031660	mRpL28	CG3782	FBgn0031660	6558.56	8218.14	15079.4	15552.5	8568.46	9128.68	3265.01	3409.69	3439.68	3377.3	15315.9	3337.35	8848.57	7388.35	3408.49	0	1	1	NA	2
FBgn0051716	Cnot4	CG31716	FBgn0051716	2784.8	2755.53	2811.34	3069.2	1946.01	1932.49	2604.75	2565.59	1869.6	1823.95	2940.27	2585.17	1939.25	2770.16	1846.77	0	1	1	NA	2

## Sheet: heatmap_log2FC_exons
IFMvsbru1IR	IFMvsleg	IFMvssalm	IFMvstdt	IDs	FBgn	CGnumber	Exon	GeneID
1.52458	-1.41699	-1.97281	0	FBgn0010247_CG40411_E001_Parp	FBgn0010247	CG40411	E001	Parp
-1.51133	0	0	0	FBgn0003261_CG10279_E004_Rm62	FBgn0003261	CG10279	E004	Rm62
1.75988	0	0	0	FBgn0000504_CG11094_E008_dsx	FBgn0000504	CG11094	E008	dsx
-1.6493	0	1.65429	0	FBgn0051450_CG31450_E001_mRpS18A	FBgn0051450	CG31450	E001	mRpS18A
1.17637	0	0	0	FBgn0003165_CG9755_E010_pum	FBgn0003165	CG9755	E010	pum
1.71634	0	0	-2.64137	FBgn0002431_CG9484_E001_hyd	FBgn0002431	CG9484	E001	hyd
1.22293	-1.16425	0	0	FBgn0002431_CG9484_E003_hyd	FBgn0002431	CG9484	E003	hyd
1.41047	-1.07269	0	0	FBgn0260944_CG17136_E001_Rbp1	FBgn0260944	CG17136	E001	Rbp1
1.528	0	0	0	FBgn0051368_CG31368_E009_CG31368	FBgn0051368	CG31368	E009	CG31368
0.928309	-0.899472	0	0	FBgn0263396_CG16901_E002_sqd	FBgn0263396	CG16901	E002	sqd
1.23644	0	0	0	FBgn0263396_CG16901_E012_sqd	FBgn0263396	CG16901	E012	sqd
-2.23687	1.70894	0	0	FBgn0003721_CG4898_E018_Tm1	FBgn0003721	CG4898	E018	Tm1
1.41291	0	0	0	FBgn0003721_CG4898_E027_Tm1	FBgn0003721	CG4898	E027	Tm1
1.51344	0	0	0	FBgn0003721_CG4898_E029_Tm1	FBgn0003721	CG4898	E029	Tm1
1.37704	0	0	0	FBgn0003721_CG4898_E030_Tm1	FBgn0003721	CG4898	E030	Tm1
2.60469	0	-2.63013	-3.22753	FBgn0027948_CG5000_E014_msps	FBgn0027948	CG5000	E014	msps
1.41077	0	0	0	FBgn0266917_CG16941_E001_Sf3a1	FBgn0266917	CG16941	E001	Sf3a1
1.60652	-1.5151	-2.68138	0	FBgn0022943_CG12357_E001_Cbp20	FBgn0022943	CG12357	E001	Cbp20
0.752847	-1.87889	0	0	FBgn0026250_CG8053_E002_eIF1A	FBgn0026250	CG8053	E002	eIF1A
1.48595	-1.04124	0	0	FBgn0038826_CG17838_E012_Syp	FBgn0038826	CG17838	E012	Syp
1.58277	-1.12252	0	0	FBgn0038826_CG17838_E013_Syp	FBgn0038826	CG17838	E013	Syp
1.45232	-0.767285	0	0	FBgn0038826_CG17838_E014_Syp	FBgn0038826	CG17838	E014	Syp
1.28172	0	0	0	FBgn0038826_CG17838_E020_Syp	FBgn0038826	CG17838	E020	Syp
1.09352	0	0	0	FBgn0038953_CG18596_E004_CG18596	FBgn0038953	CG18596	E004	CG18596
1.88423	-2.00231	-2.58387	0	FBgn0038989_CG6937_E001_CG6937	FBgn0038989	CG6937	E001	CG6937
3.14919	0	0	0	FBgn0024958_CG4900_E007_Irp-1A	FBgn0024958	CG4900	E007	Irp-1A
1.31778	0	0	0	FBgn0039261_CG6422_E007_Ythdf	FBgn0039261	CG6422	E007	Ythdf
1.77598	0	-2.19168	0	FBgn0039261_CG6422_E008_Ythdf	FBgn0039261	CG6422	E008	Ythdf
0.865568	-1.33708	0	0	FBgn0039300_CG10423_E003_RpS27	FBgn0039300	CG10423	E003	RpS27
1.07899	0	0	0	FBgn0003279_CG5502_E001_RpL4	FBgn0003279	CG5502	E001	RpL4
1.87232	-0.932279	0	0	FBgn0265998_CG42320_E016_Doa	FBgn0265998	CG42320	E016	Doa
2.10851	-1.40523	0	0	FBgn0265998_CG42320_E017_Doa	FBgn0265998	CG42320	E017	Doa
-0.971081	0	2.46602	0	FBgn0041588_CG31426_E001_eIF2D	FBgn0041588	CG31426	E001	eIF2D
0.739208	0	-1.95731	0	FBgn0041588_CG31426_E002_eIF2D	FBgn0041588	CG31426	E002	eIF2D
1.03782	0	0	0	FBgn0029176_CG11901_E003_eEF1gamma	FBgn0029176	CG11901	E003	eEF1gamma
0.433033	-0.725876	0	0	FBgn0029176_CG11901_E004_eEF1gamma	FBgn0029176	CG11901	E004	eEF1gamma
1.23171	0	-1.97377	0	FBgn0039726_CG7883_E005_eIF2Balpha	FBgn0039726	CG7883	E005	eIF2Balpha
0.888218	0	-1.42244	0	FBgn0002780_CG2050_E006_mod	FBgn0002780	CG2050	E006	mod
-1.47049	0	0	0	FBgn0028577_CG12085_E006_hfp	FBgn0028577	CG12085	E006	hfp
0.61142	0	0	-1.70563	FBgn0035235_CG7879_E002_CG7879	FBgn0035235	CG7879	E002	CG7879
1.06518	-1.52122	0	0	FBgn0261602_CG1263_E001_RpL8	FBgn0261602	CG1263	E001	RpL8
1.39286	-0.512583	-1.33701	0	FBgn0263106_CG10578_E002_DnaJ-1	FBgn0263106	CG10578	E002	DnaJ-1
0.965615	0	-1.42193	0	FBgn0011640_CG8597_E003_lark	FBgn0011640	CG8597	E003	lark
1.91134	0	-3.00505	0	FBgn0011640_CG8597_E006_lark	FBgn0011640	CG8597	E006	lark
-0.917084	0	0	0	FBgn0015298_CG4457_E001_Srp19	FBgn0015298	CG4457	E001	Srp19
0.897904	0	-0.774314	0	FBgn0015298_CG4457_E002_Srp19	FBgn0015298	CG4457	E002	Srp19
2.12986	0	0	0	FBgn0259935_CG42458_E004_CG42458	FBgn0259935	CG42458	E004	CG42458
-1.51965	0	0	0	FBgn0011206_CG4760_E009_bol	FBgn0011206	CG4760	E009	bol
1.18152	0	0	0	FBgn0010408_CG3395_E006_RpS9	FBgn0010408	CG3395	E006	RpS9
1.35461	0	0	0	FBgn0052062_CG32062_E011_Rbfox1	FBgn0052062	CG32062	E011	Rbfox1
1.68091	-1.47935	-3.53	0	FBgn0011284_CG11276_E002_RpS4	FBgn0011284	CG11276	E002	RpS4
0.714764	0	0	0	FBgn0264001_CG43744_E001_bru3	FBgn0264001	CG43744	E001	bru3
0.897916	-1.29469	0	0	FBgn0036450_CG13472_E002_Tdrd3	FBgn0036450	CG13472	E002	Tdrd3
1.47961	-1.12955	-2.02849	0	FBgn0087035_CG7439_E006_AGO2	FBgn0087035	CG7439	E006	AGO2
0.947749	0	0	0	FBgn0087035_CG7439_E007_AGO2	FBgn0087035	CG7439	E007	AGO2
1.13596	-1.01601	-1.22069	0	FBgn0025582_CG9677_E003_eIF3e	FBgn0025582	CG9677	E003	eIF3e
1.54542	-1.94326	0	0	FBgn0260943_CG32169_E003_Rbp6	FBgn0260943	CG32169	E003	Rbp6
-1.5847	0	2.26176	0	FBgn0260943_CG32169_E009_Rbp6	FBgn0260943	CG32169	E009	Rbp6
2.2803	0	-3.31767	0	FBgn0260943_CG32169_E023_Rbp6	FBgn0260943	CG32169	E023	Rbp6
0.768437	-0.818857	0	0	FBgn0036825_CG6846_E002_RpL26	FBgn0036825	CG6846	E002	RpL26
1.63008	-1.36206	0	0	FBgn0262519_CG8103_E001_Mi-2	FBgn0262519	CG8103	E001	Mi-2
1.39352	-0.668346	0	0	FBgn0262737_CG7437_E005_mub	FBgn0262737	CG7437	E005	mub
1.52496	0	0	0	FBgn0262737_CG7437_E007_mub	FBgn0262737	CG7437	E007	mub
-2.28825	1.68455	0	0	FBgn0262737_CG7437_E019_mub	FBgn0262737	CG7437	E019	mub
1.55002	-1.45882	-2.31468	0	FBgn0027086_CG11471_E007_IleRS	FBgn0027086	CG11471	E007	IleRS
2.48265	0	-3.30733	0	FBgn0263144_CG8276_E009_bin3	FBgn0263144	CG8276	E009	bin3
1.10415	-1.36246	-2.14167	0	FBgn0027548_CG2910_E005_nito	FBgn0027548	CG2910	E005	nito
4.35308	0	0	0	FBgn0033352_CG8232_E007_PAN2	FBgn0033352	CG8232	E007	PAN2
12.6158	0	0	0	FBgn0033352_CG8232_E008_PAN2	FBgn0033352	CG8232	E008	PAN2
2.25967	-2.01764	-2.85702	0	FBgn0033352_CG8232_E009_PAN2	FBgn0033352	CG8232	E009	PAN2
1.50739	0	0	0	FBgn0033352_CG8232_E010_PAN2	FBgn0033352	CG8232	E010	PAN2
2.22039	-1.55769	0	0	FBgn0010220_CG12759_E003_Dbp45A	FBgn0010220	CG12759	E003	Dbp45A
1.93313	0	0	0	FBgn0085436_CG34407_E006_Not1	FBgn0085436	CG34407	E006	Not1
2.08798	-1.6839	-3.20523	0	FBgn0004907_CG17870_E013_14-3-3zeta	FBgn0004907	CG17870	E013	14-3-3zeta
0.220698	-0.116827	0	0	FBgn0284245_CG8280_E006_eEF1alpha1	FBgn0284245	CG8280	E006	eEF1alpha1
2.46318	-2.21451	-2.91389	0	FBgn0033688_CG8877_E002_Prp8	FBgn0033688	CG8877	E002	Prp8
0.562509	-0.935203	-1.45662	0	FBgn0024556_CG6050_E001_mEFTu1	FBgn0024556	CG6050	E001	mEFTu1
0.878952	0	0	0	FBgn0024556_CG6050_E002_mEFTu1	FBgn0024556	CG6050	E002	mEFTu1
-1.66543	1.14513	1.87752	0	FBgn0024556_CG6050_E003_mEFTu1	FBgn0024556	CG6050	E003	mEFTu1
0.992144	-1.12357	0	0	FBgn0262739_CG6671_E003_AGO1	FBgn0262739	CG6671	E003	AGO1
1.28184	0	0	0	FBgn0086895_CG8241_E001_pea	FBgn0086895	CG8241	E001	pea
-1.03817	0	0	0	FBgn0086895_CG8241_E002_pea	FBgn0086895	CG8241	E002	pea
-0.78993	0	0	0	FBgn0033902_CG8309_E001_eIF3m	FBgn0033902	CG8309	E001	eIF3m
0.728523	0	0	0	FBgn0033902_CG8309_E002_eIF3m	FBgn0033902	CG8309	E002	eIF3m
2.26474	0	-3.13707	-2.91487	FBgn0264962_CG10228_E017_Pcf11	FBgn0264962	CG10228	E017	Pcf11
0.864703	0	0	0	FBgn0034138_CG8332_E006_RpS15	FBgn0034138	CG8332	E006	RpS15
1.66763	0	-2.42129	0	FBgn0034181_CG8963_E001_CG8963	FBgn0034181	CG8963	E001	CG8963
1.5514	0	0	0	FBgn0022987_CG4816_E013_qkr54B	FBgn0022987	CG4816	E013	qkr54B
2.18674	-2.12069	0	-4.18159	FBgn0022987_CG4816_E014_qkr54B	FBgn0022987	CG4816	E014	qkr54B
1.86109	0	0	0	FBgn0027835_CG5170_E003_Dp1	FBgn0027835	CG5170	E003	Dp1
2.1712	-1.87027	0	0	FBgn0013325_CG7726_E001_RpL11	FBgn0013325	CG7726	E001	RpL11
1.79927	0	0	0	FBgn0250850_CG30149_E002_rig	FBgn0250850	CG30149	E002	rig
2.08391	0	0	0	FBgn0250850_CG30149_E003_rig	FBgn0250850	CG30149	E003	rig
-1.12551	0	0	0	FBgn0034646_CG9862_E001_Rae1	FBgn0034646	CG9862	E001	Rae1
1.01131	0	0	0	FBgn0034646_CG9862_E002_Rae1	FBgn0034646	CG9862	E002	Rae1
1.93619	-2.7492	0	0	FBgn0022986_CG3613_E001_qkr58E-1	FBgn0022986	CG3613	E001	qkr58E-1
1.5631	0	-2.92556	0	FBgn0022985_CG5821_E008_qkr58E-2	FBgn0022985	CG5821	E008	qkr58E-2
0.991157	-1.09429	0	0	FBgn0034743_CG4046_E003_RpS16	FBgn0034743	CG4046	E003	RpS16
1.09511	-1.13345	0	0	FBgn0010078_CG3661_E001_RpL23	FBgn0010078	CG3661	E001	RpL23
1.77929	-2.22339	0	0	FBgn0034968_CG3195_E002_RpL12	FBgn0034968	CG3195	E002	RpL12
1.72679	0	0	0	FBgn0015544_CG13570_E006_spag	FBgn0015544	CG13570	E006	spag
1.15792	-1.00193	0	0	FBgn0035016_CG4612_E004_CG4612	FBgn0035016	CG4612	E004	CG4612
1.79028	0	0	0	FBgn0035047_CG3691_E006_Pof	FBgn0035047	CG3691	E006	Pof
-1.63411	0	0	0	FBgn0035047_CG3691_E008_Pof	FBgn0035047	CG3691	E008	Pof
1.34494	-1.46887	0	0	FBgn0285950_CG2746_E004_RpL19	FBgn0285950	CG2746	E004	RpL19
1.46514	0	-1.84822	-1.78149	FBgn0023519_CG3109_E004_mRpL16	FBgn0023519	CG3109	E004	mRpL16
0	0	0	0	FBgn0029715_CG11444_E001_CG11444	FBgn0029715	CG11444	E001	CG11444
1.90198	0	0	0	FBgn0263987_CG3249_E003_spoon	FBgn0263987	CG3249	E003	spoon
2.00629	0	0	0	FBgn0029833_CG5941_E005_MCTS1	FBgn0029833	CG5941	E005	MCTS1
0.958629	-1.34245	0	0	FBgn0014026_CG3314_E008_RpL7A	FBgn0014026	CG3314	E008	RpL7A
1.47731	-1.57245	-2.57368	0	FBgn0010412_CG4464_E001_RpS19a	FBgn0010412	CG4464	E001	RpS19a
0.678772	0	0	0	FBgn0010412_CG4464_E004_RpS19a	FBgn0010412	CG4464	E004	RpS19a
0.849779	0	0	0	FBgn0261791_CG9742_E004_SNRPG	FBgn0261791	CG9742	E004	SNRPG
-1.93231	2.63814	0	0	FBgn0002590_CG8922_E007_RpS5a	FBgn0002590	CG8922	E007	RpS5a
1.15176	-1.55762	0	0	FBgn0002590_CG8922_E008_RpS5a	FBgn0002590	CG8922	E008	RpS5a
0.796293	-1.08864	-2.67908	0	FBgn0285947_CG14206_E005_RpS10b	FBgn0285947	CG14206	E005	RpS10b
-2.7757	0	6.67159	0	FBgn0285947_CG14206_E008_RpS10b	FBgn0285947	CG14206	E008	RpS10b
-1.64258	0	2.69908	0	FBgn0024807_CG17686_E006_DIP1	FBgn0024807	CG17686	E006	DIP1
1.49491	0	0	0	FBgn0003559_CG17170_E009_su(f)	FBgn0003559	CG17170	E009	su(f)
1.93764	0	0	0	FBgn0266557_CG3696_E003_kis	FBgn0266557	CG3696	E003	kis
-0.967357	0	0	1.7555	FBgn0017457_CG3582_E001_U2af38	FBgn0017457	CG3582	E001	U2af38
0.697442	0	-0.962591	-1.48906	FBgn0017457_CG3582_E002_U2af38	FBgn0017457	CG3582	E002	U2af38
1.48316	0	0	0	FBgn0261938_CG4644_E006_mtRNApol	FBgn0261938	CG4644	E006	mtRNApol
3.3797	0	0	0	FBgn0031492_CG3542_E005_Prp40	FBgn0031492	CG3542	E005	Prp40
2.09622	-1.12875	-2.86241	0	FBgn0001942_CG9075_E003_eIF4A	FBgn0001942	CG9075	E003	eIF4A
1.64463	-1.92013	0	0	FBgn0020497_CG13387_E001_emb	FBgn0020497	CG13387	E001	emb
0.73429	0	0	0	FBgn0020497_CG13387_E006_emb	FBgn0020497	CG13387	E006	emb
-2.19802	0	0	0	FBgn0032156_CG13124_E002_CG13124	FBgn0032156	CG13124	E002	CG13124
1.8003	-1.34485	0	0	FBgn0005593_CG4897_E002_RpL7	FBgn0005593	CG4897	E002	RpL7
0.634878	-1.93898	0	0	FBgn0015756_CG6141_E004_RpL9	FBgn0015756	CG6141	E004	RpL9
1.11919	0	0	0	FBgn0015756_CG6141_E005_RpL9	FBgn0015756	CG6141	E005	RpL9
2.36266	0	-2.62845	0	FBgn0021761_CG4579_E010_Nup154	FBgn0021761	CG4579	E010	Nup154
2.02651	0	-3.23446	0	FBgn0283682_CG6181_E005_Ge-1	FBgn0283682	CG6181	E005	Ge-1
2.06486	0	0	0	FBgn0000114_CG31762_E005_bru1	FBgn0000114	CG31762	E005	bru1
2.03045	-2.18527	0	0	FBgn0000114_CG31762_E023_bru1	FBgn0000114	CG31762	E023	bru1
2.20844	-2.96057	0	0	FBgn0000114_CG31762_E024_bru1	FBgn0000114	CG31762	E024	bru1
-1.43427	0	0	0	FBgn0262475_CG43065_E006_bru2	FBgn0262475	CG43065	E006	bru2
1.37854	0	-1.83546	0	FBgn0286781_CG6582_E007_cass	FBgn0286781	CG6582	E007	cass
1.18563	-1.26722	0	0	FBgn0086710_CG10652_E005_RpL30	FBgn0086710	CG10652	E005	RpL30
1.39267	0	0	0	FBgn0003346_CG9999_E003_RanGAP	FBgn0003346	CG9999	E003	RanGAP
1.51696	0	-1.83925	0	FBgn0032822_CG10466_E002_CG10466	FBgn0032822	CG10466	E002	CG10466
-1.22825	0	1.38387	0	FBgn0032822_CG10466_E003_CG10466	FBgn0032822	CG10466	E003	CG10466
1.59276	0	-3.0493	0	FBgn0000559_CG2238_E006_eEF2	FBgn0000559	CG2238	E006	eEF2
1.07874	-0.444679	-1.34391	0	FBgn0051992_CG31992_E003_gw	FBgn0051992	CG31992	E003	gw
1.73265	-0.881822	-2.38679	0	FBgn0051992_CG31992_E010_gw	FBgn0051992	CG31992	E010	gw
1.48579	0	0	0	FBgn0023213_CG10811_E006_eIF4G1	FBgn0023213	CG10811	E006	eIF4G1
2.18028	0	-2.50697	0	FBgn0023213_CG10811_E007_eIF4G1	FBgn0023213	CG10811	E007	eIF4G1
1.48633	0	-1.80076	0	FBgn0051716_CG31716_E021_Cnot4	FBgn0051716	CG31716	E021	Cnot4
2.11052	-1.09553	-2.01486	0	FBgn0051716_CG31716_E022_Cnot4	FBgn0051716	CG31716	E022	Cnot4
0	-2.17048	0	0	FBgn0003261_CG10279_E019_Rm62	FBgn0003261	CG10279	E019	Rm62
0	-2.49671	0	0	FBgn0000504_CG11094_E007_dsx	FBgn0000504	CG11094	E007	dsx
0	2.06054	0	0	FBgn0003165_CG9755_E008_pum	FBgn0003165	CG9755	E008	pum
0	-1.16718	0	0	FBgn0002431_CG9484_E002_hyd	FBgn0002431	CG9484	E002	hyd
0	-1.45771	0	0	FBgn0028734_CG6203_E003_Fmr1	FBgn0028734	CG6203	E003	Fmr1
0	-1.21427	0	0	FBgn0003721_CG4898_E001_Tm1	FBgn0003721	CG4898	E001	Tm1
0	-1.3369	0	0	FBgn0003721_CG4898_E003_Tm1	FBgn0003721	CG4898	E003	Tm1
0	-1.36422	0	0	FBgn0003721_CG4898_E004_Tm1	FBgn0003721	CG4898	E004	Tm1
0	-0.826716	0	0	FBgn0003721_CG4898_E028_Tm1	FBgn0003721	CG4898	E028	Tm1
0	-0.954391	0	0	FBgn0003721_CG4898_E036_Tm1	FBgn0003721	CG4898	E036	Tm1
0	3.03476	0	0	FBgn0263995_CG43738_E001_cpo	FBgn0263995	CG43738	E001	cpo
0	-2.03694	0	0	FBgn0263995_CG43738_E002_cpo	FBgn0263995	CG43738	E002	cpo
0	-11.7472	0	0	FBgn0263995_CG43738_E004_cpo	FBgn0263995	CG43738	E004	cpo
0	-1.09003	0	0	FBgn0263995_CG43738_E023_cpo	FBgn0263995	CG43738	E023	cpo
0	-1.43971	-2.91067	0	FBgn0026250_CG8053_E003_eIF1A	FBgn0026250	CG8053	E003	eIF1A
0	-1.37071	-2.61239	0	FBgn0019936_CG15693_E001_RpS20	FBgn0019936	CG15693	E001	RpS20
0	-2.16195	0	-3.48056	FBgn0264491_CG10293_E007_how	FBgn0264491	CG10293	E007	how
0	-0.986082	0	0	FBgn0002622_CG6779_E001_RpS3	FBgn0002622	CG6779	E001	RpS3
0	-0.76361	0	0	FBgn0043455_CG5986_E001_CG5986	FBgn0043455	CG5986	E001	CG5986
0	0.763397	0	0	FBgn0043455_CG5986_E003_CG5986	FBgn0043455	CG5986	E003	CG5986
0	-1.04189	0	0	FBgn0039261_CG6422_E013_Ythdf	FBgn0039261	CG6422	E013	Ythdf
0	2.6771	0	0	FBgn0085391_CG34362_E015_trv	FBgn0085391	CG34362	E015	trv
0	-1.79984	0	0	FBgn0265998_CG42320_E003_Doa	FBgn0265998	CG42320	E003	Doa
0	-1.81711	0	0	FBgn0265998_CG42320_E006_Doa	FBgn0265998	CG42320	E006	Doa
0	-1.98582	0	13.6991	FBgn0265998_CG42320_E007_Doa	FBgn0265998	CG42320	E007	Doa
0	2.22752	0	3.66657	FBgn0265998_CG42320_E011_Doa	FBgn0265998	CG42320	E011	Doa
0	-0.870287	0	0	FBgn0265998_CG42320_E018_Doa	FBgn0265998	CG42320	E018	Doa
0	-0.820956	0	0	FBgn0265998_CG42320_E021_Doa	FBgn0265998	CG42320	E021	Doa
0	-1.09857	0	0	FBgn0000557_CG1873_E003_eEF1alpha2	FBgn0000557	CG1873	E003	eEF1alpha2
0	-1.07474	0	0	FBgn0011224_CG31000_E019_heph	FBgn0011224	CG31000	E019	heph
0	-0.109795	0	0	FBgn0001233_CG1242_E002_Hsp83	FBgn0001233	CG1242	E002	Hsp83
0	-0.957763	0	0	FBgn0052423_CG32423_E001_shep	FBgn0052423	CG32423	E001	shep
0	-1.08042	0	0	FBgn0052423_CG32423_E002_shep	FBgn0052423	CG32423	E002	shep
0	0.838277	0	0	FBgn0263106_CG10578_E001_DnaJ-1	FBgn0263106	CG10578	E001	DnaJ-1
0	-0.189188	0	0	FBgn0263106_CG10578_E003_DnaJ-1	FBgn0263106	CG10578	E003	DnaJ-1
0	-0.766686	0	0	FBgn0002775_CG8631_E001_msl-3	FBgn0002775	CG8631	E001	msl-3
0	0.626417	0	0	FBgn0002775_CG8631_E003_msl-3	FBgn0002775	CG8631	E003	msl-3
0	0.316589	0	0	FBgn0011787_CG5012_E002_mRpL12	FBgn0011787	CG5012	E002	mRpL12
0	-0.963366	0	0	FBgn0011206_CG4760_E002_bol	FBgn0011206	CG4760	E002	bol
0	-1.74533	0	0	FBgn0011206_CG4760_E012_bol	FBgn0011206	CG4760	E012	bol
0	-1.55812	0	0	FBgn0011206_CG4760_E013_bol	FBgn0011206	CG4760	E013	bol
0	-1.06773	0	0	FBgn0015218_CG4035_E005_eIF4E1	FBgn0015218	CG4035	E005	eIF4E1
0	-1.69744	0	0	FBgn0015218_CG4035_E006_eIF4E1	FBgn0015218	CG4035	E006	eIF4E1
0	-2.29175	0	0	FBgn0015218_CG4035_E007_eIF4E1	FBgn0015218	CG4035	E007	eIF4E1
0	-1.90056	-2.0619	0	FBgn0035987_CG3689_E007_Cpsf5	FBgn0035987	CG3689	E007	Cpsf5
0	-1.84315	-3.17623	0	FBgn0010408_CG3395_E003_RpS9	FBgn0010408	CG3395	E003	RpS9
0	-0.840049	0	0	FBgn0010408_CG3395_E007_RpS9	FBgn0010408	CG3395	E007	RpS9
0	-0.703808	0	0	FBgn0036213_CG7283_E003_RpL10Ab	FBgn0036213	CG7283	E003	RpL10Ab
0	-1.06305	0	0	FBgn0022959_CG5654_E003_yps	FBgn0022959	CG5654	E003	yps
0	-0.943252	0	0	FBgn0036258_CG5642_E004_eIF3l	FBgn0036258	CG5642	E004	eIF3l
0	0	0	0	FBgn0261933_CG10753_E001_SmD1	FBgn0261933	CG10753	E001	SmD1
0	-0.650368	0	0	FBgn0036335_CG11258_E003_mRpL20	FBgn0036335	CG11258	E003	mRpL20
0	-1.43089	0	0	FBgn0036534_CG6169_E010_DCP2	FBgn0036534	CG6169	E010	DCP2
0	-1.52119	0	0	FBgn0036534_CG6169_E011_DCP2	FBgn0036534	CG6169	E011	DCP2
0	-2.0789	0	0	FBgn0263603_CG5215_E005_Zn72D	FBgn0263603	CG5215	E005	Zn72D
0	-1.36087	0	0	FBgn0260943_CG32169_E006_Rbp6	FBgn0260943	CG32169	E006	Rbp6
0	-1.7954	0	0	FBgn0260943_CG32169_E007_Rbp6	FBgn0260943	CG32169	E007	Rbp6
0	0.984655	0	0	FBgn0260943_CG32169_E010_Rbp6	FBgn0260943	CG32169	E010	Rbp6
0	-1.66507	0	-3.07824	FBgn0036734_CG7564_E005_CG7564	FBgn0036734	CG7564	E005	CG7564
0	-1.88489	-2.00588	0	FBgn0004401_CG6143_E007_Pep	FBgn0004401	CG6143	E007	Pep
0	-2.05629	0	0	FBgn0004401_CG6143_E008_Pep	FBgn0004401	CG6143	E008	Pep
0	-1.25483	0	0	FBgn0036853_CG9730_E004_mRpL21	FBgn0036853	CG9730	E004	mRpL21
0	2.03391	0	0	FBgn0005386_CG8887_E007_ash1	FBgn0005386	CG8887	E007	ash1
0	-1.11086	0	0	FBgn0037081_CG6049_E004_barc	FBgn0037081	CG6049	E004	barc
0	-1.85831	0	0	FBgn0037081_CG6049_E008_barc	FBgn0037081	CG6049	E008	barc
0	-0.984703	-1.62812	0	FBgn0037135_CG7414_E002_CG7414	FBgn0037135	CG7414	E002	CG7414
0	-1.5455	-2.39217	0	FBgn0262737_CG7437_E003_mub	FBgn0262737	CG7437	E003	mub
0	-1.65162	-1.88848	0	FBgn0262737_CG7437_E006_mub	FBgn0262737	CG7437	E006	mub
0	-1.31996	0	0	FBgn0262737_CG7437_E008_mub	FBgn0262737	CG7437	E008	mub
0	1.53573	0	0	FBgn0002774_CG11680_E006_mle	FBgn0002774	CG11680	E006	mle
0	-0.48452	0	0	FBgn0033351_CG8235_E002_AIMP1	FBgn0033351	CG8235	E002	AIMP1
0	-0.956748	0	0	FBgn0004907_CG17870_E016_14-3-3zeta	FBgn0004907	CG17870	E016	14-3-3zeta
0	-1.47202	0	0	FBgn0262739_CG6671_E010_AGO1	FBgn0262739	CG6671	E010	AGO1
0	-1.22135	0	0	FBgn0033889_CG6701_E003_CG6701	FBgn0033889	CG6701	E003	CG6701
0	-1.28348	0	0	FBgn0033902_CG8309_E003_eIF3m	FBgn0033902	CG8309	E003	eIF3m
0	-1.1873	0	0	FBgn0261854_CG42783_E001_aPKC	FBgn0261854	CG42783	E001	aPKC
0	-3.78843	0	0	FBgn0261854_CG42783_E002_aPKC	FBgn0261854	CG42783	E002	aPKC
0	-12.4478	0	0	FBgn0261854_CG42783_E022_aPKC	FBgn0261854	CG42783	E022	aPKC
0	-3.49357	0	0	FBgn0261854_CG42783_E023_aPKC	FBgn0261854	CG42783	E023	aPKC
0	-0.634394	0	0	FBgn0034138_CG8332_E004_RpS15	FBgn0034138	CG8332	E004	RpS15
0	-1.20787	-1.53318	0	FBgn0265487_CG33197_E003_mbl	FBgn0265487	CG33197	E003	mbl
0	1.11882	0	0	FBgn0265487_CG33197_E017_mbl	FBgn0265487	CG33197	E017	mbl
0	-1.48277	0	0	FBgn0040273_CG7626_E008_Spt5	FBgn0040273	CG7626	E008	Spt5
0	-1.23002	0	0	FBgn0013325_CG7726_E002_RpL11	FBgn0013325	CG7726	E002	RpL11
0	-1.45846	0	0	FBgn0003435_CG9218_E017_sm	FBgn0003435	CG9218	E017	sm
0	-0.518953	0	0	FBgn0034654_CG10306_E001_eIF3k	FBgn0034654	CG10306	E001	eIF3k
0	0.667297	0	0	FBgn0034654_CG10306_E002_eIF3k	FBgn0034654	CG10306	E002	eIF3k
0	-0.983325	-1.81065	0	FBgn0004362_CG17950_E001_HmgD	FBgn0004362	CG17950	E001	HmgD
0	-1.01476	0	0	FBgn0004362_CG17950_E007_HmgD	FBgn0004362	CG17950	E007	HmgD
0	-1.10059	-2.23288	0	FBgn0000562_CG4051_E009_egl	FBgn0000562	CG4051	E009	egl
0	-0.537685	0	0	FBgn0034968_CG3195_E003_RpL12	FBgn0034968	CG3195	E003	RpL12
0	-0.963557	0	0	FBgn0023519_CG3109_E001_mRpL16	FBgn0023519	CG3109	E001	mRpL16
0	1.03858	0	0	FBgn0023519_CG3109_E003_mRpL16	FBgn0023519	CG3109	E003	mRpL16
0	-1.44548	0	0	FBgn0023512_CG3806_E001_eIF2Bepsilon	FBgn0023512	CG3806	E001	eIF2Bepsilon
0	0	0	0	FBgn0266570_CG2982_E003_NO66	FBgn0266570	CG2982	E003	NO66
0	-1.65473	0	0	FBgn0263987_CG3249_E010_spoon	FBgn0263987	CG3249	E010	spoon
0	-1.09897	0	0	FBgn0014026_CG3314_E007_RpL7A	FBgn0014026	CG3314	E007	RpL7A
0	-1.48694	0	0	FBgn0014026_CG3314_E010_RpL7A	FBgn0014026	CG3314	E010	RpL7A
0	-0.973839	0	0	FBgn0027084_CG12141_E006_LysRS	FBgn0027084	CG12141	E006	LysRS
0	3.48373	14.8369	0	FBgn0003321_CG1664_E010_sbr	FBgn0003321	CG1664	E010	sbr
0	1.26252	0	0	FBgn0086675_CG4396_E001_fne	FBgn0086675	CG4396	E001	fne
0	-0.629383	0	0	FBgn0030571_CG14414_E003_CG14414	FBgn0030571	CG14414	E003	CG14414
0	-0.618843	0	0	FBgn0030571_CG14414_E005_CG14414	FBgn0030571	CG14414	E005	CG14414
0	-0.736501	0	0	FBgn0030571_CG14414_E006_CG14414	FBgn0030571	CG14414	E006	CG14414
0	1.2753	0	0	FBgn0030571_CG14414_E008_CG14414	FBgn0030571	CG14414	E008	CG14414
0	1.88514	0	0	FBgn0026428_CG6170_E001_HDAC6	FBgn0026428	CG6170	E001	HDAC6
0	-4.00086	0	0	FBgn0026428_CG6170_E002_HDAC6	FBgn0026428	CG6170	E002	HDAC6
0	-0.884636	-2.22787	0	FBgn0278608_CG12223_E016_Dsp1	FBgn0278608	CG12223	E016	Dsp1
0	-1.26047	0	0	FBgn0004227_CG4211_E007_nonA	FBgn0004227	CG4211	E007	nonA
0	1.22775	0	0	FBgn0286809_CG46386_E002_xmas	FBgn0286809	CG46386	E002	xmas
0	0.586684	0	0	FBgn0030956_CG18259_E001_CG18259	FBgn0030956	CG18259	E001	CG18259
0	-1.42426	0	0	FBgn0285947_CG14206_E004_RpS10b	FBgn0285947	CG14206	E004	RpS10b
0	-1.69014	-2.97516	0	FBgn0285947_CG14206_E006_RpS10b	FBgn0285947	CG14206	E006	RpS10b
0	-1.00188	0	0	FBgn0010263_CG3151_E004_Rbp9	FBgn0010263	CG3151	E004	Rbp9
0	-1.00922	0	0	FBgn0010263_CG3151_E005_Rbp9	FBgn0010263	CG3151	E005	Rbp9
0	-1.82237	-2.61439	0	FBgn0015834_CG8882_E003_eIF3i	FBgn0015834	CG8882	E003	eIF3i
0	-1.37498	0	0	FBgn0014189_CG7269_E006_Hel25E	FBgn0014189	CG7269	E006	Hel25E
0	-1.03846	0	0	FBgn0001942_CG9075_E001_eIF4A	FBgn0001942	CG9075	E001	eIF4A
0	0.52994	1.4727	0	FBgn0031782_CG9226_E001_WDR79	FBgn0031782	CG9226	E001	WDR79
0	-0.792007	-2.05402	0	FBgn0031782_CG9226_E003_WDR79	FBgn0031782	CG9226	E003	WDR79
0	-1.42763	0	0	FBgn0004838_CG10377_E001_Hrb27C	FBgn0004838	CG10377	E001	Hrb27C
0	-0.729387	0	0	FBgn0004838_CG10377_E011_Hrb27C	FBgn0004838	CG10377	E011	Hrb27C
0	-1.35526	0	0	FBgn0031951_CG7138_E004_r2d2	FBgn0031951	CG7138	E004	r2d2
0	0.842497	0	0	FBgn0031951_CG7138_E005_r2d2	FBgn0031951	CG7138	E005	r2d2
0	0.037283	0	0	FBgn0010265_CG13389_E004_RpS13	FBgn0010265	CG13389	E004	RpS13
0	-0.833413	0	0	FBgn0032156_CG13124_E008_CG13124	FBgn0032156	CG13124	E008	CG13124
0	-0.934799	0	0	FBgn0032156_CG13124_E011_CG13124	FBgn0032156	CG13124	E011	CG13124
0	-1.26331	0	0	FBgn0032156_CG13124_E012_CG13124	FBgn0032156	CG13124	E012	CG13124
0	-1.03403	0	0	FBgn0032156_CG13124_E017_CG13124	FBgn0032156	CG13124	E017	CG13124
0	-0.437465	0	0	FBgn0032198_CG4912_E001_eEF1delta	FBgn0032198	CG4912	E001	eEF1delta
0	-1.72567	0	0	FBgn0032236_CG5108_E001_mRpS7	FBgn0032236	CG5108	E001	mRpS7
0	-2.89403	0	0	FBgn0051719_CG31719_E006_RluA-1	FBgn0051719	CG31719	E006	RluA-1
0	-1.40954	0	0	FBgn0051719_CG31719_E007_RluA-1	FBgn0051719	CG31719	E007	RluA-1
0	1.0275	0	0	FBgn0032261_CG6094_E004_CG6094	FBgn0032261	CG6094	E004	CG6094
0	1.71518	5.19949	0	FBgn0283682_CG6181_E013_Ge-1	FBgn0283682	CG6181	E013	Ge-1
0	-2.29852	0	0	FBgn0000114_CG31762_E002_bru1	FBgn0000114	CG31762	E002	bru1
0	-1.04617	0	0	FBgn0000114_CG31762_E007_bru1	FBgn0000114	CG31762	E007	bru1
0	1.45901	0	0	FBgn0000114_CG31762_E019_bru1	FBgn0000114	CG31762	E019	bru1
0	0.98295	0	0	FBgn0262475_CG43065_E004_bru2	FBgn0262475	CG43065	E004	bru2
0	1.6756	0	0	FBgn0262475_CG43065_E005_bru2	FBgn0262475	CG43065	E005	bru2
0	2.1792	0	0	FBgn0262475_CG43065_E007_bru2	FBgn0262475	CG43065	E007	bru2
0	-0.916414	0	0	FBgn0020443_CG6382_E009_eRF3	FBgn0020443	CG6382	E009	eRF3
0	-1.58681	0	-3.64741	FBgn0000183_CG6605_E001_BicD	FBgn0000183	CG6605	E001	BicD
0	-0.937815	0	0	FBgn0000183_CG6605_E002_BicD	FBgn0000183	CG6605	E002	BicD
0	-1.03766	0	0	FBgn0000183_CG6605_E004_BicD	FBgn0000183	CG6605	E004	BicD
0	-1.65718	-2.7835	0	FBgn0261597_CG10305_E002_RpS26	FBgn0261597	CG10305	E002	RpS26
0	-0.984705	0	0	FBgn0261597_CG10305_E006_RpS26	FBgn0261597	CG10305	E006	RpS26
0	-1.28578	-2.26945	0	FBgn0086710_CG10652_E001_RpL30	FBgn0086710	CG10652	E001	RpL30
0	1.02944	0	0	FBgn0284220_CG10223_E005_Top2	FBgn0284220	CG10223	E005	Top2
0	-1.24471	0	0	FBgn0262743_CG2637_E014_Fs(2)Ket	FBgn0262743	CG2637	E014	Fs(2)Ket
0	0.221449	0	0	FBgn0086683_CG17540_E002_Spf45	FBgn0086683	CG17540	E002	Spf45
0	-0.539674	0	0	FBgn0051992_CG31992_E008_gw	FBgn0051992	CG31992	E008	gw
0	-0.853248	0	0	FBgn0051992_CG31992_E009_gw	FBgn0051992	CG31992	E009	gw
0	-3.14586	0	0	FBgn0051992_CG31992_E013_gw	FBgn0051992	CG31992	E013	gw
0	-0.98224	0	0	FBgn0051992_CG31992_E017_gw	FBgn0051992	CG31992	E017	gw
0	-0.681732	0	0	FBgn0023213_CG10811_E002_eIF4G1	FBgn0023213	CG10811	E002	eIF4G1
0	-1.11174	0	0	FBgn0023213_CG10811_E003_eIF4G1	FBgn0023213	CG10811	E003	eIF4G1
0	-0.752238	0	0	FBgn0023213_CG10811_E004_eIF4G1	FBgn0023213	CG10811	E004	eIF4G1
0	-0.764128	0	0	FBgn0023213_CG10811_E005_eIF4G1	FBgn0023213	CG10811	E005	eIF4G1
0	1.96629	0	3.02886	FBgn0023213_CG10811_E012_eIF4G1	FBgn0023213	CG10811	E012	eIF4G1
0	1.31748	0	2.86789	FBgn0023213_CG10811_E013_eIF4G1	FBgn0023213	CG10811	E013	eIF4G1
0	-1.82105	0	0	FBgn0024957_CG6342_E010_Irp-1B	FBgn0024957	CG6342	E010	Irp-1B
0	-0.697483	0	0	FBgn0033699_CG8857_E005_RpS11	FBgn0033699	CG8857	E005	RpS11
0	-0.98398	0	0	FBgn0031660_CG3782_E001_mRpL28	FBgn0031660	CG3782	E001	mRpL28
0	0	-2.27726	0	FBgn0051450_CG31450_E002_mRpS18A	FBgn0051450	CG31450	E002	mRpS18A
0	0	2.69032	0	FBgn0003721_CG4898_E031_Tm1	FBgn0003721	CG4898	E031	Tm1
0	0	2.97328	0	FBgn0003721_CG4898_E032_Tm1	FBgn0003721	CG4898	E032	Tm1
0	0	-2.32983	0	FBgn0266053_CG5208_E004_Patr-1	FBgn0266053	CG5208	E004	Patr-1
0	0	-1.72366	0	FBgn0266053_CG5208_E005_Patr-1	FBgn0266053	CG5208	E005	Patr-1
0	0	-2.87861	0	FBgn0051156_CG31156_E005_CG31156	FBgn0051156	CG31156	E005	CG31156
0	0	-4.01391	0	FBgn0024958_CG4900_E006_Irp-1A	FBgn0024958	CG4900	E006	Irp-1A
0	0	-2.23408	0	FBgn0039229_CG6995_E006_Saf-B	FBgn0039229	CG6995	E006	Saf-B
0	0	3.00301	3.0936	FBgn0265998_CG42320_E014_Doa	FBgn0265998	CG42320	E014	Doa
0	0	-1.18325	0	FBgn0035753_CG8615_E003_RpL18	FBgn0035753	CG8615	E003	RpL18
0	0	-1.88154	0	FBgn0004401_CG6143_E005_Pep	FBgn0004401	CG6143	E005	Pep
0	0	3.18492	0	FBgn0036825_CG6846_E004_RpL26	FBgn0036825	CG6846	E004	RpL26
0	0	-1.02939	0	FBgn0040075_CG9750_E003_rept	FBgn0040075	CG9750	E003	rept
0	0	-1.08288	0	FBgn0027086_CG11471_E008_IleRS	FBgn0027086	CG11471	E008	IleRS
0	0	2.84955	0	FBgn0034138_CG8332_E001_RpS15	FBgn0034138	CG8332	E001	RpS15
0	0	2.33812	0	FBgn0028737_CG6341_E003_eEF1beta	FBgn0028737	CG6341	E003	eEF1beta
0	0	-2.01782	0	FBgn0261067_CG4279_E003_LSm1	FBgn0261067	CG4279	E003	LSm1
0	0	2.7922	0	FBgn0266284_CG14788_E001_Ns3	FBgn0266284	CG14788	E001	Ns3
0	0	1.55678	0	FBgn0015818_CG3780_E002_Spx	FBgn0015818	CG3780	E002	Spx
0	0	-3.40767	0	FBgn0014026_CG3314_E006_RpL7A	FBgn0014026	CG3314	E006	RpL7A
0	0	-3.46045	0	FBgn0003321_CG1664_E007_sbr	FBgn0003321	CG1664	E007	sbr
0	0	-3.45232	0	FBgn0262734_CG4429_E006_eIF4H1	FBgn0262734	CG4429	E006	eIF4H1
0	0	3.26515	0	FBgn0010412_CG4464_E007_RpS19a	FBgn0010412	CG4464	E007	RpS19a
0	0	4.90665	0	FBgn0010265_CG13389_E002_RpS13	FBgn0010265	CG13389	E002	RpS13
0	0	-3.12004	0	FBgn0010265_CG13389_E005_RpS13	FBgn0010265	CG13389	E005	RpS13
0	0	-2.38515	0	FBgn0265298_CG5442_E008_SC35	FBgn0265298	CG5442	E008	SC35
0	0	-2.3736	0	FBgn0024183_CG4170_E006_vig	FBgn0024183	CG4170	E006	vig
0	0	3.284	0	FBgn0261597_CG10305_E004_RpS26	FBgn0261597	CG10305	E004	RpS26
0	0	-3.05934	0	FBgn0003346_CG9999_E008_RanGAP	FBgn0003346	CG9999	E008	RanGAP
0	0	-2.39656	0	FBgn0064225_CG17489_E001_RpL5	FBgn0064225	CG17489	E001	RpL5
0	0	-1.90974	0	FBgn0033699_CG8857_E002_RpS11	FBgn0033699	CG8857	E002	RpS11
0	0	-2.51288	-3.30369	FBgn0051716_CG31716_E023_Cnot4	FBgn0051716	CG31716	E023	Cnot4
0	0	0	2.18077	FBgn0000504_CG11094_E003_dsx	FBgn0000504	CG11094	E003	dsx
0	0	0	2.11375	FBgn0261552_CG42670_E010_ps	FBgn0261552	CG42670	E010	ps
0	0	0	2.30921	FBgn0003721_CG4898_E011_Tm1	FBgn0003721	CG4898	E011	Tm1
0	0	0	1.66218	FBgn0003721_CG4898_E014_Tm1	FBgn0003721	CG4898	E014	Tm1
0	0	0	5.56001	FBgn0027948_CG5000_E009_msps	FBgn0027948	CG5000	E009	msps
0	0	0	3.13983	FBgn0027948_CG5000_E016_msps	FBgn0027948	CG5000	E016	msps
0	0	0	1.39144	FBgn0038953_CG18596_E001_CG18596	FBgn0038953	CG18596	E001	CG18596
0	0	0	2.77732	FBgn0004903_CG6354_E011_Rb97D	FBgn0004903	CG6354	E011	Rb97D
0	0	0	0.932887	FBgn0015737_CG3373_E002_Hmu	FBgn0015737	CG3373	E002	Hmu
0	0	0	0.579627	FBgn0015737_CG3373_E003_Hmu	FBgn0015737	CG3373	E003	Hmu
0	0	0	-2.40232	FBgn0015737_CG3373_E004_Hmu	FBgn0015737	CG3373	E004	Hmu
0	0	0	14.0879	FBgn0085383_CG34354_E004_CG34354	FBgn0085383	CG34354	E004	CG34354
0	0	0	0	FBgn0027873_CG1957_E002_Cpsf100	FBgn0027873	CG1957	E002	Cpsf100
0	0	0	-12.4893	FBgn0011224_CG31000_E041_heph	FBgn0011224	CG31000	E041	heph
0	0	0	2.99987	FBgn0028577_CG12085_E011_hfp	FBgn0028577	CG12085	E011	hfp
0	0	0	1.42108	FBgn0035235_CG7879_E001_CG7879	FBgn0035235	CG7879	E001	CG7879
0	0	0	-2.65233	FBgn0004875_CG10847_E017_enc	FBgn0004875	CG10847	E017	enc
0	0	0	2.65133	FBgn0052062_CG32062_E007_Rbfox1	FBgn0052062	CG32062	E007	Rbfox1
0	0	0	2.4243	FBgn0041775_CG10686_E006_tral	FBgn0041775	CG10686	E006	tral
0	0	0	2.89515	FBgn0260943_CG32169_E015_Rbp6	FBgn0260943	CG32169	E015	Rbp6
0	0	0	2.68592	FBgn0260943_CG32169_E016_Rbp6	FBgn0260943	CG32169	E016	Rbp6
0	0	0	2.55471	FBgn0033352_CG8232_E001_PAN2	FBgn0033352	CG8232	E001	PAN2
0	0	0	2.6085	FBgn0264962_CG10228_E009_Pcf11	FBgn0264962	CG10228	E009	Pcf11
0	0	0	4.43395	FBgn0261854_CG42783_E013_aPKC	FBgn0261854	CG42783	E013	aPKC
0	0	0	3.64778	FBgn0023441_CG8205_E013_fus	FBgn0023441	CG8205	E013	fus
0	0	0	-2.55443	FBgn0034087_CG8443_E002_clu	FBgn0034087	CG8443	E002	clu
0	0	0	-4.02115	FBgn0027835_CG5170_E016_Dp1	FBgn0027835	CG5170	E016	Dp1
0	0	0	-1.57326	FBgn0034921_CG11183_E001_DCP1	FBgn0034921	CG11183	E001	DCP1
0	0	0	1.41904	FBgn0034921_CG11183_E002_DCP1	FBgn0034921	CG11183	E002	DCP1
0	0	0	0	FBgn0013764_CG3924_E001_Chi	FBgn0013764	CG3924	E001	Chi
0	0	0	3.22675	FBgn0035064_CG16912_E005_TyrRS-m	FBgn0035064	CG16912	E005	TyrRS-m
0	0	0	1.12262	FBgn0029979_CG10777_E003_mahe	FBgn0029979	CG10777	E003	mahe
0	0	0	1.47554	FBgn0016977_CG18497_E015_spen	FBgn0016977	CG18497	E015	spen
0	0	0	0	FBgn0031868_CG10354_E001_Rat1	FBgn0031868	CG10354	E001	Rat1
0	0	0	-2.4912	FBgn0263133_CG4567_E002_mEFG1	FBgn0263133	CG4567	E002	mEFG1
0	0	0	1.6751	FBgn0263133_CG4567_E003_mEFG1	FBgn0263133	CG4567	E003	mEFG1
0	0	0	3.78156	FBgn0000114_CG31762_E008_bru1	FBgn0000114	CG31762	E008	bru1
0	0	0	-2.316	FBgn0023213_CG10811_E001_eIF4G1	FBgn0023213	CG10811	E001	eIF4G1
0	0	0	-2.50961	FBgn0023213_CG10811_E014_eIF4G1	FBgn0023213	CG10811	E014	eIF4G1
0	0	0	3.13317	FBgn0010278_CG4817_E003_Ssrp	FBgn0010278	CG4817	E003	Ssrp

## Sheet: heatmap_log2FC_genes
	IFMvsbru1IR	IFMvssalm	IFMvstdt	IFMvsleg
14-3-3zeta	0	0	0	0.578439
4E-T	0	0	0	0
abs	0	0	0	0
Acn	0	0	0	0
Adar	1.50761	0	0	0.698491
Adat1	0	-1.98952	0	0
AGO1	0	0	0	-0.791308
AGO2	0	0	0	0
AIMP1	0	0	0	0.815633
AlaRS	0	0	0.717632	-0.537786
AlaRS-m	0	0	0	0.723942
alpha-PheRS	0	0	0	0
aPKC	0	0	0	-0.871729
apt	1.06806	0	1.25398	0
Arc1	-4.42043	-2.83905	-3.36912	0
ArgRS	-0.971965	0	0	0
Ars2	0	0	0	0
ash1	0	0	0	-0.607123
AspRS-m	0	0	0	0
Atx2	0.883488	0	0	-0.415919
B52	0	0	-0.81287	0
barc	0	0	0	0.588595
bel	0	0	1.30284	0.532584
beta-PheRS	0	0	0	0
bic	0.701396	0	0.904862	0.548792
BicD	0	0	0	-0.415626
bin3	0	0	-0.963732	-0.407557
bol	0	0	-1.45486	0
brat	0	0	-1.45499	-1.89865
bru1	1.925	2.57676	2.25337	5.96548
bru2	1.37913	1.40753	2.31054	2.10765
bru3	0	0	0	0
bsf	0	0	1.40869	0.808108
btz	0	0	0	0
c12.1	0	0	0	-0.853899
Caper	0	0	0	0
Capr	0	0	0	0
cass	0	0	-1.16358	0
caz	0	0	0	0
Cbp20	0	0	-0.913353	0
Cbp80	-0.764537	0	0	-0.472418
CG10038	0	0	0	0
CG10077	0	0	0	0
CG10189	0	0	0	0
CG10333	0	0	0	0
CG10341	0	0	0	0
CG10418	0	0	0	0
CG10463	-1.23402	0	0	0
CG10466	0	0	0	0
CG10803	0	0	0	-0.984047
CG10948	0	0	0	1.27945
CG11109	0	0	0	0
CG11123	-0.967389	0	0	0
CG11414	0	1.248	0.985517	1.10443
CG11444	0	1.14016	0	0.738629
CG11454	0	0	0	0.985617
CG12259	0	0	0	0
CG13096	0	0	0	0
CG13124	-0.882142	0	-2.14131	-0.416583
CG1316	0	0	0	0
CG14100	0	0	0	0
CG14230	0	0	0	0
CG1434	0	0	0	0
CG14414	0	0	0	0
CG14641	-0.757513	0	-0.805654	0
CG15014	0	0	0	0
CG1582	0	0	0	0
CG1677	0.593096	0	0	0
CG17454	0	0	0	0
CG18178	0	0	0	0
CG18259	0	0	0	0
CG18596	0	0	2.26019	0
CG2021	0	2.04869	0	1.66576
CG2091	0	0	0	0
CG2100	0	0	0	1.02573
CG2145	0	-1.11388	-2.66428	-1.60951
CG2701	0	0	0	0
CG2931	0	0	0	0
CG30122	0	0	0	0
CG31156	0	0	0	0
CG31368	0	0	0	0
CG31957	0	0	0	0
CG32344	0	0	0	0
CG32533	0	0	0	0
CG32708	0	0	0	0
CG3335	-1.03146	0	0	0
CG34354	0	0	0	0
CG3527	0	0	0	0
CG3594	0	0	0	0
CG4038	0	0	0	0
CG4119	0	0	0	0
CG42458	0	0	0	-1.22679
CG4266	0	0	0	0
CG4611	0	0	0	0.576594
CG4612	0	0	-0.898602	-0.825153
CG4679	0	0	1.83138	0.735035
CG4709	0	0	0	0
CG4806	0	0	0	0
CG4887	0	0	0	0
CG4896	0	0	0	0
CG5316	0	0	0	0
CG5641	0	0	0	0
CG5728	-0.870786	0	0	0
CG5800	0	0	0	0
CG5913	-1.34133	0	-1.02984	0
CG5986	0	0	0	0
CG6066	0	0	0	0
CG6094	0	1.72118	1.1479	1.77397
CG6227	0	0	0	0
CG6388	-0.899239	0	0	0
CG6418	0	0	0	0
CG6701	0	0	1.03845	0
CG6712	0	0	0	0
CG6937	0	0	0	0
CG6961	0	0	0	0
CG7414	0	0.881811	0	0.599297
CG7483	0	0	0	0
CG7488	0	1.01572	0	0.87286
CG7564	0	0	1.0174	0
CG7849	0	0	0	0
CG7878	0	0	0	0
CG7879	0	0	0	0
CG7903	0	0	-1.07272	0
CG8036	1.45138	0	1.58395	2.11299
CG8078	0	0	0	0
CG8441	0	0	0	0
CG8545	0	0	0	0.658545
CG8611	0	0	0	0
CG8963	-1.25379	0	0	0
CG9004	0	0	0	0
CG9107	0	0	0	0
CG9143	-0.864611	0	0	0.714947
CG9253	0	0	0	0
CG9344	0	0	0	0
CG9346	0	0	0	0
CG9609	0	0	0	0
CG9630	0	0	0	0
CG9705	0	0	0	0.639588
Chi	0	0	0	0
Chrac-14	0	0	0	0
CkIIalpha	0	0	0	0
Clbn	-0.790187	-1.03934	0	0
clu	0	1.32477	2.17799	0.748551
CNBP	0	0	0	0.981796
Cnot4	0	0.712985	0	0
cpo	1.15881	0	-1.24239	-3.21069
Cpsf100	0	0	0	0
Cpsf5	0	0	0	0
Cpsf6	0	0	0	0
CstF64	0	0	0	0
cyp33	0	0	0	0
CysRS	0	0	0.953483	0.951593
D	1.95947	1.18246	2.30012	3.71817
dbe	0	0	0	0
Dbp21E2	0	1.10012	1.17069	0.849334
Dbp45A	-1.23478	0	0	0
Dbp80	0	-1.60433	-2.05947	-1.30549
DCP1	0	0	0	0
DCP2	0	0	0	-0.817986
Dcr-1	0	0	0	0
Dcr-2	0	-1.30482	0	0
Ddx1	0	0	0	0
Dhc64C	0	0	0.969869	0
Dhx15	0	0	0	0
DIP1	0.880059	1.14933	0	0
Dis3	0	0	0	0
Dis3l2	0	0	0	-0.738554
DnaJ-1	1.3803	1.30843	0	0
Doa	0.731806	2.0113	1.13851	1.76631
Dp1	1.04648	0	1.8835	0
dre4	0	0	0	0
drosha	0	0	0	0
Dsp1	0	0	0	-0.925262
dsx	2.2607	0	0	0
Edc3	0	0	0	-0.627553
eEF1alpha1	0	0	0	0.398443
eEF1alpha2	0	0	1.66018	0.853057
eEF1beta	0.719356	0.923135	0.96663	1.65692
eEF1delta	0	1.76756	0	2.03242
eEF1gamma	0.721394	1.21879	1.30271	1.42946
eEF2	0	0.732739	0.938395	0.827614
eEF5	-2.16278	-2.46669	0	0
egl	0	0	0	0
eIF1	0	0	0	0.854515
eIF1A	0	0	0	0.404109
eIF2alpha	0	0.904245	0	1.10414
eIF2Balpha	0	0	0	0
eIF2Bbeta	0	0	0	0.527404
eIF2Bdelta	0	0	0	0
eIF2Bepsilon	0	0	0	0.68257
eIF2beta	0	0	0	0.572356
eIF2Bgamma	0	0	0	0
eIF2D	0	0	0	0.901626
eIF2gamma	0	0	0	0
eIF3a	0	0	0	0
eIF3b	0	0	0.850892	0.469548
eIF3c	0	0	0.727405	0
eIF3d1	0	0	0	0
eIF3e	0	0	0	0.481986
eIF3f1	0	0	0	0.428977
eIF3g1	0	0	0	0.424522
eIF3h	0	0	0	0.429797
eIF3i	0	0	0	0.413007
eIF3j	-0.852831	0	0	0
eIF3k	0	0	0	0.392063
eIF3l	0	0	0	0.423964
eIF3m	0	0	0	0.667656
eIF4A	0	1.04541	0.893673	0.448376
eIF4B	0	0	0	0
eIF4E1	0	1.04773	0.944083	0.720855
eIF4EHP	0	0	-0.815022	-0.786343
eIF4G1	0	0	-0.919282	0
eIF4G2	0	0	0	0
eIF4H1	0	0	0	0
eIF5	0	0	-2.09365	0
eIF5B	0	0	0	0
eIF6	0	0	0	0
elav	1.19858	0	0	-0.606606
emb	0	0	0	0
enc	0	0	-1.48131	-0.503818
eRF1	0	0	0	0.715225
eRF3	0	0	1.40053	0
exu	0	0	0	3.26835
Fib	-1.04855	0	0	0.640798
Fmr1	0	0	0	-0.745922
fne	0	0	-2.03308	-1.69599
Fs(2)Ket	0	0	0	0
fus	0	0	0	-1.89061
Ge-1	0	0	0	0
glo	0	0	0	0
GluProRS	0	0	1.21787	0.935585
GlyRS	0	0	1.07835	0
gw	0.838469	0	0	0.614873
HDAC6	0	0	0	-2.56486
Hel25E	-0.826042	0	0	0
Helz	0	0	0	0
heph	0	0	-3.99428	-1.24164
Hexim	0	0	-1.46676	0
hfp	0	0	0	0
His2Av	0	0	0	0.477567
HisRS	0	0	0	0
Hlc	0	0	-1.29318	0
HmgD	0	0	0	0
Hmu	0	0	0.887378	0
HnRNP-K	0	0	-1.09574	-1.04845
hoip	0	0	0	0.977971
how	-0.959875	0	-1.24281	-2.31285
Hrb27C	0	0	0	-0.583208
Hrb87F	0	0	0	0
Hrb98DE	0	0	0	0
hrg	0	0	0	0
Hsp83	0	0	0	0
hyd	0	-0.714248	0	0
IleRS	0	0	0	0
Imp	-1.13625	0	-1.20371	0
Irp-1A	0	0	1.0435	0
Irp-1B	0	0	0.925028	0
kin17	0	0	-1.18714	0
kis	0.604535	0	0	-0.327041
kz	0	0	0	0
l(1)G0004	0	0	0	0
l(1)G0007	0.893263	0	0	0
l(1)G0020	0	0	0	0
l(2)37Cb	0	0	0	0
l(3)07882	0	0	0	0
l(3)72Ab	0	0	0	0
La	-0.995708	0	0	0
lark	0	0	0	0
larp	0	0	0	0
Larp4B	0	0	-0.74486	0
Larp7	0	0	0	0
lig	0	0	0	0
lola	0.570671	0	0	-0.588034
lolal	0	0	-0.898816	-1.04981
Lon	0	0	1.16947	0.5554
loqs	0	0	0	-0.747764
lost	-2.22776	-0.96351	-0.893769	-0.77111
Lrpprc2	1.17049	1.45459	1.73115	1.2604
LSm1	0	0	0	0
Lsm10	0	0	0	0
LSm3	0	0	0	0
LSm7	0	0	0	0
LysRS	0	0	0	0.488204
mago	0	0	0	0.959909
mahe	0	0	0	-1.02226
mask	0	0	0	-0.271697
Mat89Ba	0	0	0	0
MBD-R2	0	0	0	0
mbf1	0	0	1.21057	0.466321
mbl	1.13927	0	0	-2.99818
MCTS1	0	0	0	0.863539
me31B	0	0	0	0
mEFG1	0	1.5541	2.00857	0.817765
mEFTs	0	1.56101	1.34404	1.30127
mEFTu1	1.79503	2.9715	2.88253	3.27027
mEFTu2	0	1.75517	1.47686	2.0657
Mi-2	0	0	0	0
mIF2	0	1.00729	1.7521	0.880946
mle	0	0	0	-0.807583
mod	-1.13902	0	0	0
mof	0	0	0	0
mRF1	0	0	0	1.59063
MRG15	0	0	0	0.646413
mRpL1	0	2.00132	1.60313	2.58371
mRpL12	0	1.86179	2.0307	2.3388
mRpL13	0	1.12601	0.902573	1.30419
mRpL16	0	2.47878	1.61851	2.88381
mRpL2	0	2.15501	1.65148	2.06595
mRpL20	0	1.23722	1.13119	1.56155
mRpL21	0	1.31416	1.52738	1.66558
mRpL28	1.01585	2.21093	0.784389	2.21939
mRpL44	0	2.81988	2.47872	2.70156
mRpS11	0	1.13247	1.84879	1.50419
mRpS18A	0	2.26153	1.95306	2.50402
mRpS5	0	0	0	0
mRpS6	0	2.34157	2.03846	2.96728
mRpS7	1.20295	2.02696	0.939516	1.93826
msi	1.41054	0	0	-2.24251
msl-3	0	0	0	0
msps	0	0	0	-0.387791
mTerf3	0	0	0	0.794511
Mtor	0	0	1.07308	0
MTPAP	1.30351	1.56222	1.67766	1.44302
Mtr4	0	0	0	0
mtRNApol	0	1.1618	1.83101	1.37437
mub	-1.18417	-1.8488	-1.27375	-2.08906
mxt	-1.3522	0	-1.59489	-0.522085
Nab2	0	0	0	0
NAT1	0	0	0	0
Nbr	0	0	0	0
ncd	0	0	-1.98046	0
ncm	0	0	0	0
Nelf-A	0.859456	0	0	0
NELF-B	0	0	0	0
Nelf-E	0	0	0	0
Neos	0	0	0	0
NHP2	0	0	0	0
NiPp1	0	0	0	0
nito	0	0	0	0
Nmd3	0	0	0	0
NO66	-1.21762	0	0	0.871728
nonA	0	0	0	0
nop5	-0.698746	0	0	0.621021
Nop56	0	0	0	0.715972
Nop60B	0	0	0	1.34514
Not1	0	-0.782809	-0.725243	0
Ns3	0	0	0	0
Nsun2	0	0	0	0
Nup153	0	0	0	0
Nup154	0	0	0	0
Nup214	0	0	0	0
Nup358	0	0	0	0
Nup50	-0.840363	0	0	0
obe	0	0	1.99438	0
orb2	0	0	-2.14113	0
pAbp	0	0	0	-0.55369
Pabp2	0	0	0	0
PAN2	0	0	0	0
papi	0	0	-1.10543	-1.15988
Parp	0	0	0	0
pasha	0	0	0	0
Patr-1	0	0	1.179	0
Pcf11	0.625998	0	0	0.553901
pcm	0	0	0	0
pea	0	0	0	0
peng	0	0	0	0
Pep	0	0	0	0
Phax	0	0	0	0
PheRS-m	1.31331	2.35094	2.00089	2.92098
pit	0	0	0	0
pix	0	0	1.29094	0.656332
PNPase	0	1.35555	1.87164	1.33866
Pof	0	0	0	0.79502
Pop4	0	0	0	0
Prp40	0	0	0	0
Prp8	0	0	0	0
ps	1.41906	0	0	0
Psi	0	0	0	-0.723711
pum	0	-1.22952	-0.773577	-0.979466
Pur-alpha	0	0	-2.28125	-1.66864
Pus1	0	0	0	0
Pus7	-0.9835	0	0	0
Pym	0	0	0	0
qkr54B	0	0	0	-1.57548
qkr58E-1	0	0	0	0
qkr58E-2	0	0	0	0
qkr58E-3	0.85308	0	0	0
r2d2	0	0	0	0
Rack1	0	1.38586	0	1.25453
Rae1	0	0	0	0
RanGAP	0	0	0	0
Rat1	0	0	0	0
Rb97D	0	0	0	0
Rbfox1	0.934324	0	-0.882896	0.574277
Rbp1	0	0	0	0
Rbp1-like	0	0	-1.32463	-0.469757
Rbp6	0	0	0	0
Rbp9	0	0	0	0
Ref1	0	0	0	0
Regnase-1	1.13194	0	0	0
rept	-1.05629	0	0	0
Rhau	0	0	0	0
rig	0	0	0	0
rin	0	0	0	-0.747113
rl	0	0	0	0
RluA-1	0	-2.79013	-4.07012	-2.90119
Rm62	0	0	0	0
RNaseX25	0	0	-0.726708	0
Rnmt	0	0	0	0
Rnp4F	0	0	0	1.09032
RnpS1	-0.913781	0	0	0
roq	0	1.22734	0	0
Rox8	0	0	0	-0.382351
RpA-70	-2.02663	0	-0.925878	0
Rpb7	0	0	0	0
RpII140	-1.13055	-1.05194	0	0
RpII215	-0.784576	0	0.936748	0
RpL10Ab	0	1.29972	1.35762	1.17752
RpL11	0.650756	1.08015	1.00602	1.29081
RpL12	0.898231	1.41467	0.9729	1.56169
RpL13A	0.999879	1.58328	1.07444	1.42763
RpL14	0.953914	1.55349	0	1.26318
RpL18	0.740003	1.0124	0.735562	1.36507
RpL19	0.949223	1.25545	0.781078	1.19481
RpL22	0	0	0.83585	1.26043
RpL23	0.891089	1.30203	0.785956	1.25198
RpL23A	0.911735	1.20788	0.911274	1.20838
RpL24	1.02096	1.10922	0	1.50072
RpL26	1.02938	1.04119	0.843427	1.58364
RpL3	0	1.00397	0	1.00699
RpL30	0.946366	1.72451	0.965441	1.51791
RpL37a	0.957973	1.24691	0	1.39628
RpL4	0.883486	1.1062	0	1.33178
RpL5	0	0	0	0.526404
RpL6	0.691771	1.1627	1.03143	1.34337
RpL7	0.638041	1.08184	1.19684	1.23667
RpL7A	0.601763	1.1048	0.749628	1.15284
RpL8	0.836844	1.17369	0.745748	1.27951
RpL9	0.633594	1.0568	0.908045	1.53875
RpS10b	0.850331	0.922526	0	1.52658
RpS11	0	1.12011	0.995779	1.56559
RpS13	0	1.45507	1.24945	1.55221
RpS15	0.926792	1.25942	0	1.45281
RpS16	0.908508	1.1957	0.913655	1.50517
RpS18	0.802549	1.13321	0.657558	1.25662
RpS19a	0.615624	0.91387	0.814175	1.26126
RpS2	0	1.60794	1.43674	1.59015
RpS20	0	1.00974	1.53051	1.79287
RpS21	1.10155	1.58716	0.759493	1.712
RpS26	1.06193	1.42407	0	1.42829
RpS27	0.715311	1.14966	0.844518	1.59924
RpS3	0.815898	1.48949	1.27726	1.3795
RpS4	0.809459	1.30903	0.999321	1.31744
RpS5a	0.619421	1.14553	0.782096	1.3831
RpS9	0.810765	1.54307	1.09295	1.50184
Rrp4	0	0	0	0
Rrp40	0	0	0	0
Rrp42	0	0	0	0
Rs1	0	0	0	0
Rsf1	0	0	-1.35717	0
rswl	2.12413	2.46761	2.14976	2.17792
rump	0	0	0	-0.51325
Saf-B	0	0	0	0
sbr	0	0	0	-0.434192
SC35	0	0	0	0
scaf6	0	0	0	0
Sec63	0	0	1.20247	0
Secp43	0	0	0	0.609313
SerRS	0	0	1.0645	0.615273
SF1	0	0	0	0
SF2	0	0	0	0
Sf3a1	0	0	0	0
Sf3b6	0	0	0	0
shep	0	-1.32554	-1.64496	-0.867275
Shmt	-1.1914	-1.99649	-1.85331	0
Slbp	0	0	0	0
SLIRP2	1.33705	1.98253	1.44873	2.19576
Slu7	0	0	0	0
sm	-1.56077	0	-0.964428	-1.48026
SmB	0	0	0	0
SmD1	0	0	0	0
SmD2	0	1.12979	0	1.15271
SmD3	0	0	-1.19008	0
SmF	0	0	0	0.831577
smg	0	0	0	-0.67031
Smg5	0	0	0	0
Smn	0	0	-1.12682	0
snama	0	0	0	0
snf	0	0	-0.810759	0
Snp	0	0	0	0
snRNP-U1-70K	0	0	0	0
snRNP-U1-C	0	0	0	0
SNRPG	0	0	0	0
Son	0	0	0	0
spag	-1.05875	0	0	0
spen	0.778152	-0.847621	-1.33632	0
Spf45	0	0	0	0
spoon	1.98864	1.95091	2.47975	1.87103
Spt5	0	0	0	0
Spt6	0.641274	0.788412	0	0
Spx	0	0	0	0.802162
sqd	0	0	0	0
Srp14	0	0	0	0
Srp19	0	0	0	0
Srp54	0	0	0	0
Srp54k	0	0	0	0
Srp68	0	0	0	0
Srp72	0	0	0	0
SrpRalpha	0	0	0	0
Srrm1	0	0	0	0
Ssb-c31a	0	0	0	1.67791
Ssrp	-1.56567	-1.5177	-0.944045	0
ssx	0	0	0	0
stau	0	0	0	0
stc	0	0	0	0
su(f)	0	0	0	0
su(sable)	1.34253	1.12986	1.39909	0.7106
Su(var)2-10	0	0	0	0
Su(var)205	0	0	0	0
su(w[a])	0	0	0	0
swm	0	0	0	0
Sxl	0	0	0	-0.773439
Syp	0	0	-1.43705	-1.05627
TBPH	0	0	0	-0.391705
Tdrd3	-2.08005	0	0	-0.624554
TER94	-1.74384	0	1.14407	0.290975
TFAM	1.45761	2.34866	1.33866	2.54462
TH1	0	0	0	0
tho2	0	0	0	0
ThrRS	0	0	1.30092	1.02655
Tis11	0	0	0	-1.08189
Tm1	0.99715	1.92264	0	1.28806
Top2	0	0	0	0
tra2	-1.01962	0	0	0
tral	0	0	0	0
Trap1	0	0	0.888754	0.874797
Trax	0	0	0	0
trsn	0	0	0	-1.13826
trv	0	0	-1.16815	-1.58288
tst	0	0	0	0
tsu	0	0	0	0
Tudor-SN	0	0	1.64994	0.682015
twin	0	0	0	-0.71713
TyrRS	0	0	0	0
TyrRS-m	0	1.76407	1.76273	2.17429
U2A	0	0	0	0
U2af38	0	0	0	0
U2af50	0	0	0	-0.491768
U4-U6-60K	0	0	0	-0.76845
Uba2	-0.882418	0	0	0
Ude	-3.6005	-2.05193	0	-1.90865
Unr	0	0	0	-0.711343
Upf1	0	0	0	0
Upf2	0	0	0	0
ValRS	0	0	1.14889	0
vig	0	0	0	0.478149
vig2	0	0	0	0.437268
Vps36	-1.87596	0	-1.52968	0
WDR79	0	0	0	0
x16	0	0	-1.01853	-0.783825
xmas	0	0	0	0
yps	0	1.21007	0	0.99742
Ythdc1	0	0	0	0
Ythdf	0	0	0	0
ytr	0	0	0	0
ZC3H3	1.53108	1.42176	0	0.720482
zfh2	0	0	0	0
Zn72D	0	0	0	0

## Sheet: Mfuzz_input
FBgn	NormMyo	Norm16h	Norm24h	Norm30h	Norm48h	Norm72h	Norm90h	Norm1d	StdNormMyo	StdNorm16h	StdNorm24h	StdNorm30h	StdNorm48h	StdNorm72h	StdNorm90h	StdNorm1d	symbol	CGnumber	new_FBgn
FBgn0029514	693	452	548	1192	1331	1177	1217	1597	-0.812563	-1.40085	-1.16651	0.405519	0.744824	0.368903	0.466545	1.39414	312	CG9166	FBgn0029514
FBgn0011710	5258	3949	2339	1729	1286	959	1158	1629	1.94152	1.08571	0.0330983	-0.365716	-0.655347	-0.869137	-0.739032	-0.431095	2001-09-01	CG1403	FBgn0011710
FBgn0000427	38	0	58	0	0	0	0	0	1.13768	-0.525082	2.01281	-0.525082	-0.525082	-0.525082	-0.525082	-0.525082	2001-12-01	CG2175	FBgn0000427
FBgn0014029	5223	3262	2048	2128	2166	2328	2411	1996	2.30256	0.51626	-0.589588	-0.516715	-0.4821	-0.334533	-0.258927	-0.636956	2002-09-01	CG4173	FBgn0014029
FBgn0259923	120	1084	3033	3307	381	546	757	688	-0.913043	-0.126823	1.46274	1.68621	-0.700176	-0.565606	-0.393518	-0.449793	2004-09-01	CG9699	FBgn0259923
FBgn0026361	1117	394	366	159	355	0	0	0	2.19373	0.25507	0.17999	-0.375063	0.150494	-0.801408	-0.801408	-0.801408	2005-09-01	CG2916	FBgn0026361
FBgn0010339	2497	3185	3178	4731	6145	1422	1185	931	-0.22642	0.15145	0.147605	1.00056	1.77717	-0.816841	-0.947009	-1.08651	128up	CG8340	FBgn0010339
FBgn0020238	65620	37306	23942	20621	9687	5751	7854	15766	2.12139	0.701469	0.0312743	-0.135271	-0.683603	-0.880991	-0.775527	-0.378746	14-3-3epsilon	CG31196	FBgn0020238
FBgn0004907	25380	30580	37577	52779	63423	71056	73935	52415	-1.39506	-1.11072	-0.728128	0.10312	0.685135	1.10251	1.25993	0.0832163	14-3-3zeta	CG17870	FBgn0004907
FBgn0010340	162	204	285	656	2236	1210	921	501	-0.878173	-0.817696	-0.701063	-0.166851	2.10823	0.630866	0.214729	-0.390039	140up	CG9852	FBgn0010340
FBgn0085813	264484	19715	9666	5981	10073	13049	2975	253222	1.66703	-0.457186	-0.544395	-0.576375	-0.540863	-0.515036	-0.602463	1.56929	18SrRNA-Psi:CR41602	CR41602	FBgn0085813
FBgn0004364	4706	2253	2417	2368	4367	2026	2146	1740	1.73669	-0.444481	-0.298655	-0.342225	1.43526	-0.646326	-0.539624	-0.900633	18w	CG8896	FBgn0287775
FBgn0250848	14671	24089	24824	18734	10456	5097	5686	5149	0.13079	1.26843	1.35722	0.621578	-0.378359	-1.0257	-0.954548	-1.01941	26-29-p	CG8947	FBgn0250848
FBgn0085771	85546	11330	8557	4479	8847	10948	7174	151899	0.915121	-0.458361	-0.509679	-0.585149	-0.504312	-0.46543	-0.535274	2.14308	28SrRNA-Psi:CR40741	CR40741	FBgn0085771
FBgn0085819	572764	10229	11947	4154	47463	18036	7460	409113	1.95092	-0.556885	-0.549226	-0.583968	-0.390894	-0.522081	-0.569229	1.22136	28SrRNA-Psi:CR41609	CR41609	FBgn0085819
FBgn0267515	101523	3801	2443	3170	6468	11126	3298	349166	0.34044	-0.463174	-0.474341	-0.468363	-0.441242	-0.402937	-0.46731	2.37693	28SrRNA-Psi:CR45855	CR45855	FBgn0267515
FBgn0267519	297062	22461	19392	12267	25236	33826	11284	361535	1.38275	-0.523597	-0.544902	-0.594366	-0.504332	-0.444698	-0.60119	1.83034	28SrRNA-Psi:CR45859	CR45859	FBgn0267519
FBgn0267520	15901	1998	1697	327	1563	790	617	25873	1.02915	-0.430096	-0.461689	-0.605483	-0.475754	-0.556887	-0.575045	2.0758	28SrRNA-Psi:CR45860	CR45860	FBgn0267520
FBgn0260793	0	557	495	100	40	309	546	194	-1.21786	1.20373	0.93418	-0.783103	-1.04396	0.125536	1.15591	-0.374433	2mit	CG42573	FBgn0260793
FBgn0052016	492	936	512	268	374	397	428	401	0.0798589	2.29594	0.179683	-1.03817	-0.509101	-0.394304	-0.239577	-0.374339	4E-T	CG32016	FBgn0052016
FBgn0004168	0	186	137	53	79	238	645	232	-0.979859	-0.0511774	-0.29583	-0.715235	-0.585419	0.208454	2.24057	0.178497	5-HT1A	CG16720	FBgn0004168
FBgn0263116	0	48	38	0	0	0	60	0	-0.705548	1.15014	0.763538	-0.705548	-0.705548	-0.705548	1.61406	-0.705548	5-HT1B	CG15113	FBgn0263116
FBgn0087012	0	89	93	62	131	242	1298	2371	-0.627271	-0.523068	-0.518384	-0.55468	-0.473893	-0.343931	0.892464	2.14876	5-HT2A	CG1056	FBgn0087012
FBgn0261929	0	83	64	0	0	0	0	0	-0.534146	1.87859	1.32628	-0.534146	-0.534146	-0.534146	-0.534146	-0.534146	5-HT2B	CG42796	FBgn0261929
FBgn0004573	0	79	52	0	0	105	171	172	-0.996974	0.0912602	-0.280668	-0.996974	-0.996974	0.449413	1.35857	1.37235	5-HT7	CG12073	FBgn0004573
FBgn0267514	39	0	0	0	0	0	0	104	0.565141	-0.478196	-0.478196	-0.478196	-0.478196	-0.478196	-0.478196	2.30404	5.8SrRNA-Psi:CR45854	CR45854	FBgn0267514
FBgn0267523	137	68	0	0	0	0	0	385	0.467547	-0.0425043	-0.545164	-0.545164	-0.545164	-0.545164	-0.545164	2.30078	5.8SrRNA-Psi:CR45863	CR45863	FBgn0267523
FBgn0259178	493	361	297	255	491	584	621	636	0.174574	-0.72033	-1.15422	-1.43897	0.161015	0.791516	1.04236	1.14405	5PtaseI	CG42283	FBgn0259178
FBgn0041707	80	378	299	204	229	697	986	667	-1.17242	-0.20861	-0.464117	-0.771372	-0.690516	0.82312	1.75782	0.726092	7B2	CG1168	FBgn0041707
FBgn0052208	0	56	0	0	0	666	388	0	-0.551405	-0.328856	-0.551405	-0.551405	-0.551405	2.09534	0.990542	-0.551405	825-Oak	CG32208	FBgn0052208
FBgn0000008	3137	1142	1511	5731	8647	1677	830	310	0.0911995	-0.598305	-0.470773	0.987729	1.99555	-0.4134	-0.706138	-0.885858	a	CG6741	FBgn0000008
FBgn0028965	2283	1633	1699	1679	1455	1199	963	1180	1.87558	0.295633	0.456059	0.407445	-0.13703	-0.759288	-1.33293	-0.805471	A16	CG9933	FBgn0028965
FBgn0023130	539	407	291	421	339	469	453	520	1.28806	-0.270006	-1.63921	-0.104756	-1.07265	0.461813	0.272957	1.06379	a6	CG3771	FBgn0023130
FBgn0019643	190	1603	973	2521	821	1322	2017	7494	-0.84205	-0.224805	-0.50001	0.176207	-0.566408	-0.347555	-0.0439563	2.34858	AANAT1	CG3318	FBgn0019643
FBgn0031791	0	44	37	70	45	621	878	1262	-0.757562	-0.667382	-0.681729	-0.614094	-0.665333	0.515204	1.04194	1.82896	AANATL2	CG9486	FBgn0031791
FBgn0032839	0	0	0	0	0	0	0	246	-0.353553	-0.353553	-0.353553	-0.353553	-0.353553	-0.353553	-0.353553	2.47487	AANATL3	CG10659	FBgn0032839
FBgn0034429	0	84	0	0	0	0	0	0	-0.353553	2.47487	-0.353553	-0.353553	-0.353553	-0.353553	-0.353553	-0.353553	AANATL4	CG18607	FBgn0034429
FBgn0040376	0	34	60	0	0	63	0	0	-0.691146	0.506254	1.42191	-0.691146	-0.691146	1.52757	-0.691146	-0.691146	AANATL7	CG13759	FBgn0040376
FBgn0027780	336	211	201	130	273	175	353	172	1.2936	-0.25192	-0.375561	-1.25342	0.514658	-0.697029	1.50379	-0.734121	Aasdh	CG13401	FBgn0027780
FBgn0031851	1384	1372	1455	1697	1203	591	465	399	0.618675	0.594975	0.758902	1.23686	0.261197	-0.947516	-1.19637	-1.32672	Aatf	CG11188	FBgn0031851
FBgn0023129	287	2369	1411	1279	1330	2383	4746	7432	-1.01416	-0.122346	-0.532698	-0.589239	-0.567394	-0.116349	0.895826	2.04636	aay	CG3705	FBgn0023129
FBgn0264442	29029	3310	2353	1314	641	441	558	551	2.46131	-0.148628	-0.245744	-0.35118	-0.419476	-0.439771	-0.427898	-0.428609	ab	CG43860	FBgn0264442
FBgn0031170	355	186	516	464	234	839	2018	2353	-0.613425	-0.814479	-0.421887	-0.48375	-0.757375	-0.0376234	1.365	1.76354	ABCA	CG1718	FBgn0031170
FBgn0035244	1066	773	1030	1261	1793	7163	10161	7369	-0.733103	-0.8109	-0.742662	-0.681326	-0.540069	0.885777	1.68181	0.940475	ABCB7	CG7955	FBgn0035244
FBgn0039890	369	849	386	311	318	235	111	295	0.0451875	2.2698	0.123976	-0.22362	-0.191178	-0.575851	-1.15054	-0.297774	ABCD	CG2316	FBgn0039890
FBgn0000014	0	684	690	313	97	179	156	124	-1.0552	1.51905	1.54163	0.122785	-0.690137	-0.381528	-0.468089	-0.588522	abd-A	CG10325	FBgn0000014
FBgn0000015	206	350	278	85	67	74	0	0	0.563814	1.66843	1.11612	-0.36437	-0.502447	-0.44875	-1.0164	-1.0164	Abd-B	CG11648	FBgn0000015
FBgn0020510	1922	1677	1606	2323	1322	1184	1216	1304	0.885749	0.270558	0.0922786	1.89265	-0.62084	-0.967355	-0.887004	-0.666038	Abi	CG9749	FBgn0020510
FBgn0000017	4457	4876	5688	6050	2034	2131	2034	1604	0.460039	0.687412	1.12805	1.32449	-0.854822	-0.802185	-0.854822	-1.08817	Abl	CG4032	FBgn0000017
FBgn0000018	278	258	301	279	290	178	165	148	0.653604	0.333798	1.02138	0.669595	0.845488	-0.945428	-1.1533	-1.42514	abo	CG6093	FBgn0000018
FBgn0036372	3160	2067	1526	966	1154	758	822	1483	2.08206	0.717736	0.0424401	-0.656573	-0.421904	-0.916206	-0.836319	-0.0112341	Abp1	CG10083	FBgn0036372
FBgn0015331	1158	965	1316	1465	729	648	377	596	0.657746	0.152492	1.07137	1.46144	-0.465331	-0.67738	-1.38683	-0.813511	abs	CG14637	FBgn0015331
FBgn0000022	168	145	44	0	0	0	0	0	1.73849	1.4144	-0.00880695	-0.628816	-0.628816	-0.628816	-0.628816	-0.628816	ac	CG3796	FBgn0000022
FBgn0022710	602	420	292	190	808	572	1291	2154	-0.291847	-0.572699	-0.770221	-0.927622	0.0260405	-0.338141	0.771379	2.10311	Ac13E	CG9210	FBgn0022710
FBgn0023416	222	297	247	71	64	319	492	168	-0.0926252	0.441751	0.0855002	-1.1685	-1.21838	0.598501	1.83113	-0.477376	Ac3	CG1506	FBgn0023416
FBgn0004852	81	106	416	723	469	5647	10306	5839	-0.745388	-0.738889	-0.658303	-0.578497	-0.644525	0.70152	1.91265	0.751432	Ac76E	CG7978	FBgn0004852
FBgn0024150	50	101	79	0	137	182	367	341	-0.803908	-0.421184	-0.586281	-1.17913	-0.151026	0.186672	1.57498	1.37987	Ac78C	CG10564	FBgn0024150
FBgn0031992	890	1902	2482	6350	6709	3460	2489	1202	-1.03647	-0.579527	-0.317645	1.42884	1.59093	0.123942	-0.314484	-0.895591	Acbp1	CG8498	FBgn0031992
FBgn0010387	0	189	115	182	1359	741	3411	17061	-0.493544	-0.46118	-0.473852	-0.462379	-0.260835	-0.366658	0.0905408	2.42791	Acbp2	CG8627	FBgn0010387
FBgn0035926	0	0	0	0	0	166	97	7473	-0.367743	-0.367743	-0.367743	-0.367743	-0.367743	-0.304614	-0.330854	2.47418	Acbp5	CG5804	FBgn0035926
FBgn0035743	0	0	0	0	0	0	0	153	-0.353553	-0.353553	-0.353553	-0.353553	-0.353553	-0.353553	-0.353553	2.47487	Acbp6	CG15829	FBgn0035743
FBgn0033246	3543	1509	2606	3701	5153	5630	8085	11086	-0.518265	-1.16852	-0.817819	-0.467753	-0.0035566	0.148938	0.933788	1.89319	ACC	CG11198	FBgn0033246
FBgn0012034	356	465	325	225	164	1707	3873	8115	-0.550669	-0.511888	-0.561698	-0.597277	-0.61898	-0.070001	0.700633	2.20988	AcCoAS	CG9390	FBgn0012034
FBgn0000024	41	844	569	245	402	1365	2349	1984	-1.1079	-0.155263	-0.481509	-0.865885	-0.679629	0.462824	1.63019	1.19717	Ace	CG17907	FBgn0000024
FBgn0016122	149	1385	2445	2968	9736	1421	1205	1137	-0.795794	-0.38711	-0.0366196	0.136311	2.37416	-0.375206	-0.446627	-0.469111	Acer	CG10593	FBgn0016122
FBgn0027620	3551	1603	1047	519	563	374	605	404	2.28795	0.481881	-0.0336088	-0.523139	-0.482345	-0.657574	-0.443405	-0.62976	Acf	CG1966	FBgn0027620
FBgn0033749	399	449	729	428	180	207	145	135	0.315308	0.557853	1.9161	0.455984	-0.747037	-0.616063	-0.916819	-0.965327	achi	CG8819	FBgn0033749
FBgn0033936	262	65	68	51	2024	2598	51974	1336	-0.389134	-0.400031	-0.399865	-0.400805	-0.291675	-0.259925	2.47116	-0.329729	Achl	CG17386	FBgn0033936
FBgn0000028	48	323	285	184	37	83	0	0	-0.562294	1.58536	1.28859	0.499817	-0.6482	-0.288957	-0.937157	-0.937157	acj6	CG9151	FBgn0000028
FBgn0028484	2449	1548	2522	2425	1743	1914	2489	2671	0.545077	-1.6007	0.71893	0.48792	-1.1363	-0.729052	0.640339	1.07378	Ack	CG14992	FBgn0028484
FBgn0263998	6237	3423	3251	2397	1538	734	842	735	2.02466	0.54188	0.451248	0.00125146	-0.45138	-0.875031	-0.818122	-0.874504	Ack-like	CG43741	FBgn0263998
FBgn0263198	9537	5074	5275	6270	4911	4482	3851	2956	2.14596	-0.111534	-0.00986357	0.493432	-0.193984	-0.410982	-0.730157	-1.18287	Acn	CG10473	FBgn0263198
FBgn0027572	1910	1778	1159	831	2084	1609	1625	2585	0.393155	0.148793	-0.99712	-1.60432	0.71527	-0.164065	-0.134446	1.64274	ACOX1	CG5009	FBgn0027572
FBgn0034629	201	74	69	0	148	120	89	483	0.358586	-0.500667	-0.534495	-1.00133	0	-0.189441	-0.39918	2.26653	Acox57D-d	CG9709	FBgn0034629
FBgn0034628	430	388	454	277	897	794	697	1176	-0.684031	-0.821409	-0.605529	-1.18448	0.843488	0.506583	0.189304	1.75607	Acox57D-p	CG9707	FBgn0034628
FBgn0014454	142	0	0	0	2169	2346	637	1794	-0.715315	-0.85184	-0.85184	-0.85184	1.23353	1.40371	-0.2394	0.872992	Acp1	CG7216	FBgn0014454
FBgn0023415	36	45	83	104	169	231	0	0	-0.578642	-0.469004	-0.00609097	0.24973	1.04155	1.79683	-1.01719	-1.01719	Acp32CD	CG4605	FBgn0023415
FBgn0011559	0	37	58	0	0	0	0	0	-0.523284	1.10716	2.03255	-0.523284	-0.523284	-0.523284	-0.523284	-0.523284	Acp36DE	CG7157	FBgn0011559
FBgn0034153	0	0	0	0	0	81	0	0	-0.353553	-0.353553	-0.353553	-0.353553	-0.353553	2.47487	-0.353553	-0.353553	Acp53C14b	CG15616	FBgn0034153
FBgn0020765	0	0	0	0	1850	32661	3476	260	-0.42176	-0.42176	-0.42176	-0.42176	-0.258557	2.45953	-0.115114	-0.398823	Acp65Aa	CG10297	FBgn0020765
FBgn0000032	554	718	869	1076	1274	640	603	820	-1.06441	-0.406303	0.19964	1.03031	1.82485	-0.719308	-0.867784	0.00300965	Acph-1	CG7899	FBgn0000032
FBgn0263120	2903	2091	2585	4443	7153	31579	46687	24694	-0.729187	-0.777076	-0.747942	-0.638362	-0.478534	0.962044	1.85307	0.555986	Acsl	CG8732	FBgn0263120
FBgn0000043	35674	21701	17128	7730	8715	4784	6107	12719	2.05733	0.71113	0.270555	-0.634875	-0.539977	-0.918701	-0.791239	-0.154221	Act42A	CG12051	FBgn0000043
FBgn0000044	355	27751	26861	12228	9876	54613	35427	41346	-1.43227	0.0943924	0.0447965	-0.770638	-0.901705	1.5913	0.522143	0.851983	Act57B	CG10067	FBgn0000044
FBgn0000042	162817	101371	54259	46805	43193	28126	57640	93190	2.03904	0.63745	-0.437183	-0.60721	-0.6896	-1.03328	-0.360062	0.45084	Act5C	CG4027	FBgn0000042
FBgn0000045	1302	2127	4870	16263	400591	372660	81005	121258	-0.739502	-0.734571	-0.718174	-0.650068	1.64738	1.48041	-0.263051	-0.0224258	Act79B	CG7478	FBgn0000045
FBgn0000046	480	8648	18087	14303	21190	44893	13342	10050	-1.21129	-0.588807	0.130538	-0.15784	0.367017	2.17342	-0.231078	-0.481961	Act87E	CG18290	FBgn0000046
FBgn0000047	898	11041	151538	898556	851514	5551247	7615864	6108466	-0.828088	-0.824916	-0.780975	-0.547343	-0.562056	0.907798	1.55351	1.08207	Act88F	CG5178	FBgn0000047
FBgn0024913	0	250	158	0	0	66	88	0	-0.758259	1.94017	0.947149	-0.758259	-0.758259	-0.0458733	0.191589	-0.758259	Actbeta	CG11062	FBgn0024913
FBgn0000667	7529	4424	14560	30245	73961	401642	457150	298008	-0.798206	-0.814362	-0.761623	-0.680013	-0.452556	1.25239	1.5412	0.713174	Actn	CG4376	FBgn0000667
FBgn0015008	0	374	471	209	45	0	0	0	-0.717724	1.23626	1.74304	0.374209	-0.482618	-0.717724	-0.717724	-0.717724	Actn3	CG8953	FBgn0015008
FBgn0040510	0	356	761	496	64	112	0	0	-0.784737	0.464526	1.88574	0.955809	-0.56015	-0.39171	-0.784737	-0.784737	ACXA	CG17176	FBgn0040510
FBgn0040509	0	95	160	81	0	0	0	0	-0.675339	0.852214	1.89738	0.627101	-0.675339	-0.675339	-0.675339	-0.675339	ACXB	CG17174	FBgn0040509
FBgn0040508	0	646	1395	937	86	165	0	0	-0.760335	0.456577	1.86752	1.00475	-0.598331	-0.449513	-0.760335	-0.760335	ACXC	CG5983	FBgn0040508
FBgn0040507	0	133	86	79	0	116	154	355	-1.02882	0.157166	-0.261943	-0.324364	-1.02882	0.00557326	0.344427	2.13679	ACXD	CG5712	FBgn0040507
FBgn0040506	0	57	84	0	0	0	0	0	-0.527325	1.17807	1.98588	-0.527325	-0.527325	-0.527325	-0.527325	-0.527325	ACXE	CG17178	FBgn0040506
FBgn0025115	0	153	243	229	37	110	0	0	-0.939382	0.550001	1.42611	1.28983	-0.579205	0.131416	-0.939382	-0.939382	Acyp	CG16870	FBgn0025115
FBgn0038363	450	573	699	636	1987	2682	3123	3878	-0.965494	-0.874388	-0.781061	-0.827725	0.172952	0.687734	1.01438	1.5736	Acyp2	CG18505	FBgn0038363
FBgn0037661	67	210	202	82	117	135	170	63	-1.08568	1.34965	1.2134	-0.830224	-0.234166	0.0723785	0.668437	-1.1538	Ada	CG11994	FBgn0037661
FBgn0051865	0	0	0	0	48	0	0	68	-0.529667	-0.529667	-0.529667	-0.529667	1.22371	-0.529667	-0.529667	1.95429	Ada1-1	CG31865	FBgn0051865
FBgn0051866	262	110	95	66	106	90	69	126	2.34262	-0.0879482	-0.327807	-0.791533	-0.15191	-0.40776	-0.743562	0.167901	Ada1-2	CG31866	FBgn0051866
FBgn0263738	567	391	416	219	386	181	233	232	1.79529	0.472542	0.660432	-0.820138	0.434964	-1.10573	-0.71492	-0.722436	Ada2a	CG43663	FBgn0263738
FBgn0037555	1744	789	917	891	657	574	412	493	2.23012	-0.0492268	0.256278	0.194222	-0.364278	-0.562379	-0.949033	-0.755706	Ada2b	CG9638	FBgn0037555
FBgn0030891	1728	786	555	698	548	540	566	658	2.41498	0.0651686	-0.511059	-0.154347	-0.52852	-0.548476	-0.483619	-0.254126	Ada3	CG7098	FBgn0030891
FBgn0038341	1523	846	1348	2189	1186	2305	5214	4667	-0.540013	-0.952293	-0.646585	-0.134432	-0.745239	-0.0637907	1.70773	1.37462	AdamTS-A	CG14869	FBgn0286071
FBgn0029791	7434	1706	1123	543	621	96	69	643	2.41539	0.0722516	-0.166235	-0.403494	-0.371587	-0.586347	-0.597392	-0.362587	AdamTS-B	CG4096	FBgn0029791
FBgn0026086	1027	1122	1122	1467	1928	1681	2438	3162	-0.960392	-0.833033	-0.833033	-0.370516	0.247513	-0.0836217	0.931234	1.90185	Adar	CG12598	FBgn0026086
FBgn0028658	74	71	72	75	58	67	0	54	0.605701	0.485562	0.525609	0.645748	-0.0350406	0.325377	-2.35773	-0.195226	Adat1	CG16889	FBgn0028658
FBgn0035039	558	305	334	721	3717	4635	5146	6011	-0.87022	-0.974054	-0.962152	-0.803324	0.426261	0.803016	1.01273	1.36774	Adck1	CG3608	FBgn0035039
FBgn0036142	101	508	1175	887	390	717	507	520	-1.53325	-0.284248	1.76264	0.878828	-0.646366	0.357132	-0.287317	-0.247422	Adck5	CG7616	FBgn0036142
FBgn0026573	3030	1572	1480	967	854	609	594	451	2.16797	0.44576	0.337089	-0.268873	-0.40235	-0.691748	-0.709466	-0.878379	ADD1	CG8290	FBgn0026573
FBgn0000054	2380	2248	1988	1928	1450	655	945	1351	1.22893	1.01601	0.596622	0.49984	-0.271192	-1.55356	-1.08578	-0.430882	Adf1	CG15845	FBgn0284249
FBgn0036752	0	2044	2366	649	140	148	168	790	-0.856875	1.36543	1.71552	-0.151261	-0.704663	-0.695965	-0.67422	0.00203856	Adgf-A	CG5992	FBgn0036752
FBgn0043025	0	608	1174	762	119	264	0	0	-0.835762	0.553082	1.84599	0.904861	-0.563932	-0.232711	-0.835762	-0.835762	Adgf-A2	CG32178	FBgn0043025
FBgn0036751	0	355	735	484	70	176	0	0	-0.832831	0.466752	1.85785	0.938995	-0.576576	-0.188531	-0.832831	-0.832831	Adgf-B	CG5998	FBgn0036751
FBgn0038173	0	0	0	0	0	0	64	65	-0.54004	-0.54004	-0.54004	-0.54004	-0.54004	-0.54004	1.60337	1.63687	Adgf-C	CG9345	FBgn0038173
FBgn0038172	47	399	337	289	201	217	1485	1178	-0.910299	-0.231612	-0.351153	-0.443701	-0.613373	-0.582524	1.86229	1.27037	Adgf-D	CG9621	FBgn0038172
FBgn0033952	0	566	1293	995	173	417	0	108	-0.922764	0.253552	1.76448	1.14514	-0.563219	-0.0561141	-0.922764	-0.698308	Adgf-E	CG10143	FBgn0033952
FBgn0000055	0	0	0	0	0	184	196	329	-0.68353	-0.68353	-0.68353	-0.68353	-0.68353	0.735591	0.828142	1.85392	Adh	CG3481	FBgn0000055
FBgn0052068	233	517	453	371	1550	1373	1355	1337	-1.21082	-0.694202	-0.810622	-0.959786	1.1849	0.862921	0.830177	0.797434	Adi1	CG32068	FBgn0052068
FBgn0038984	1917	2541	3261	3624	4850	6901	7664	9190	-1.16569	-0.929255	-0.656446	-0.518905	-0.0543723	0.722754	1.01186	1.59006	AdipoR	CG5315	FBgn0038984
FBgn0037995	0	544	1025	657	129	200	0	0	-0.837135	0.588779	1.84956	0.884971	-0.499004	-0.312902	-0.837135	-0.837135	Adk1	CG3809	FBgn0037995
FBgn0036337	1149	984	881	2171	5236	10729	11570	7004	-0.865929	-0.903367	-0.926736	-0.634047	0.061374	1.30769	1.4985	0.462517	Adk2	CG11255	FBgn0036337
FBgn0026602	8350	8144	5429	20165	7646	6741	6883	5940	-0.0656338	-0.108934	-0.679618	2.41784	-0.213612	-0.40384	-0.373992	-0.572207	Adk3	CG1851	FBgn0026602
FBgn0039747	0	36	40	0	0	0	91	54	-0.817778	0.247924	0.366335	-0.817778	-0.817778	-0.817778	1.87608	0.780775	AdoR	CG9753	FBgn0039747
FBgn0000057	701	998	1527	1956	1539	2006	2202	1684	-1.7096	-1.12972	-0.0968893	0.740703	-0.0734602	0.838324	1.221	0.209642	adp	CG5124	FBgn0000057
FBgn0033983	45	381	625	431	1558	235	2204	5138	-0.751545	-0.554591	-0.411565	-0.525283	0.135332	-0.640172	0.513999	2.23382	ADPS	CG10253	FBgn0033983
FBgn0038467	1465	1606	1340	4388	3147	1380	1273	1312	-0.454979	-0.332522	-0.56354	2.08361	1.00582	-0.5288	-0.621728	-0.587857	AdSL	CG3590	FBgn0038467
FBgn0027493	6140	2332	2117	4932	4573	5647	48399	24480	-0.380532	-0.614725	-0.627947	-0.454824	-0.476903	-0.410852	2.2184	0.747381	AdSS	CG17273	FBgn0027493
FBgn0037679	426	336	400	301	525	257	326	348	0.730905	-0.345274	0.420009	-0.763788	1.9147	-1.28992	-0.46485	-0.201784	Aduk	CG8866	FBgn0037679
FBgn0036043	2980	826	1367	1275	94	508	1718	1263	1.98505	-0.492058	0.130094	0.0242938	-1.33386	-0.85776	0.533746	0.0104938	Ae2	CG8177	FBgn0036043
FBgn0005694	1538	1261	1288	1940	2714	2418	1961	1801	-0.636284	-1.17507	-1.12255	0.145638	1.65113	1.07539	0.186484	-0.124728	Aef1	CG5683	FBgn0005694
FBgn0026309	1436	1211	1191	1496	426	197	149	168	1.08294	0.709081	0.675849	1.18263	-0.595263	-0.975765	-1.05552	-1.02395	aft	CG5032	FBgn0026309
FBgn0038223	922	817	1393	1101	489	647	763	778	0.208398	-0.167255	1.89347	0.848797	-1.34072	-0.775455	-0.360448	-0.306783	Afti	CG8538	FBgn0038223
FBgn0015010	274	882	237	143	64	54	1116	33959	-0.36361	-0.312401	-0.366727	-0.374644	-0.381297	-0.38214	-0.292693	2.47351	Ag5r	CG9538	FBgn0015010
FBgn0020508	55	107	0	0	47	0	0	664	-0.237906	-0.00934041	-0.479658	-0.479658	-0.27307	-0.479658	-0.479658	2.43895	Ag5r2	CG9540	FBgn0020508
FBgn0053138	2994	1386	1780	6595	6562	13807	32666	57777	-0.623945	-0.704519	-0.684776	-0.443504	-0.445157	-0.0821215	0.862874	2.12115	AGBE	CG33138	FBgn0053138
FBgn0029813	34	0	0	155	144	158	86	0	-0.526814	-0.996629	-0.996629	1.14517	0.993174	1.18663	0.191726	-0.996629	AgmNAT	CG15766	FBgn0029813
FBgn0041171	5937	4217	5301	5927	3371	2878	2590	2765	1.27116	0.0657042	0.825419	1.26415	-0.52721	-0.872726	-1.07457	-0.951922	ago	CG15010	FBgn0041171
FBgn0262739	13716	9432	7039	10387	8159	8651	7137	5980	2.01781	0.254882	-0.729872	0.647878	-0.268976	-0.066511	-0.689544	-1.16567	AGO1	CG6671	FBgn0262739
FBgn0087035	7109	9670	11021	9669	12369	9852	8693	8023	-1.47224	0.0719011	0.886478	0.0712981	1.69925	0.181637	-0.517175	-0.921148	AGO2	CG7439	FBgn0087035
FBgn0250816	0	71	0	0	0	0	0	0	-0.353553	2.47487	-0.353553	-0.353553	-0.353553	-0.353553	-0.353553	-0.353553	AGO3	CG40300	FBgn0250816
FBgn0030421	0	238	180	75	72	137	159	146	-1.69812	1.51262	0.730173	-0.686329	-0.726801	0.150082	0.446873	0.271496	Agpat1	CG3812	FBgn0030421
FBgn0026718	33	533	853	542	97	208	70	334	-1.04073	0.689493	1.79683	0.720637	-0.81926	-0.435151	-0.912692	0.000865111	Agpat2	CG17608	FBgn0026718
FBgn0036623	2100	2298	1890	2163	8569	6988	5325	3948	-0.80636	-0.728861	-0.888557	-0.781701	1.72569	1.10687	0.455948	-0.0830286	Agpat3	CG4729	FBgn0036623
FBgn0036622	71	69	69	118	644	338	1562	2786	-0.647371	-0.649407	-0.649407	-0.59954	-0.064241	-0.375651	0.869989	2.11563	Agpat4	CG4753	FBgn0036622
FBgn0024912	139	57	34	0	59	73	54	0	1.95801	0.112529	-0.405105	-1.1703	0.157541	0.472622	0.0450117	-1.1703	agt	CG1303	FBgn0024912
FBgn0014455	6749	5861	6280	11278	12426	5096	4174	2819	-0.0257935	-0.29097	-0.165848	1.32667	1.66949	-0.519417	-0.794747	-1.19938	Ahcy	CG11654	FBgn0014455
FBgn0035371	2850	2854	2856	2221	1499	1654	2446	4706	0.215922	0.219953	0.221968	-0.417986	-1.14562	-0.98941	-0.19123	2.0864	AhcyL1	CG9977	FBgn0035371
FBgn0015011	148	276	126	69	35	211	2193	1715	-0.527286	-0.376843	-0.553144	-0.620138	-0.6601	-0.45324	1.87628	1.31447	AhcyL2	CG8956	FBgn0015011
FBgn0031392	1947	2225	4150	7215	9962	5109	3437	1139	-0.825331	-0.73172	-0.0835096	0.948575	1.87358	0.239417	-0.3236	-1.09741	AIF	CG7263	FBgn0031392
FBgn0033351	2030	1411	1251	3520	3838	3835	3554	2467	-0.652883	-1.22349	-1.37099	0.720637	1.01378	1.01101	0.751979	-0.250045	AIMP1	CG8235	FBgn0033351
FBgn0036515	2718	2128	2506	8413	4193	4778	4027	3078	-0.627214	-0.920414	-0.732567	2.20292	0.105788	0.396504	0.0232946	-0.448311	AIMP2	CG12304	FBgn0036515
FBgn0050185	877	747	1089	2634	2946	1581	1745	1214	-0.900644	-1.06167	-0.638053	1.27564	1.6621	-0.0286435	0.174493	-0.483223	AIMP3	CG30185	FBgn0050185
FBgn0022709	314	558	866	708	770	50928	89753	119024	-0.677114	-0.672039	-0.665632	-0.668919	-0.667629	0.375736	1.18336	1.79224	Ak1	CG17146	FBgn0022709
FBgn0022708	0	0	0	54	0	242	266	102	-0.742256	-0.742256	-0.742256	-0.259342	-0.742256	1.42191	1.63654	0.169914	Ak2	CG3140	FBgn0283494
FBgn0042094	1945	2305	2286	1692	783	723	1032	2505	0.396477	0.89532	0.868992	0.0459005	-1.21368	-1.29682	-0.868646	1.17246	Ak3	CG6612	FBgn0042094
FBgn0033754	147	228	192	253	242	122	0	0	-0.00981376	0.785101	0.431806	1.03045	0.922494	-0.255158	-1.45244	-1.45244	Ak6	CG8816	FBgn0033754
FBgn0027932	42809	43933	25012	56487	49725	4723	6627	7945	0.620511	0.673544	-0.219191	1.26587	0.946823	-1.17647	-1.08664	-1.02445	Akap200	CG13388	FBgn0027932
FBgn0004552	39	115	168	107	90	497	873	3500	-0.53935	-0.47476	-0.429717	-0.481559	-0.496007	-0.150109	0.169443	2.40206	Akh	CG1171	FBgn0004552
FBgn0025595	0	158	192	139	39	76	85	105	-1.57233	0.930724	1.46936	0.629724	-0.954487	-0.368329	-0.22575	0.0910921	AkhR	CG11325	FBgn0025595
FBgn0082598	23828	11532	6266	8527	4505	3638	2742	4246	2.25118	0.484433	-0.272211	0.0526605	-0.52524	-0.649814	-0.778556	-0.562454	akirin	CG8580	FBgn0082598
FBgn0086254	2688	3237	2541	2544	15723	4428	7993	21622	-0.677842	-0.602036	-0.69814	-0.697726	1.12205	-0.43758	0.0546803	1.93659	Akr1B	CG6084	FBgn0086254
FBgn0010379	4130	4219	3497	6903	3488	5795	3517	2120	-0.0525856	0.00693896	-0.475946	1.80204	-0.481965	1.06099	-0.46257	-1.39691	Akt1	CG4006	FBgn0010379
FBgn0000061	3044	346	337	198	228	0	0	0	2.44999	-0.16799	-0.176723	-0.3116	-0.28249	-0.503727	-0.503727	-0.503727	al	CG3935	FBgn0000061
FBgn0030122	1585	786	663	870	538	287	298	227	2.08453	0.290251	0.0140353	0.478886	-0.266672	-0.830331	-0.805629	-0.96507	Aladin	CG16892	FBgn0030122
FBgn0027094	11971	4906	6561	16788	14360	2300	2109	3103	0.725134	-0.492109	-0.206966	1.55506	1.13674	-0.941102	-0.974009	-0.802751	AlaRS	CG13391	FBgn0027094
FBgn0028962	761	751	1149	2580	7730	4191	3958	2303	-0.920059	-0.924305	-0.755313	-0.147708	2.03899	0.536325	0.437393	-0.265323	AlaRS-m	CG4633	FBgn0028962
FBgn0020764	2636	1126	2190	6268	13125	90370	79670	38049	-0.725303	-0.766564	-0.73749	-0.626058	-0.438688	1.67206	1.37968	0.242369	Alas	CG3017	FBgn0020764
FBgn0260972	1440	1483	1979	3909	3433	5703	5953	7450	-1.09505	-1.07605	-0.856931	-0.0043073	-0.214592	0.788235	0.898679	1.56001	alc	CG8057	FBgn0260972
FBgn0000064	7984	6868	27650	144439	186620	752635	861762	850389	-0.882201	-0.88504	-0.832176	-0.535092	-0.427793	1.01202	1.28961	1.26068	Ald1	CG6058	FBgn0000064
FBgn0039425	0	673	1634	1159	162	395	0	68	-0.845438	0.267209	1.856	1.0707	-0.577609	-0.192399	-0.845438	-0.733016	Ald2	CG5432	FBgn0039425
FBgn0012036	1202	4296	8175	20958	25372	34088	38523	53760	-1.20232	-1.03395	-0.822871	-0.127266	0.112928	0.587221	0.828558	1.6577	Aldh	CG3752	FBgn0012036
FBgn0010548	6181	3861	2987	2594	7974	4150	5510	5013	0.788399	-0.520662	-1.01382	-1.23557	1.8001	-0.357594	0.409787	0.129354	Aldh-III	CG11140	FBgn0010548
FBgn0036857	331	1139	828	869	491	504	799	1422	-1.29461	0.945917	0.0835346	0.197225	-0.850944	-0.814896	0.00311955	1.73066	Aldh7A1	CG9629	FBgn0036857
FBgn0086378	417	517	193	188	266	94	62	125	1.15076	1.77532	-0.248263	-0.279491	0.207667	-0.86658	-1.06644	-0.672965	Alg-2	CG40410	FBgn0086378
FBgn0038552	1880	766	583	722	667	704	902	1456	1.9984	-0.421402	-0.818909	-0.516977	-0.636447	-0.556076	-0.125986	1.0774	Alg1	CG18012	FBgn0038552
FBgn0052076	1697	898	922	710	676	264	277	253	2.02805	0.382753	0.432174	-0.00437579	-0.0743885	-0.922777	-0.896008	-0.945428	Alg10	CG32076	FBgn0052076
FBgn0037108	970	1051	983	745	1584	1057	1476	1578	-0.659499	-0.405725	-0.61877	-1.36443	1.26417	-0.386927	0.925805	1.24537	Alg11	CG11306	FBgn0037108
FBgn0037743	618	307	1116	1891	1313	1294	1332	726	-0.910998	-1.53146	0.0825459	1.62872	0.475574	0.437668	0.513481	-0.69553	Alg12	CG8412	FBgn0037743
FBgn0030645	346	177	203	442	544	572	447	721	-0.460937	-1.37203	-1.23186	0.0566063	0.606496	0.757447	0.0835617	1.56072	Alg14	CG6308	FBgn0030645
FBgn0035401	788	534	459	456	404	493	575	1216	0.639674	-0.302906	-0.581227	-0.59236	-0.785329	-0.455055	-0.150757	2.22796	Alg2	CG1291	FBgn0035401
FBgn0011297	395	540	625	1056	5916	1670	1468	801	-0.64073	-0.560906	-0.514112	-0.27684	2.39866	0.061176	-0.050028	-0.417221	Alg3	CG4084	FBgn0011297
FBgn0032477	282	330	351	280	438	444	529	621	-1.04609	-0.65188	-0.479414	-1.06251	0.235088	0.284364	0.98244	1.73801	Alg7	CG5287	FBgn0032477
FBgn0039293	215	464	364	316	338	98	102	127	-0.276533	1.53548	0.807767	0.458462	0.61856	-1.12796	-1.09885	-0.916924	Alg9	CG11851	FBgn0039293
FBgn0261238	9480	4214	5604	5820	5678	1546	2127	1604	1.82426	-0.108308	0.401808	0.481078	0.428965	-1.08744	-0.874215	-1.06615	Alh	CG1070	FBgn0261238
FBgn0013746	1331	2083	1819	1321	1994	1143	1182	777	-0.272184	1.362	0.7883	-0.293915	1.1686	-0.680731	-0.595979	-1.47609	alien	CG9556	FBgn0013746
FBgn0086346	6680	3151	3744	4585	4450	3099	3513	5320	1.92903	-0.952778	-0.468529	0.218239	0.107997	-0.995242	-0.657166	0.818446	ALiX	CG12876	FBgn0086346
FBgn0040505	234	2085	2241	3449	1270	2398	4131	4212	-1.64026	-0.301878	-0.18908	0.684377	-0.891172	-0.0755598	1.1775	1.23607	Alk	CG8250	FBgn0040505
FBgn0065035	66	119	60	62	41	0	0	0	0.532362	1.78637	0.390399	0.43772	-0.0591513	-1.02923	-1.02923	-1.02923	AlkB	CG33250	FBgn0065035
FBgn0037083	0	196	0	0	0	0	0	0	-0.353553	2.47487	-0.353553	-0.353553	-0.353553	-0.353553	-0.353553	-0.353553	Alp1	CG5656	FBgn0283479
FBgn0030661	139	282	576	454	101	181	97	0	-0.456566	0.270887	1.76649	1.14587	-0.649875	-0.242908	-0.670223	-1.16367	Alp11	CG8105	FBgn0030661
FBgn0032779	237	282	411	1022	1079	818	1129	1421	-1.27797	-1.1758	-0.882913	0.504319	0.633734	0.0411515	0.747255	1.41022	Alp12	CG16771	FBgn0032779
FBgn0034711	0	0	0	0	0	0	125	1374	-0.389181	-0.389181	-0.389181	-0.389181	-0.389181	-0.389181	-0.129554	2.46464	Alp2	CG3290	FBgn0283480
FBgn0016123	58	40	51	0	0	175	6060	2335	-0.477339	-0.485665	-0.480577	-0.504169	-0.504169	-0.423215	2.29915	0.575987	Alp4	CG1462	FBgn0016123
FBgn0038845	0	0	0	0	0	0	0	257	-0.353553	-0.353553	-0.353553	-0.353553	-0.353553	-0.353553	-0.353553	2.47487	Alp5	CG10827	FBgn0038845
FBgn0086361	3450	2937	3413	4490	4560	6057	5452	5139	-0.899194	-1.36644	-0.932894	0.0480451	0.111802	1.47528	0.924241	0.639159	alph	CG1906	FBgn0086361
FBgn0010215	958	2019	934	717	556	273	172	309	0.362339	2.14422	0.322032	-0.0424058	-0.312795	-0.788076	-0.957699	-0.727616	alpha-Cat	CG17947	FBgn0010215
FBgn0029105	45	131	120	57	0	111	137	87	-0.848971	0.931798	0.704025	-0.600492	-1.78077	0.517665	1.05604	0.0207066	alpha-Catr	CG2987	FBgn0029105
FBgn0015568	0	457	302	418	405	316	349	757	-1.79742	0.390119	-0.351825	0.203436	0.141209	-0.284811	-0.126848	1.82614	alpha-Est1	CG1031	FBgn0015568
FBgn0015569	221	128	274	182	543	762	513	312	-0.669167	-1.09578	-0.426042	-0.84807	0.807931	1.81254	0.670313	-0.251726	alpha-Est10	CG1131	FBgn0015569
FBgn0015570	34	0	333	428	170	1119	409	317	-0.906668	-1.00384	-0.0521566	0.219344	-0.517994	2.19415	0.165044	-0.097883	alpha-Est2	CG2505	FBgn0015570
FBgn0015571	300	1265	2295	1755	2630	4066	4615	4631	-1.48742	-0.88801	-0.248227	-0.583647	-0.0401418	0.851828	1.19284	1.20278	alpha-Est3	CG1257	FBgn0015571
FBgn0015572	34	66	72	67	58	51	108	117	-1.34696	-0.201373	0.0134248	-0.165573	-0.48777	-0.738367	1.30221	1.62441	alpha-Est4	CG1082	FBgn0015572
FBgn0027934	0	0	0	0	0	0	172	0	-0.353553	-0.353553	-0.353553	-0.353553	-0.353553	-0.353553	2.47487	-0.353553	alpha-Est4aPsi	CR31511	FBgn0027934
FBgn0261393	38	124	165	123	117	131	382	893	-0.746447	-0.438744	-0.292049	-0.442322	-0.46379	-0.413699	0.484363	2.31269	alpha-Est5	CG1089	FBgn0261393
FBgn0015574	0	490	1043	650	91	125	0	0	-0.772453	0.489746	1.91423	0.901893	-0.538045	-0.450464	-0.772453	-0.772453	alpha-Est6	CG1108	FBgn0015574
FBgn0015575	0	2680	1446	1308	910	2446	4283	6902	-1.13458	0.0832119	-0.477517	-0.540224	-0.721075	-0.0231176	0.811614	2.00169	alpha-Est7	CG1112	FBgn0015575
FBgn0015576	0	434	249	163	94	241	610	1071	-1.03329	0.220232	-0.314102	-0.562495	-0.761787	-0.337208	0.728572	2.06008	alpha-Est8	CG1121	FBgn0015576
FBgn0015577	0	75	116	216	338	1924	2765	2490	-0.833798	-0.770664	-0.73615	-0.651971	-0.549272	0.785816	1.49377	1.26227	alpha-Est9	CG1128	FBgn0015577
FBgn0259170	1538	1101	993	887	2209	2665	3212	3008	-0.438559	-0.901903	-1.01641	-1.1288	0.27289	0.756379	1.33635	1.12006	alpha-Man-Ia	CG42275	FBgn0259170
FBgn0039634	699	1049	1143	1330	1438	1680	2273	916	-1.25006	-0.540948	-0.350502	0.0283643	0.247175	0.737473	1.9389	-0.81041	alpha-Man-Ib	CG11874	FBgn0039634
FBgn0051202	0	0	34	0	0	218	437	767	-0.641781	-0.641781	-0.521888	-0.641781	-0.641781	0.126946	0.899199	2.06287	alpha-Man-Ic	CG31202	FBgn0051202
FBgn0011740	2546	1741	1695	1189	733	544	544	620	1.83335	0.735658	0.672933	-0.0170449	-0.638843	-0.896562	-0.896562	-0.792929	alpha-Man-IIa	CG18802	FBgn0011740
FBgn0026616	1645	957	1037	465	904	332	504	473	1.96193	0.383899	0.567391	-0.744575	0.262336	-1.04963	-0.655123	-0.726226	alpha-Man-IIb	CG4606	FBgn0026616
FBgn0030007	2998	2056	2171	4323	4524	1042	1081	1279	0.404915	-0.271679	-0.18908	1.3566	1.50097	-0.999987	-0.971975	-0.829761	alpha-PheRS	CG2263	FBgn0030007
FBgn0250789	29608	13545	22402	44121	26699	24072	25214	17977	0.457744	-1.31261	-0.336454	2.05727	0.137133	-0.152398	-0.0265339	-0.824148	alpha-Spec	CG1977	FBgn0250789
FBgn0031491	295	761	630	479	390	329	379	389	-1.00531	1.89546	1.08001	0.140059	-0.413951	-0.793666	-0.482424	-0.420176	alpha4GT1	CG17223	FBgn0031491
FBgn0025725	5485	3853	3432	3089	4924	2864	3702	6244	1.05848	-0.284915	-0.631464	-0.913807	0.596685	-1.09902	-0.409212	1.68325	alphaCOP	CG7961	FBgn0025725
FBgn0035657	0	127	149	86	0	0	0	0	-0.698871	1.2626	1.60238	0.62937	-0.698871	-0.698871	-0.698871	-0.698871	alphaKap4	CG10478	FBgn0035657
FBgn0250791	1308	1611	1445	1424	2022	2584	3007	3201	-1.01211	-0.612412	-0.831389	-0.859091	-0.0702443	0.671113	1.22911	1.48502	alphaSnap	CG6625	FBgn0250791
FBgn0003863	75	42	0	0	0	53	3023	64105	-0.370089	-0.371554	-0.373419	-0.373419	-0.373419	-0.371066	-0.239228	2.47219	alphaTry	CG18444	FBgn0003863
FBgn0087040	208	59	34	53	0	0	0	0	2.31427	0.208461	-0.144863	0.123663	-0.625383	-0.625383	-0.625383	-0.625383	alphaTub67C	CG8308	FBgn0087040
FBgn0003884	215061	174827	336485	796375	217595	56019	42650	35203	-0.0767575	-0.237471	0.408268	2.24529	-0.0666354	-0.712048	-0.76545	-0.795197	alphaTub84B	CG1913	FBgn0003884
FBgn0003885	7389	6692	6565	9744	5709	10849	20113	30076	-0.552877	-0.633951	-0.648724	-0.278947	-0.748293	-0.150415	0.927162	2.08604	alphaTub84D	CG2512	FBgn0003885
FBgn0003886	43	25975	62117	80545	4380	912	374	303	-0.678038	0.128956	1.25368	1.82715	-0.543073	-0.650995	-0.667738	-0.669947	alphaTub85E	CG9476	FBgn0003886
FBgn0031068	876	630	870	1262	1570	2604	3774	2025	-0.774695	-1.00559	-0.780327	-0.412396	-0.123308	0.847202	1.94536	0.303754	Alr	CG12534	FBgn0031068
FBgn0039332	0	117	57	0	55	1478	2227	591	-0.67237	-0.53329	-0.604613	-0.67237	-0.60699	1.08456	1.97491	0.0301638	alrm	CG11910	FBgn0039332
FBgn0037116	948	529	590	464	536	637	1033	959	1.03178	-0.800068	-0.533378	-1.08424	-0.769464	-0.327897	1.4034	1.07987	Als2	CG7158	FBgn0037116
FBgn0038535	9884	5726	5015	4841	3765	2518	2339	4387	2.14285	0.387061	0.0868287	0.0133542	-0.441005	-0.967572	-1.04316	-0.178355	alt	CG18212	FBgn0038535
FBgn0004372	0	174	321	134	0	0	0	0	-0.651925	0.790809	2.00967	0.459146	-0.651925	-0.651925	-0.651925	-0.651925	aly	CG2075	FBgn0004372
FBgn0000071	8284	2800	1521	2017	481	166	81	61	2.30122	0.31622	-0.146731	0.0328029	-0.523172	-0.63719	-0.667957	-0.675196	Ama	CG2198	FBgn0000071
FBgn0032881	595	837	879	1279	1997	1783	2879	2572	-1.19382	-0.907103	-0.857342	-0.383427	0.467251	0.213706	1.51223	1.1485	Amacr	CG9319	FBgn0032881
FBgn0000075	1602	221	125	0	491	0	147	235	2.3647	-0.249128	-0.430827	-0.667416	0.261903	-0.667416	-0.389188	-0.22263	amd	CG10501	FBgn0000075
FBgn0086782	60	34	0	0	0	0	0	0	2.11257	0.974189	-0.51446	-0.51446	-0.51446	-0.51446	-0.51446	-0.51446	amn	CG11937	FBgn0086782
FBgn0025686	0	97	61	0	59	247	729	1823	-0.596584	-0.443086	-0.500055	-0.596584	-0.503219	-0.205719	0.557023	2.28822	Amnionless	CG11592	FBgn0025686
FBgn0023179	0	179	162	83	44	739	1098	603	-0.906573	-0.460145	-0.502543	-0.69957	-0.796836	0.936501	1.83185	0.597315	amon	CG6438	FBgn0023179
FBgn0003270	0	43	0	0	0	0	0	0	-0.353553	2.47487	-0.353553	-0.353553	-0.353553	-0.353553	-0.353553	-0.353553	amos	CG10393	FBgn0003270
FBgn0052626	3494	2580	2313	1548	3640	4986	7546	15917	-0.374702	-0.569402	-0.626279	-0.789239	-0.343601	-0.0568763	0.488455	2.27165	AMPdeam	CG32626	FBgn0052626
FBgn0027356	945	808	3646	50411	11745	44808	31445	16924	-0.966398	-0.973313	-0.830068	1.53034	-0.42128	1.24754	0.573055	-0.159876	Amph	CG8604	FBgn0027356
FBgn0023169	2915	2531	3454	4944	5978	9282	12297	13551	-0.915586	-1.0045	-0.790775	-0.445752	-0.206319	0.558753	1.2569	1.54728	AMPKalpha	CG3051	FBgn0023169
FBgn0030328	23780	11064	8875	9523	7333	4739	5380	6723	2.3205	0.228197	-0.131982	-0.0253598	-0.385704	-0.812523	-0.707052	-0.486074	Amun	CG2446	FBgn0030328
FBgn0000077	213	200	142	150	262	298	321	470	-0.408958	-0.529787	-1.06887	-0.994512	0.0464725	0.381075	0.594848	1.97973	amx	CG12127	FBgn0000077
FBgn0000078	0	0	0	0	0	159	4605	55401	-0.387404	-0.387404	-0.387404	-0.387404	-0.387404	-0.379213	-0.15019	2.46642	Amy-d	CG17876	FBgn0000078
FBgn0000079	37	0	0	0	0	196	5589	49204	-0.397464	-0.399614	-0.399614	-0.399614	-0.399614	-0.388227	-0.0749031	2.45905	Amy-p	CG18730	FBgn0000079
FBgn0011746	1849	1839	978	583	423	439	500	449	1.55913	1.543	0.154058	-0.483146	-0.741254	-0.715443	-0.617039	-0.699311	ana	CG8084	FBgn0011746
FBgn0262167	2106	1299	2450	1399	509	333	123	94	1.16823	0.284564	1.54491	0.394065	-0.580489	-0.77321	-1.00316	-1.03492	ana1	CG6631	FBgn0262167
FBgn0027513	606	466	494	275	62	52	0	0	1.45425	0.891251	1.00385	0.123157	-0.73341	-0.773624	-0.982739	-0.982739	ana2	CG8262	FBgn0027513
FBgn0266111	399	502	543	291	110	57	0	0	0.717164	1.17526	1.35761	0.236831	-0.568172	-0.803891	-1.0574	-1.0574	ana3	CG13162	FBgn0266111
FBgn0012037	18523	3827	8490	6734	2791	3468	11511	11797	1.88036	-0.847452	0.0180743	-0.307867	-1.03975	-0.914088	0.57882	0.631906	Ance	CG8827	FBgn0012037
FBgn0032535	150	37	39	0	186	382	135	0	0.262859	-0.613984	-0.598465	-0.901092	0.542207	2.0631	0.146464	-0.901092	Ance-2	CG16869	FBgn0032535
FBgn0032536	0	46	0	0	168	118	86	69	-0.984293	-0.240515	-0.984293	-0.984293	1.73211	0.923659	0.406248	0.131374	Ance-3	CG17988	FBgn0032536
FBgn0033366	0	5402	4008	5217	1756	2334	1599	266	-1.22913	1.35167	0.685688	1.26328	-0.390201	-0.114062	-0.465207	-1.10204	Ance-4	CG8196	FBgn0033366
FBgn0035076	179	267	339	358	465	1106	1331	1302	-0.999278	-0.819586	-0.672566	-0.633769	-0.415281	0.893607	1.35304	1.29383	Ance-5	CG10142	FBgn0035076
FBgn0036741	661	503	357	310	406	1050	2062	2302	-0.371942	-0.570899	-0.754745	-0.813928	-0.693043	0.117894	1.39222	1.69444	anchor	CG7510	FBgn0036741
FBgn0030898	0	126	274	175	0	62	0	0	-0.770794	0.448924	1.88161	0.923259	-0.770794	-0.170615	-0.770794	-0.770794	Andorra	CG12611	FBgn0030898
FBgn0016762	690	372	461	757	1879	915	774	680	-0.27196	-0.958336	-0.766237	-0.127346	2.29439	0.213683	-0.0906534	-0.293544	angel	CG12273	FBgn0016762
FBgn0011747	1630	2794	2478	2277	1598	1934	1753	1024	-0.54345	1.52379	0.962582	0.60561	-0.600282	-0.00355196	-0.325005	-1.6197	Ank	CG1651	FBgn0011747
FBgn0261788	214	3255	4907	5618	6695	12370	16020	9397	-1.39294	-0.795951	-0.471642	-0.332064	-0.120634	0.993442	1.70999	0.409804	Ank2	CG42734	FBgn0261788
FBgn0028343	5092	1932	1519	1689	2835	1802	1980	2013	2.33405	-0.363434	-0.715985	-0.570867	0.407396	-0.474407	-0.32246	-0.29429	Ankle2	CG8465	FBgn0028343
FBgn0052000	1323	1968	1174	923	1089	853	544	872	0.54113	2.0603	0.19019	-0.40099	-0.01001	-0.565861	-1.29365	-0.52111	anne	CG32000	FBgn0052000
FBgn0025111	534	1428	2949	2262	1262	1114	830	1028	-1.11835	0.0026646	1.90989	1.04844	-0.205488	-0.39107	-0.747186	-0.498908	Ant2	CG1683	FBgn0025111
FBgn0026268	59	0	0	0	0	51	0	0	1.77106	-0.538167	-0.538167	-0.538167	-0.538167	1.45794	-0.538167	-0.538167	antdh	CG1386	FBgn0026268
FBgn0260642	4265	1310	930	482	306	192	216	217	2.36803	0.231543	-0.0431997	-0.367107	-0.494357	-0.57678	-0.559428	-0.558705	Antp	CG1028	FBgn0260642
FBgn0000084	664	454	369	356	636	1429	2159	2535	-0.477394	-0.721169	-0.81984	-0.834931	-0.509897	0.410646	1.25806	1.69453	AnxB10	CG9579	FBgn0000084
FBgn0030749	4296	2651	1753	2935	3972	3714	2601	3069	1.40723	-0.567723	-1.64584	-0.226759	1.01824	0.708491	-0.627752	-0.0658817	AnxB11	CG9968	FBgn0030749
FBgn0000083	15186	4397	4529	7329	21176	12684	14689	17499	0.485323	-1.26013	-1.23878	-0.785791	1.45439	0.0805468	0.404918	0.859523	AnxB9	CG5730	FBgn0000083
FBgn0000097	12462	3475	3202	7715	7943	333	14215	5387	1.18683	-0.710872	-0.768519	0.184449	0.232593	-1.37434	1.55699	-0.307133	aop	CG3166	FBgn0000097
FBgn0004569	2626	360	325	226	631	280	317	190	2.44204	-0.315657	-0.358252	-0.478734	0.0141475	-0.413016	-0.367988	-0.522545	aos	CG4531	FBgn0004569
FBgn0029512	5339	3043	1870	1602	1830	1004	875	732	2.16425	0.659426	-0.109372	-0.285022	-0.135588	-0.676959	-0.761507	-0.855231	Aos1	CG12276	FBgn0029512
FBgn0267408	61	424	425	284	81	753	5427	24137	-0.465509	-0.422047	-0.421927	-0.438809	-0.463114	-0.382656	0.17696	2.4171	AOX1	CG18522	FBgn0267408
FBgn0038348	36	44	124	494	588	0	69	0	-0.569716	-0.535543	-0.193821	1.38665	1.78817	-0.723491	-0.428755	-0.723491	AOX2	CG18519	FBgn0038348
FBgn0038349	474	618	4064	13274	10807	3778	3892	3775	-1.00658	-0.975144	-0.222926	1.7875	1.24899	-0.285356	-0.260471	-0.286011	AOX3	CG6045	FBgn0038349
FBgn0000099	4945	1682	1291	655	647	192	78	167	2.31749	0.294423	0.0520026	-0.342318	-0.347278	-0.629379	-0.700059	-0.644879	ap	CG8376	FBgn0267978
FBgn0010380	4561	2702	2427	3059	3982	5318	5835	6093	0.219173	-1.07893	-1.27096	-0.829646	-0.185132	0.747773	1.10878	1.28894	AP-1-2beta	CG12532	FBgn0010380
FBgn0030089	4694	2008	2077	3977	3017	2847	2860	4180	1.51362	-1.22138	-1.15112	0.783539	-0.193976	-0.367077	-0.35384	0.990242	AP-1gamma	CG9113	FBgn0030089
FBgn0024833	2674	1416	1342	1030	2094	1815	2090	3240	0.972341	-0.747153	-0.848299	-1.27476	0.179569	-0.201781	0.174102	1.74598	AP-1mu	CG9388	FBgn0024833
FBgn0039132	638	939	832	657	920	560	768	428	-0.445492	1.23593	0.638213	-0.339356	1.12979	-0.881209	0.280702	-1.61858	AP-1sigma	CG5864	FBgn0039132
FBgn0264855	2434	2782	2541	2695	3537	6576	6908	4630	-0.862268	-0.672216	-0.803832	-0.719729	-0.259889	1.39979	1.58111	0.337029	AP-2alpha	CG4260	FBgn0264855
FBgn0263351	2307	2024	2250	2994	3126	4423	4578	4282	-0.898508	-1.16873	-0.952934	-0.24253	-0.116491	1.12194	1.26994	0.987308	AP-2mu	CG7057	FBgn0263351
FBgn0043012	901	1219	779	578	1478	1316	2145	2084	-0.715114	-0.162486	-0.927129	-1.27643	0.28761	0.00608238	1.44674	1.34073	AP-2sigma	CG6056	FBgn0043012
FBgn0015589	2480	3302	7314	11074	4515	1758	2122	2285	-0.574869	-0.323014	0.906232	2.05827	0.0486398	-0.796084	-0.684557	-0.634615	Apc	CG1451	FBgn0015589
FBgn0034231	372	277	245	415	343	330	255	242	0.959902	-0.507956	-1.00239	1.6243	0.511819	0.310954	-0.847881	-1.04875	APC10	CG11419	FBgn0034231
FBgn0026598	2222	1022	625	285	270	100	111	141	2.22987	0.583197	0.0384224	-0.428135	-0.448719	-0.681998	-0.666903	-0.625736	Apc2	CG6193	FBgn0026598
FBgn0052707	948	572	603	551	511	289	216	203	1.85899	0.343996	0.468902	0.259382	0.0982126	-0.796278	-1.09041	-1.14279	APC4	CG32707	FBgn0052707
FBgn0026150	1492	2472	2565	3385	3455	1085	788	986	-0.496808	0.410689	0.496808	1.25614	1.32096	-0.873697	-1.14872	-0.965373	ApepP	CG6291	FBgn0026150
FBgn0031458	668	1009	629	449	487	329	322	421	0.56651	2.06694	0.394907	-0.397107	-0.229904	-0.925116	-0.955917	-0.520309	aph-1	CG2855	FBgn0031458
FBgn0261854	2729	1787	1527	1458	1239	1462	1475	1225	2.30657	0.360062	-0.17719	-0.319768	-0.772299	-0.311503	-0.28464	-0.801228	aPKC	CG42783	FBgn0261854
FBgn0042178	255	998	1742	1266	635	308	116	161	-0.722539	0.525578	1.77538	0.975774	-0.0842017	-0.633508	-0.956036	-0.880444	Apl	CG32165	FBgn0042178
FBgn0040281	0	403	347	235	77	316	418	368	-1.74289	0.853725	0.492905	-0.228734	-1.24676	0.293166	0.950373	0.628213	Aplip1	CG1200	FBgn0040281
FBgn0038132	0	0	0	0	0	1088	7207	0	-0.411131	-0.411131	-0.411131	-0.411131	-0.411131	0.0202715	2.44651	-0.411131	apn	CG15887	FBgn0038132
FBgn0087002	0	17839	4622	3521	2358	719	118	343	-0.618358	2.37104	0.156182	-0.0283205	-0.223212	-0.497871	-0.598584	-0.56088	apolpp	CG11064	FBgn0087002
FBgn0032136	60	1762	1563	1510	1000	1256	1301	1596	-2.2218	0.939994	0.570313	0.471855	-0.47557	0	0.0835963	0.631617	Apoltp	CG15828	FBgn0032136
FBgn0260941	2406	1336	1453	997	1181	1388	1387	1245	2.32448	-0.208626	0.0683583	-1.01117	-0.575571	-0.0855218	-0.0878892	-0.424058	app	CG42318	FBgn0260941
FBgn0261112	909	1585	2580	1910	1372	784	466	523	-0.484313	0.432441	1.7818	0.873188	0.143582	-0.653831	-1.08509	-1.00779	APP-BP1	CG7828	FBgn0261112
FBgn0000108	372	4793	3609	2237	821	3442	4025	1903	-1.44948	1.36328	0.609983	-0.262921	-1.16382	0.503733	0.874654	-0.475421	Appl	CG7727	FBgn0000108
FBgn0000109	238	411	259	468	512	195	338	471	-1.02077	0.409133	-0.847194	0.880255	1.24393	-1.37617	-0.194235	0.905051	Aprt	CG18315	FBgn0000109
FBgn0036111	8575	6764	5334	5862	8717	6042	5454	6310	1.46816	0.0995649	-0.981102	-0.582086	1.57547	-0.446058	-0.890416	-0.243528	Aps	CG6391	FBgn0036111
FBgn0015903	984	974	861	470	1243	427	670	1194	0.42642	0.3939	0.0264226	-1.24512	1.26869	-1.38495	-0.594712	1.10934	apt	CG5393	FBgn0015903
FBgn0042138	1220	1456	1699	2412	3473	3824	4637	3179	-1.23005	-1.03875	-0.841783	-0.263843	0.596179	0.880691	1.53969	0.357869	Apt1	CG18815	FBgn0042138
FBgn0033807	0	90	851	3995	1853	17077	35935	33682	-0.762231	-0.75636	-0.706721	-0.501639	-0.641361	0.351693	1.58179	1.43483	AQP	CG12251	FBgn0033807
FBgn0037636	112013	38174	22360	16715	25309	15829	17018	31219	2.40094	0.104034	-0.387893	-0.563492	-0.296158	-0.591053	-0.554067	-0.112316	aqz	CG9821	FBgn0286516
FBgn0015904	3366	825	657	419	763	574	897	1598	2.3059	-0.323207	-0.497032	-0.743285	-0.387357	-0.58291	-0.24871	0.476597	ara	CG10571	FBgn0015904
FBgn0028646	1992	592	345	325	285	692	5446	10727	-0.149425	-0.523992	-0.590076	-0.595427	-0.606129	-0.497237	0.774684	2.1876	aralar1	CG2139	FBgn0028646
FBgn0033926	6543	8169	6909	9556	3990	5996	5401	8824	-0.2054	0.67234	-0.00782732	1.42106	-1.58355	-0.500679	-0.821869	1.02592	Arc1	CG12505	FBgn0033926
FBgn0033928	903	211	167	201	245	285	235	507	2.24482	-0.535343	-0.712116	-0.575518	-0.398745	-0.238042	-0.438921	0.653861	Arc2	CG13941	FBgn0033928
FBgn0038742	2049	1577	1332	3881	8420	7658	6795	5126	-0.904554	-1.07161	-1.15832	-0.256156	1.35033	1.08063	0.775193	0.184485	Arc42	CG4703	FBgn0038742
FBgn0038893	322	293	234	327	539	373	346	483	-0.425455	-0.714914	-1.30381	-0.375548	1.7405	0.0835938	-0.185903	1.18154	Archease	CG6353	FBgn0038893
FBgn0013749	280	867	340	159	156	112	62	214	0.0244347	2.31934	0.259008	-0.448621	-0.46035	-0.63237	-0.827848	-0.233596	Arf102F	CG11027	FBgn0013749
FBgn0013750	1388	1423	1094	1177	1788	1696	1849	2853	-0.486907	-0.423906	-1.01612	-0.866713	0.233103	0.067501	0.342905	2.15013	Arf51F	CG8156	FBgn0013750
FBgn0010348	13289	11577	9595	6631	7877	5887	7247	8519	1.75912	1.08406	0.302535	-0.866203	-0.374891	-1.15957	-0.623307	-0.121744	Arf79F	CG8385	FBgn0010348
FBgn0020655	2040	1278	1020	1113	1551	1393	1992	3136	0.504361	-0.594883	-0.967068	-0.832908	-0.201059	-0.428986	0.435117	2.08543	ArfGAP1	CG4237	FBgn0020655
FBgn0037182	4317	1860	1973	2371	1660	1621	1915	2655	2.27558	-0.491606	-0.36434	0.0839052	-0.716854	-0.760778	-0.429662	0.403758	ArfGAP3	CG6838	FBgn0037182
FBgn0037884	1132	834	1084	879	626	820	793	936	1.49869	-0.331678	1.20387	-0.0552797	-1.60925	-0.417669	-0.583508	0.294825	Arfip	CG17184	FBgn0037884
FBgn0030088	478	250	292	358	197	182	203	252	2.02311	-0.266066	0.155624	0.81828	-0.798199	-0.948803	-0.737958	-0.245986	Arfrp1	CG7039	FBgn0030088
FBgn0023535	0	158	59	100	55	84	77	81	-1.72287	1.82389	-0.398449	0.521912	-0.48824	0.162747	0.00561196	0.0954033	arg	CG18104	FBgn0023535
FBgn0000116	58578	104445	291629	548737	640481	376878	265854	248356	-1.28719	-1.05861	-0.125787	1.1555	1.61271	0.299049	-0.254236	-0.341436	Argk	CG32031	FBgn0000116
FBgn0032076	95	632	504	480	173	488	606	1008	-1.42798	0.473634	0.0203618	-0.0646267	-1.15177	-0.0362972	0.381563	1.80512	Argl	CG9510	FBgn0032076
FBgn0027093	1239	1250	1263	1333	2704	1561	1299	867	-0.367833	-0.347652	-0.323803	-0.195382	2.31982	0.222901	-0.257758	-1.05029	ArgRS	CG9020	FBgn0027093
FBgn0037526	248	224	251	282	936	520	485	322	-0.667566	-0.767388	-0.655088	-0.52615	2.19402	0.463761	0.318185	-0.359778	ArgRS-m	CG10092	FBgn0037526
FBgn0017418	1534	1496	1389	1692	2057	5344	5171	4913	-0.773315	-0.794075	-0.852531	-0.686997	-0.48759	1.30816	1.21365	1.0727	ari-1	CG5659	FBgn0017418
FBgn0025186	2081	1717	2254	2881	1643	2443	1960	1343	0.0833965	-0.661544	0.437448	1.72063	-0.812988	0.824244	-0.164235	-1.42695	ari-2	CG5709	FBgn0025186
FBgn0000115	1392	1168	1105	1675	1450	993	851	1441	0.482186	-0.332213	-0.561262	1.51109	0.693057	-0.968462	-1.48473	0.660336	Arl1	CG6025	FBgn0000115
FBgn0004908	245	414	427	254	170	91	57	84	0.188408	1.35688	1.44676	0.250634	-0.330145	-0.876354	-1.11143	-0.924753	Arl2	CG7435	FBgn0004908
FBgn0039889	200	533	161	91	214	132	61	137	0.060273	2.32179	-0.204589	-0.679982	0.155352	-0.401537	-0.883722	-0.367581	Arl4	CG2219	FBgn0039889
FBgn0035866	810	596	486	329	827	1147	965	1161	0.0657275	-0.64198	-1.00575	-1.52496	0.121947	1.1802	0.578319	1.2265	Arl5	CG7197	FBgn0035866
FBgn0034446	99	53	49	0	0	0	0	0	1.95838	0.73895	0.632912	-0.666049	-0.666049	-0.666049	-0.666049	-0.666049	Arl6	CG7735	FBgn0034446
FBgn0038453	1143	1577	1363	1059	518	389	316	289	0.606889	1.45312	1.03586	0.443102	-0.611764	-0.863294	-1.00563	-1.05828	Arl6IP1	CG10326	FBgn0038453
FBgn0037551	1133	1111	784	539	837	1082	1618	2177	-0.0522766	-0.0946761	-0.724887	-1.19706	-0.622742	-0.150566	0.882439	1.95977	Arl8	CG7891	FBgn0037551
FBgn0000117	28939	19737	20398	21773	19258	12502	11138	10660	1.73587	0.268848	0.374228	0.593435	0.192484	-0.884583	-1.10204	-1.17824	arm	CG11579	FBgn0000117
FBgn0041164	1445	878	774	449	240	106	74	64	1.90557	0.757673	0.547124	-0.110842	-0.533965	-0.805249	-0.870034	-0.890279	armi	CG11513	FBgn0041164
FBgn0011745	5129	2880	2331	2851	4215	4409	4996	5328	0.949157	-0.971143	-1.4399	-0.995905	0.168741	0.334387	0.835595	1.11907	Arp1	CG6174	FBgn0011745
FBgn0031050	1945	716	694	1078	1248	1524	1577	1779	1.33684	-1.29245	-1.33952	-0.517996	-0.154302	0.436165	0.549552	0.981706	Arp10	CG12235	FBgn0031050
FBgn0011742	3516	2314	2219	1651	2357	1331	1251	1629	2.00388	0.379149	0.250738	-0.517021	0.437271	-0.949561	-1.0577	-0.546758	Arp2	CG9901	FBgn0011742
FBgn0262716	3995	2555	2156	1538	2127	1480	1617	2378	2.15861	0.396728	-0.0914586	-0.847598	-0.126941	-0.918562	-0.750939	0.180164	Arp3	CG7558	FBgn0262716
FBgn0038576	987	728	919	895	584	554	433	444	1.33333	0.15873	1.02494	0.916097	-0.494329	-0.630383	-1.17913	-1.12925	Arp5	CG7940	FBgn0038576
FBgn0011743	0	1189	2185	1282	211	216	0	0	-0.775983	0.676142	1.89256	0.789723	-0.518289	-0.512182	-0.775983	-0.775983	Arp53D	CG5409	FBgn0011743
FBgn0011741	3564	1738	1618	2113	2254	2031	2227	2295	2.25291	-0.830909	-1.03357	-0.197594	0.0405321	-0.336079	-0.00506652	0.109775	Arp6	CG11678	FBgn0011741
FBgn0030877	977	424	442	977	343	169	173	233	1.53891	-0.130569	-0.0762284	1.53891	-0.375104	-0.900401	-0.888325	-0.707188	Arp8	CG7846	FBgn0030877
FBgn0001961	4638	4019	5176	4202	3258	2292	2443	3078	0.964152	0.367193	1.483	0.543677	-0.366711	-1.29831	-1.15269	-0.540301	Arpc1	CG8978	FBgn0001961
FBgn0032859	2062	2053	1844	1703	1590	987	998	946	1.12513	1.10635	0.670175	0.375914	0.140087	-1.11835	-1.09539	-1.20391	Arpc2	CG10954	FBgn0032859
FBgn0038369	1723	1947	1915	1966	1085	1204	1115	1353	0.474856	1.05138	0.969016	1.10028	-1.16719	-0.860918	-1.08998	-0.47743	Arpc3A	CG4560	FBgn0038369
FBgn0065032	0	412	128	54	48	72	181	303	-1.05252	1.84322	-0.15287	-0.672978	-0.715148	-0.546465	0.21964	1.07712	Arpc3B	CG8936	FBgn0065032
FBgn0031781	2544	1696	1444	2397	1832	2168	2472	2447	1.00815	-1.03221	-1.63854	0.654455	-0.704983	0.103462	0.834912	0.77476	Arpc4	CG5972	FBgn0284255
FBgn0031437	2678	2591	2480	3628	2275	1052	892	1558	0.580367	0.485768	0.365074	1.61334	0.142169	-1.18765	-1.36162	-0.637452	Arpc5	CG9881	FBgn0031437
FBgn0000119	7073	3156	2895	1629	1861	1043	1521	1454	2.29714	0.294937	0.161525	-0.485598	-0.36701	-0.785136	-0.540803	-0.575051	arr	CG5912	FBgn0000119
FBgn0000120	0	111	228	205	34	481	76	92	-0.999306	-0.276092	0.486215	0.33636	-0.777781	2.13462	-0.504133	-0.399885	Arr1	CG5711	FBgn0000120
FBgn0000121	73	0	0	0	97	930	230	138	-0.35396	-0.587798	-0.587798	-0.587798	-0.277082	2.39123	0.148951	-0.145748	Arr2	CG5962	FBgn0000121
FBgn0033062	7242	5627	4873	3784	4086	1815	1999	2233	1.70892	0.86867	0.47638	-0.0902033	0.0669208	-1.11463	-1.0189	-0.897155	Ars2	CG7843	FBgn0033062
FBgn0037834	5573	4312	2167	2305	1137	473	658	894	1.82539	1.14501	-0.0123424	0.0621166	-0.568087	-0.926353	-0.826535	-0.699199	Art1	CG6554	FBgn0037834
FBgn0031592	0	78	152	75	0	0	0	0	-0.662455	0.692863	1.97868	0.640735	-0.662455	-0.662455	-0.662455	-0.662455	Art2	CG3675	FBgn0031592
FBgn0038306	943	1089	927	2197	908	208	211	247	0.15357	0.373925	0.129421	2.04621	0.100745	-0.955754	-0.951226	-0.896892	Art3	CG6563	FBgn0038306
FBgn0037770	2477	1816	1141	952	485	126	194	237	1.81601	1.04082	0.249211	0.0275598	-0.520118	-0.941138	-0.86139	-0.810962	Art4	CG5358	FBgn0037770
FBgn0038189	0	79	146	81	0	0	0	0	-0.675967	0.720148	1.9042	0.755493	-0.675967	-0.675967	-0.675967	-0.675967	Art6	CG9927	FBgn0038189
FBgn0034817	1005	455	693	2066	1777	827	863	465	-0.0233889	-0.950516	-0.549323	1.76512	1.27796	-0.323441	-0.262756	-0.933659	Art7	CG9882	FBgn0034817
FBgn0038188	0	0	48	0	0	0	0	0	-0.353553	-0.353553	2.47487	-0.353553	-0.353553	-0.353553	-0.353553	-0.353553	Art9	CG9929	FBgn0038188
FBgn0042177	1726	827	994	1312	1075	316	349	317	1.66623	-0.072529	0.250467	0.865513	0.407129	-1.06086	-0.997032	-1.05892	Arts	CG32164	FBgn0042177
FBgn0029095	12033	1281	1443	1548	2912	1581	1439	4091	2.38491	-0.54835	-0.504154	-0.475509	-0.103395	-0.466507	-0.505246	0.218249	aru	CG4276	FBgn0029095
FBgn0052442	145	129	134	162	282	261	363	433	-0.811249	-0.949887	-0.906562	-0.663946	0.375839	0.193877	1.07769	1.68423	Arv1	CG32442	FBgn0052442
FBgn0036826	127	186	144	93	71	96	92	119	0.301075	1.91593	0.766374	-0.629521	-1.23167	-0.54741	-0.656892	0.0821115	arx	CG3893	FBgn0036826
FBgn0058064	0	64	35	0	0	0	0	0	-0.511589	2.1342	0.935329	-0.511589	-0.511589	-0.511589	-0.511589	-0.511589	ARY	CG40064	FBgn0058064
FBgn0050372	2525	1800	1612	1688	2302	1983	2543	3320	0.529334	-0.735658	-1.06368	-0.931078	0.14024	-0.416357	0.560741	1.91646	Asap	CG30372	FBgn0050372
FBgn0039908	629	1000	1238	1362	2773	2441	2397	1733	-1.38625	-0.904528	-0.595499	-0.434492	1.39761	0.966529	0.909398	0.0472309	Asator	CG11533	FBgn0039908
FBgn0035407	168	208	224	237	178	144	135	120	-0.203406	0.72645	1.09839	1.40059	0.029058	-0.761319	-0.970537	-1.31923	Asciz	CG14962	FBgn0035407
FBgn0029094	1821	1735	631	521	658	514	682	589	1.68749	1.53096	-0.478466	-0.67868	-0.429323	-0.691421	-0.38564	-0.554912	asf1	CG9383	FBgn0029094
FBgn0005386	2341	1670	2242	1901	1548	1418	1168	1022	1.42516	0.0131521	1.21683	0.499253	-0.243577	-0.51714	-1.04322	-1.35046	ash1	CG8887	FBgn0005386
FBgn0000139	2427	1285	1119	1240	1207	766	744	750	2.24406	0.168566	-0.133126	0.0867818	0.0268069	-0.774675	-0.814659	-0.803754	ash2	CG6677	FBgn0000139
FBgn0014006	2541	2213	2871	3886	3675	3983	3611	2706	-0.948084	-1.4304	-0.46283	1.02969	0.719426	1.17233	0.625316	-0.705457	Ask1	CG4720	FBgn0014006
FBgn0261004	2177	1252	1229	540	327	393	267	238	1.98892	0.650066	0.616775	-0.380487	-0.688784	-0.593255	-0.775628	-0.817603	asl	CG2919	FBgn0261004
FBgn0086443	7466	4213	4761	8777	6268	2346	4893	3313	1.03406	-0.487072	-0.230823	1.64709	0.473862	-1.36009	-0.169099	-0.907918	AsnRS	CG10687	FBgn0086443
FBgn0034177	103	241	269	506	1264	422	303	118	-0.803389	-0.434138	-0.359217	0.274932	2.30314	0.05017	-0.268242	-0.763253	AsnRS-m	CG6796	FBgn0034177
FBgn0041607	4833	523	440	802	467	1394	4057	4823	1.31486	-0.81111	-0.852051	-0.67349	-0.838733	-0.381478	0.932083	1.30992	AsnS	CG33486	FBgn0270926
FBgn0000140	2023	1740	1275	593	80	99	0	0	1.55085	1.21239	0.656277	-0.15936	-0.772883	-0.75016	-0.868559	-0.868559	asp	CG6875	FBgn0000140
FBgn0034075	304	4263	7736	15855	59484	12454	10992	17179	-0.852628	-0.638026	-0.449768	-0.00966901	2.35529	-0.194024	-0.273273	0.0620998	Asph	CG8421	FBgn0034075
FBgn0034606	11575	1764	1638	1022	1576	648	884	1650	2.45888	-0.22743	-0.26193	-0.430595	-0.278906	-0.532998	-0.46838	-0.258644	ASPP	CG18375	FBgn0034606
FBgn0031089	390	755	630	716	37	333	2835	5504	-0.541026	-0.345507	-0.412466	-0.366398	-0.730118	-0.571559	0.768686	2.19839	aspr	CG9572	FBgn0031089
FBgn0002069	2991	994	1463	7341	6202	4115	3228	3023	-0.311646	-1.22873	-1.01335	1.68601	1.16295	0.20453	-0.202808	-0.29695	AspRS	CG3821	FBgn0002069
FBgn0051739	2059	2324	2793	2185	3986	1729	1629	888	-0.153331	0.136644	0.649844	-0.0154562	1.95528	-0.514431	-0.623856	-1.43469	AspRS-m	CG31739	FBgn0051739
FBgn0034793	1864	1196	1614	4919	10244	10599	10687	7951	-1.00898	-1.16682	-1.06805	-0.287141	0.971058	1.05494	1.07573	0.429264	asrij	CG13533	FBgn0034793
FBgn0263619	0	0	0	0	242	796	500	71	-0.673842	-0.673842	-0.673842	-0.673842	0.136946	1.99305	1.00134	-0.435966	asRNA:ASTR	CR43628	FBgn0263619
FBgn0051514	187	176	112	115	64	0	0	0	1.35322	1.21179	0.388929	0.427501	-0.228215	-1.05107	-1.05107	-1.05107	asRNA:CR31514	CR31514	FBgn0051514
FBgn0051845	41	0	36	0	0	0	0	0	1.75553	-0.53855	1.47577	-0.53855	-0.53855	-0.53855	-0.53855	-0.53855	asRNA:CR31845	CR31845	FBgn0051845
FBgn0052252	0	73	90	0	0	0	0	0	-0.536188	1.38488	1.83225	-0.536188	-0.536188	-0.536188	-0.536188	-0.536188	asRNA:CR32252	CR32252	FBgn0052252
FBgn0046756	66	0	0	0	0	0	0	0	2.47487	-0.353553	-0.353553	-0.353553	-0.353553	-0.353553	-0.353553	-0.353553	asRNA:CR33945	CR33945	FBgn0046756
FBgn0259112	36	74	43	0	38	0	0	0	0.432371	1.78743	0.681988	-0.851371	0.50369	-0.851371	-0.851371	-0.851371	asRNA:CR42254	CR42254	FBgn0259112
FBgn0260720	82	43	43	0	0	0	0	0	1.94376	0.701029	0.701029	-0.669164	-0.669164	-0.669164	-0.669164	-0.669164	asRNA:CR42547	CR42547	FBgn0260720
FBgn0262107	0	0	0	0	159	91	0	84	-0.676341	-0.676341	-0.676341	-0.676341	1.89942	0.797839	-0.676341	0.684441	asRNA:CR42860	CR42860	FBgn0262107
FBgn0262682	0	117	82	0	0	0	0	0	-0.529257	1.96011	1.21543	-0.529257	-0.529257	-0.529257	-0.529257	-0.529257	asRNA:CR43152	CR43152	FBgn0262682
FBgn0262689	0	40	43	0	0	0	0	0	-0.539592	1.54076	1.69679	-0.539592	-0.539592	-0.539592	-0.539592	-0.539592	asRNA:CR43159	CR43159	FBgn0262689
FBgn0262690	0	149	226	133	0	0	0	0	-0.693384	0.933612	1.77441	0.758901	-0.693384	-0.693384	-0.693384	-0.693384	asRNA:CR43160	CR43160	FBgn0262690
FBgn0262902	34	0	0	0	0	0	0	0	2.47487	-0.353553	-0.353553	-0.353553	-0.353553	-0.353553	-0.353553	-0.353553	asRNA:CR43257	CR43257	FBgn0262902
FBgn0262991	0	44	81	0	0	0	0	0	-0.511036	0.928041	2.13817	-0.511036	-0.511036	-0.511036	-0.511036	-0.511036	asRNA:CR43299	CR43299	FBgn0262991
FBgn0263381	0	90	123	82	0	0	0	0	-0.706399	1.01769	1.64986	0.864441	-0.706399	-0.706399	-0.706399	-0.706399	asRNA:CR43433	CR43433	FBgn0263381
FBgn0263441	0	0	36	0	0	0	0	0	-0.353553	-0.353553	2.47487	-0.353553	-0.353553	-0.353553	-0.353553	-0.353553	asRNA:CR43464	CR43464	FBgn0263441
FBgn0263453	0	60	42	0	0	0	0	0	-0.529187	1.9611	1.21402	-0.529187	-0.529187	-0.529187	-0.529187	-0.529187	asRNA:CR43476	CR43476	FBgn0263453
FBgn0263492	143	93	115	100	43	0	0	0	1.39732	0.537431	0.915783	0.657816	-0.322459	-1.06196	-1.06196	-1.06196	asRNA:CR43481	CR43481	FBgn0263492
FBgn0263620	160	67	42	98	483	573	531	471	-0.621027	-1.02456	-1.13304	-0.890048	0.780487	1.171	0.988762	0.728419	asRNA:CR43629	CR43629	FBgn0263620
FBgn0263628	0	77	155	103	0	0	0	0	-0.680135	0.570502	1.83738	0.992795	-0.680135	-0.680135	-0.680135	-0.680135	asRNA:CR43637	CR43637	FBgn0263628
FBgn0263967	103	45	0	0	89	149	81	0	0.794996	-0.238276	-1.03995	-1.03995	0.545586	1.61449	0.403065	-1.03995	asRNA:CR43723	CR43723	FBgn0263967
FBgn0264446	59	0	0	0	0	0	0	0	2.47487	-0.353553	-0.353553	-0.353553	-0.353553	-0.353553	-0.353553	-0.353553	asRNA:CR43864	CR43864	FBgn0264446
FBgn0264481	48	0	0	0	0	0	0	0	2.47487	-0.353553	-0.353553	-0.353553	-0.353553	-0.353553	-0.353553	-0.353553	asRNA:CR43889	CR43889	FBgn0264481
FBgn0264547	0	45	44	0	0	0	0	0	-0.540016	1.64432	1.59578	-0.540016	-0.540016	-0.540016	-0.540016	-0.540016	asRNA:CR43926	CR43926	FBgn0264547
FBgn0264617	0	83	0	0	0	0	0	0	-0.353553	2.47487	-0.353553	-0.353553	-0.353553	-0.353553	-0.353553	-0.353553	asRNA:CR43957	CR43957	FBgn0264617
FBgn0264674	0	0	0	0	0	90	90	0	-0.540062	-0.540062	-0.540062	-0.540062	-0.540062	1.62019	1.62019	-0.540062	asRNA:CR43959	CR43959	FBgn0264674
FBgn0264702	696	58	61	60	72	0	0	0	2.45288	-0.256382	-0.243642	-0.247889	-0.196931	-0.502678	-0.502678	-0.502678	asRNA:CR43971	CR43971	FBgn0264702
FBgn0264788	0	95	0	0	0	0	0	0	-0.353553	2.47487	-0.353553	-0.353553	-0.353553	-0.353553	-0.353553	-0.353553	asRNA:CR44018	CR44018	FBgn0264788
FBgn0264819	0	170	189	137	0	92	0	0	-0.881774	1.1577	1.38565	0.761805	-0.881774	0.221943	-0.881774	-0.881774	asRNA:CR44027	CR44027	FBgn0264819
FBgn0264821	94	177	83	95	78	0	0	0	0.449154	1.77466	0.273485	0.465124	0.193635	-1.05202	-1.05202	-1.05202	asRNA:CR44029	CR44029	FBgn0264821
FBgn0264871	0	52	0	0	0	0	0	0	-0.353553	2.47487	-0.353553	-0.353553	-0.353553	-0.353553	-0.353553	-0.353553	asRNA:CR44062	CR44062	FBgn0264871
FBgn0264986	0	47	0	0	0	0	0	0	-0.353553	2.47487	-0.353553	-0.353553	-0.353553	-0.353553	-0.353553	-0.353553	asRNA:CR44137	CR44137	FBgn0264986
FBgn0265065	0	59	43	0	0	0	0	0	-0.531415	1.92768	1.26081	-0.531415	-0.531415	-0.531415	-0.531415	-0.531415	asRNA:CR44176	CR44176	FBgn0265065
FBgn0265252	0	0	40	0	0	0	0	0	-0.353553	-0.353553	2.47487	-0.353553	-0.353553	-0.353553	-0.353553	-0.353553	asRNA:CR44266	CR44266	FBgn0265252
FBgn0265380	0	0	0	0	42	73	89	87	-0.878618	-0.878618	-0.878618	-0.878618	0.135869	0.884656	1.27113	1.22282	asRNA:CR44321	CR44321	FBgn0265380
FBgn0265458	0	47	62	0	0	0	0	0	-0.53337	1.30651	1.89371	-0.53337	-0.53337	-0.53337	-0.53337	-0.53337	asRNA:CR44358	CR44358	FBgn0265458
FBgn0265508	187	1082	1840	1009	156	239	0	0	-0.562637	0.772624	1.90349	0.663714	-0.608887	-0.485058	-0.841625	-0.841625	asRNA:CR44370	CR44370	FBgn0265508
FBgn0265532	57	0	0	0	0	0	0	0	2.47487	-0.353553	-0.353553	-0.353553	-0.353553	-0.353553	-0.353553	-0.353553	asRNA:CR44382	CR44382	FBgn0265532
FBgn0265611	0	0	0	0	42	0	0	76	-0.512443	-0.512443	-0.512443	-0.512443	0.946717	-0.512443	-0.512443	2.12794	asRNA:CR44429	CR44429	FBgn0265611
FBgn0265705	188	0	0	0	0	0	0	53	2.37647	-0.453468	-0.453468	-0.453468	-0.453468	-0.453468	-0.453468	0.344335	asRNA:CR44512	CR44512	FBgn0265705
FBgn0265915	0	0	0	0	0	0	0	63	-0.353553	-0.353553	-0.353553	-0.353553	-0.353553	-0.353553	-0.353553	2.47487	asRNA:CR44704	CR44704	FBgn0265915
FBgn0266041	0	0	39	0	0	0	0	0	-0.353553	-0.353553	2.47487	-0.353553	-0.353553	-0.353553	-0.353553	-0.353553	asRNA:CR44806	CR44806	FBgn0266041
FBgn0266042	107	0	0	0	0	0	0	0	2.47487	-0.353553	-0.353553	-0.353553	-0.353553	-0.353553	-0.353553	-0.353553	asRNA:CR44807	CR44807	FBgn0266042
FBgn0266167	289	139	124	79	34	0	0	0	2.05381	0.55741	0.40777	-0.0411511	-0.490072	-0.829257	-0.829257	-0.829257	asRNA:CR44873	CR44873	FBgn0266167
FBgn0266216	0	70	118	73	0	0	0	0	-0.690257	0.790754	1.8063	0.854226	-0.690257	-0.690257	-0.690257	-0.690257	asRNA:CR44911	CR44911	FBgn0266216
FBgn0266316	0	0	46	73	40	52	88	105	-1.32842	-1.32842	-0.118374	0.591871	-0.276207	0.0394581	0.986452	1.43364	asRNA:CR44981	CR44981	FBgn0266316
FBgn0266327	0	74	0	0	0	0	0	0	-0.353553	2.47487	-0.353553	-0.353553	-0.353553	-0.353553	-0.353553	-0.353553	asRNA:CR44992	CR44992	FBgn0266327
FBgn0266361	0	72	36	0	50	0	0	0	-0.682631	1.80595	0.561658	-0.682631	1.04555	-0.682631	-0.682631	-0.682631	asRNA:CR45009	CR45009	FBgn0266361
FBgn0266384	0	0	43	0	0	0	0	0	-0.353553	-0.353553	2.47487	-0.353553	-0.353553	-0.353553	-0.353553	-0.353553	asRNA:CR45026	CR45026	FBgn0266384
FBgn0266416	0	64	124	65	0	0	0	0	-0.667862	0.683701	1.95079	0.704819	-0.667862	-0.667862	-0.667862	-0.667862	asRNA:CR45056	CR45056	FBgn0266416
FBgn0266577	0	0	0	0	0	0	0	59	-0.353553	-0.353553	-0.353553	-0.353553	-0.353553	-0.353553	-0.353553	2.47487	asRNA:CR45108	CR45108	FBgn0266577
FBgn0266619	35	36	0	0	0	0	0	0	1.58955	1.65039	-0.53999	-0.53999	-0.53999	-0.53999	-0.53999	-0.53999	asRNA:CR45126	CR45126	FBgn0266619
FBgn0266624	0	0	0	0	40	0	0	0	-0.353553	-0.353553	-0.353553	-0.353553	2.47487	-0.353553	-0.353553	-0.353553	asRNA:CR45131	CR45131	FBgn0266624
FBgn0266630	138	56	0	0	0	0	0	0	2.27659	0.635445	-0.48534	-0.48534	-0.48534	-0.48534	-0.48534	-0.48534	asRNA:CR45137	CR45137	FBgn0266630
FBgn0266636	141	0	0	0	0	0	0	0	2.47487	-0.353553	-0.353553	-0.353553	-0.353553	-0.353553	-0.353553	-0.353553	asRNA:CR45143	CR45143	FBgn0266636
FBgn0266681	0	43	0	0	0	0	0	0	-0.353553	2.47487	-0.353553	-0.353553	-0.353553	-0.353553	-0.353553	-0.353553	asRNA:CR45171	CR45171	FBgn0266681
FBgn0267495	189	66	0	0	75	75	0	0	2.08527	0.231697	-0.762905	-0.762905	0.367325	0.367325	-0.762905	-0.762905	asRNA:CR45185	CR45185	FBgn0267495
FBgn0266808	247	0	0	0	53	0	0	0	2.41753	-0.432733	-0.432733	-0.432733	0.178863	-0.432733	-0.432733	-0.432733	asRNA:CR45270	CR45270	FBgn0266808
FBgn0266819	0	41	45	0	0	0	0	0	-0.539285	1.51752	1.71819	-0.539285	-0.539285	-0.539285	-0.539285	-0.539285	asRNA:CR45281	CR45281	FBgn0266819
FBgn0267035	37	0	46	52	74	148	254	102	-0.650526	-1.11229	-0.538205	-0.463324	-0.188762	0.734767	2.05766	0.160681	asRNA:CR45479	CR45479	FBgn0267035
FBgn0267160	82	126	98	83	114	0	77	90	-0.0462879	1.11752	0.376916	-0.0198377	0.80012	-2.21521	-0.178539	0.165314	asRNA:CR45600	CR45600	FBgn0267160
FBgn0267180	0	56	0	0	0	0	80	0	-0.529187	1.21402	-0.529187	-0.529187	-0.529187	-0.529187	1.9611	-0.529187	asRNA:CR45620	CR45620	FBgn0267180
FBgn0267246	0	0	39	0	0	0	0	0	-0.353553	-0.353553	2.47487	-0.353553	-0.353553	-0.353553	-0.353553	-0.353553	asRNA:CR45686	CR45686	FBgn0267246
FBgn0267463	0	0	0	0	39	69	75	203	-0.68737	-0.68737	-0.68737	-0.68737	-0.131776	0.295605	0.381081	2.20457	asRNA:CR45813	CR45813	FBgn0267463
FBgn0267465	53	0	0	0	0	0	0	0	2.47487	-0.353553	-0.353553	-0.353553	-0.353553	-0.353553	-0.353553	-0.353553	asRNA:CR45815	CR45815	FBgn0267465
FBgn0267472	0	0	0	0	52	0	0	0	-0.353553	-0.353553	-0.353553	-0.353553	2.47487	-0.353553	-0.353553	-0.353553	asRNA:CR45822	CR45822	FBgn0267472
FBgn0267484	0	0	34	53	0	0	0	0	-0.523668	-0.523668	1.11355	2.02846	-0.523668	-0.523668	-0.523668	-0.523668	asRNA:CR45834	CR45834	FBgn0267484
FBgn0267549	389	41	0	0	0	0	0	0	2.46111	-0.0935992	-0.394585	-0.394585	-0.394585	-0.394585	-0.394585	-0.394585	asRNA:CR45889	CR45889	FBgn0267549
FBgn0267568	38	0	0	0	0	0	0	0	2.47487	-0.353553	-0.353553	-0.353553	-0.353553	-0.353553	-0.353553	-0.353553	asRNA:CR45908	CR45908	FBgn0267568
FBgn0267760	0	108	210	84	0	0	0	0	-0.643993	0.740111	2.04732	0.432532	-0.643993	-0.643993	-0.643993	-0.643993	asRNA:CR46091	CR46091	FBgn0267760
FBgn0267762	61	0	0	0	0	0	0	0	2.47487	-0.353553	-0.353553	-0.353553	-0.353553	-0.353553	-0.353553	-0.353553	asRNA:CR46093	CR46093	FBgn0267762
FBgn0004911	0	0	0	143	87	0	0	0	-0.519905	-0.519905	-0.519905	2.06606	1.05337	-0.519905	-0.519905	-0.519905	asRNA:Eig63F-2	CR32265	FBgn0004911
FBgn0026565	0	34	0	0	0	0	0	0	-0.353553	2.47487	-0.353553	-0.353553	-0.353553	-0.353553	-0.353553	-0.353553	Ass	CG1315	FBgn0026565
FBgn0015905	704	806	1016	1498	537	356	242	337	0.0405058	0.28354	0.783906	1.93236	-0.357404	-0.788671	-1.0603	-0.833942	ast	CG4426	FBgn0015905
FBgn0015591	0	115	72	0	99	516	338	202	-0.936928	-0.294623	-0.534789	-0.936928	-0.383987	1.94507	0.950892	0.191295	AstA	CG13633	FBgn0015591
FBgn0266429	0	61	0	0	0	0	0	0	-0.353553	2.47487	-0.353553	-0.353553	-0.353553	-0.353553	-0.353553	-0.353553	AstA-R1	CG2872	FBgn0266429
FBgn0039595	0	227	57	0	0	78	0	103	-0.729476	2.1194	-0.0141189	-0.729476	-0.729476	0.249434	-0.729476	0.563187	AstA-R2	CG10001	FBgn0039595
FBgn0032336	0	40	0	0	0	55	67	138	-0.763017	0.0508678	-0.763017	-0.763017	-0.763017	0.356075	0.60024	2.04489	AstC	CG14919	FBgn0032336
FBgn0036790	0	78	59	0	521	212	118	0	-0.700053	-0.257914	-0.365615	-0.700053	2.25321	0.501658	-0.0311765	-0.700053	AstC-R1	CG7285	FBgn0036790
FBgn0036789	0	74	39	0	0	68	94	144	-0.998807	0.412395	-0.255065	-0.998807	-0.998807	0.297974	0.793801	1.74732	AstC-R2	CG13702	FBgn0036789
FBgn0032337	0	76	86	0	0	418	524	218	-0.809738	-0.437332	-0.388331	-0.809738	-0.809738	1.2385	1.7579	0.258479	AstCC	CG14920	FBgn0032337
FBgn0020407	518	363	321	237	223	190	216	334	2.01011	0.579263	0.191549	-0.583879	-0.713117	-1.01775	-0.777736	0.311556	asun	CG6814	FBgn0020407
FBgn0261823	2687	1721	2230	2249	1300	1452	1552	1325	1.70361	-0.182565	0.81129	0.848389	-1.00459	-0.707805	-0.512548	-0.95578	Asx	CG8787	FBgn0261823
FBgn0031876	267	324	260	314	220	183	152	249	0.350465	1.30742	0.232944	1.13954	-0.438606	-1.05979	-1.58024	0.0482676	Atac1	CG9200	FBgn0031876
FBgn0032691	874	440	379	314	241	107	83	155	2.14573	0.452169	0.214134	-0.0395099	-0.324372	-0.847269	-0.940922	-0.659962	Atac2	CG10414	FBgn0032691
FBgn0052343	1021	609	570	713	465	255	320	245	1.88071	0.319295	0.171491	0.713439	-0.226443	-1.02231	-0.775971	-1.06021	Atac3	CG32343	FBgn0052343
FBgn0039946	359	286	265	254	157	178	110	132	1.63417	0.790356	0.547614	0.420464	-0.700773	-0.458031	-1.24405	-0.989751	ATbp	CG17172	FBgn0039946
FBgn0025720	1753	1044	1189	1155	1303	1210	1381	1261	2.18317	-1.13843	-0.459121	-0.618408	0.0749586	-0.360738	0.440382	-0.121808	Ate1	CG9204	FBgn0025720
FBgn0020762	1918	2054	2191	1509	1203	1740	2188	3552	-0.180844	0.0137735	0.209822	-0.766129	-1.20402	-0.435565	0.205529	2.15743	Atet	CG2969	FBgn0020762
FBgn0265193	537	492	782	672	529	685	558	718	-0.800889	-1.22677	1.51779	0.476748	-0.876601	0.59978	-0.602146	0.912091	Atf-2	CG44246	FBgn0265193
FBgn0028550	10719	318	190	182	614	2315	2439	2515	2.36251	-0.595355	-0.631756	-0.634032	-0.511178	-0.0274429	0.00782053	0.0294336	Atf3	CG11405	FBgn0028550
FBgn0033010	186	405	150	104	149	125	68	197	0.12664	2.26003	-0.224055	-0.672165	-0.233797	-0.467593	-1.02286	0.233797	Atf6	CG3136	FBgn0033010
FBgn0260945	2722	1701	1740	1564	1665	982	3922	2985	0.584159	-0.477334	-0.436787	-0.619768	-0.514762	-1.22485	1.83175	0.85759	Atg1	CG10967	FBgn0260945
FBgn0040780	130	142	95	0	88	52	89	83	1.01939	1.29047	0.228726	-1.91735	0.0705946	-0.742655	0.0931849	-0.0423568	Atg10	CG12821	FBgn0040780
FBgn0030960	353	358	330	249	189	278	884	1103	-0.343946	-0.328992	-0.412735	-0.654993	-0.834443	-0.568259	1.24419	1.89918	Atg101	CG7053	FBgn0030960
FBgn0036255	55	194	178	0	152	58	91	0	-0.471278	1.34838	1.13892	-1.19128	0.798554	-0.432004	0	-1.19128	Atg12	CG10861	FBgn0036255
FBgn0261108	1127	1194	1514	4342	933	2136	7916	4788	-0.751772	-0.72479	-0.595921	0.542964	-0.8299	-0.345431	1.98228	0.722575	Atg13	CG7331	FBgn0261108
FBgn0039636	1272	1125	1387	1842	1743	2609	2767	2882	-0.966084	-1.17451	-0.803032	-0.157912	-0.298279	0.929575	1.15359	1.31665	Atg14	CG11877	FBgn0039636
FBgn0039705	1056	606	1014	1097	807	931	795	818	1.00663	-1.73043	0.751172	1.25601	-0.507877	0.246336	-0.580866	-0.440971	Atg16	CG31033	FBgn0039705
FBgn0037363	2343	1874	1694	1388	1157	1372	2548	3849	0.357855	-0.175163	-0.379733	-0.727501	-0.990032	-0.745685	0.590837	2.06942	Atg17	CG1347	FBgn0037363
FBgn0035850	3294	1896	1505	2313	2211	2157	2377	3191	1.52687	-0.778275	-1.42299	-0.0906889	-0.258875	-0.347915	0.01484	1.35704	Atg18a	CG7986	FBgn0035850
FBgn0032935	315	432	323	252	359	982	1205	1475	-0.736692	-0.492433	-0.719991	-0.868217	-0.644834	0.655795	1.12135	1.68502	Atg18b	CG8678	FBgn0032935
FBgn0044452	1956	2511	2687	2405	2288	3019	6049	4813	-0.875504	-0.489866	-0.367573	-0.563519	-0.644816	-0.136884	1.9685	1.10967	Atg2	CG1241	FBgn0044452
FBgn0036813	1482	2743	2201	2207	2326	1535	1025	2004	-0.827409	1.44881	0.470452	0.481282	0.696088	-0.731739	-1.65234	0.114849	Atg3	CG6877	FBgn0036813
FBgn0031298	1809	1137	1211	2111	2576	2795	3238	4274	-0.552566	-1.18744	-1.11753	-0.267249	0.172064	0.378967	0.797495	1.77627	Atg4a	CG4428	FBgn0031298
FBgn0038325	485	528	547	537	444	422	1670	2061	-0.545344	-0.478678	-0.449221	-0.464725	-0.60891	-0.643018	1.29185	1.89805	Atg4b	CG6194	FBgn0038325
FBgn0029943	363	509	330	313	553	283	316	496	-0.30491	1.07013	-0.615705	-0.775812	1.48452	-1.05835	-0.747558	0.947692	Atg5	CG1643	FBgn0029943
FBgn0264325	839	632	734	940	1123	1303	1493	1526	-0.68636	-1.29159	-0.993358	-0.391057	0.143997	0.670279	1.2258	1.32228	Atg6	CG5429	FBgn0264325
FBgn0034366	230	742	525	470	293	196	192	193	-0.61532	1.90251	0.835385	0.564914	-0.305509	-0.78252	-0.802191	-0.797273	Atg7	CG5489	FBgn0034366
FBgn0052672	4523	5661	4157	3266	4105	6387	9364	18206	-0.49444	-0.263422	-0.56874	-0.749616	-0.579296	-0.116042	0.4883	2.28326	Atg8a	CG32672	FBgn0052672
FBgn0038539	0	826	1360	913	119	300	0	0	-0.839101	0.737016	1.75596	0.903024	-0.612033	-0.266661	-0.839101	-0.839101	Atg8b	CG12334	FBgn0038539
FBgn0034110	858	934	654	600	624	2056	3867	5512	-0.55833	-0.517138	-0.668899	-0.698167	-0.685159	0.0909886	1.07255	1.96415	Atg9	CG3615	FBgn0034110
FBgn0032422	174	0	0	172	2902	3972	7394	6200	-0.807862	-0.865763	-0.865763	-0.808528	0.0999117	0.455967	1.59468	1.19736	atilla	CG6579	FBgn0032422
FBgn0036995	104	298	719	401	1340	101	0	0	-0.578186	-0.157095	0.756716	0.0664738	2.10464	-0.584698	-0.803926	-0.803926	atk	CG5195	FBgn0036995
FBgn0039213	6663	2721	3603	5306	5180	7434	7141	6497	0.644456	-1.67585	-1.15669	-0.15429	-0.228455	1.09827	0.925812	0.546746	atl	CG6668	FBgn0039213
FBgn0010750	3225	1814	1830	2224	1843	1114	1004	1267	2.0006	0.0332881	0.0555963	0.604937	0.0737218	-0.942698	-1.09607	-0.729375	atms	CG2503	FBgn0010750
FBgn0010433	330	0	0	0	0	0	0	0	2.47487	-0.353553	-0.353553	-0.353553	-0.353553	-0.353553	-0.353553	-0.353553	ato	CG7508	FBgn0010433
FBgn0052446	886	1314	1291	1916	1682	1929	2218	3075	-1.34082	-0.705215	-0.739371	0.188787	-0.158715	0.208093	0.637273	1.90996	Atox1	CG32446	FBgn0052446
FBgn0037671	3578	2504	2724	2879	4401	10802	19805	30533	-0.586982	-0.690751	-0.669495	-0.654519	-0.507465	0.110991	0.980848	2.01737	ATP6AP2	CG8444	FBgn0037671
FBgn0030343	798	1382	2279	2180	2763	2178	2112	2592	-1.92139	-1.01465	0.378067	0.224356	1.12954	0.221251	0.118777	0.864042	ATP7	CG1886	FBgn0030343
FBgn0259221	667	1278	2362	1613	2302	4805	4998	2703	-1.22648	-0.836988	-0.145979	-0.623438	-0.184227	1.41134	1.53437	0.0713958	ATP8A	CG42321	FBgn0259221
FBgn0037989	623	252	325	393	326	779	2975	2557	-0.37157	-0.711316	-0.644466	-0.582194	-0.64355	-0.228711	1.7823	1.39951	ATP8B	CG14741	FBgn0037989
FBgn0002921	21263	12996	11487	8649	20643	63931	109000	94190	-0.531544	-0.735863	-0.773158	-0.8433	-0.546867	0.522999	1.63688	1.27085	Atpalpha	CG5670	FBgn0002921
FBgn0020236	5642	4663	5500	6620	5702	4947	9256	13095	-0.447589	-0.788295	-0.497007	-0.107232	-0.426708	-0.689459	0.810133	2.14616	ATPCL	CG8322	FBgn0020236
FBgn0019644	10567	6560	10574	48391	120313	419732	651072	768251	-0.777034	-0.789801	-0.777012	-0.656514	-0.427348	0.526697	1.26382	1.63719	ATPsynB	CG8189	FBgn0019644
FBgn0010217	12386	18840	31156	59855	323595	890268	1287958	497986	-0.792657	-0.779118	-0.753283	-0.693081	-0.139834	1.04888	1.88311	0.225986	ATPsynbeta	CG11154	FBgn0010217
FBgn0036568	225	666	1400	730	117	227	0	0	-0.404541	0.507421	2.02529	0.63977	-0.627879	-0.400405	-0.869828	-0.869828	ATPsynbetaL	CG5389	FBgn0036568
FBgn0039830	50705	32644	58670	195694	720404	2205263	3347934	3686880	-0.794131	-0.80573	-0.789016	-0.701018	-0.364047	0.589537	1.32337	1.54104	ATPsynC	CG1746	FBgn0039830
FBgn0016119	7524	4802	6162	21183	96311	316578	438528	640485	-0.751418	-0.762539	-0.756983	-0.695614	-0.388678	0.511226	1.00945	1.83455	ATPsynCF6	CG4412	FBgn0016119
FBgn0035585	0	743	924	665	90	154	0	0	-0.831244	1.08681	1.55407	0.885456	-0.598909	-0.433693	-0.831244	-0.831244	ATPsynCF6L	CG12027	FBgn0035585
FBgn0016120	13863	7071	9757	41387	122080	412030	609961	821659	-0.753741	-0.774995	-0.76659	-0.667609	-0.415094	0.492257	1.11165	1.77412	ATPsynD	CG6030	FBgn0016120
FBgn0028342	7361	4236	5840	27383	76242	279964	376359	504691	-0.770092	-0.785831	-0.777753	-0.669249	-0.423164	0.602906	1.08841	1.73477	ATPsyndelta	CG2968	FBgn0028342
FBgn0038224	6440	3776	5034	23050	61439	207666	326250	442307	-0.748517	-0.764089	-0.756736	-0.651427	-0.427033	0.427703	1.12086	1.79924	ATPsynE	CG3321	FBgn0038224
FBgn0051477	125	243	289	231	137	0	0	60	-0.0954308	0.964412	1.37757	0.856632	0.0123499	-1.21815	-1.21815	-0.679243	ATPsynepsilonL	CG31477	FBgn0051477
FBgn0035032	9825	5917	10361	34392	119415	348671	587245	650073	-0.777656	-0.792065	-0.77568	-0.687075	-0.373586	0.471705	1.35135	1.58301	ATPsynF	CG4692	FBgn0035032
FBgn0010612	9893	4869	7160	29828	78007	212606	295678	471971	-0.746609	-0.775718	-0.762444	-0.631105	-0.351955	0.427915	0.909236	1.93068	ATPsynG	CG6105	FBgn0010612
FBgn0020235	13389	7810	13071	55765	151554	527814	793099	829546	-0.793471	-0.80897	-0.794355	-0.675747	-0.409636	0.63565	1.37264	1.47389	ATPsyngamma	CG7610	FBgn0020235
FBgn0031941	0	589	983	586	122	185	0	0	-0.838084	0.763965	1.83562	0.755805	-0.50625	-0.334894	-0.838084	-0.838084	ATPsynGL	CG7211	FBgn0031941
FBgn0016691	8115	4778	6981	31259	94073	274235	406287	483152	-0.792434	-0.80944	-0.798213	-0.674488	-0.354375	0.563768	1.23673	1.62845	ATPsynO	CG4307	FBgn0016691
FBgn0012042	0	3030	394	354	142	0	0	285	-0.512867	2.44359	-0.12843	-0.167459	-0.374314	-0.512867	-0.512867	-0.234785	AttA	CG10146	FBgn0012042
FBgn0041581	51	1148	224	171	60	0	0	302	-0.507785	2.37097	-0.0537963	-0.19288	-0.484167	-0.64162	-0.64162	0.150892	AttB	CG18372	FBgn0041581
FBgn0041579	0	459	147	103	37	0	0	436	-0.767045	1.61586	-0.00389363	-0.23232	-0.574959	-0.767045	-0.767045	1.49645	AttC	CG4740	FBgn0041579
FBgn0038530	0	1210	815	1254	475	53	0	63	-0.891491	1.33839	0.610453	1.41948	-0.0161252	-0.793819	-0.891491	-0.77539	AttD	CG7629	FBgn0038530
FBgn0019637	5135	2165	1767	2067	1582	964	1105	1055	2.32833	0.136526	-0.15719	0.0642043	-0.293716	-0.749789	-0.645733	-0.682632	Atu	CG1433	FBgn0019637
FBgn0029907	77	38	43	0	0	0	0	0	1.93913	0.61815	0.787506	-0.668956	-0.668956	-0.668956	-0.668956	-0.668956	Atx-1	CG4547	FBgn0029907
FBgn0041188	7746	5605	5570	7992	9359	9419	11214	7589	-0.163727	-1.27391	-1.29206	-0.0361677	0.672668	0.70378	1.63455	-0.245137	Atx2	CG5166	FBgn0041188
FBgn0031420	1889	1290	1582	1778	1313	3063	2819	1936	-0.106481	-1.02092	-0.575149	-0.275934	-0.985806	1.68576	1.31326	-0.0347303	Atxn7	CG9866	FBgn0031420
FBgn0000146	199	194	347	123	60	0	0	0	0.667449	0.627542	1.8487	0.0608586	-0.441973	-0.92086	-0.92086	-0.92086	aub	CG6137	FBgn0000146
FBgn0000147	666	774	975	490	154	96	0	0	0.710863	0.993507	1.51954	0.250258	-0.629079	-0.780869	-1.03211	-1.03211	aurA	CG3068	FBgn0000147
FBgn0024227	3150	1835	536	182	68	84	56	0	2.09663	0.953154	-0.176413	-0.48424	-0.58337	-0.569457	-0.593805	-0.642501	aurB	CG6620	FBgn0024227
FBgn0032104	0	111	210	118	0	0	0	0	-0.675064	0.690441	1.90832	0.776554	-0.675064	-0.675064	-0.675064	-0.675064	aust	CG17009	FBgn0032104
FBgn0037218	1932	1757	2117	1799	1829	1603	1765	2307	0.192648	-0.584607	1.01432	-0.398066	-0.264822	-1.26859	-0.549075	1.85819	aux	CG1107	FBgn0037218
FBgn0050476	191	245	260	259	207	266	189	275	-1.29211	0.241384	0.667355	0.638957	-0.837744	0.837744	-1.34891	1.09333	ave	CG30476	FBgn0050476
FBgn0030410	170	168	214	321	332	127	146	209	-0.530449	-0.556404	0.0405542	1.42913	1.57188	-1.08847	-0.841905	-0.0243325	Aven	CG15727	FBgn0030410
FBgn0000150	81781	33107	25240	62108	57127	63743	80122	89264	0.882526	-1.24196	-1.58533	0.0238532	-0.193554	0.0952165	0.810115	1.20914	awd	CG2210	FBgn0000150
FBgn0013751	83	108	151	77	57	60	250	520	-0.509254	-0.350608	-0.0777367	-0.54733	-0.674247	-0.655209	0.550502	2.26388	Awh	CG1072	FBgn0013751
FBgn0035708	0	631	1348	8940	1171	510	1811	2021	-0.717394	-0.497007	-0.246582	2.40505	-0.308403	-0.539268	-0.0848718	-0.0115258	axed	CG8398	FBgn0035708
FBgn0026597	3848	2241	2622	2920	1760	1394	1616	1763	1.9151	-0.0358133	0.426724	0.788499	-0.619752	-1.06408	-0.794569	-0.61611	Axn	CG7926	FBgn0026597
FBgn0262870	52	478	642	345	211	1076	3127	3070	-0.854488	-0.515281	-0.384694	-0.621183	-0.727882	-0.0391163	1.59402	1.54863	axo	CG43225	FBgn0262870
FBgn0000152	379	130	114	79	86	86	84	126	2.42429	-0.054758	-0.214054	-0.562514	-0.492822	-0.492822	-0.512734	-0.0945821	Axs	CG9703	FBgn0000152
FBgn0261647	2594	1098	1195	1241	955	670	706	831	2.32228	-0.102519	0.0547039	0.129263	-0.334302	-0.796246	-0.737895	-0.535288	Axud1	CG4272	FBgn0261647
FBgn0025185	708	320	245	116	186	126	102	97	2.28734	0.401075	0.0364613	-0.590673	-0.250368	-0.542058	-0.658735	-0.683042	az2	CG1605	FBgn0025185
FBgn0033238	0	251	524	329	73	133	0	0	-0.859087	0.457742	1.88999	0.866956	-0.476105	-0.161325	-0.859087	-0.859087	azot	CG11165	FBgn0033238
FBgn0000153	550	136	127	176	527	3634	8903	20514	-0.52251	-0.579876	-0.581123	-0.574334	-0.525697	-0.0951767	0.634921	2.2438	b	CG7811	FBgn0000153
FBgn0011758	91	69	76	93	143	0	0	0	0.59765	0.186766	0.317502	0.635003	1.56883	-1.10192	-1.10192	-1.10192	B-H1	CG5529	FBgn0011758
FBgn0004854	106	149	220	193	121	0	0	0	0.08252	0.563653	1.35808	1.05598	0.250357	-1.10353	-1.10353	-1.10353	B-H2	CG5488	FBgn0004854
FBgn0023407	4363	2130	2434	2412	1525	1890	2991	3306	1.91978	-0.555853	-0.218821	-0.243212	-1.22659	-0.82193	0.398701	0.747927	B4	CG9239	FBgn0023407
FBgn0004587	26056	16328	13717	18359	9802	4094	4574	4295	1.75091	0.525777	0.196952	0.781558	-0.296097	-1.01495	-0.954503	-0.98964	B52	CG10851	FBgn0004587
FBgn0024897	77	83	88	0	7325	582	240	130	-0.389897	-0.387531	-0.385559	-0.420265	2.46859	-0.190734	-0.325613	-0.368995	b6	CG3100	FBgn0024897
FBgn0038342	0	427	723	421	67	139	0	0	-0.821806	0.757985	1.85311	0.735787	-0.573923	-0.307541	-0.821806	-0.821806	B9d1	CG14870	FBgn0038342
FBgn0004870	307	365	288	183	79	69	128	148	1.00105	1.52353	0.829888	-0.115982	-1.05284	-1.14293	-0.611437	-0.431272	bab1	CG9097	FBgn0004870
FBgn0025525	1981	1845	1280	714	482	658	1147	1641	1.33827	1.09958	0.107939	-0.885453	-1.29264	-0.98374	-0.12549	0.741534	bab2	CG9102	FBgn0025525
FBgn0011300	2509	2213	2114	1980	1861	1896	1623	1759	1.83939	0.781416	0.427567	-0.0513796	-0.476713	-0.351615	-1.32738	-0.841285	babo	CG8224	FBgn0011300
FBgn0034724	17507	3768	1324	996	4262	1913	1474	7039	2.30199	-0.184095	-0.62634	-0.685692	-0.0947054	-0.51976	-0.599198	0.407796	babos	CG3624	FBgn0034724
FBgn0031453	44200	26088	13457	19581	17649	8917	10463	15547	2.17611	0.581205	-0.531056	0.00821141	-0.161917	-0.930839	-0.794702	-0.347015	Bacc	CG9894	FBgn0031453
FBgn0032049	0	0	0	0	0	0	0	345	-0.353553	-0.353553	-0.353553	-0.353553	-0.353553	-0.353553	-0.353553	2.47487	Bace	CG13095	FBgn0032049
FBgn0031977	5443	2062	998	465	523	526	801	876	2.35795	0.355506	-0.274662	-0.590338	-0.555987	-0.55421	-0.391338	-0.346918	baf	CG7380	FBgn0031977
FBgn0045866	4060	2789	2421	2007	3551	1999	2325	3659	1.50605	-0.0777245	-0.536283	-1.05216	0.871791	-1.06213	-0.655907	1.00637	bai	CG11785	FBgn0045866
FBgn0260960	2586	1148	707	949	1883	4587	4990	7379	-0.185253	-0.787104	-0.971677	-0.870392	-0.479482	0.652231	0.8209	1.82078	Baldspot	CG3971	FBgn0260960
FBgn0027889	4939	2350	1693	1053	414	189	139	146	2.15638	0.594136	0.197694	-0.188491	-0.574073	-0.709841	-0.740012	-0.735788	ball	CG6386	FBgn0027889
FBgn0000158	174	121	108	0	0	0	0	0	1.71721	0.981013	0.800437	-0.699731	-0.699731	-0.699731	-0.699731	-0.699731	bam	CG10422	FBgn0000158
FBgn0004862	0	0	0	0	0	65	79	217	-0.587727	-0.587727	-0.587727	-0.587727	-0.587727	0.258861	0.441203	2.23857	bap	CG7902	FBgn0004862
FBgn0030093	5474	2734	2591	2471	1095	1000	659	807	2.09393	0.391511	0.302661	0.228103	-0.626836	-0.685862	-0.897733	-0.805777	Bap111	CG7055	FBgn0030093
FBgn0042085	4511	3018	2479	1858	1056	860	723	875	1.92705	0.815564	0.414296	-0.0480182	-0.645081	-0.790997	-0.892989	-0.77983	Bap170	CG3274	FBgn0042085
FBgn0025716	3760	2117	1171	795	643	281	281	523	2.14307	0.769598	-0.0212123	-0.33553	-0.462595	-0.765209	-0.765209	-0.562909	Bap55	CG6546	FBgn0025716
FBgn0025463	8826	3616	2310	2438	1395	884	862	1130	2.31187	0.351247	-0.140226	-0.0920572	-0.484559	-0.676858	-0.685137	-0.584283	Bap60	CG4303	FBgn0025463
FBgn0037081	1484	1114	1265	1632	1701	1904	1773	1418	-0.196721	-1.58645	-1.01929	0.359169	0.618333	1.3808	0.888766	-0.444618	barc	CG6049	FBgn0037081
FBgn0031571	7549	1736	1759	1218	1916	1234	1243	1241	2.45307	-0.23136	-0.220739	-0.470571	-0.148237	-0.463183	-0.459026	-0.45995	bark	CG3921	FBgn0031571
FBgn0014127	2248	2350	2161	1461	957	363	234	230	1.07512	1.18506	0.981351	0.22688	-0.316339	-0.956562	-1.0956	-1.09991	barr	CG10726	FBgn0014127
FBgn0000163	5616	1565	1451	1621	1551	1401	2384	6346	1.41445	-0.57918	-0.635283	-0.55162	-0.58607	-0.65989	-0.176122	1.77371	baz	CG5055	FBgn0000163
FBgn0039071	0	1150	2712	1593	287	640	0	72	-0.836851	0.356057	1.97634	0.815586	-0.539143	-0.172972	-0.836851	-0.762165	bb8	CG4434	FBgn0039071
FBgn0033844	1994	2059	1774	2388	2058	4934	6231	4244	-0.718894	-0.680475	-0.848931	-0.486011	-0.681066	1.01886	1.78549	0.611023	bbc	CG6016	FBgn0033844
FBgn0034512	0	2552	1723	1041	1239	484	1875	4123	-1.26572	0.716401	0.0725236	-0.45718	-0.303395	-0.889797	0.190581	1.93658	Bbd	CG18067	FBgn0034512
FBgn0087007	14489	7997	22740	92673	9891	3725	3769	7228	-0.194846	-0.412003	0.0811495	2.4204	-0.348648	-0.554901	-0.553429	-0.437726	bbg	CG42230	FBgn0087007
FBgn0035741	0	0	76	0	0	0	0	0	-0.353553	-0.353553	2.47487	-0.353553	-0.353553	-0.353553	-0.353553	-0.353553	BBS1	CG14825	FBgn0035741
FBgn0031255	488	52	61	0	0	0	0	0	2.44616	-0.137009	-0.0836863	-0.445093	-0.445093	-0.445093	-0.445093	-0.445093	BBS8	CG13691	FBgn0031255
FBgn0034622	0	0	0	0	41	0	0	0	-0.353553	-0.353553	-0.353553	-0.353553	2.47487	-0.353553	-0.353553	-0.353553	BBS9	CG15666	FBgn0034622
FBgn0040239	382	512	513	446	1026	2683	3069	3461	-0.854117	-0.755812	-0.755056	-0.80572	-0.36713	0.885877	1.17777	1.47419	bc10	CG4867	FBgn0040239
FBgn0039558	1826	1161	863	1779	1130	764	737	904	1.5698	0.0357559	-0.65168	1.46138	-0.0357559	-0.880056	-0.942341	-0.5571	BCAS2	CG4980	FBgn0039558
FBgn0043362	764	979	1212	1231	784	1789	1862	1341	-1.16148	-0.642583	-0.0802474	-0.0343918	-1.11321	1.31232	1.4885	0.231088	bchs	CG14001	FBgn0043362
FBgn0026149	993	800	583	600	308	199	213	181	1.65607	1.02736	0.320464	0.375843	-0.57537	-0.930446	-0.88484	-0.989082	BCL7-like	CG17252	FBgn0026149
FBgn0013432	885	684	1039	1870	5870	6089	5090	3054	-0.950665	-1.03801	-0.883742	-0.522618	1.21564	1.31081	0.87668	-0.00809377	bcn92	CG3717	FBgn0013432
FBgn0038857	572	575	566	594	1041	1012	929	979	-0.946763	-0.933334	-0.973622	-0.848282	1.15268	1.02286	0.651319	0.875141	Bdbt	CG17282	FBgn0038857
FBgn0034049	4232	1658	1956	2306	1062	974	1023	1223	2.21905	-0.133678	0.138705	0.458618	-0.678443	-0.758879	-0.714091	-0.531284	bdg	CG8291	FBgn0034049
FBgn0028482	71	239	344	598	2009	6553	9420	10641	-0.825313	-0.787465	-0.763809	-0.706586	-0.388706	0.635001	1.2809	1.55598	bdl	CG16857	FBgn0028482
FBgn0032512	2503	1015	1460	2618	1343	736	625	460	1.40485	-0.400347	0.139515	1.54437	-0.00242634	-0.738822	-0.873484	-1.07366	Bdp1	CG9305	FBgn0032512
FBgn0052594	1977	1615	1341	1730	710	791	1021	798	1.49752	0.754022	0.191265	0.990216	-1.10472	-0.938356	-0.465969	-0.923979	be	CG32594	FBgn0052594
FBgn0015602	2598	1819	1301	1508	1076	845	876	815	2.02228	0.755152	-0.0874301	0.249278	-0.453417	-0.829163	-0.778738	-0.877961	BEAF-32	CG10159	FBgn0015602
FBgn0037660	1799	1088	1483	2652	1678	1507	1443	1680	0.29342	-1.27812	-0.405041	2.17882	0.0259713	-0.351993	-0.493454	0.0303919	beag	CG18005	FBgn0037660
FBgn0013433	0	190	157	0	0	179	173	88	-1.13012	1.05258	0.673476	-1.13012	-1.13012	0.92621	0.857282	-0.119187	beat-Ia	CG4846	FBgn0013433
FBgn0028645	0	73	77	0	0	100	101	0	-0.916028	0.608075	0.691588	-0.916028	-0.916028	1.17178	1.19266	-0.916028	beat-Ib	CG7644	FBgn0028645
FBgn0028644	0	125	111	0	0	108	164	68	-1.10614	0.814243	0.59916	-1.10614	-1.10614	0.553071	1.4134	-0.0614523	beat-Ic	CG4838	FBgn0028644
FBgn0038498	0	503	307	134	81	347	502	218	-1.39876	1.29178	0.24338	-0.681998	-0.965495	0.45734	1.28644	-0.232682	beat-IIa	CG14334	FBgn0038498
FBgn0038494	0	283	259	143	105	149	175	83	-1.62622	1.44961	1.18876	-0.0720049	-0.485014	-0.00679291	0.275792	-0.724124	beat-IIb	CG4135	FBgn0038494
FBgn0053179	48	110	90	0	36	143	237	85	-0.623208	0.223672	-0.0495151	-1.27886	-0.78712	0.67443	1.95841	-0.117812	beat-IIIb	CG33179	FBgn0053179
FBgn0032629	498	893	362	182	348	263	339	290	0.459634	2.25499	-0.158514	-0.976651	-0.222147	-0.60849	-0.263054	-0.485769	beat-IIIc	CG15138	FBgn0032629
FBgn0039089	0	205	178	87	51	173	200	93	-1.61828	1.07066	0.716504	-0.477123	-0.949327	0.65092	1.00507	-0.398422	beat-IV	CG10152	FBgn0039089
FBgn0038087	0	85	48	0	0	52	74	0	-0.887075	1.44193	0.428125	-0.887075	-0.887075	0.537725	1.14053	-0.887075	beat-Va	CG10134	FBgn0038087
FBgn0038092	0	110	83	0	0	87	80	0	-0.919709	1.32847	0.776643	-0.919709	-0.919709	0.858395	0.715329	-0.919709	beat-Vb	CG31298	FBgn0038092
FBgn0038084	0	82	57	0	0	84	69	52	-1.15501	1.04757	0.376051	-1.15501	-1.15501	1.10129	0.69838	0.241747	beat-Vc	CG14390	FBgn0038084
FBgn0039584	0	443	264	116	60	373	511	221	-1.34747	1.05466	0.0840475	-0.71847	-1.02213	0.675091	1.42338	-0.149117	beat-VI	CG14064	FBgn0039584
FBgn0250908	0	190	82	0	0	203	319	181	-1.02107	0.570755	-0.334075	-1.02107	-1.02107	0.679669	1.65152	0.495352	beat-VII	CG42242	FBgn0250908
FBgn0036691	409	599	635	2068	4531	6050	4836	3395	-1.09444	-1.00803	-0.991656	-0.339914	0.780283	1.47114	0.919	0.263619	beg	CG7842	FBgn0036691
FBgn0263231	13488	8835	10511	14915	10575	14312	15460	15065	0.233115	-1.59642	-0.937425	0.794204	-0.912261	0.557108	1.0085	0.853183	bel	CG9748	FBgn0263231
FBgn0025109	275	332	457	476	496	640	941	1180	-1.04279	-0.859691	-0.458154	-0.39712	-0.332874	0.129697	1.0966	1.86434	Bem46	CG18642	FBgn0025109
FBgn0000173	13957	8060	4682	4980	6076	7405	6855	6696	2.27594	0.247992	-0.913688	-0.811207	-0.434297	0.0227401	-0.166402	-0.221082	ben	CG18319	FBgn0000173
FBgn0040238	3347	1743	1969	3032	11435	990	1357	1400	0.0545571	-0.411229	-0.345601	-0.0369159	2.40323	-0.629893	-0.52332	-0.510833	Best1	CG6264	FBgn0040238
FBgn0035696	3208	477	460	284	867	727	1405	1808	2.1035	-0.693995	-0.711409	-0.891694	-0.2945	-0.437908	0.256599	0.669411	Best2	CG10173	FBgn0035696
FBgn0036492	0	174	292	141	0	0	0	0	-0.671528	0.868451	1.9128	0.576386	-0.671528	-0.671528	-0.671528	-0.671528	Best3	CG12327	FBgn0036492
FBgn0036491	0	118	162	90	0	0	0	0	-0.693256	1.07548	1.73501	0.655782	-0.693256	-0.693256	-0.693256	-0.693256	Best4	CG7259	FBgn0036491
FBgn0260857	955	561	679	923	932	751	781	1162	0.59581	-1.50016	-0.872436	0.425578	0.473456	-0.489415	-0.329823	1.69699	Bet1	CG14084	FBgn0260857
FBgn0260859	311	233	207	215	314	355	263	355	0.487672	-0.807254	-1.2389	-1.10608	0.537477	1.21814	-0.309205	1.21814	Bet3	CG3911	FBgn0260859
FBgn0260860	439	543	318	203	463	430	427	442	0.299608	1.30882	-0.874565	-1.99052	0.532502	0.212273	0.183161	0.32872	Bet5	CG1359	FBgn0260860
FBgn0037215	5079	2436	2281	1338	1027	753	1221	1714	2.24112	0.329074	0.216941	-0.465261	-0.69025	-0.888472	-0.549903	-0.193248	beta-Man	CG12582	FBgn0037215
FBgn0039175	4004	2205	2264	4669	4165	2549	2038	1833	0.925573	-0.678382	-0.625779	1.51848	1.06912	-0.371678	-0.827276	-1.01005	beta-PheRS	CG5706	FBgn0039175
FBgn0250788	30094	12430	24647	67690	45514	47823	47596	32467	-0.493169	-1.52549	-0.811502	1.70401	0.408005	0.542947	0.529681	-0.354487	beta-Spec	CG5870	FBgn0250788
FBgn0025724	6707	3435	3035	3347	4213	2052	2681	5587	1.81312	-0.286983	-0.543719	-0.343465	0.212369	-1.17465	-0.770931	1.09426	beta'COP	CG6699	FBgn0025724
FBgn0033315	301	233	156	201	189	195	250	274	1.57278	0.167867	-1.423	-0.493271	-0.741197	-0.617234	0.519096	1.01495	beta3GalTII	CG8734	FBgn0033315
FBgn0027538	190	322	267	201	340	429	414	674	-1.05416	-0.208912	-0.5611	-0.983726	-0.09365	0.476254	0.380203	2.04509	beta4GalNAcTA	CG8536	FBgn0027538
FBgn0039258	561	436	718	1215	1291	351	318	209	-0.185919	-0.490206	0.196265	1.40611	1.59112	-0.697121	-0.777453	-1.04279	beta4GalT7	CG11780	FBgn0039258
FBgn0008635	8414	3884	3837	5411	5379	4652	5296	8817	1.42174	-0.961194	-0.985917	-0.157941	-0.174774	-0.5572	-0.218435	1.63373	betaCOP	CG6223	FBgn0008635
FBgn0015000	839	545	554	865	916	595	2238	3395	-0.39287	-0.678505	-0.669761	-0.36761	-0.318061	-0.629928	0.966327	2.09041	betaggt-I	CG3469	FBgn0015000
FBgn0028970	450	419	434	552	719	892	1299	1624	-0.777854	-0.847022	-0.813554	-0.550271	-0.17766	0.208339	1.11644	1.84158	betaggt-II	CG18627	FBgn0028970
FBgn0039874	1038	557	570	400	884	438	508	470	1.87912	-0.223484	-0.166657	-0.909783	1.20594	-0.743672	-0.437679	-0.60379	betaGlu	CG2135	FBgn0270927
FBgn0030538	0	92	199	93	0	0	0	0	-0.649072	0.594983	2.04187	0.608505	-0.649072	-0.649072	-0.649072	-0.649072	betaNACtes1	CG13402	FBgn0030538
FBgn0030563	0	39	64	0	0	0	0	0	-0.520024	1.05519	2.06495	-0.520024	-0.520024	-0.520024	-0.520024	-0.520024	betaNACtes2	CG18157	FBgn0030563
FBgn0030566	0	137	269	122	0	0	0	0	-0.654571	0.70416	2.0133	0.555393	-0.654571	-0.654571	-0.654571	-0.654571	betaNACtes4	CG18313	FBgn0030566
FBgn0052598	0	67	121	0	0	0	0	0	-0.512603	0.948861	2.12676	-0.512603	-0.512603	-0.512603	-0.512603	-0.512603	betaNACtes6	CG32598	FBgn0052598
FBgn0010357	89	0	0	0	0	0	294	14061	-0.346556	-0.364524	-0.364524	-0.364524	-0.364524	-0.364524	-0.305167	2.47434	betaTry	CG18211	FBgn0010357
FBgn0003887	225006	137025	174806	279165	118734	46690	30014	18413	1.01614	0.0875333	0.486297	1.58777	-0.105521	-0.865917	-1.04193	-1.16437	betaTub56D	CG9277	FBgn0284243
FBgn0003888	15477	59172	273926	675983	60540	8530	3313	1292	-0.516878	-0.331454	0.579873	2.28604	-0.325649	-0.546358	-0.568497	-0.577073	betaTub60D	CG3401	FBgn0003888
FBgn0003889	0	7911	17951	12536	1977	4313	157	605	-0.858347	0.33688	1.85377	1.03564	-0.559654	-0.206721	-0.834627	-0.766941	betaTub85D	CG9359	FBgn0003889
FBgn0003890	598	419	2031	9165	26023	33006	40432	41271	-1.02861	-1.03855	-0.949019	-0.552797	0.383497	0.771333	1.18377	1.23037	betaTub97EF	CG4869	FBgn0003890
FBgn0047334	0	0	0	0	0	0	0	99	-0.353553	-0.353553	-0.353553	-0.353553	-0.353553	-0.353553	-0.353553	2.47487	BG642312	CG33943	FBgn0047334
FBgn0013753	1866	1559	1089	1113	703	427	374	386	1.63784	1.09506	0.264097	0.306529	-0.418356	-0.906328	-1.00003	-0.978816	Bgb	CG7959	FBgn0013753
FBgn0004581	55	334	992	580	70	164	0	0	-0.624211	0.169657	2.04194	0.869628	-0.58153	-0.314062	-0.780709	-0.780709	bgcn	CG30170	FBgn0004581
FBgn0027348	38	82	182	581	611	3162	1423	1313	-0.846468	-0.804431	-0.708893	-0.327696	-0.299034	2.13814	0.476735	0.371643	bgm	CG4501	FBgn0027348
FBgn0261111	615	635	502	596	1024	1508	1776	1976	-0.783323	-0.749559	-0.974089	-0.815399	-0.0928508	0.724236	1.17667	1.51431	BHD	CG8616	FBgn0261111
FBgn0000179	12814	1877	1002	409	308	88	137	107	2.45053	-0.0493134	-0.24931	-0.38485	-0.407936	-0.458221	-0.447021	-0.453878	bi	CG3578	FBgn0000179
FBgn0035871	1922	2476	3063	2496	3245	3608	4377	4847	-1.34044	-0.783034	-0.192426	-0.762911	-0.00930686	0.355925	1.12965	1.60254	BI-1	CG7188	FBgn0035871
FBgn0000180	4969	1327	653	246	115	67	66	0	2.38713	0.234435	-0.163949	-0.404517	-0.481948	-0.510319	-0.51091	-0.549921	bib	CG4722	FBgn0000180
FBgn0000181	66486	22547	19086	20714	13551	13012	17497	21948	2.42234	-0.103959	-0.302952	-0.209349	-0.62119	-0.65218	-0.394312	-0.138399	bic	CG3644	FBgn0000181
FBgn0000183	4276	2052	2614	6067	3503	2451	2488	2834	0.747926	-0.931627	-0.507208	2.10048	0.164161	-0.630305	-0.602362	-0.341065	BicD	CG6605	FBgn0000183
FBgn0014133	9411	5551	3677	2777	1968	1550	2529	3693	2.16173	0.649126	-0.0852308	-0.43791	-0.754929	-0.918729	-0.535093	-0.078961	bif	CG1822	FBgn0014133
FBgn0038252	0	374	597	271	47	70	0	0	-0.764111	0.91817	1.92124	0.454868	-0.552701	-0.449245	-0.764111	-0.764111	BigH1	CG3509	FBgn0038252
FBgn0039509	741	572	479	797	590	820	1007	1307	-0.179714	-0.810814	-1.15811	0.0294078	-0.743596	0.115297	0.813615	1.93391	bigmax	CG3350	FBgn0039509
FBgn0039282	0	179	197	68	45	131	158	75	-1.52326	1.03396	1.29111	-0.551803	-0.880384	0.348225	0.733951	-0.4518	Bili	CG11848	FBgn0039282
FBgn0045759	0	68	53	0	0	50	0	124	-0.812147	0.685507	0.355142	-0.812147	-0.812147	0.289069	-0.812147	1.91887	bin	CG18647	FBgn0045759
FBgn0024491	1454	1327	1136	1174	1443	431	269	250	0.983541	0.742635	0.380328	0.45241	0.962676	-0.956985	-1.26428	-1.30032	Bin1	CG6046	FBgn0024491
FBgn0263144	5826	3869	3656	5017	3220	3243	2763	2467	1.8145	0.0977049	-0.0891516	1.1048	-0.471637	-0.45146	-0.872545	-1.13221	bin3	CG8276	FBgn0263144
FBgn0026263	887	2048	1217	381	102	0	0	0	0.410437	1.95946	0.850726	-0.264674	-0.636919	-0.773008	-0.773008	-0.773008	bip1	CG7574	FBgn0026263
FBgn0010520	423	367	310	897	590	481	369	434	-0.325241	-0.624437	-0.928975	2.20723	0.567002	-0.0153605	-0.613751	-0.266471	Bka	CG4539	FBgn0010520
FBgn0035608	0	547	438	202	0	51	0	0	-0.699214	1.77232	1.27982	0.213492	-0.699214	-0.468778	-0.699214	-0.699214	blanks	CG10630	FBgn0035608
FBgn0035625	1133	1178	1653	2756	522	0	17904	9061	-0.506368	-0.499118	-0.422588	-0.244876	-0.60481	-0.688913	2.19571	0.770961	Blimp-1	CG5249	FBgn0035625
FBgn0002906	559	696	915	641	383	349	218	209	0.25184	0.801675	1.68061	0.580938	-0.454516	-0.590972	-1.11673	-1.15285	Blm	CG6920	FBgn0002906
FBgn0050077	506	464	410	654	948	754	681	914	-0.800333	-1.00993	-1.27941	-0.061756	1.40542	0.437283	0.0729844	1.23574	Blos1	CG30077	FBgn0050077
FBgn0036118	127	175	182	98	320	192	218	327	-0.946275	-0.363017	-0.277959	-1.29866	1.39891	-0.156447	0.159485	1.48397	Blos2	CG14145	FBgn0036118
FBgn0085284	121	270	172	145	328	305	294	170	-1.27899	0.542463	-0.65554	-0.985602	1.25149	0.970321	0.835852	-0.679989	Blos3	CG34255	FBgn0085284
FBgn0036105	83	115	84	57	109	100	92	108	-0.556722	1.13996	-0.503701	-1.93527	0.821828	0.344638	-0.0795318	0.768807	Blos4	CG14149	FBgn0036105
FBgn0027660	9621	834	988	1975	931	4729	3648	1068	2.18047	-0.70211	-0.65159	-0.327804	-0.670289	0.575647	0.221024	-0.625346	blot	CG3897	FBgn0027660
FBgn0004133	11285	3819	4104	2152	1335	514	1284	873	2.29587	0.183418	0.264057	-0.288248	-0.519413	-0.751709	-0.533843	-0.650133	blow	CG1363	FBgn0004133
FBgn0038387	460	366	536	1590	3094	3729	3552	3195	-1.08431	-1.1478	-1.03297	-0.32102	0.694895	1.12382	1.00426	0.763118	blp	CG5268	FBgn0038387
FBgn0011211	40735	23630	45022	207611	623888	2561283	3428290	3749701	-0.795031	-0.805538	-0.792398	-0.692525	-0.436822	0.753248	1.28582	1.48325	blw	CG3612	FBgn0011211
FBgn0085385	0	199	94	56	0	130	136	73	-1.25008	1.64254	0.116286	-0.436073	-1.25008	0.639574	0.726789	-0.188965	bma	CG34356	FBgn0085385
FBgn0036199	446	370	369	767	616	339	427	659	-0.332918	-0.809186	-0.815453	1.67869	0.732419	-1.00345	-0.451985	1.00189	Bmcp	CG7314	FBgn0036199
FBgn0036449	872	676	845	827	591	896	2028	2911	-0.406294	-0.644897	-0.439163	-0.461075	-0.748373	-0.377077	1.00097	2.0759	bmm	CG5295	FBgn0036449
FBgn0001090	31812	194193	200160	65257	2917	7382	5358	6488	-0.382368	1.53492	1.60538	0.0125291	-0.723541	-0.670821	-0.694719	-0.681377	bnb	CG7088	FBgn0001090
FBgn0037007	2618	8009	2668	1858	1304	738	990	3159	-0.0215089	2.29758	0	-0.348444	-0.586762	-0.830243	-0.721838	0.211217	BNIP3	CG5059	FBgn0037007
FBgn0014135	684	458	429	414	9191	3365	3803	2849	-0.653656	-0.72883	-0.738476	-0.743465	2.17601	0.23812	0.383811	0.066484	bnl	CG4608	FBgn0014135
FBgn0004132	5484	1107	917	1225	1254	616	537	1070	2.44172	-0.258655	-0.375874	-0.185855	-0.167963	-0.561575	-0.610314	-0.281481	boca	CG30498	FBgn0004132
FBgn0037719	1154	607	591	596	530	456	408	777	2.18326	-0.139606	-0.207551	-0.186318	-0.466591	-0.780837	-0.984672	0.58231	bocks	CG9424	FBgn0037719
FBgn0039560	4316	2517	3196	3141	2536	1727	1726	1704	1.85555	-0.0987184	0.638886	0.579139	-0.0780785	-0.956903	-0.957989	-0.981888	BOD1	CG5514	FBgn0039560
FBgn0040388	8572	1367	1885	1714	2076	1053	713	505	2.41882	-0.331585	-0.133846	-0.199123	-0.0609345	-0.45145	-0.58124	-0.660641	boi	CG32796	FBgn0040388
FBgn0029730	0	371	469	211	0	0	0	0	-0.676426	1.23379	1.73837	0.409975	-0.676426	-0.676426	-0.676426	-0.676426	boil	CG12681	FBgn0029730
FBgn0011206	191	7129	11585	10027	8779	11189	7136	6039	-2.06967	-0.172384	1.04617	0.620111	0.27883	0.937875	-0.17047	-0.470459	bol	CG4760	FBgn0011206
FBgn0050362	0	988	1818	1328	169	478	0	64	-0.872621	0.550949	1.74686	1.04084	-0.629116	-0.18389	-0.872621	-0.780406	boly	CG30362	FBgn0050362
FBgn0034328	0	0	0	0	0	0	0	856	-0.353553	-0.353553	-0.353553	-0.353553	-0.353553	-0.353553	-0.353553	2.47487	BomBc1	CG15066	FBgn0034328
FBgn0034331	0	0	0	0	0	0	452	9569	-0.372357	-0.372357	-0.372357	-0.372357	-0.372357	-0.372357	-0.237995	2.47214	BomBc2	CG15067	FBgn0034331
FBgn0040582	0	0	0	0	0	0	0	186	-0.353553	-0.353553	-0.353553	-0.353553	-0.353553	-0.353553	-0.353553	2.47487	BomBc3	CG5791	FBgn0040582
FBgn0034329	0	0	0	0	0	0	0	97	-0.353553	-0.353553	-0.353553	-0.353553	-0.353553	-0.353553	-0.353553	2.47487	BomS1	CG18108	FBgn0034329
FBgn0025583	0	53	0	0	38	0	103	1807	-0.39693	-0.312823	-0.39693	-0.39693	-0.336627	-0.39693	-0.233477	2.47065	BomS2	CG18106	FBgn0025583
FBgn0040736	0	81	53	70	73	0	342	10304	-0.377868	-0.355451	-0.3632	-0.358495	-0.357665	-0.377868	-0.283219	2.47377	BomS3	CG16844	FBgn0040736
FBgn0040733	0	0	0	0	0	0	0	180	-0.353553	-0.353553	-0.353553	-0.353553	-0.353553	-0.353553	-0.353553	2.47487	BomS6	CG15068	FBgn0040733
FBgn0040735	0	0	0	0	0	0	0	62	-0.353553	-0.353553	-0.353553	-0.353553	-0.353553	-0.353553	-0.353553	2.47487	BomT2	CG16836	FBgn0040735
FBgn0038930	0	0	0	0	0	210	0	938	-0.435734	-0.435734	-0.435734	-0.435734	-0.435734	0.201925	-0.435734	2.41248	BomT3	CG5778	FBgn0038930
FBgn0023097	3886	1997	2273	1865	1414	1209	1174	1214	2.20453	0.129614	0.432777	-0.0153779	-0.510765	-0.735941	-0.774386	-0.730449	bon	CG5206	FBgn0023097
FBgn0260942	59	513	1037	591	120	1963	4274	25055	-0.485148	-0.431978	-0.370609	-0.422843	-0.478004	-0.262161	0.00849082	2.44225	bond	CG6921	FBgn0260942
FBgn0026261	1034	868	1578	3280	14693	12076	11815	4885	-0.925325	-0.954613	-0.829346	-0.529056	1.48457	1.02285	0.976799	-0.245881	bonsai	CG4207	FBgn0026261
FBgn0033374	0	0	53	0	0	0	0	0	-0.353553	-0.353553	2.47487	-0.353553	-0.353553	-0.353553	-0.353553	-0.353553	Boot	CG13741	FBgn0033374
FBgn0040237	2172	2216	4641	12780	15070	12549	11593	3954	-1.10927	-1.10107	-0.64896	0.868441	1.29538	0.825374	0.647142	-0.777041	bor	CG6815	FBgn0287225
FBgn0259791	464	842	907	484	54	68	0	0	0.29602	1.29844	1.47082	0.349058	-0.791264	-0.754137	-0.934467	-0.934467	bora	CG6897	FBgn0259791
FBgn0030346	347	429	508	619	603	689	566	745	-1.64221	-1.0195	-0.419571	0.423368	0.301863	0.95495	0.0208836	1.38022	BORCS5	CG11802	FBgn0030346
FBgn0035140	220	343	364	499	332	616	582	758	-1.35847	-0.674371	-0.557572	0.193273	-0.735551	0.844006	0.654904	1.63378	BORCS6	CG17180	FBgn0035140
FBgn0032105	1406	1679	849	311	78	0	0	0	1.2639	1.66251	0.450625	-0.334912	-0.675116	-0.789005	-0.789005	-0.789005	borr	CG4454	FBgn0032105
FBgn0000206	0	35	51	0	157	126	0	0	-0.738174	-0.178042	0.0780184	-0.738174	1.77442	1.2783	-0.738174	-0.738174	boss	CG8285	FBgn0000206
FBgn0027535	700	760	675	725	1135	785	1074	1007	-0.857259	-0.530943	-0.993223	-0.721294	1.50853	-0.394978	1.17678	0.81239	botv	CG15110	FBgn0027535
FBgn0261284	2657	913	769	614	2020	1502	1021	963	1.91031	-0.558213	-0.762036	-0.981428	1.00868	0.275479	-0.405346	-0.487441	bou	CG14430	FBgn0261284
FBgn0004893	23369	3676	4111	2365	1888	728	1022	1929	2.44509	-0.160069	-0.102524	-0.3335	-0.396602	-0.550057	-0.511164	-0.391178	bowl	CG10021	FBgn0004893
FBgn0037205	0	44	58	0	0	0	0	0	-0.533404	1.30736	1.89306	-0.533404	-0.533404	-0.533404	-0.533404	-0.533404	BoYb	CG11133	FBgn0037205
FBgn0000210	47615	3212	778	422	131	1066	950	206	2.47056	-0.217019	-0.364342	-0.385889	-0.403502	-0.34691	-0.353931	-0.398963	br	CG11491	FBgn0283451
FBgn0029584	239	142	0	0	0	0	0	0	2.08206	1.02675	-0.518136	-0.518136	-0.518136	-0.518136	-0.518136	-0.518136	br	CG11491	FBgn0283451
FBgn0033155	2197	994	1127	1181	612	716	769	830	2.27293	-0.117745	0.14656	0.253872	-0.876878	-0.670203	-0.564878	-0.443656	Br140	CG1845	FBgn0033155
FBgn0010300	23746	17201	9491	6365	1839	369	747	876	1.84817	1.09995	0.21855	-0.138812	-0.656221	-0.824271	-0.781058	-0.766311	brat	CG10719	FBgn0010300
FBgn0050169	168	201	181	203	192	117	153	140	-0.0445979	1.02575	0.377055	1.09062	0.733838	-1.69877	-0.53112	-0.952773	Brca2	CG30169	FBgn0050169
FBgn0000216	1240	57	0	0	0	0	0	0	2.47228	-0.241121	-0.37186	-0.37186	-0.37186	-0.37186	-0.37186	-0.37186	Brd	CG3096	FBgn0000216
FBgn0039654	1803	1093	998	1172	610	327	273	464	1.84097	0.480129	0.298044	0.631547	-0.445629	-0.98805	-1.09155	-0.725464	Brd8	CG14514	FBgn0039654
FBgn0086694	3639	2651	2240	1945	1835	1223	1034	996	1.87373	0.780662	0.325956	-0.000414878	-0.122112	-0.799193	-1.00829	-1.05033	Bre1	CG10542	FBgn0086694
FBgn0038499	1579	1150	1129	1824	1058	393	433	437	1.06569	0.275574	0.236897	1.51692	0.106131	-1.11864	-1.04497	-1.0376	Brf	CG31256	FBgn0038499
FBgn0024250	5568	1155	1036	1584	1106	858	1474	1445	2.44324	-0.401808	-0.478527	-0.125232	-0.433398	-0.593283	-0.196149	-0.214845	brk	CG9653	FBgn0024250
FBgn0000212	11606	6858	5865	4390	5037	5021	3463	3067	2.20613	0.44349	0.0748508	-0.472725	-0.232534	-0.238474	-0.816862	-0.963872	brm	CG5942	FBgn0000212
FBgn0030434	1547	935	1014	1540	1360	1731	2008	2065	0.0530361	-1.42233	-1.23188	0.036161	-0.397771	0.496611	1.16438	1.3018	Brms1	CG4400	FBgn0030434
FBgn0000221	451	166	193	229	144	163	156	155	2.38637	-0.402417	-0.138216	0.214051	-0.617691	-0.431772	-0.500269	-0.510054	brn	CG4934	FBgn0000221
FBgn0259246	118	1317	1505	848	350	2270	2557	930	-1.30164	0.0932135	0.311924	-0.452398	-1.03175	1.20189	1.53577	-0.357003	brp	CG42344	FBgn0259246
FBgn0000114	36	21421	57228	120587	96762	89079	66578	24586	-1.42199	-0.910896	-0.0551272	1.45912	0.889715	0.706095	0.168333	-0.835254	bru1	CG31762	FBgn0000114
FBgn0262475	598	449	1141	5547	5172	1578	2808	4833	-1.01518	-1.08496	-0.760886	1.30249	1.12687	-0.556235	0.0197861	0.968113	bru2	CG43065	FBgn0262475
FBgn0264001	55	2879	1132	473	226	546	677	472	-0.84052	2.3138	0.362457	-0.373626	-0.649518	-0.292088	-0.145765	-0.374743	bru3	CG43744	FBgn0264001
FBgn0266717	5607	5451	6829	7627	4674	6201	7950	6550	-0.678374	-0.818704	0.420877	1.13872	-1.51765	-0.144041	1.42927	0.169903	Bruce	CG6303	FBgn0266717
FBgn0261787	1617	977	1131	1384	1344	1721	1859	1883	0.380809	-1.5307	-1.07075	-0.315101	-0.43457	0.69143	1.1036	1.17528	brun	CG2478	FBgn0261787
FBgn0036874	0	115	233	139	0	0	0	0	-0.673492	0.598813	1.90431	0.864337	-0.673492	-0.673492	-0.673492	-0.673492	brv1	CG9472	FBgn0036874
FBgn0036712	0	86	170	106	0	0	0	0	-0.67831	0.610854	1.87004	0.910659	-0.67831	-0.67831	-0.67831	-0.67831	brv2	CG16793	FBgn0036712
FBgn0040333	0	305	705	458	65	92	0	72	-0.829555	0.363205	1.92748	0.961541	-0.57536	-0.469772	-0.829555	-0.547985	brv3	CG13762	FBgn0040333
FBgn0011785	7535	3269	3071	3576	2331	3630	4320	3048	2.31124	-0.362591	-0.486693	-0.17017	-0.950508	-0.136324	0.296152	-0.501108	BRWD3	CG31132	FBgn0011785
FBgn0032130	1036	979	1110	1401	887	728	1438	1740	-0.385244	-0.555633	-0.164037	0.705844	-0.830647	-1.30594	0.816448	1.71921	brwl	CG3838	FBgn0032130
FBgn0004101	1857	822	1627	1973	4348	1614	1523	1060	0.00370744	-0.955593	-0.20947	0.111223	2.31252	-0.22152	-0.305864	-0.735	bs	CG3411	FBgn0004101
FBgn0032679	4003	2712	6023	17364	41060	22465	21403	5905	-0.843039	-0.940967	-0.689812	0.170455	1.96791	0.557389	0.476831	-0.698763	bsf	CG10302	FBgn0284256
FBgn0261822	6648	13715	8226	14322	18762	19374	19177	17382	-1.61776	-0.198033	-1.30075	-0.0760892	0.815887	0.938835	0.899259	0.538651	Bsg	CG31605	FBgn0261822
FBgn0000228	2188	1545	1799	1715	1243	1183	1497	1628	1.84146	-0.17139	0.623734	0.36078	-1.11677	-1.3046	-0.321649	0.088434	Bsg25D	CG14025	FBgn0000228
FBgn0000529	0	47	0	0	0	0	0	0	-0.353553	2.47487	-0.353553	-0.353553	-0.353553	-0.353553	-0.353553	-0.353553	bsh	CG10604	FBgn0000529
FBgn0000229	1357	1317	974	477	889	691	776	797	1.48359	1.3509	0.213126	-1.43549	-0.0688305	-0.725622	-0.443666	-0.374006	bsk	CG5680	FBgn0000229
FBgn0005666	127	1686	16666	40366	44736	161335	148425	79476	-0.973256	-0.948575	-0.711416	-0.336204	-0.26702	1.57894	1.37455	0.282974	bt	CG32019	FBgn0005666
FBgn0030228	919	1088	2209	2427	1535	2145	1918	1729	-1.53669	-1.22276	0.859598	1.26455	-0.392415	0.740712	0.31904	-0.0320434	BTBD9	CG1826	FBgn0030228
FBgn0263108	5834	3517	4146	5089	3785	5424	7842	8677	0.157361	-1.07964	-0.743828	-0.240379	-0.936558	-0.0615296	1.22939	1.67518	BtbVII	CG43365	FBgn0263108
FBgn0000233	90	86	88	53	50	0	0	0	1.0787	0.980917	1.02981	0.174182	0.100842	-1.12148	-1.12148	-1.12148	btd	CG12653	FBgn0000233
FBgn0030501	832	494	176	0	0	0	0	0	2.05913	0.978825	-0.0375549	-0.60008	-0.60008	-0.60008	-0.60008	-0.60008	BthD	CG11177	FBgn0030501
FBgn0003502	9167	6968	3927	2614	1740	639	4915	1640	1.77819	1.02849	-0.00826747	-0.455904	-0.753874	-1.12923	0.328568	-0.787966	Btk29A	CG8049	FBgn0003502
FBgn0005592	229	171	192	196	1965	4717	2431	2365	-0.792392	-0.82763	-0.814871	-0.812441	0.262308	1.93428	0.545425	0.505327	btl	CG32134	FBgn0285896
FBgn0029848	145	0	0	0	0	0	0	0	2.47487	-0.353553	-0.353553	-0.353553	-0.353553	-0.353553	-0.353553	-0.353553	Btnd	CG3599	FBgn0029848
FBgn0266756	13254	3422	3554	2476	7896	7319	5950	6345	2.03219	-0.831574	-0.793126	-1.10711	0.471565	0.303503	-0.0952451	0.0198063	btsz	CG44012	FBgn0266756
FBgn0023096	98	89	121	94	55	0	0	0	0.807843	0.62997	1.26241	0.728788	-0.041998	-1.129	-1.129	-1.129	btv	CG15148	FBgn0023096
FBgn0045862	2152	1659	2123	3687	2064	2086	1877	2076	-0.102984	-0.902532	-0.150017	2.38648	-0.245703	-0.210023	-0.548979	-0.226241	btz	CG12878	FBgn0045862
FBgn0031696	2070	1666	2022	1625	1046	1268	1092	952	1.36718	0.45024	1.25823	0.357185	-0.956937	-0.453077	-0.852534	-1.17028	Bub1	CG14030	FBgn0031696
FBgn0025457	4738	2478	1641	1455	1280	726	687	479	2.19491	0.56985	-0.0319979	-0.165742	-0.291576	-0.689932	-0.717975	-0.867539	Bub3	CG7581	FBgn0025457
FBgn0263855	869	1260	583	185	39	0	0	0	1.03684	1.84443	0.446132	-0.375908	-0.67746	-0.758012	-0.758012	-0.758012	BubR1	CG7838	FBgn0263855
FBgn0040491	140	169	132	0	235	228	1688	1447	-0.55036	-0.506617	-0.562426	-0.761529	-0.407066	-0.417625	1.78457	1.42106	Buffy	CG8238	FBgn0040491
FBgn0034050	458	473	574	403	693	605	640	888	-0.862195	-0.7655	-0.114422	-1.21674	0.652689	0.0854137	0.311035	1.90972	bug	CG8297	FBgn0034050
FBgn0032248	680	1272	1508	865	945	590	489	341	-0.393323	1.0969	1.69097	0.0723714	0.273753	-0.619877	-0.874121	-1.24668	Bug22	CG5343	FBgn0032248
FBgn0032600	3324	3033	2875	2814	2028	1637	1616	1504	1.32149	0.925091	0.709867	0.626774	-0.443901	-0.976514	-1.00512	-1.15768	BuGZ	CG17912	FBgn0032600
FBgn0259176	42410	16071	10103	18963	8846	18780	22531	13900	2.22614	-0.273244	-0.839565	0.00118616	-0.958845	-0.0161792	0.339764	-0.479256	bun	CG42281	FBgn0259176
FBgn0000239	3297	2437	2576	2218	2493	1390	1449	1514	1.67174	0.394073	0.60058	0.068712	0.47727	-1.16142	-1.07376	-0.977196	bur	CG9242	FBgn0000239
FBgn0038901	43	46	63	0	0	358	382	186	-0.586413	-0.567239	-0.458584	-0.861244	-0.861244	1.42688	1.58028	0.32756	Burs	CG13419	FBgn0038901
FBgn0031150	1679	1140	867	915	1410	685	885	828	1.86337	0.263758	-0.546435	-0.403984	1.06505	-1.08656	-0.493016	-0.662177	bves	CG32513	FBgn0031150
FBgn0000241	97	49	65	52	228	161	119	104	-0.203374	-0.992217	-0.729269	-0.942914	1.94951	0.848417	0.158179	-0.088334	bw	CG17632	FBgn0000241
FBgn0045064	106	1181	422	292	276	351	677	1020	-1.13345	1.67003	-0.309361	-0.648386	-0.690113	-0.494521	0.355651	1.25016	bwa	CG13969	FBgn0045064
FBgn0265598	1986	799	488	271	525	781	1002	465	2.23156	0.0174869	-0.562612	-0.967376	-0.493597	-0.016088	0.396137	-0.605514	Bx	CG44425	FBgn0265598
FBgn0004856	3041	2051	1824	2962	1958	1742	2000	2262	1.61901	-0.35734	-0.810502	1.4613	-0.542997	-0.9742	-0.459151	0.0638819	Bx42	CG8264	FBgn0004856
FBgn0000244	3386	745	1585	2343	717	1887	2210	2608	1.59051	-1.30467	-0.383822	0.44713	-1.33536	-0.0527567	0.30133	0.737634	by	CG9379	FBgn0000244
FBgn0011723	0	54	63	0	0	0	0	0	-0.537944	1.44831	1.77935	-0.537944	-0.537944	-0.537944	-0.537944	-0.537944	byn	CG7260	FBgn0011723
FBgn0010292	1799	1027	1045	3092	1884	1121	1058	1317	0.359157	-0.723397	-0.698156	2.1723	0.47835	-0.591584	-0.679927	-0.316738	bys	CG1430	FBgn0010292
FBgn0031367	0	358	657	302	71	119	0	0	-0.801842	0.72203	1.99476	0.483659	-0.499621	-0.295303	-0.801842	-0.801842	c-cup	CG15623	FBgn0031367
FBgn0000246	50	72	55	0	34	0	0	0	0.787508	1.52085	0.954176	-0.879175	0.254169	-0.879175	-0.879175	-0.879175	c(3)G	CG17604	FBgn0000246
FBgn0040236	1905	847	1040	1559	984	1849	1900	2690	0.496809	-1.20838	-0.897319	-0.060842	-0.987575	0.406554	0.488751	1.762	c11.1	CG12132	FBgn0040236
FBgn0040235	1002	1064	813	1290	671	621	568	620	0.653955	0.891235	-0.0693661	1.75616	-0.612814	-0.804168	-1.007	-0.807995	c12.1	CG12135	FBgn0040235
FBgn0040234	849	491	480	1122	2031	4889	4952	5359	-0.772101	-0.937357	-0.942435	-0.646081	-0.226478	1.0928	1.12189	1.30976	c12.2	CG12149	FBgn0040234
FBgn0004863	243	161	173	146	195	0	0	0	1.2927	0.466179	0.587134	0.314986	0.808884	-1.15663	-1.15663	-1.15663	C15	CG7937	FBgn0004863
FBgn0032078	922	567	446	358	198	327	902	1998	0.356673	-0.254275	-0.462513	-0.613959	-0.889316	-0.667309	0.322253	2.20845	C1GalTA	CG9520	FBgn0032078
FBgn0259228	2609	1623	1805	2103	1962	2451	2281	2681	1.09804	-1.48205	-1.0058	-0.22602	-0.594978	0.684601	0.239757	1.28645	C3G	CG42328	FBgn0259228
FBgn0021742	111	0	0	468	188	0	0	0	0.0910529	-0.57717	-0.57717	2.2402	0.554595	-0.57717	-0.57717	-0.57717	C901	CG1567	FBgn0021742
FBgn0000247	2396	1508	2407	3500	2694	5347	5683	3144	-0.638894	-1.24317	-0.631409	0.112366	-0.436108	1.36923	1.59787	-0.129888	ca	CG31037	FBgn0000247
FBgn0001991	46	792	1753	3238	9388	38849	33586	11555	-0.80647	-0.757775	-0.695045	-0.598111	-0.196667	1.72641	1.38287	-0.0552149	Ca-alpha1D	CG4894	FBgn0001991
FBgn0264386	54	426	366	210	179	1732	3028	1168	-0.812101	-0.453044	-0.510957	-0.661529	-0.69145	0.807517	2.05843	0.26314	Ca-alpha1T	CG15899	FBgn0264386
FBgn0259822	103	875	1340	1574	3257	9439	6825	1380	-0.906903	-0.673225	-0.532473	-0.461643	0.0477875	1.91903	1.12779	-0.520365	Ca-beta	CG42403	FBgn0287724
FBgn0261999	38	764	1522	2724	5675	19036	18323	5542	-0.868866	-0.774223	-0.675408	-0.518712	-0.134013	1.60776	1.51481	-0.151351	Ca-Ma2d	CG42817	FBgn0261999
FBgn0025678	11998	4513	4055	4190	3740	1475	1087	2289	2.28901	0.100752	-0.0331455	0.00632213	-0.125237	-0.787416	-0.900849	-0.549441	CaBP1	CG5809	FBgn0025678
FBgn0263111	189	1123	607	389	312	945	1221	605	-1.26343	1.17028	-0.174255	-0.742293	-0.94293	0.706464	1.42563	-0.179466	cac	CG43368	FBgn0263111
FBgn0000250	8502	3631	3592	5224	7732	4502	10098	15739	0.271617	-0.904948	-0.914368	-0.520167	0.0856276	-0.694562	0.657123	2.01968	cact	CG5848	FBgn0000250
FBgn0031114	1572	734	639	936	679	761	898	991	2.24477	-0.559729	-0.877662	0.116297	-0.743796	-0.469369	-0.0108767	0.300363	cactin	CG1676	FBgn0031114
FBgn0000251	0	309	655	391	0	166	155	546	-1.14776	0.129136	1.55893	0.467989	-1.14776	-0.461791	-0.507247	1.1085	cad	CG1759	FBgn0000251
FBgn0036715	8303	1587	1401	994	3995	378	296	156	2.21877	-0.198597	-0.265546	-0.412042	0.66814	-0.633766	-0.663281	-0.713673	Cad74A	CG6445	FBgn0036715
FBgn0261053	8022	2661	3523	2477	9822	790	752	1126	1.27429	-0.287054	-0.0360046	-0.340642	1.79852	-0.831965	-0.843032	-0.734108	Cad86C	CG42601	FBgn0261053
FBgn0037963	4702	2291	2994	1773	6149	981	2236	859	1.06507	-0.249183	0.134029	-0.531549	1.85385	-0.963275	-0.279164	-1.02978	Cad87A	CG6977	FBgn0037963
FBgn0038247	146	92	114	53	159	0	74	0	1.09848	0.203116	0.567894	-0.443538	1.31403	-1.32232	-0.0953399	-1.32232	Cad88C	CG3389	FBgn0038247
FBgn0038439	0	56	329	1595	4194	59	87	0	-0.534998	-0.497074	-0.312195	0.545156	2.30523	-0.495042	-0.47608	-0.534998	Cad89D	CG14900	FBgn0038439
FBgn0022800	3464	578	581	349	442	1626	1159	247	2.23609	-0.443596	-0.44081	-0.656225	-0.569873	0.529483	0.0958687	-0.750933	Cad96Ca	CG10244	FBgn0022800
FBgn0039294	407	172	167	139	549	0	80	0	1.12185	-0.0888724	-0.114633	-0.258889	1.85344	-0.975021	-0.562859	-0.975021	Cad96Cb	CG13664	FBgn0039294
FBgn0039709	14198	2430	2490	2095	7422	2668	1518	1852	2.23998	-0.432407	-0.418782	-0.508482	0.701224	-0.37836	-0.639513	-0.563665	Cad99C	CG31009	FBgn0039709
FBgn0015609	1307	6535	7954	11006	2257	1842	2028	583	-0.757333	0.616483	0.989369	1.79137	-0.507692	-0.616746	-0.567869	-0.947586	CadN	CG7100	FBgn0015609
FBgn0262018	0	131	213	110	68	293	320	92	-1.36967	-0.199813	0.532463	-0.387348	-0.762416	1.24688	1.488	-0.548091	CadN2	CG42829	FBgn0262018
FBgn0053653	75	1159	582	183	332	381	584	233	-1.07292	2.10372	0.412831	-0.75643	-0.319788	-0.176195	0.418692	-0.609906	Cadps	CG33653	FBgn0053653
FBgn0033526	1078	856	522	248	178	121	90	109	1.78116	1.19774	0.319966	-0.400121	-0.584085	-0.733884	-0.815354	-0.765421	Caf1-105	CG12892	FBgn0033526
FBgn0030054	6486	3027	895	621	379	246	436	389	2.2519	0.670672	-0.303937	-0.429191	-0.539817	-0.600616	-0.513761	-0.535246	Caf1-180	CG12109	FBgn0030054
FBgn0263979	7569	4765	2400	1835	1200	671	602	753	2.05646	0.924619	-0.0300217	-0.258086	-0.514406	-0.727939	-0.755791	-0.694839	Caf1-55	CG4236	FBgn0263979
FBgn0017414	219	359	322	300	290	200	256	186	-0.770842	1.50111	0.900668	0.543646	0.381364	-1.07918	-0.170397	-1.30637	cag	CG12346	FBgn0017414
FBgn0027844	78	39	43	0	37	77	866	2133	-0.439284	-0.491023	-0.485716	-0.542762	-0.493676	-0.44061	0.606109	2.28696	CAH1	CG7820	FBgn0027844
FBgn0033542	0	2161	3848	2195	362	438	0	74	-0.793314	0.717461	1.89686	0.74123	-0.540236	-0.487104	-0.793314	-0.74158	CAH13	CG12309	FBgn0033542
FBgn0034554	0	273	479	179	0	0	0	0	-0.645297	0.868483	2.01075	0.347254	-0.645297	-0.645297	-0.645297	-0.645297	CAH14	CG15227	FBgn0034554
FBgn0034560	0	493	895	633	94	193	0	0	-0.84037	0.595687	1.76667	1.00349	-0.566558	-0.278181	-0.84037	-0.84037	CAH15	CG9235	FBgn0034560
FBgn0027843	129	177	217	140	434	640	4111	9081	-0.540825	-0.525881	-0.513428	-0.537401	-0.445869	-0.381734	0.698905	2.24623	CAH2	CG6906	FBgn0027843
FBgn0030056	2097	904	864	1293	901	858	1497	2758	1.00118	-0.703899	-0.761068	-0.147926	-0.708187	-0.769644	0.143638	1.94591	CAH3	CG11284	FBgn0030056
FBgn0039235	0	288	499	304	66	102	0	0	-0.848182	0.704011	1.84121	0.790244	-0.492471	-0.298447	-0.848182	-0.848182	CAH4	CG10899	FBgn0039235
FBgn0040629	0	0	876	1327	0	0	0	126	-0.563839	-0.563839	1.13276	2.00624	-0.563839	-0.563839	-0.563839	-0.319807	CAH5	CG18673	FBgn0040629
FBgn0037788	69	3948	1794	1835	2281	1929	3789	8796	-1.13849	0.340416	-0.480815	-0.465183	-0.295142	-0.429345	0.279796	2.18876	CAH7	CG3940	FBgn0037788
FBgn0039486	0	72	0	0	0	755	2600	18030	-0.428024	-0.416534	-0.428024	-0.428024	-0.428024	-0.307538	-0.0131058	2.44927	CAH9	CG6074	FBgn0039486
FBgn0037646	78	59	42	0	49	105	239	230	-0.252451	-0.468027	-0.660912	-1.13745	-0.581489	0.0538941	1.57427	1.47216	CAHbeta	CG11967	FBgn0037646
FBgn0038478	1039	920	896	587	314	327	251	240	1.39596	1.04043	0.968729	0.0455609	-0.770054	-0.731215	-0.958273	-0.991136	cal1	CG5148	FBgn0038478
FBgn0012051	2885	809	1111	2142	2377	2407	2682	1674	1.17253	-1.61217	-1.20707	0.175888	0.491111	0.531353	0.900231	-0.451876	CalpA	CG7563	FBgn0012051
FBgn0025866	1406	723	1014	1600	616	1024	1574	1790	0.431763	-1.13996	-0.470308	0.878197	-1.38619	-0.447296	0.818365	1.31543	CalpB	CG8107	FBgn0025866
FBgn0260450	3581	906	745	671	1896	749	583	494	2.25129	-0.281308	-0.433737	-0.503797	0.65599	-0.42995	-0.587113	-0.671375	CalpC	CG3692	FBgn0260450
FBgn0005585	46926	22908	19648	26316	20327	8246	8546	17955	2.10531	0.127552	-0.140892	0.408183	-0.0849799	-1.07979	-1.05508	-0.280302	Calr	CG9429	FBgn0005585
FBgn0039928	590	2037	973	656	1027	597	422	810	-0.590081	2.26559	0.165775	-0.459829	0.272345	-0.576266	-0.921631	-0.155908	Cals	CG11059	FBgn0039928
FBgn0013995	42	736	2229	1740	413	2964	5032	6980	-1.02448	-0.737213	-0.119212	-0.321625	-0.870913	0.185028	1.04104	1.84738	Calx	CG5685	FBgn0013995
FBgn0262166	934	684	715	717	705	326	353	314	1.47291	0.391478	0.525575	0.534227	0.482318	-1.15713	-1.04034	-1.20904	calypso	CG8445	FBgn0262166
FBgn0000253	50365	35049	23128	30837	34154	43348	47324	60075	0.822308	-0.45892	-1.45615	-0.811266	-0.533789	0.235316	0.56792	1.63458	Cam	CG8472	FBgn0000253
FBgn0016126	592	1649	761	347	383	286	239	376	0.0276926	2.30117	0.391192	-0.499273	-0.421842	-0.630477	-0.731569	-0.436898	CaMKI	CG1495	FBgn0016126
FBgn0264607	552	2117	1018	573	1516	1866	1171	872	-1.13964	1.56833	-0.333305	-1.1033	0.528399	1.13401	-0.0685643	-0.585933	CaMKII	CG18069	FBgn0264607
FBgn0034210	467	560	868	667	2281	491	519	509	-0.534191	-0.382844	0.118393	-0.208713	2.4179	-0.495134	-0.449567	-0.465841	Camp	CG6568	FBgn0034210
FBgn0259234	968	1011	1495	1414	1049	1319	1364	1075	-1.17662	-0.969155	1.36598	0.975186	-0.785817	0.516842	0.733952	-0.660376	Camta	CG42332	FBgn0287478
FBgn0011569	0	66	78	0	0	0	0	0	-0.537579	1.43354	1.79193	-0.537579	-0.537579	-0.537579	-0.537579	-0.537579	can	CG6577	FBgn0011569
FBgn0040233	1573	1852	4760	2790	1647	833	1091	980	-0.283592	-0.06844	2.17408	0.654904	-0.226527	-0.854247	-0.655289	-0.740887	cana	CG33694	FBgn0040233
FBgn0030758	7482	3330	3068	7833	12838	30180	17641	16349	-0.536607	-0.995219	-1.02416	-0.497837	0.0549931	1.97051	0.585511	0.442803	CanA-14F	CG9819	FBgn0267912
FBgn0010015	0	252	189	241	645	10561	15516	4720	-0.677171	-0.634674	-0.645299	-0.636529	-0.568399	1.10383	1.93944	0.118806	CanA1	CG1455	FBgn0010015
FBgn0010014	0	300	162	72	220	446	389	306	-1.54369	0.411379	-0.487952	-1.07447	-0.109972	1.36284	0.991382	0.45048	CanB	CG4209	FBgn0010014
FBgn0015614	1654	2415	2940	3611	6486	10168	12854	6686	-1.05089	-0.860374	-0.728943	-0.560961	0.158781	1.08055	1.75298	0.20885	CanB2	CG11217	FBgn0015614
FBgn0027568	3796	4127	5565	4582	3498	2681	2298	1974	0.19009	0.462618	1.64659	0.837241	-0.0552672	-0.727941	-1.04328	-1.31005	Cand1	CG5366	FBgn0027568
FBgn0033504	509	1277	3041	9903	39018	19840	16567	15439	-0.992541	-0.932474	-0.794506	-0.257809	2.01936	0.519392	0.263402	0.175177	CAP	CG18408	FBgn0033504
FBgn0039680	3046	2167	698	176	147	108	113	134	1.94602	1.17632	-0.110003	-0.567092	-0.592486	-0.626636	-0.622258	-0.603869	Cap-D2	CG1911	FBgn0039680
FBgn0051989	731	380	422	425	241	194	204	266	2.10012	0.12453	0.360925	0.37781	-0.657826	-0.922363	-0.866079	-0.517115	Cap-D3	CG31989	FBgn0051989
FBgn0259876	3850	3406	2742	1546	722	556	384	429	1.50357	1.19243	0.727125	-0.110983	-0.688408	-0.804734	-0.925265	-0.893731	Cap-G	CG34438	FBgn0259876
FBgn0037831	581	597	549	452	371	222	192	158	1.05217	1.14043	0.875659	0.340611	-0.106182	-0.928061	-1.09354	-1.28108	Cap-H2	CG14685	FBgn0037831
FBgn0039722	35	140	105	84	0	261	329	419	-0.917593	-0.212398	-0.447463	-0.588502	-1.15266	0.600256	1.05695	1.66141	Capa	CG15520	FBgn0039722
FBgn0031883	10280	5479	4074	6256	5230	4564	5136	4319	2.31857	-0.0946225	-0.800836	0.295931	-0.219781	-0.554541	-0.267029	-0.677688	Caper	CG11266	FBgn0031883
FBgn0042134	11294	9399	8899	9241	3779	3321	3637	3357	1.38266	0.822578	0.674798	0.77588	-0.838464	-0.97383	-0.880434	-0.96319	Capr	CG18811	FBgn0042134
FBgn0023095	3955	2291	1541	1001	1513	1077	1714	2553	2.06277	0.346009	-0.427772	-0.984895	-0.45666	-0.906485	-0.249287	0.616317	caps	CG11282	FBgn0023095
FBgn0261458	12509	6583	9096	16446	9348	7761	5157	4987	0.904792	-0.617095	0.0282818	1.91587	0.0929992	-0.314566	-0.983313	-1.02697	capt	CG33979	FBgn0261458
FBgn0000256	5637	2212	4282	3171	1703	1639	896	1354	1.85032	-0.244498	1.02157	0.342052	-0.555815	-0.59496	-1.0494	-0.769273	capu	CG3399	FBgn0000256
FBgn0000257	951	547	544	884	506	456	768	739	1.48572	-0.684115	-0.700227	1.12587	-0.90432	-1.17286	0.502848	0.347092	car	CG12230	FBgn0000257
FBgn0029962	0	427	220	60	43	193	217	74	-1.10807	1.95933	0.472323	-0.677056	-0.799177	0.278365	0.450772	-0.576485	CARPA	CG1402	FBgn0029962
FBgn0052698	72	743	614	676	407	227	203	222	-1.27944	1.37436	0.864166	1.10938	0.0454824	-0.666416	-0.761336	-0.686191	CARPB	CG32698	FBgn0052698
FBgn0032879	50	55	80	79	47	57	0	63	-0.155038	0.0450109	1.04525	1.00524	-0.275067	0.12503	-2.15552	0.365089	CarT	CG9317	FBgn0032879
FBgn0004878	184	51	0	0	0	0	0	0	2.3797	0.332811	-0.452085	-0.452085	-0.452085	-0.452085	-0.452085	-0.452085	cas	CG2102	FBgn0004878
FBgn0013759	2911	1758	2018	1618	1515	2931	3927	2989	0.527834	-0.816751	-0.513549	-0.980014	-1.10013	0.551157	1.71265	0.618795	CASK	CG6703	FBgn0013759
FBgn0034068	1705	2443	2751	2403	2142	2181	2318	1966	-1.67631	0.642015	1.60955	0.516361	-0.303534	-0.181021	0.249345	-0.856413	casp	CG8400	FBgn0034068
FBgn0027885	7381	5935	5929	6918	5521	2479	2093	2152	1.1714	0.51487	0.512146	0.961181	0.326902	-1.05426	-1.22951	-1.20273	cass	CG6582	FBgn0286781
FBgn0000261	11368	12724	15209	22694	46280	6541	12569	87304	-0.565321	-0.515762	-0.424942	-0.151384	0.710624	-0.741735	-0.521427	2.20995	Cat	CG6871	FBgn0000261
FBgn0029093	5486	21034	14087	12285	9394	5118	6089	11678	-0.958209	1.92884	0.638876	0.30427	-0.232548	-1.02654	-0.846241	0.191558	cathD	CG1548	FBgn0029093
FBgn0024249	47	43	0	0	0	0	0	0	1.71394	1.52217	-0.539352	-0.539352	-0.539352	-0.539352	-0.539352	-0.539352	cato	CG7760	FBgn0024249
FBgn0002022	3401	1728	1864	1677	1993	1522	1994	2511	2.16152	-0.588984	-0.365392	-0.67283	-0.153308	-0.927659	-0.151664	0.698313	Catsup	CG10449	FBgn0002022
FBgn0015919	3733	1208	815	460	691	874	4452	3116	1.14449	-0.448255	-0.696156	-0.920086	-0.774374	-0.658939	1.59803	0.755293	caup	CG10605	FBgn0015919
FBgn0026257	307	278	284	145	40	0	0	0	1.25753	1.04944	1.09249	0.0950771	-0.658364	-0.94539	-0.94539	-0.94539	cav	CG6219	FBgn0026257
FBgn0011571	10860	6336	5344	7259	3855	4081	4340	3564	2.10396	0.257581	-0.147284	0.634285	-0.754989	-0.662752	-0.557046	-0.873755	caz	CG3606	FBgn0285954
FBgn0033842	750	635	809	1130	939	957	738	675	-0.473638	-1.16202	-0.120467	1.80102	0.657705	0.765452	-0.545469	-0.922583	cbc	CG5970	FBgn0033842
FBgn0020224	2500	2969	3072	2346	2105	1868	1941	2061	0.310454	1.33402	1.55882	-0.0256438	-0.551615	-1.06886	-0.909537	-0.647643	Cbl	CG7037	FBgn0020224
FBgn0026144	4999	4688	4274	3040	3676	672	279	164	1.11419	0.961875	0.759117	0.154762	0.466245	-1.00497	-1.19745	-1.25377	CBP	CG1435	FBgn0026144
FBgn0022943	1228	1135	1082	1082	847	604	488	821	1.19313	0.843232	0.643828	0.643828	-0.240319	-1.15456	-1.59099	-0.338139	Cbp20	CG12357	FBgn0022943
FBgn0004580	0	244	213	62	266	1713	1774	1734	-0.910542	-0.614608	-0.652207	-0.835346	-0.587926	1.16706	1.24104	1.19253	Cbp53E	CG6702	FBgn0004580
FBgn0022942	4231	3651	3277	4028	2556	1189	1153	1074	1.17935	0.748098	0.470012	1.02841	-0.0660824	-1.08251	-1.10927	-1.16801	Cbp80	CG7035	FBgn0022942
FBgn0086757	392	629	899	468	497	474	429	639	-0.97749	0.45808	2.09354	-0.517138	-0.341478	-0.480795	-0.753371	0.518653	cbs	CG4840	FBgn0086757
FBgn0031148	5940	3632	8386	14907	15679	1186	1197	2247	-0.120374	-0.513474	0.29623	1.40689	1.53838	-0.930078	-0.928204	-0.749368	Cbs	CG1753	FBgn0031148
FBgn0043364	3544	783	934	841	1655	2492	3496	3522	1.10236	-1.09421	-0.974079	-1.04807	-0.400471	0.265423	1.06418	1.08486	cbt	CG4427	FBgn0043364
FBgn0067317	0	120	161	63	0	0	0	0	-0.662401	1.18616	1.81775	0.308094	-0.662401	-0.662401	-0.662401	-0.662401	Cby	CG13415	FBgn0067317
FBgn0263113	1138	297	730	366	102	91	68	82	2.01297	-0.160908	0.958342	0.0174479	-0.664959	-0.693392	-0.752845	-0.716656	Cc2d2a	CG43370	FBgn0263113
FBgn0039007	0	46	59	0	0	81	134	0	-0.804286	0.120643	0.382036	-0.804286	-0.804286	0.824393	1.89007	-0.804286	CCAP	CG4910	FBgn0039007
FBgn0039396	0	50	0	0	181	200	195	64	-0.9486	-0.398687	-0.9486	-0.9486	1.04209	1.25105	1.19606	-0.244711	CCAP-R	CG33344	FBgn0039396
FBgn0031163	0	657	1111	607	109	137	0	0	-0.7892	0.793415	1.88703	0.672973	-0.526635	-0.459187	-0.7892	-0.7892	ccb	CG14579	FBgn0287645
FBgn0031979	196	251	339	379	339	413	378	368	-1.8743	-1.12116	0.0838728	0.631613	0.0838728	1.09719	0.61792	0.480985	CCDC53	CG7429	FBgn0031979
FBgn0036909	776	529	816	2535	7512	985	811	380	-0.423028	-0.525769	-0.406389	0.30864	2.37886	-0.336093	-0.408469	-0.587747	Ccdc58	CG15881	FBgn0036909
FBgn0031488	3545	1050	1047	1760	739	233	374	435	2.20781	-0.0901454	-0.0929085	0.563783	-0.376584	-0.842624	-0.712759	-0.656576	Ccdc85	CG17265	FBgn0031488
FBgn0038199	0	0	0	0	0	0	105	91	-0.538234	-0.538234	-0.538234	-0.538234	-0.538234	-0.538234	1.76848	1.46092	CCHa1	CG14358	FBgn0038199
FBgn0050106	0	36	47	0	0	0	705	253	-0.525583	-0.380177	-0.335747	-0.525583	-0.525583	-0.525583	2.32196	0.4963	CCHa1-R	CG30106	FBgn0050106
FBgn0038147	0	1676	950	904	493	215	314	724	-1.24595	1.92041	0.548823	0.461918	-0.314558	-0.839766	-0.652731	0.121856	CCHa2	CG14375	FBgn0038147
FBgn0033058	0	77	128	74	0	58	50	66	-1.34768	0.484925	1.69873	0.413525	-1.34768	0.032725	-0.157675	0.223125	CCHa2-R	CG14593	FBgn0033058
FBgn0038925	2099	2332	3976	11501	57948	100062	72137	54327	-0.946281	-0.940148	-0.896873	-0.698792	0.523835	1.6324	0.897333	0.42852	Cchl	CG6022	FBgn0038925
FBgn0030954	954	201	213	154	109	112	97	66	2.43727	-0.126844	-0.0859814	-0.286888	-0.440122	-0.429907	-0.480985	-0.586546	CCKLR-17D3	CG32540	FBgn0030954
FBgn0038331	778	843	752	567	856	1284	1188	1748	-0.587059	-0.416707	-0.655199	-1.14005	-0.382636	0.739065	0.487468	1.95511	Ccm3	CG5073	FBgn0038331
FBgn0052183	0	174	148	59	43	108	188	80	-1.50468	1.11346	0.722245	-0.616918	-0.857666	0.120374	1.32412	-0.300935	Ccn	CG32183	FBgn0052183
FBgn0004783	36	62	0	0	0	82	0	68	0.141019	0.874318	-0.874318	-0.874318	-0.874318	1.43839	-0.874318	1.04354	Ccp84Aa	CG2360	FBgn0004783
FBgn0004782	0	73	0	0	0	147	65	219	-0.765824	0.121559	-0.765824	-0.765824	-0.765824	1.0211	0.0243119	1.89632	Ccp84Ab	CG1252	FBgn0004782
FBgn0004781	0	0	0	0	0	120	0	0	-0.353553	-0.353553	-0.353553	-0.353553	-0.353553	2.47487	-0.353553	-0.353553	Ccp84Ac	CG1327	FBgn0004781
FBgn0004780	0	205	35	0	0	338	216	0	-0.741695	0.790269	-0.48014	-0.741695	-0.741695	1.78418	0.872472	-0.741695	Ccp84Ad	CG2341	FBgn0004780
FBgn0004779	0	0	0	201	0	125859	140066	268	-0.540303	-0.540303	-0.540303	-0.537042	-0.540303	1.50185	1.73236	-0.535955	Ccp84Ae	CG1330	FBgn0004779
FBgn0004778	0	0	0	0	0	495	464	0	-0.539686	-0.539686	-0.539686	-0.539686	-0.539686	1.68884	1.54928	-0.539686	Ccp84Af	CG1331	FBgn0004778
FBgn0004777	0	287	0	85	50	56122	72380	88	-0.537203	-0.527643	-0.537203	-0.534372	-0.535538	1.33232	1.87391	-0.534272	Ccp84Ag	CG2342	FBgn0004777
FBgn0010531	575	371	285	608	487	545	583	1119	0.0135958	-0.808193	-1.15463	0.146532	-0.340901	-0.107256	0.0458228	2.20503	Ccs	CG17753	FBgn0010531
FBgn0003676	17613	11575	13815	18383	11992	2778	2053	2779	1.1137	0.21584	0.548932	1.2282	0.277849	-1.09229	-1.2001	-1.09214	CCT1	CG5374	FBgn0003676
FBgn0030086	13993	9520	10591	17177	7968	3966	2937	2730	1.01761	0.171989	0.374461	1.61955	-0.121418	-0.877997	-1.07253	-1.11166	CCT2	CG7033	FBgn0030086
FBgn0015019	16267	10142	11725	24723	11959	2830	2328	3323	0.759151	-0.0350248	0.170229	1.85557	0.20057	-0.983109	-1.0482	-0.919186	CCT3	CG8977	FBgn0015019
FBgn0032444	14377	9294	11699	19194	8982	2386	1975	2269	0.889111	0.0828039	0.464305	1.65322	0.0333119	-1.013	-1.0782	-1.03156	CCT4	CG5525	FBgn0032444
FBgn0010621	19086	15586	19404	33390	19543	3585	3087	3566	0.415108	0.0871537	0.444905	1.75541	0.457929	-1.03735	-1.08402	-1.03913	CCT5	CG8439	FBgn0010621
FBgn0027329	16613	8461	10314	19552	10734	5250	3785	3485	1.16502	-0.223719	0.0919494	1.66569	0.163499	-0.770731	-1.0203	-1.07141	CCT6	CG8231	FBgn0027329
FBgn0037632	13264	8623	11322	19896	11249	2968	2785	3290	0.677717	-0.0914188	0.355877	1.77681	0.343779	-1.0286	-1.05893	-0.975237	CCT7	CG8351	FBgn0037632
FBgn0033342	18203	10352	13139	27956	13918	6740	5540	4658	0.726767	-0.284953	0.0741941	1.98359	0.17458	-0.750413	-0.905051	-1.01871	CCT8	CG8258	FBgn0284436
FBgn0267592	0	77	104	0	0	0	0	0	-0.532224	1.2791	1.91424	-0.532224	-0.532224	-0.532224	-0.532224	-0.532224	CCY	CG45930	FBgn0267592
FBgn0035470	357	386	353	326	322	293	367	440	0.03341	0.679337	-0.0556834	-0.657064	-0.746157	-1.39208	0.256144	1.8821	Ccz1	CG14980	FBgn0035470
FBgn0263986	100	36	120	86	34	0	0	0	1.08914	-0.226049	1.50014	0.801445	-0.267148	-0.965844	-0.965844	-0.965844	cd	CG6969	FBgn0263986
FBgn0037533	14273	4484	4779	5388	6174	4082	6439	6537	2.37448	-0.623365	-0.533022	-0.346518	-0.105808	-0.746476	-0.0246529	0.00535932	CD98hc	CG2791	FBgn0037533
FBgn0052499	8735	941	1044	740	19211	3201	1103	2593	0.62789	-0.583741	-0.567729	-0.614987	2.25646	-0.232408	-0.558557	-0.326926	Cda4	CG32499	FBgn0052499
FBgn0051973	293	1229	1117	675	14027	13015	6151	602	-0.7492	-0.58783	-0.607139	-0.683342	1.61859	1.44411	0.260738	-0.695927	Cda5	CG31973	FBgn0051973
FBgn0034197	0	0	0	0	0	0	0	142	-0.353553	-0.353553	-0.353553	-0.353553	-0.353553	-0.353553	-0.353553	2.47487	Cda9	CG15918	FBgn0034197
FBgn0039774	1292	1890	984	908	762	2598	2382	6383	-0.465197	-0.140921	-0.632215	-0.673427	-0.752598	0.243003	0.125874	2.29548	CDase	CG1471	FBgn0039774
FBgn0031952	2288	1767	3719	3450	2156	1792	1458	1721	-0.00699136	-0.626991	1.69593	1.37581	-0.164074	-0.597241	-0.994707	-0.681732	cdc14	CG7134	FBgn0031952
FBgn0025781	523	635	705	570	688	330	282	168	0.174874	0.728537	1.07458	0.407214	0.990538	-0.779207	-1.01649	-1.58004	Cdc16	CG6759	FBgn0025781
FBgn0032863	1139	713	868	595	440	293	152	211	1.70847	0.469912	0.920563	0.126836	-0.323814	-0.751205	-1.16115	-0.989614	Cdc23	CG2508	FBgn0032863
FBgn0012058	3100	2703	3711	3358	2360	2458	2912	2854	0.372046	-0.507134	1.72514	0.943403	-1.26673	-1.0497	-0.0442912	-0.172736	Cdc27	CG8610	FBgn0012058
FBgn0013435	592	475	381	350	402	317	232	406	1.84573	0.753003	-0.124917	-0.414443	0.0712142	-0.722649	-1.51651	0.108572	Cdc2rk	CG1362	FBgn0013435
FBgn0011573	4412	4037	4061	6379	4740	4039	2866	2735	0.22261	-0.106857	-0.0857715	1.95078	0.510785	-0.1051	-1.13568	-1.25077	Cdc37	CG12019	FBgn0011573
FBgn0010341	7532	7072	5691	6716	4003	2419	2695	3467	1.25967	1.0353	0.361725	0.861665	-0.461591	-1.23418	-1.09956	-0.723023	Cdc42	CG12530	FBgn0010341
FBgn0026143	1891	906	397	508	389	291	326	282	2.30182	0.512676	-0.411866	-0.210247	-0.426398	-0.604404	-0.54083	-0.620751	Cdc45	CG3658	FBgn0026143
FBgn0265574	2619	1271	1397	1699	1056	849	825	741	2.10848	-0.058061	0.144449	0.629831	-0.403614	-0.73631	-0.774883	-0.90989	Cdc5	CG6905	FBgn0265574
FBgn0030752	1734	1064	976	1713	2025	3000	3569	3379	-0.442985	-1.10475	-1.19166	-0.463727	-0.155563	0.807448	1.36945	1.18179	CDC50	CG9947	FBgn0030752
FBgn0035918	554	438	218	153	88	224	227	81	1.83806	1.14157	-0.179378	-0.569657	-0.959935	-0.143352	-0.125339	-1.00197	Cdc6	CG5971	FBgn0035918
FBgn0028360	1098	1131	1747	1477	675	737	713	1187	0.00618762	0.092163	1.69704	0.993602	-1.09586	-0.934331	-0.996859	0.238061	Cdc7	CG32742	FBgn0028360
FBgn0265082	6185	5377	4589	4271	2649	3301	6333	5660	1.0381	0.434387	-0.154384	-0.391985	-1.6039	-1.11674	1.14868	0.645836	Cdep	CG44193	FBgn0265082
FBgn0032821	4574	3565	7023	20489	5361	2568	2407	1833	-0.229674	-0.39479	0.171089	2.37471	-0.100886	-0.557943	-0.584289	-0.678221	CdGAPr	CG10538	FBgn0032821
FBgn0004876	7252	6609	6916	6225	3600	3054	4027	4679	1.18985	0.79886	0.985539	0.565359	-1.03084	-1.36285	-0.771193	-0.374727	cdi	CG6027	FBgn0004876
FBgn0038865	0	0	0	0	0	0	0	85	-0.353553	-0.353553	-0.353553	-0.353553	-0.353553	-0.353553	-0.353553	2.47487	cDIP	CG10824	FBgn0038865
FBgn0004106	1551	1414	545	144	127	0	0	0	1.66061	1.44964	0.111452	-0.506057	-0.532236	-0.727806	-0.727806	-0.727806	Cdk1	CG5363	FBgn0004106
FBgn0037093	2892	2564	3094	3459	3042	3055	3627	2849	-0.534781	-1.50523	0.0628719	1.14279	-0.0909793	-0.0525165	1.63985	-0.662004	Cdk12	CG7597	FBgn0037093
FBgn0004107	1160	1337	389	62	96	0	73	122	1.41046	1.74107	-0.0296522	-0.640441	-0.576934	-0.756248	-0.619894	-0.52837	Cdk2	CG10498	FBgn0004107
FBgn0030269	854	685	423	539	543	677	572	855	1.36431	0.268972	-1.42912	-0.677292	-0.651367	0.217122	-0.46341	1.37079	CDK2AP1	CG18292	FBgn0030269
FBgn0016131	1243	628	388	271	615	625	541	229	2.13469	0.191189	-0.567248	-0.936986	0.150107	0.181709	-0.0837441	-1.06971	Cdk4	CG5072	FBgn0016131
FBgn0013762	704	687	853	1127	857	1097	908	936	-1.20004	-1.30623	-0.269365	1.44208	-0.244381	1.2547	0.0741731	0.249065	Cdk5	CG8203	FBgn0013762
FBgn0027491	135	573	509	165	148	357	436	305	-1.13898	1.43917	1.06246	-0.962393	-1.06246	0.167757	0.632766	-0.138326	Cdk5alpha	CG5387	FBgn0027491
FBgn0263237	622	343	311	395	494	320	396	279	2.00004	-0.458159	-0.740103	0	0.872265	-0.660807	0.00881076	-1.02205	Cdk7	CG3319	FBgn0263237
FBgn0015618	367	453	436	358	328	111	106	135	0.548725	1.13677	1.02053	0.487186	0.282055	-1.20173	-1.23591	-1.03762	Cdk8	CG10572	FBgn0015618
FBgn0019949	945	915	853	813	1103	1054	1085	978	-0.217487	-0.498116	-1.07808	-1.45225	1.26049	0.80213	1.09211	0.0912043	Cdk9	CG5179	FBgn0019949
FBgn0026141	0	1166	2328	1284	207	548	0	70	-0.841269	0.559295	1.95505	0.701033	-0.592627	-0.183028	-0.841269	-0.757187	Cdlc2	CG5450	FBgn0026141
FBgn0261532	2579	1742	1978	2566	3201	4231	4389	2588	-0.340586	-1.20378	-0.960395	-0.353993	0.300881	1.36312	1.52606	-0.331304	cdm	CG7212	FBgn0261532
FBgn0010350	533	785	1247	1026	753	988	972	1311	-1.62323	-0.646677	1.14367	0.28725	-0.770684	0.139992	0.0779887	1.39169	Cds	CG7962	FBgn0010350
FBgn0000276	0	973	149	127	41	0	0	247	-0.585994	2.38172	-0.131534	-0.198636	-0.460941	-0.585994	-0.585994	0.167372	CecA1	CG1365	FBgn0000276
FBgn0000277	0	688	108	0	37	0	0	117	-0.504876	2.42022	-0.0457046	-0.504876	-0.347567	-0.504876	-0.504876	-0.00744028	CecA2	CG1367	FBgn0000277
FBgn0000278	0	2867	358	273	112	0	0	69	-0.46839	2.45169	-0.103761	-0.190335	-0.354316	-0.46839	-0.46839	-0.398112	CecB	CG1878	FBgn0000278
FBgn0000279	0	9062	1087	1492	315	0	64	367	-0.502036	2.43617	-0.149593	-0.0182787	-0.399902	-0.502036	-0.481285	-0.383042	CecC	CG1373	FBgn0000279
FBgn0032409	570	1078	936	836	1498	615	719	635	-0.936329	0.698927	0.241828	-0.0800728	2.05091	-0.791473	-0.456697	-0.727093	Ced-12	CG5336	FBgn0032409
FBgn0029092	6410	2559	1836	1596	2452	2127	4947	8934	0.961474	-0.489189	-0.761541	-0.851949	-0.529496	-0.651922	0.410365	1.91226	ced-6	CG11804	FBgn0029092
FBgn0032876	523	880	694	299	561	560	726	650	-0.518916	1.57138	0.482321	-1.83048	-0.296419	-0.302274	0.669686	0.224693	Cen	CG1962	FBgn0032876
FBgn0039056	2385	1603	1439	1003	1401	689	1975	1608	1.65321	0.170842	-0.140038	-0.966524	-0.212071	-1.56175	0.876009	0.18032	CenB1A	CG6742	FBgn0039056
FBgn0028509	1841	1028	1597	4505	716	2945	4189	6396	-0.534829	-0.944597	-0.65781	0.807882	-1.10185	0.0216099	0.648611	1.76098	CenG1A	CG31811	FBgn0028509
FBgn0266916	1223	1045	609	268	117	131	72	61	1.68084	1.29837	0.361523	-0.371192	-0.69565	-0.665568	-0.792342	-0.815978	Cenp-C	CG31258	FBgn0266916
FBgn0036480	1802	883	1064	511	478	155	0	99	1.94512	0.427662	0.726531	-0.186586	-0.241076	-0.774416	-1.03035	-0.866883	Cep135	CG17081	FBgn0036480
FBgn0035168	347	578	1603	1043	114	295	0	0	-0.26653	0.142563	1.9578	0.96606	-0.679164	-0.35862	-0.881054	-0.881054	cep290	CG13889	FBgn0035168
FBgn0266708	0	137	309	168	0	0	0	0	-0.65761	0.516234	1.98997	0.781849	-0.65761	-0.65761	-0.65761	-0.65761	Cep89	CG8214	FBgn0266708
FBgn0031575	789	1304	2269	1320	313	558	179	172	-0.101421	0.604417	1.92701	0.626346	-0.753808	-0.418021	-0.937463	-0.947057	Cep97	CG3980	FBgn0031575
FBgn0034443	150	3899	1927	1150	901	298	301	694	-0.814309	2.19342	0.611333	-0.0120341	-0.2118	-0.695572	-0.693165	-0.377871	cer	CG10460	FBgn0034443
FBgn0037315	2905	1040	1211	862	639	453	3780	4810	0.572725	-0.560571	-0.456661	-0.668736	-0.804245	-0.917271	1.10443	1.73033	Cerk	CG16708	FBgn0037315
FBgn0027569	1578	1013	924	973	949	1733	2004	6892	-0.213335	-0.493485	-0.537615	-0.513319	-0.525219	-0.13648	-0.00210732	2.42156	cert	CG7207	FBgn0027569
FBgn0030657	535	397	230	127	159	105	85	112	1.93944	1.09314	0.068992	-0.562668	-0.366424	-0.697586	-0.820238	-0.654657	cerv	CG15645	FBgn0030657
FBgn0000286	884	1498	2084	3302	1995	3663	3507	2388	-1.53022	-0.916583	-0.330929	0.886351	-0.419877	1.24714	1.09123	-0.027109	Cf2	CG11924	FBgn0000286
FBgn0030121	736	486	616	623	449	343	351	302	1.58039	-0.0143527	0.814913	0.859565	-0.250374	-0.926544	-0.875513	-1.18808	Cfp1	CG17446	FBgn0030121
FBgn0000289	10866	7124	5721	4589	3343	2868	3677	4374	2.11292	0.687225	0.152685	-0.278605	-0.753328	-0.934302	-0.626075	-0.360519	cg	CG8367	FBgn0000289
FBgn0039596	0	0	41	0	0	0	134	239	-0.582057	-0.582057	-0.12091	-0.582057	-0.582057	-0.582057	0.925105	2.10609	CG10000	CG10000	FBgn0039596
FBgn0037972	4233	1138	658	646	28175	59	70	0	-0.0143432	-0.332852	-0.382249	-0.383484	2.44955	-0.443893	-0.442761	-0.449965	CG10005	CG10005	FBgn0037972
FBgn0039590	2655	2515	3205	4249	1954	2327	1916	1527	0.129604	-0.0331275	0.768906	1.98242	-0.685216	-0.251653	-0.729386	-1.18155	CG10011	CG10011	FBgn0039590
FBgn0038012	0	113	221	100	0	0	0	0	-0.654684	0.70899	2.01233	0.552107	-0.654684	-0.654684	-0.654684	-0.654684	CG10013	CG10013	FBgn0038012
FBgn0031568	0	296	345	477	767	119	144	122	-1.14736	0.0495334	0.247667	0.781415	1.95404	-0.666174	-0.565086	-0.654044	CG10019	CG10019	FBgn0031568
FBgn0032785	110	1248	1171	708	233	355	382	470	-1.12095	1.56673	1.38487	0.291381	-0.830452	-0.542318	-0.478551	-0.270716	CG10026	CG10026	FBgn0032785
FBgn0031563	0	0	0	0	0	174	286	157	-0.683471	-0.683471	-0.683471	-0.683471	-0.683471	0.858493	1.85102	0.707842	CG10031	CG10031	FBgn0031563
FBgn0038013	736	866	687	700	1094	370	336	362	0.339743	0.819164	0.159039	0.206981	1.65999	-1.01001	-1.1354	-1.03951	CG10038	CG10038	FBgn0038013
FBgn0038014	218	74	74	0	0	0	0	0	2.23088	0.365877	0.365877	-0.592527	-0.592527	-0.592527	-0.592527	-0.592527	CG10041	CG10041	FBgn0038014
FBgn0037492	90	76	95	229	184	117	0	66	-0.240687	-0.437452	-0.170413	1.71292	1.08045	0.13879	-1.50561	-0.577999	CG10050	CG10050	FBgn0037492
FBgn0034437	40	0	0	0	0	0	0	0	2.47487	-0.353553	-0.353553	-0.353553	-0.353553	-0.353553	-0.353553	-0.353553	CG10051	CG10051	FBgn0034437
FBgn0037490	386	609	692	435	379	327	222	423	-0.319283	1.1602	1.71086	0.00580515	-0.365725	-0.710717	-1.40733	-0.0738084	CG10053	CG10053	FBgn0037490
FBgn0037482	1106	1147	1954	1607	960	772	686	701	-0.023392	0.0668736	1.84356	1.07961	-0.344826	-0.758726	-0.948064	-0.91504	CG10055	CG10055	FBgn0037482
FBgn0034439	0	86	134	61	60	59	0	64	-1.32871	0.641448	1.74107	0.0687266	0.0458177	0.0229089	-1.32871	0.137453	CG10062	CG10062	FBgn0034439
FBgn0035727	53	581	1165	740	116	261	0	62	-0.764072	0.499609	1.89732	0.880149	-0.613292	-0.266259	-0.890919	-0.742532	CG10063	CG10063	FBgn0035727
FBgn0035724	160	1219	2985	2163	315	659	0	94	-0.719221	0.245663	1.85471	1.10577	-0.577996	-0.264568	-0.865001	-0.779355	CG10064	CG10064	FBgn0035724
FBgn0037473	263	267	253	360	477	1453	2079	2184	-0.770915	-0.7662	-0.782703	-0.656575	-0.518659	0.631821	1.36973	1.4935	CG10068	CG10068	FBgn0037473
FBgn0035722	165	184	352	876	2314	2569	3096	2452	-1.09187	-1.07634	-0.939039	-0.510791	0.664438	0.87284	1.30354	0.77722	CG10075	CG10075	FBgn0035722
FBgn0035720	10998	9708	13803	16176	12516	11568	10051	10161	-0.39425	-0.975737	0.870146	1.93981	0.290011	-0.137314	-0.821125	-0.771541	CG10077	CG10077	FBgn0035720
FBgn0034644	4791	3344	3099	7049	2150	1671	3885	3930	0.629974	-0.237261	-0.384097	1.98327	-0.952864	-1.23994	0.0869782	0.113948	CG10082	CG10082	FBgn0034644
FBgn0037517	0	194	233	144	0	133	449	1199	-0.749159	-0.254816	-0.155438	-0.382224	-0.749159	-0.410254	0.394965	2.30609	CG10086	CG10086	FBgn0037517
FBgn0036369	480	873	1641	1285	241	656	212	265	-0.429855	0.315575	1.77229	1.09704	-0.883183	-0.0960239	-0.938189	-0.837661	CG10089	CG10089	FBgn0036369
FBgn0037472	3052	1185	1047	874	552	676	774	744	2.39632	0.0889814	-0.0815663	-0.295369	-0.693313	-0.540068	-0.418954	-0.45603	CG10098	CG10098	FBgn0037472
FBgn0033933	0	118	231	138	0	0	0	0	-0.676491	0.634818	1.89056	0.857074	-0.676491	-0.676491	-0.676491	-0.676491	CG10104	CG10104	FBgn0033933
FBgn0036367	0	283	57	0	0	141	330	768	-0.745788	0.323537	-0.530412	-0.745788	-0.745788	-0.213015	0.501128	2.15613	CG10116	CG10116	FBgn0036367
FBgn0038088	310	861	1092	812	269	1347	777	1416	-1.29697	0.001178	0.545412	-0.114266	-1.39357	1.14619	-0.196725	1.30875	CG10126	CG10126	FBgn0038088
FBgn0032798	96	1018	2634	6835	7741	20385	18414	10127	-1.09054	-0.969548	-0.757483	-0.206193	-0.0872997	1.57195	1.3133	0.225811	CG10132	CG10132	FBgn0032798
FBgn0032800	54	259	362	157	92	148	174	182	-1.29639	0.83823	1.91075	-0.223875	-0.900707	-0.31759	-0.0468576	0.0364448	CG10137	CG10137	FBgn0032800
FBgn0033951	1393	913	751	833	504	412	359	654	1.99445	0.556199	0.0707889	0.31649	-0.669311	-0.944976	-1.10378	-0.219858	CG10139	CG10139	FBgn0033951
FBgn0036363	0	245	0	0	0	0	0	0	-0.353553	2.47487	-0.353553	-0.353553	-0.353553	-0.353553	-0.353553	-0.353553	CG10140	CG10140	FBgn0036363
FBgn0035702	67	135	222	188	194	190	235	106	-1.70666	-0.54758	0.935361	0.355821	0.458092	0.389911	1.15695	-1.04189	CG10147	CG10147	FBgn0035702
FBgn0033960	365	424	548	242	55	90	0	0	0.70873	0.988429	1.57627	0.125628	-0.760877	-0.594954	-1.02161	-1.02161	CG10151	CG10151	FBgn0033960
FBgn0039088	0	787	1660	1032	107	240	0	72	-0.797207	0.490432	1.91878	0.891285	-0.622141	-0.404535	-0.797207	-0.679405	CG10164	CG10164	FBgn0039088
FBgn0032801	179	114	179	131	145	216	315	557	-0.344944	-0.788931	-0.344944	-0.672811	-0.577183	-0.0922127	0.584014	2.23701	CG10165	CG10165	FBgn0032801
FBgn0036353	463	774	1364	1190	486	526	312	240	-0.504071	0.255547	1.69662	1.27163	-0.447893	-0.350193	-0.872888	-1.04875	CG10171	CG10171	FBgn0036353
FBgn0039084	81	0	57	55	5571	1310	1606	360	-0.55223	-0.594871	-0.564864	-0.565917	2.3379	0.0947582	0.250583	-0.405355	CG10175	CG10175	FBgn0039084
FBgn0039083	0	1036	2285	1171	259	337	0	113	-0.812849	0.482458	2.04408	0.651248	-0.489022	-0.391499	-0.812849	-0.671565	CG10177	CG10177	FBgn0039083
FBgn0039091	0	56	0	0	0	0	0	0	-0.353553	2.47487	-0.353553	-0.353553	-0.353553	-0.353553	-0.353553	-0.353553	CG10182	CG10182	FBgn0039091
FBgn0039094	154	305	413	1030	2023	1607	2387	3763	-1.05054	-0.929098	-0.84224	-0.346024	0.452586	0.118022	0.745329	1.85196	CG10184	CG10184	FBgn0039094
FBgn0038397	202	109	138	85	62	0	0	0	1.72154	0.465828	0.857393	0.141774	-0.168778	-1.00592	-1.00592	-1.00592	CG10185	CG10185	FBgn0038397
FBgn0032793	244	299	302	324	294	295	222	287	-1.17807	0.467487	0.557244	1.21547	0.317891	0.34781	-1.83629	0.108457	CG10189	CG10189	FBgn0032793
FBgn0032790	225	191	271	507	1407	476	454	511	-0.724003	-0.81184	-0.605166	0.00452098	2.3296	-0.075565	-0.1324	0.0148547	CG10194	CG10194	FBgn0032790
FBgn0032787	266	246	140	186	331	333	310	279	0.0670321	-0.222837	-1.75914	-1.09244	1.00911	1.03809	0.704743	0.255447	CG10195	CG10195	FBgn0032787
FBgn0033970	0	0	0	0	0	0	0	58	-0.353553	-0.353553	-0.353553	-0.353553	-0.353553	-0.353553	-0.353553	2.47487	CG10205	CG10205	FBgn0033970
FBgn0039118	386	127	136	183	350	437	671	1891	-0.234724	-0.679691	-0.664229	-0.583482	-0.296573	-0.147105	0.254911	2.35089	CG10208	CG10208	FBgn0039118
FBgn0033971	604	478	543	750	629	593	704	636	-0.153309	-1.62508	-0.865834	1.55208	0.138709	-0.281797	1.01476	0.220474	CG10209	CG10209	FBgn0033971
FBgn0032685	3517	659	441	181	6886	8715	4111	302	0.125739	-0.739153	-0.805124	-0.883806	1.14527	1.69877	0.305496	-0.847189	CG10211	CG10211	FBgn0032685
FBgn0039115	255	351	397	558	946	707	982	541	-1.2563	-0.898555	-0.727135	-0.127167	1.31872	0.428083	1.45287	-0.190518	CG10214	CG10214	FBgn0039115
FBgn0036356	467	288	252	243	369	205	254	285	2.04006	-0.0876647	-0.515587	-0.622568	0.875161	-1.07426	-0.491814	-0.123325	CG10222	CG10222	FBgn0036356
FBgn0035695	51	0	119	304	65	902	1788	1063	-0.747712	-0.826256	-0.642986	-0.35807	-0.726151	0.562902	1.92742	0.810856	CG10226	CG10226	FBgn0035695
FBgn0039108	0	0	0	0	36	220	322	0	-0.572159	-0.572159	-0.572159	-0.572159	-0.287069	1.17006	1.97781	-0.572159	CG10232	CG10232	FBgn0039108
FBgn0032783	1989	491	260	282	213	2515	5965	8218	-0.166012	-0.660788	-0.737085	-0.729818	-0.752608	0.00772054	1.14722	1.89137	CG10237	CG10237	FBgn0032783
FBgn0027514	593	476	473	420	345	232	139	249	1.49479	0.724774	0.705029	0.356217	-0.137386	-0.881081	-1.49315	-0.769198	CG1024	CG1024	FBgn0027514
FBgn0039104	0	5689	10010	7127	1328	2671	101	525	-0.91545	0.602307	1.7551	0.985949	-0.561155	-0.202859	-0.888504	-0.775386	CG10252	CG10252	FBgn0039104
FBgn0027512	1072	2564	5392	3662	2967	3521	2517	1692	-1.40026	-0.271807	1.8671	0.558647	0.032995	0.452004	-0.307355	-0.93133	CG10254	CG10254	FBgn0027512
FBgn0033985	126	51	51	0	0	193	95	61	0.830506	-0.325651	-0.325651	-1.11184	-1.11184	1.86334	0.352628	-0.171497	CG10257	CG10257	FBgn0033985
FBgn0038394	41	0	0	0	11502	5604	2237	0	-0.571183	-0.581015	-0.581015	-0.581015	2.17707	0.762777	-0.0446012	-0.581015	CG10264	CG10264	FBgn0038394
FBgn0033990	233	618	671	440	349	295	205	142	-0.704906	1.28877	1.56322	0.367017	-0.104215	-0.383847	-0.8499	-1.17614	CG10265	CG10265	FBgn0033990
FBgn0032811	426	331	345	265	827	1142	757	157	-0.309738	-0.589311	-0.548111	-0.783541	0.870356	1.79736	0.664354	-1.10137	CG10268	CG10268	FBgn0032811
FBgn0035690	1316	605	563	531	472	422	756	571	2.32163	-0.173727	-0.321132	-0.43344	-0.640509	-0.815991	0.356228	-0.293055	CG10274	CG10274	FBgn0035690
FBgn0037395	0	0	0	0	635	3619	318	0	-0.456135	-0.456135	-0.456135	-0.456135	0.0506817	2.43232	-0.202328	-0.456135	CG10280	CG10280	FBgn0037395
FBgn0032681	4580	2870	4047	1478	1111	303	554	1058	1.5859	0.534729	1.25825	-0.32096	-0.546562	-1.04326	-0.888961	-0.579143	CG10283	CG10283	FBgn0032681
FBgn0037439	2161	2098	2042	4047	1431	506	475	835	0.391281	0.337881	0.290415	1.98989	-0.227479	-1.01152	-1.0378	-0.732659	CG10286	CG10286	FBgn0037439
FBgn0037432	0	476	969	649	95	208	0	0	-0.826111	0.486292	1.84557	0.963279	-0.564182	-0.252624	-0.826111	-0.826111	CG10298	CG10298	FBgn0037432
FBgn0039107	0	0	0	0	0	82	0	351	-0.438828	-0.438828	-0.438828	-0.438828	-0.438828	0.226002	-0.438828	2.40697	CG10300	CG10300	FBgn0039107
FBgn0034655	93	439	754	1185	481	368	304	809	-1.33805	-0.33406	0.579981	1.83062	-0.212188	-0.540082	-0.725792	0.739575	CG10307	CG10307	FBgn0034655
FBgn0038420	112	150	453	3408	3748	2957	3319	803	-1.08447	-1.06101	-0.873967	0.950205	1.16009	0.671795	0.895264	-0.657906	CG10311	CG10311	FBgn0038420
FBgn0038423	0	1000	1672	1169	224	392	0	0	-0.868137	0.690108	1.73725	0.953451	-0.51909	-0.257305	-0.868137	-0.868137	CG10317	CG10317	FBgn0038423
FBgn0034643	4204	1656	1890	2241	1666	1549	1926	1470	2.37955	-0.468645	-0.207076	0.185278	-0.457467	-0.588252	-0.166834	-0.676559	CG10321	CG10321	FBgn0034643
FBgn0038454	665	423	403	344	379	281	231	282	2.15085	0.349793	0.200945	-0.238157	0.0223272	-0.707028	-1.07915	-0.699586	CG10324	CG10324	FBgn0038454
FBgn0032690	2209	1392	1388	1486	1871	1167	1246	1133	1.93754	-0.253422	-0.264148	-0.00134085	1.03112	-0.856806	-0.644951	-0.947985	CG10333	CG10333	FBgn0032690
FBgn0032698	1017	521	189	78	77	64	135	169	2.21616	0.722155	-0.277868	-0.612212	-0.615225	-0.654382	-0.440522	-0.33811	CG10336	CG10336	FBgn0032698
FBgn0032805	263	0	0	0	0	0	53	80	2.32995	-0.5402	-0.5402	-0.5402	-0.5402	-0.5402	0.0381959	0.33285	CG10337	CG10337	FBgn0032805
FBgn0032700	269	429	443	448	372	358	667	500	-1.42563	-0.057709	0.0619838	0.104731	-0.54503	-0.664722	1.97707	0.549304	CG10338	CG10338	FBgn0032700
FBgn0034972	38	37	72	52	144	65	0	0	-0.282209	-0.303917	0.455876	0.0217084	2.01888	0.303917	-1.10713	-1.10713	CG10339	CG10339	FBgn0034972
FBgn0022344	1513	1231	2048	4980	14757	31840	31349	33663	-0.921338	-0.940359	-0.885252	-0.68749	-0.0280338	1.12421	1.09109	1.24717	CG10340	CG10340	FBgn0022344
FBgn0032701	1112	919	580	854	527	205	293	401	1.55774	0.957204	-0.0976263	0.75495	-0.262541	-1.26447	-0.990654	-0.654602	CG10341	CG10341	FBgn0032701
FBgn0032703	809	929	1128	1343	2411	2693	2561	2485	-1.21352	-1.06581	-0.820861	-0.556216	0.758392	1.10551	0.943028	0.84948	CG10343	CG10343	FBgn0032703
FBgn0034729	38	263	456	252	91	70	63	60	-0.833962	0.683866	1.98582	0.609661	-0.476429	-0.618093	-0.665314	-0.685552	CG10344	CG10344	FBgn0034729
FBgn0027562	0	70	106	71	110	0	106	325	-0.967735	-0.280004	0.0736854	-0.27018	0.112984	-0.967735	0.0736854	2.2253	CG10345	CG10345	FBgn0027562
FBgn0030342	1438	941	1163	1392	1154	567	457	413	1.20229	0.000906475	0.53754	1.09109	0.515784	-0.903151	-1.16905	-1.27541	CG10347	CG10347	FBgn0030342
FBgn0032707	0	188	367	330	5069	531	147	116	-0.491715	-0.382121	-0.277774	-0.299343	2.46324	-0.182171	-0.406022	-0.424093	CG10348	CG10348	FBgn0032707
FBgn0030348	0	0	44	0	0	55	154	298	-0.646164	-0.646164	-0.23337	-0.646164	-0.646164	-0.130171	0.798616	2.14958	CG10352	CG10352	FBgn0030348
FBgn0030349	2400	1380	1993	3610	818	1768	3302	2303	0.218359	-0.877463	-0.218896	1.5183	-1.48124	-0.460621	1.18741	0.114148	CG10353	CG10353	FBgn0030349
FBgn0035452	2938	1468	468	173	399	1458	1581	573	1.9681	0.365937	-0.723971	-1.04549	-0.799175	0.355038	0.489096	-0.609531	CG10359	CG10359	FBgn0035452
FBgn0036208	0	247	1046	1158	188	170	0	62	-0.766657	-0.238996	1.46789	1.70715	-0.365037	-0.40349	-0.766657	-0.634208	CG10361	CG10361	FBgn0036208
FBgn0030358	0	193	212	102	62	223	338	128	-1.48043	0.336568	0.515444	-0.520151	-0.896731	0.619003	1.70167	-0.275374	CG10362	CG10362	FBgn0030358
FBgn0039109	2063	6859	3882	4019	1439	1316	1919	2755	-0.522187	2.06368	0.458565	0.532431	-0.85863	-0.924948	-0.599828	-0.149081	CG10365	CG10365	FBgn0039109
FBgn0032814	1149	571	852	1386	1057	1519	2006	1638	-0.268418	-1.52721	-0.915235	0.247729	-0.468779	0.537381	1.59799	0.796543	CG10366	CG10366	FBgn0032814
FBgn0039116	218	282	275	148	169	118	87	51	0.585142	1.34169	1.25894	-0.242332	0.00591053	-0.596963	-0.963416	-1.38897	CG10375	CG10375	FBgn0039116
FBgn0032702	940	492	462	654	536	418	500	619	2.1835	-0.515936	-0.696703	0.4602	-0.250813	-0.961826	-0.467732	0.249307	CG10376	CG10376	FBgn0032702
FBgn0032699	1500	1028	1855	1618	651	1132	5160	4219	-0.395117	-0.684089	-0.177776	-0.322874	-0.914899	-0.620417	1.84564	1.26953	CG10383	CG10383	FBgn0032699
FBgn0034731	0	152	120	70	35	203	256	107	-1.38551	0.401106	0.0249773	-0.562724	-0.974116	1.00056	1.62353	-0.127825	CG10384	CG10384	FBgn0034731
FBgn0033019	62	128	66	0	36	0	0	0	0.546831	1.96216	0.632609	-0.782719	-0.0107222	-0.782719	-0.782719	-0.782719	CG10395	CG10395	FBgn0033019
FBgn0038431	0	43	0	0	0	82	694	2158	-0.489871	-0.433265	-0.489871	-0.489871	-0.489871	-0.381925	0.423721	2.35095	CG10405	CG10405	FBgn0038431
FBgn0038395	439	66	73	0	196	1775	1075	862	-0.193383	-0.785842	-0.774724	-0.890674	-0.579355	1.92867	0.816815	0.478494	CG10407	CG10407	FBgn0038395
FBgn0032689	1118	1773	1660	1257	875	983	1557	1937	-0.708815	0.967264	0.678108	-0.353128	-1.33063	-1.05427	0.414542	1.38692	CG10413	CG10413	FBgn0032689
FBgn0033021	2418	2233	1713	1165	1603	779	809	601	1.46149	1.19189	0.434093	-0.364507	0.27379	-0.927023	-0.883305	-1.18642	CG10417	CG10417	FBgn0033021
FBgn0036277	1260	1279	1028	1187	921	283	241	298	0.971403	1.01261	0.468215	0.813072	0.236141	-1.14763	-1.23872	-1.11509	CG10418	CG10418	FBgn0036277
FBgn0039304	331	366	250	232	333	255	412	445	0.0383429	0.485676	-0.996915	-1.22697	0.0639048	-0.93301	1.0736	1.49537	CG10425	CG10425	FBgn0039304
FBgn0032724	1072	1607	1928	1765	1600	1347	1010	693	-0.722601	0.541803	1.30045	0.915216	0.525259	-0.0726737	-0.86913	-1.61832	CG10428	CG10428	FBgn0032724
FBgn0032730	42	94	189	119	40	66	90	70	-0.965098	0.10838	2.06954	0.624475	-1.00639	-0.469647	0.0258048	-0.387071	CG10431	CG10431	FBgn0032730
FBgn0034638	91	156	494	589	401	1202	3233	1361	-0.823707	-0.760708	-0.433116	-0.341041	-0.523252	0.253085	2.22155	0.407189	CG10433	CG10433	FBgn0034638
FBgn0037539	817	639	619	514	486	497	596	840	1.38995	0.094604	-0.0509406	-0.81505	-1.01881	-0.938763	-0.218317	1.55733	CG10435	CG10435	FBgn0037539
FBgn0034494	568	512	656	542	401	551	1087	1384	-0.425784	-0.59065	-0.166707	-0.502329	-0.91744	-0.475832	1.10218	1.97656	CG10444	CG10444	FBgn0034494
FBgn0037531	125	120	87	0	0	0	0	0	1.43153	1.34581	0.780056	-0.71148	-0.71148	-0.71148	-0.71148	-0.71148	CG10445	CG10445	FBgn0037531
FBgn0033440	0	351	685	366	76	75	0	0	-0.777561	0.628357	1.96618	0.688439	-0.473146	-0.477151	-0.777561	-0.777561	CG10459	CG10459	FBgn0033440
FBgn0032815	726	667	910	1040	961	654	646	600	-0.293569	-0.64348	0.797677	1.56867	1.10014	-0.720579	-0.768024	-1.04084	CG10462	CG10462	FBgn0032815
FBgn0032819	855	570	622	1322	994	334	277	276	0.526455	-0.228462	-0.0907224	1.76346	0.894642	-0.853585	-1.00457	-1.00722	CG10463	CG10463	FBgn0032819
FBgn0033017	474	931	481	210	320	133	164	128	0.435584	2.11013	0.461234	-0.53177	-0.128706	-0.813915	-0.700324	-0.832236	CG10465	CG10465	FBgn0033017
FBgn0032822	211	246	230	172	407	226	162	179	-0.23249	0.216456	0.0112236	-0.732743	2.2816	-0.0400844	-0.861013	-0.642954	CG10466	CG10466	FBgn0032822
FBgn0035679	244	443	286	263	271	655	1485	2437	-0.649513	-0.399265	-0.596697	-0.62562	-0.61556	-0.132669	0.911079	2.10824	CG10467	CG10467	FBgn0035679
FBgn0035678	85	85	54	59	60	77	106	121	0.17416	0.17416	-1.13468	-0.923578	-0.881357	-0.163605	1.0608	1.69411	CG10469	CG10469	FBgn0035678
[truncated: 11,431 more rows]

## Sheet: Mfuzz_clusters
1	2	3	4	5	6	7	8	9		symbol	Cluster
[truncated: 567 more rows]

## Sheet: Mfuzz_coreprofiles
NormMyo	Norm16h	Norm24h	Norm30h	Norm48h	Norm72h	Norm90h	Norm1d	Cluster	num_genes
[truncated: 9 more rows]

[truncated: 1 more sheets: Venn_DERBPs]
