# Supplementary material for: A Candidate RNAi Screen Reveals Diverse RNA-Binding Protein Phenotypes in Drosophila Flight Muscle
Source: Preprints.org preprint supplement (doi:10.20944/preprints202108.0137.v1), 2021-08-05

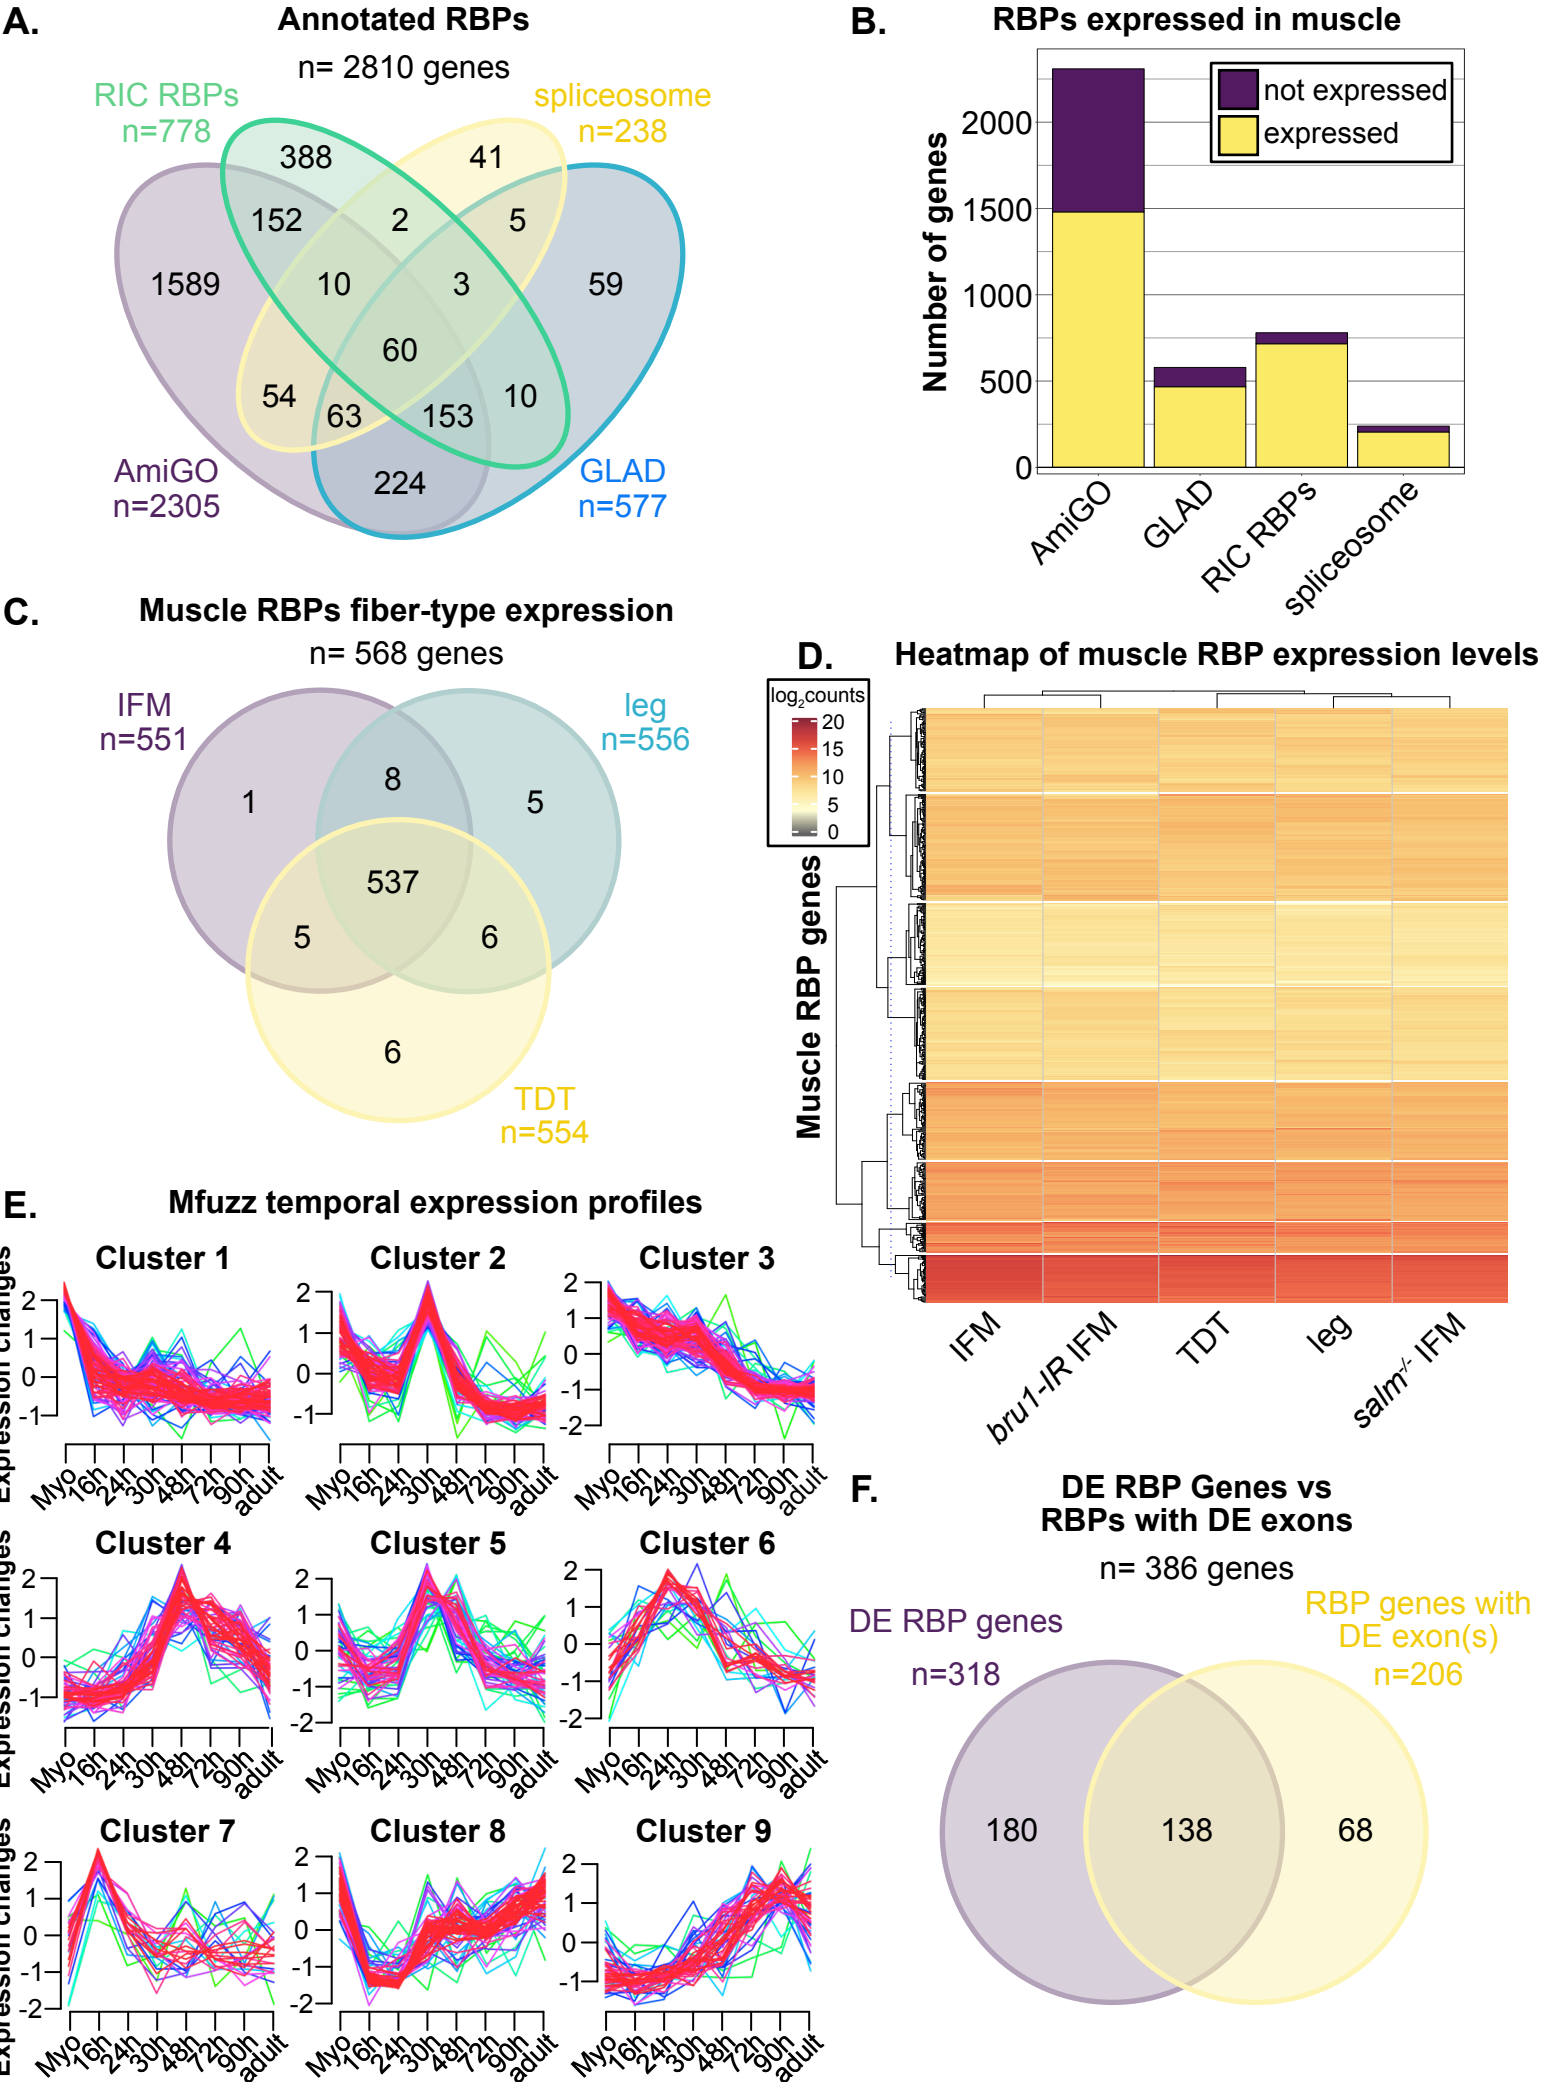

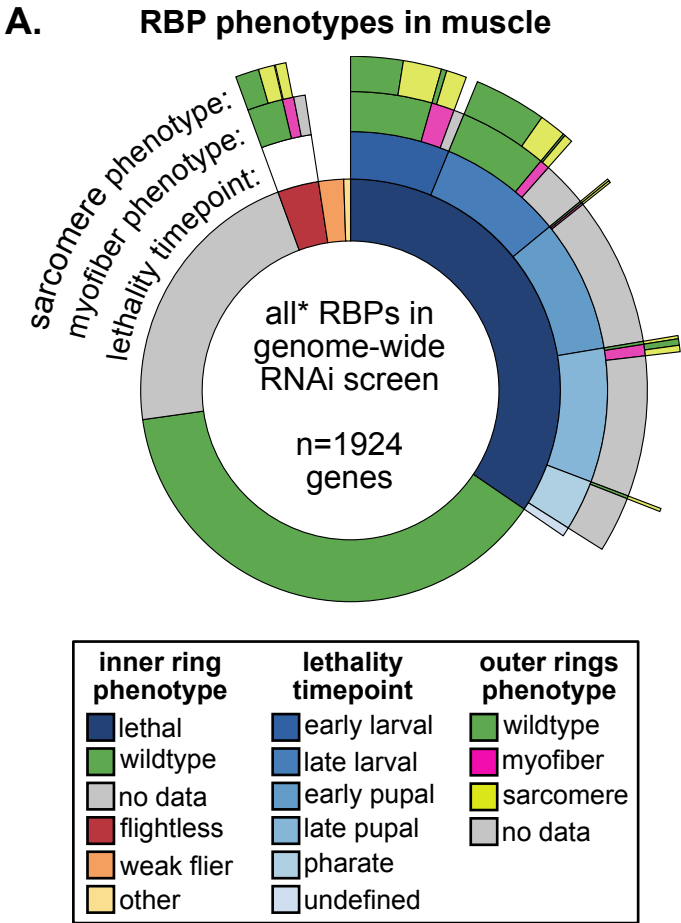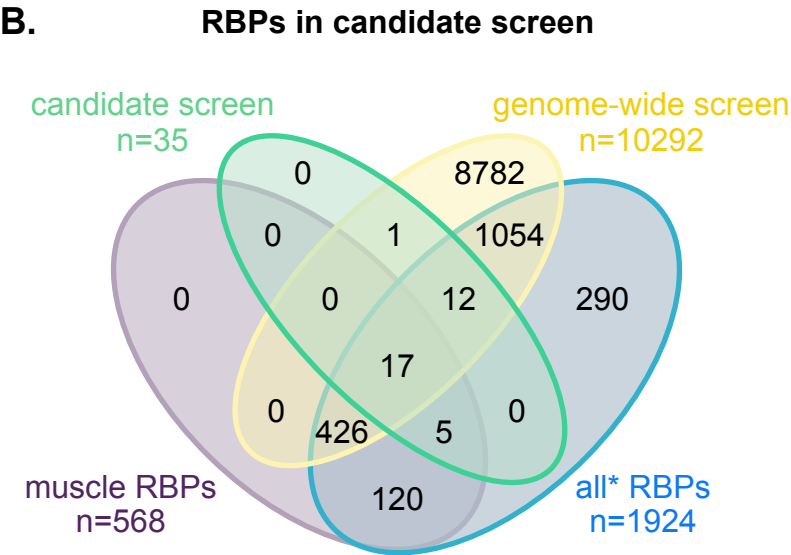

**C. Mef2-Gal4 hairpin phenotypes**

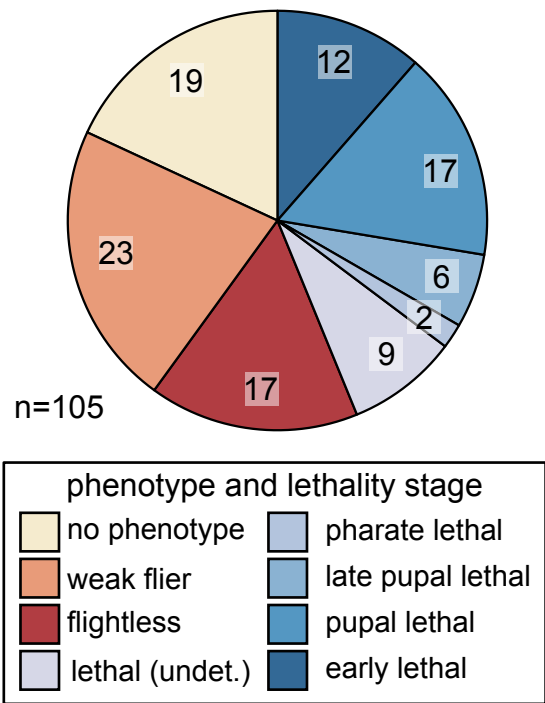

**D. Hairpin strength**

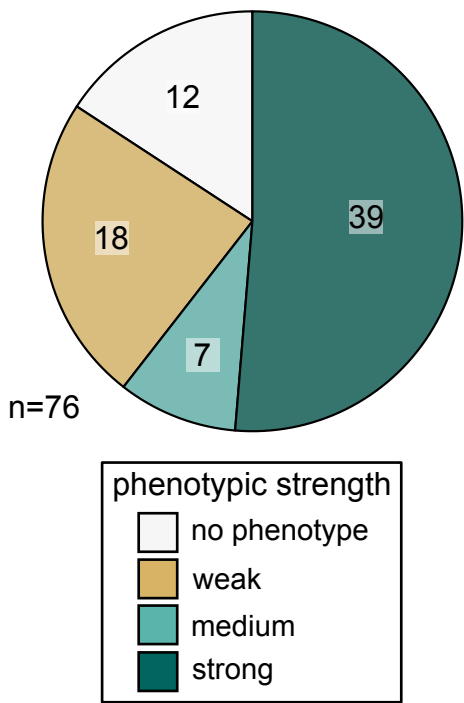

A. Act88F-Gal4 RNAi phenotypes

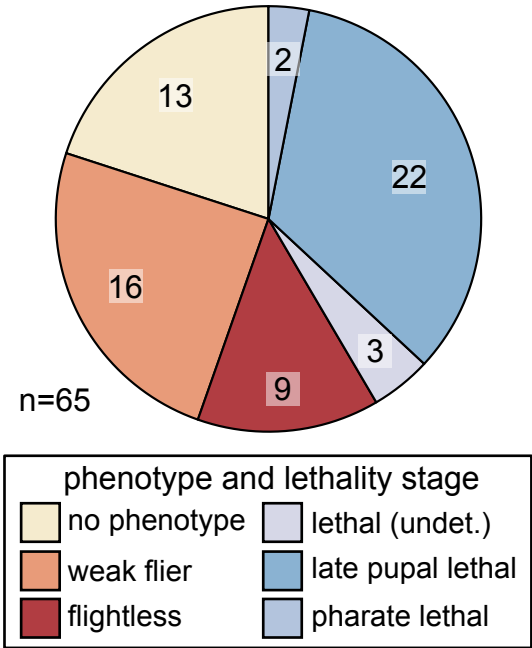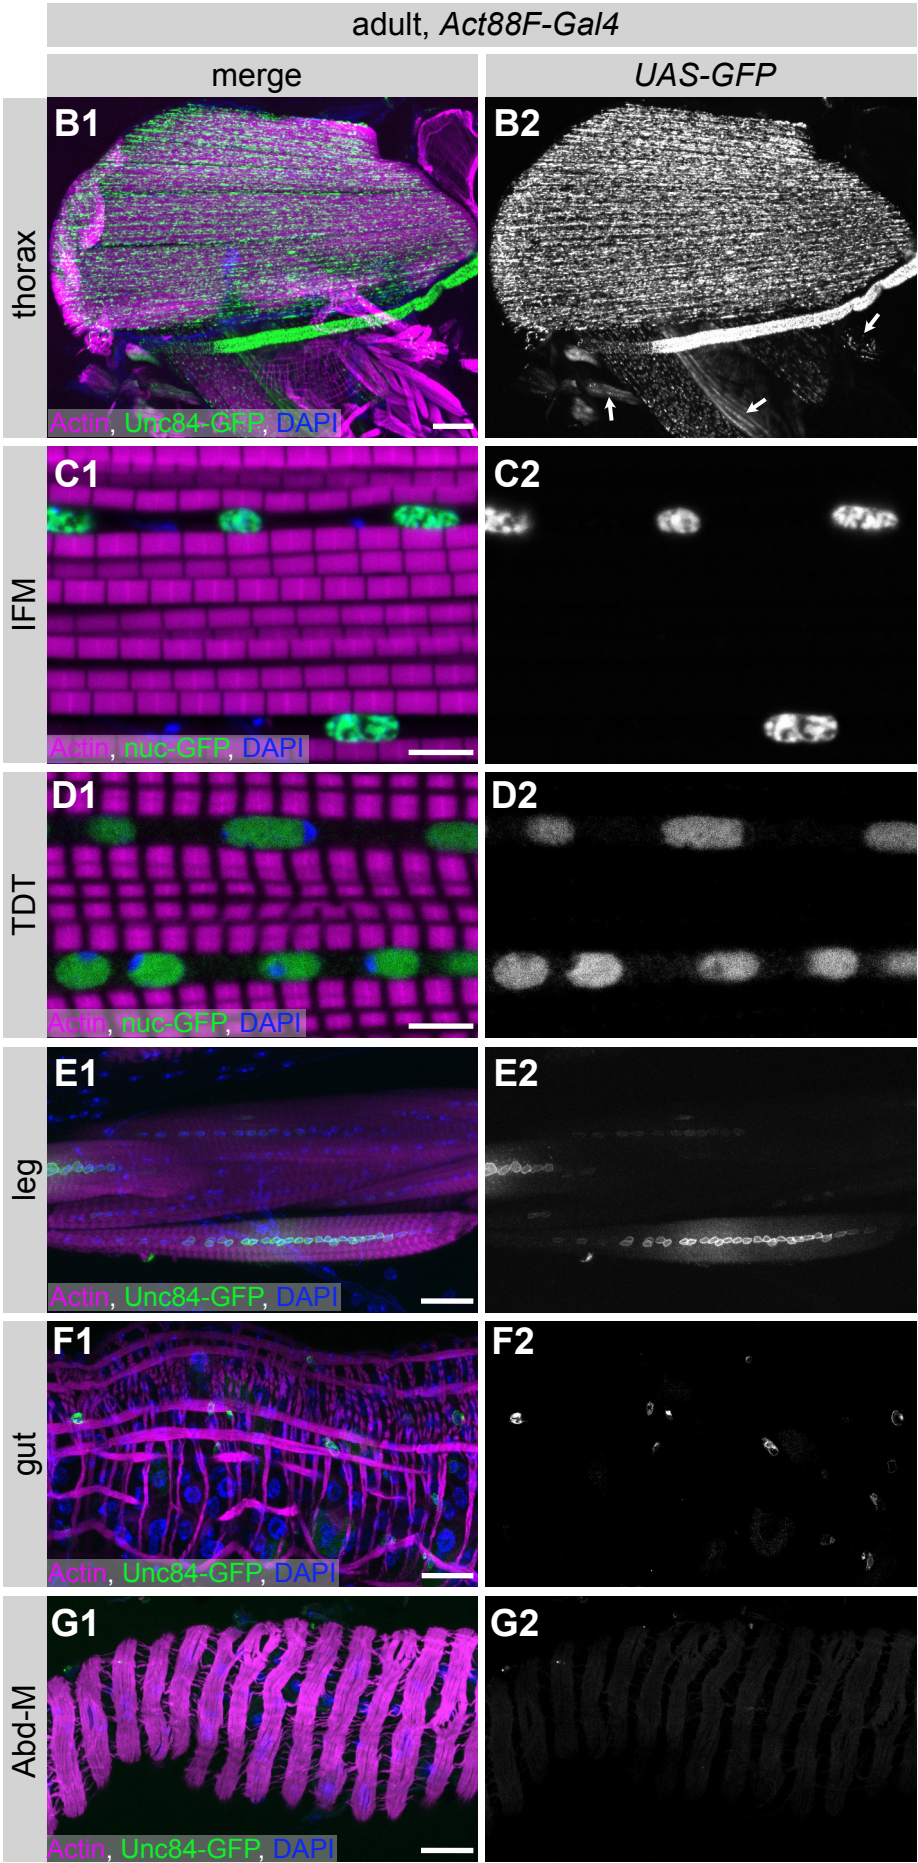

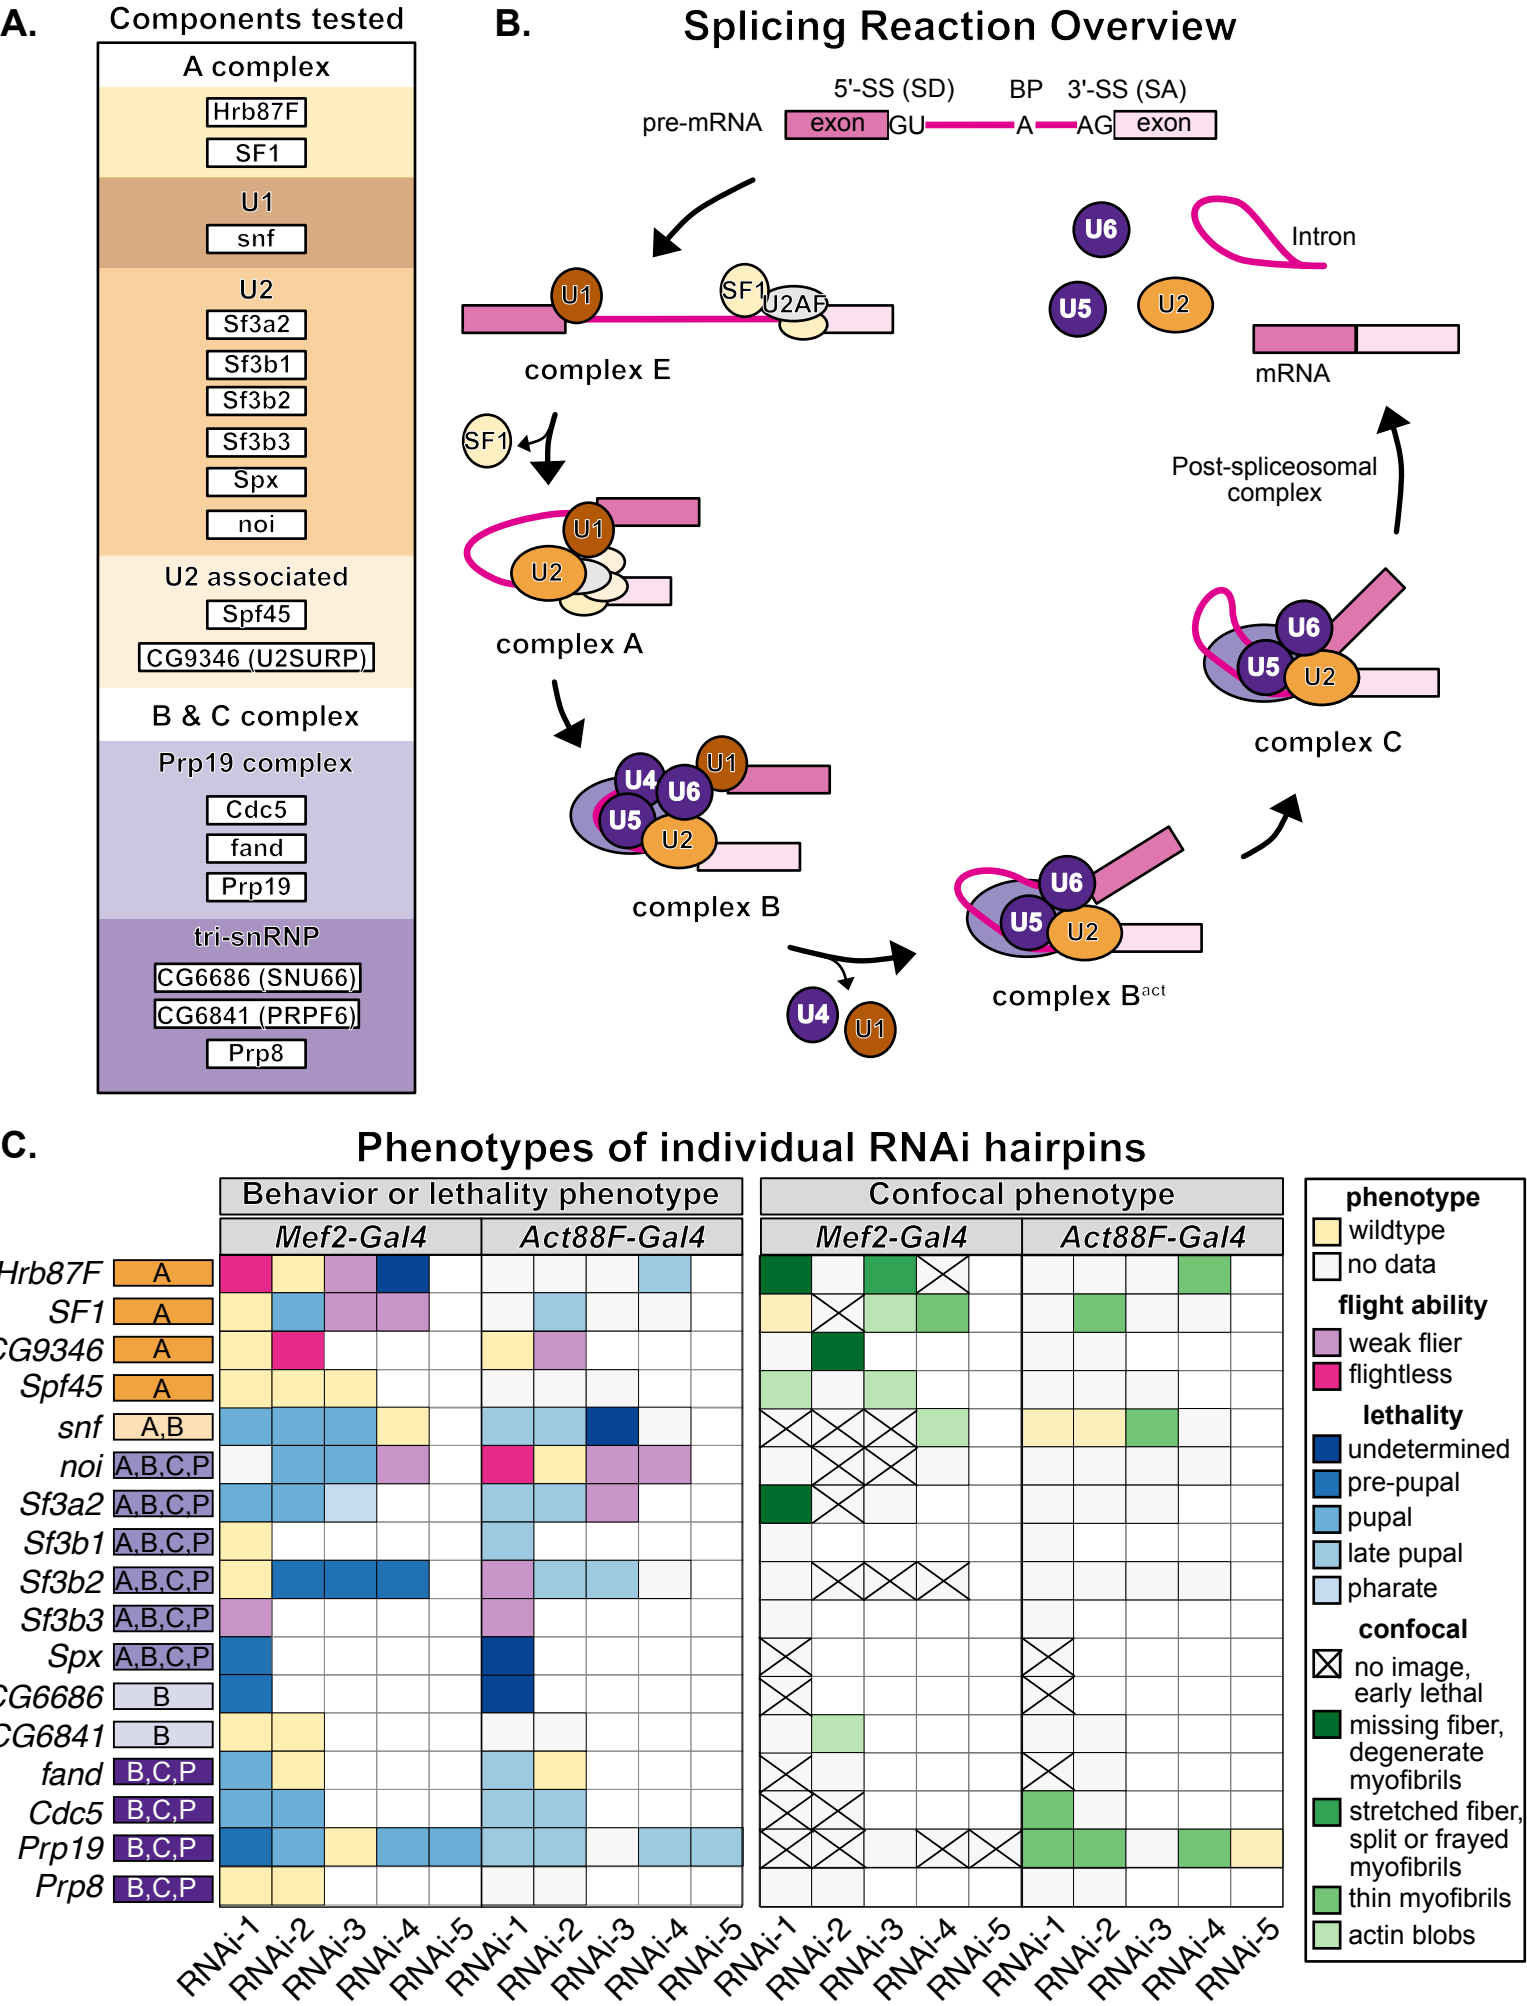



A. violin plot of sarcomere gene FC

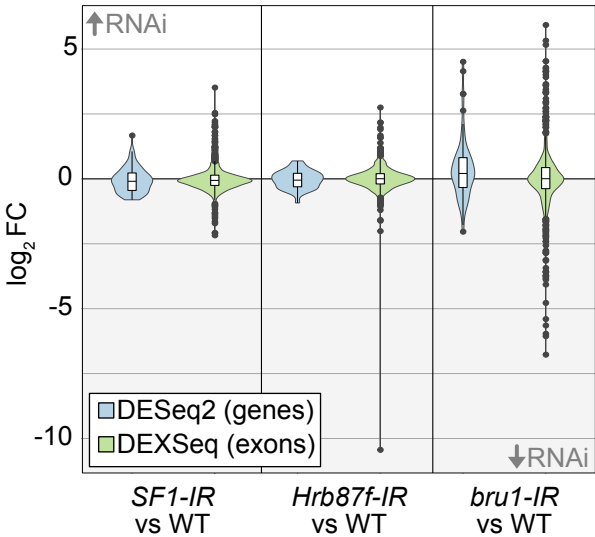

B. Differential expression of s/s (Kettin) and key Z-disc components in IFM

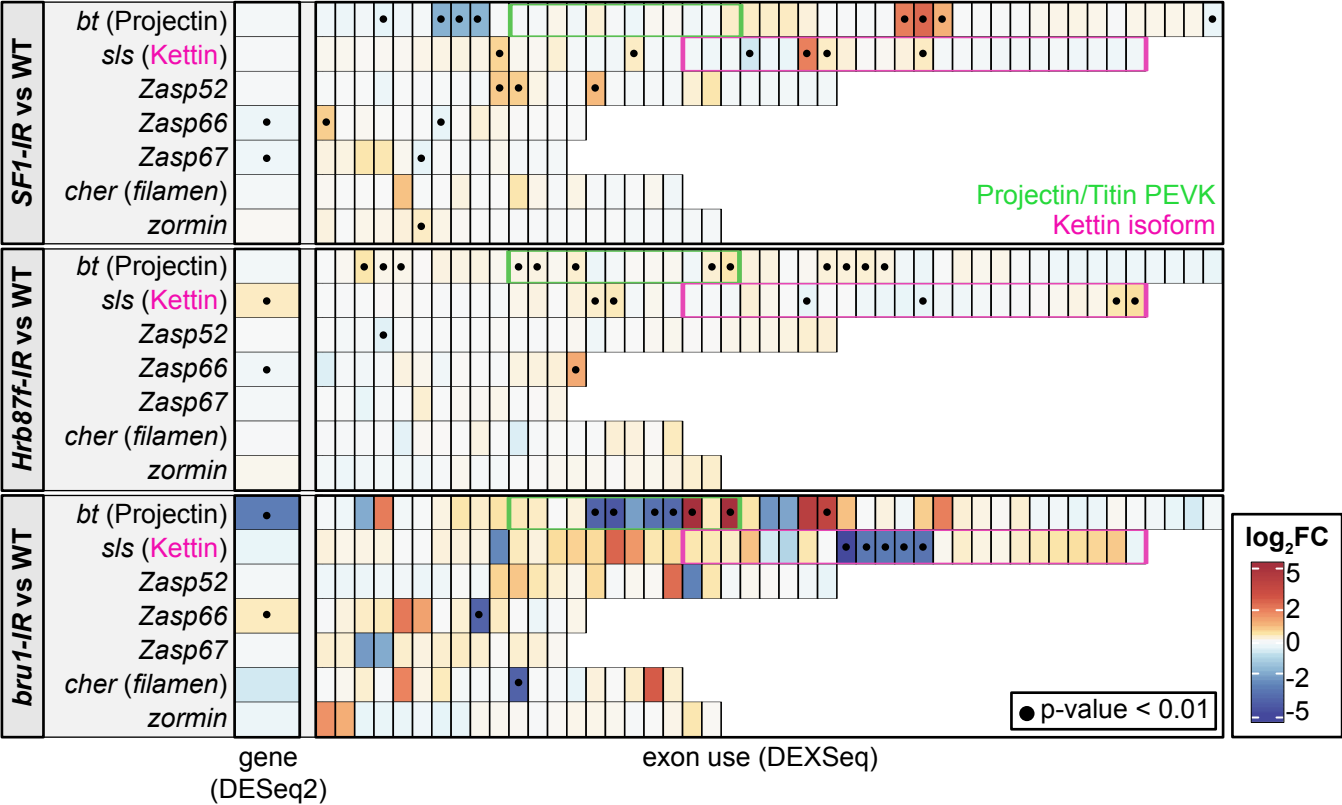

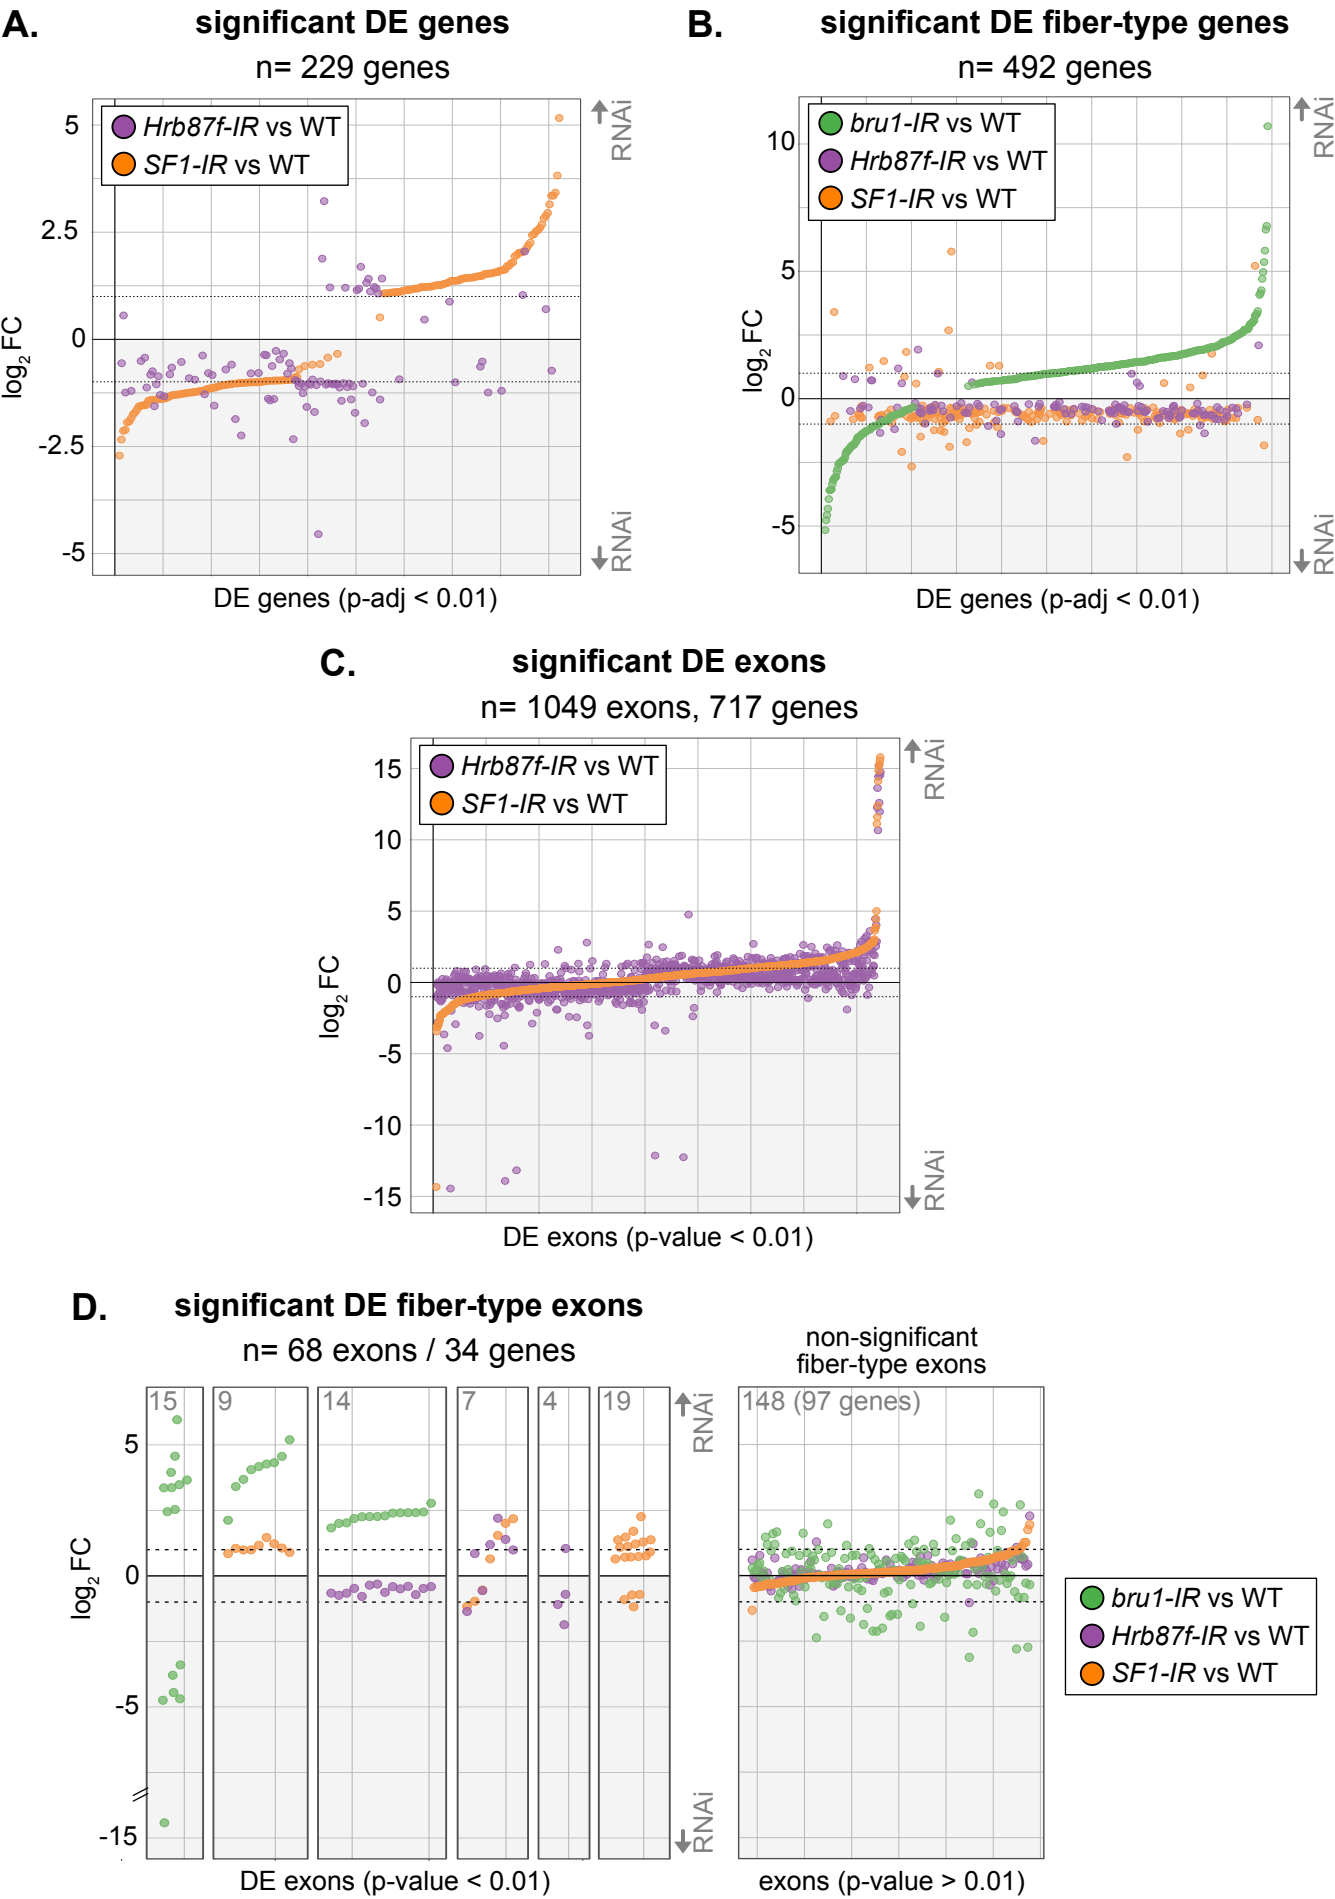

Supplement: Supplementary file 1 [file supplementary]
