# Supplementary material for: A Candidate RNAi Screen Reveals Diverse RNA-Binding Protein Phenotypes in Drosophila Flight Muscle
Source: Preprints.org preprint supplement (doi:10.20944/preprints202108.0137.v1), 2021-08-05
Supplement: Supplementary file 2 [file Supplemental_Table_1.xlsx]

## Sheet: Key Resources Table
Table S1
Key Resources Table
Reagent type (species) or resource	designation	source or reference	identifiers	additional information
gene (Drosophila melanogaster)	Splicing factor 1; SF1	Flybase	Flybase: FBgn0025571
gene (D. melanogaster)	Heterogeneous nuclear ribonucleoprotein at 87F; Hrb87F	Flybase	Flybase: FBgn0004237
gene (D. melanogaster)	bruno1; bru1	Flybase	Flybase: FBgn0000114
genetic reagent (D. melanogaster)	w[1118]	Bloomington Drosophila Stock Center	BDSC:3605; FLYB:FBst0003605; RRID:BDSC_3605
genetic reagent (D. melanogaster)	Mef2-Gal4	PMID: 8654890
genetic reagent (D. melanogaster)	Act88F-Gal4	PMID: 22008792		Source: Richard Cripps
genetic reagent (D. melanogaster)	UAS-Dcr2, Mef2-GAL4	Bloomington Drosophila Stock Center	BDSC:25756, RRID:BDSC_25756
genetic reagent (D. melanogaster)	UAS-GFPnls	NA		Source: Ulrike Gaul
genetic reagent (D. melanogaster)	UAS-Unc84::GFP	NA		Source: Frank Schnorrer
genetic reagent (D. melanogaster)	RNAi against Splicing factor 1; SF1	Vienna Drosophila Stock Center	VDRC:13426
genetic reagent (D. melanogaster)	RNAi against Heterogeneous nuclear ribonucleoprotein at 87F; Hrb87F	Bloomington Drosophila Stock Center	BDSC:31244
antibody	rhodamine-phalloidin	Invitrogen, Molecular Probes	Invitrogen:R415	(1:500)
antibody	rabbit anti-GFP	Abcam	Abcam:ab290	(1:1000)
antibody	rat anti-Kettin	Babraham		(1:1000)
antibody	goat anti-rabbit, Alexa488-conjugated	Thermo Fisher	ThermoFisher: A-11006	(1:500)
antibody	goat anti-mouse, Alexa647-conjugated	Thermo Fisher	ThermoFisher: A-21236	(1:500)
chemical compound	Vectashield with DAPI	Biozol	Biozol:H-1200	OrderID: VEC-H-1200
chemical compound	NGS	Thermo Fisher	Thermo:20217
chemical compound	Isopropanol	Sigma	Sigma: BCBW3004
chemical compound	Chlororform BioChemica	AppliChem GmbH	ApplicChem: 72013390, A1935,0500
chemical compound	Glycogen	Invitrogen, Molecular Probes	Invitrogen: 1998762
chemical compound	Trizol	Ambion	Ambion: 16655301
chemical compound	Triton X-100	Sigma	Sigma: SLBZ2181
chemical compound	PBS	Homemade
software, algorithm	Excel	Microsoft
software, algorithm	Fiji (Image J)	PMID: 22743772
software, algorithm	R	R Project for Statistical Computing	RRID:SCR_001905
software, algorithm	STAR	PMID: 23104886
software, algorithm	SAMtools	PMID: 19505943
software, algorithm	featureCounts	PMID: 24227677
software, algorithm	DESeq2	PMID: 25516281
software, algorithm	DEXSeq	PMID: 22722343
software, algorithm	GOrilla	PMID: 19192299		Source: http://cbl-gorilla.cs.technion.ac.il/
software, algorithm	PWMTools	PMID: 29514181		Source: https://ccg.epfl.ch/pwmtools/
software, algorithm	ggplot2	ISBN:978-0-387-98140-6
software, algorithm	reshape2	DOI: 10.18637/jss.v021.i12		Source: https://github.com/hadley/reshape ; Author: Hadley Wickham
software, algorithm	stringr	ISBN: 978-1491910399		Source: https://​github.com/​tidyverse/​stringr/​ ; Author: Hadley Wickham
software, algorithm	tidyr	ISBN: 978-1491910399		Source: https://github.com/tidyverse/tidyr ; Author: Hadley Wickham
software, algorithm	plyr	DOI: 10.18637/jss.v040.i01
software, algorithm	VennDiagram	PMID: 21269502
software, algorithm	viridis	DOI: 10.5281/zenodo.4679424		Source: https://sjmgarnier.github.io/viridis/ ; Author: Simon Garnier
software, algorithm	Mfuzz	PMID: 18084642		Source: http://mfuzz.sysbiolab.eu/ ; Author: Matthias Futschik
software, algorithm	ComplexHeatmap	DOI: 10.18129/B9.bioc.ComplexHeatmap		Source: https://jokergoo.github.io/ComplexHeatmap-reference/book/ ; Author: Zuguang Gu
software, algorithm	GenomicRanges	PMID: 23950696		Source: https://bioconductor.org/packages/release/bioc/html/GenomicRanges.html ; Author: P. Aboyous, H. Pagés and M. Lawrence
software, algorithm	rrvgo	DOI: 10.18129/B9.bioc.rrvgo		Source: https://ssayols.github.io/rrvgo/authors.html ; Author: Sergi Sayols.
software, algorithm	org.Dm.eg.db	DOI: 10.18129/B9.bioc.org.Dm.eg.db		Source: https://bioconductor.org/packages/release/data/annotation/html/org.Dm.eg.db.html ; Author: Carlson M
software, algorithm	circlize			Source: https://github.com/jokergoo/circlize ; Author: Zuguang Gu

## Sheet: RNAi hairpins in screen
Gene	Gene_tested	Hairpin_ID	Stock Center	Stock_Number	SYMBOL	ANNOTATION_SYMBOL
orb	orb	TRiP.JF01864	Bloomington	25843	orb	CG10868
Rbfox1,_A2BP1	Rbfox1	TRiP.JF02600	Bloomington	27286	Rbfox1	CG32062
SF1	SF1	TRiP.JF02871	Bloomington	28036	SF1	CG5836
me31B	me31B	TRiP.HM05052	Bloomington	28566	me31B	CG4916
Rbp9	Rbp9	TRiP.JF03084	Bloomington	28669	Rbp9	CG3151
mbl	mbl	TRiP.JF03264	Bloomington	29585	mbl	CG33197
mbl	mbl	TRiP.JF03264	Bloomington	29585	mbl	CG33197
Hrb87F,_hnRNP_A	Hrb87F	TRiP.JF01757	Bloomington	31244	Hrb87F	CG12749
Rm62	Rm62	TRiP.JF01385	Bloomington	31395	Rm62	CG10279
Hrb87F,_hnRNP_A	Hrb87F	TRiP.JF01250	Bloomington	31472	Hrb87F	CG12749
Rbfox,_A2BP1	Rbfox1	TRiP.HMS00478	Bloomington	32476	Rbfox1	CG32062
Prp19	Prp19	TRiP.HMS00652	Bloomington	32865	Prp19	CG5519
Sf3b1	Sf3b1	TRiP.HMS00055	Bloomington	33650	Sf3b1	CG2807
Sf3b2	Sf3b2	TRiP.HMS00056	Bloomington	33651	Sf3b2	CG3605
me31B	me31B	TRiP.HMS00539	Bloomington	33675	me31B	CG4916
Sf3b3	Sf3b3	TRiP.HMS00614	Bloomington	33731	Sf3b3	CG13900
Prp8	Prp8	TRiP.HMS01297	Bloomington	34622	Prp8	CG8877
YT521-B	YT521-B	TRiP.HMS01302	Bloomington	34627	Ythdc1	CG12076
Rm62	Rm62	TRiP.HMS00144	Bloomington	34829	Rm62	CG10279
noi,_Sf3a3	noi	TRiP.HMS00163	Bloomington	34845	noi	CG2925
mub	mub	TRiP.HMS00189	Bloomington	34872	mub	CG7437
mub	mub	TRiP.HMS00189	Bloomington	34873	mub	CG7437
mub	mub	TRiP.HMS00189	Bloomington	34875	mub	CG7437
Atx2	Atx2	TRiP.HMS01392	Bloomington	36114	Atx2	CG5166
me31B	me31B	TRiP.GL00695	Bloomington	38923	me31B	CG4916
Ime4/Mettl3	Mettl3	TRiP.GL01126	Bloomington	41590	Mettl3	CG5933
Rbm17,_Spf45	Rbm17	TRiP.HMS02351	Bloomington	41954	Spf45	CG17540
Rbp9	Rbp9	TRiP.GL01167	Bloomington	42796	Rbp9	CG3151
orb	orb	TRiP.GL01484	Bloomington	43143	orb	CG10868
Atx2	Atx2	TRiP.HMS02726	Bloomington	44012	Atx2	CG5166
Bru1,_Aret	Bru1	TRiP.HMC02374	Bloomington	44483	bru1	CG31762
Cdc5	Cdc5	TRiP.HMC02918	Bloomington	44524	Cdc5	CG6905
doa	doa	TRiP.HMJ03121	Bloomington	50903	Doa	CG42320
snf,_SNRPA	snf	TRiP.HMC03197	Bloomington	51459	snf	CG4528
Prp6_(CG6841)	Prp6	TRiP.HMC03484	Bloomington	51909	Prp6	CG6841
Hrb87F,_hnRNP_A	Hrb87F	TRiP.HMC03679	Bloomington	52937	Hrb87F	CG12749
SF1	SF1	TRiP.HMC03680	Bloomington	52938	SF1	CG5836
Smn	Smn	TRiP.HMC03832	Bloomington	55158	Smn	CG16725
Sart1_(CG6686)	Sart1	TRiP.HMC03913	Bloomington	55202	Sart1	CG6686
Cdc5	Cdc5	TRiP.HMC03948	Bloomington	55261	Cdc5	CG6905
Sf3a2	Sf3a2	TRiP.HMC03799	Bloomington	55650	Sf3a2	CG10754
How	How	TRiPHMC03820	Bloomington	55665	how	CG10293
snf,_SNRPA	snf	TRiP.HMC04200	Bloomington	55914	snf	CG4528
U2SURP_(CG9346)	U2SURP	TRiP.HMC04119	Bloomington	56898	U2SURP	CG9346
Spx,_Sf3b4	Spx	TRiP.HMJ23875	Bloomington	62421	Spx	CG3780
Mettl14	Mettl14	TRiP.HMC05566	Bloomington	64547	Mettl14	CG7818
Ime4/Mettl3	Mettl3	TRiP.HMS06011	Bloomington	80431	Mettl3	CG5933
Ime4/Mettl3	Mettl3	TRiP.HMS06028	Bloomington	80448	Mettl3	CG5933
Ime4/Mettl3	Mettl3	TRiP.HMS06030	Bloomington	80450	Mettl3	CG5933
Ime4/Mettl3	Mettl3	5933R	NIG	NIG5933R-4	Mettl3	CG5933
Hrb87F,_hnRNP_A	Hrb87F	KK108162	Vienna Drosophila Resource Center (VDRC)	100732	Hrb87F	CG12749
Rbp9	Rbp9	KK109093	Vienna Drosophila Resource Center (VDRC)	101412	Rbp9	CG3151
doa	doa	KK111879	Vienna Drosophila Resource Center (VDRC)	102520	Doa	CG42320
sbr	sbr	KK100882	Vienna Drosophila Resource Center (VDRC)	103715	sbr	CG1664
fand	fand	KK101751	Vienna Drosophila Resource Center (VDRC)	104186	fand	CG6197
snf,_SNRPA	snf	KK107649	Vienna Drosophila Resource Center (VDRC)	104334	snf	CG4528
noi,_Sf3a3	noi	KK101842	Vienna Drosophila Resource Center (VDRC)	105354	noi	CG2925
Mettl14	Mettl14	KK102058	Vienna Drosophila Resource Center (VDRC)	105434	Mettl14	CG7818
mbl	mbl	KK107778	Vienna Drosophila Resource Center (VDRC)	105486	mbl	CG33197
mbl	mbl	KK107778	Vienna Drosophila Resource Center (VDRC)	105486	mbl	CG33197
Sf3b2	Sf3b2	KK101239	Vienna Drosophila Resource Center (VDRC)	105639	Sf3b2	CG3605
Bru1,_Aret	Bru1	KK110026	Vienna Drosophila Resource Center (VDRC)	107459	bru1	CG31762
Prp19	Prp19	KK101335	Vienna Drosophila Resource Center (VDRC)	108575	Prp19	CG5519
Atx2	Atx2	KK100423	Vienna Drosophila Resource Center (VDRC)	108843	Atx2	CG5166
Rm62	Rm62	KK112269	Vienna Drosophila Resource Center (VDRC)	110102	Rm62	CG10279
Rbfox1,_A2BP1	Rbfox1	KK109100	Vienna Drosophila Resource Center (VDRC)	110518	Rbfox1	CG32062
SF1	SF1	GD5176	Vienna Drosophila Resource Center (VDRC)	13425	SF1	CG5836
SF1	SF1	GD5176	Vienna Drosophila Resource Center (VDRC)	13426	SF1	CG5836
How	How	GD13756	Vienna Drosophila Resource Center (VDRC)	1462	how	CG10293
Prp8	Prp8	GD6578	Vienna Drosophila Resource Center (VDRC)	18565	Prp8	CG8877
doa	doa	GD8588	Vienna Drosophila Resource Center (VDRC)	19066	Doa	CG42320
doa	doa	GD8588	Vienna Drosophila Resource Center (VDRC)	20120	Doa	CG42320
noi,_Sf3a3	noi	GD9855	Vienna Drosophila Resource Center (VDRC)	20943	noi	CG2925
noi,_Sf3a3	noi	GD9855	Vienna Drosophila Resource Center (VDRC)	20945	noi	CG2925
Ime4/Mettl3	Mettl3	GD9882	Vienna Drosophila Resource Center (VDRC)	20968	Mettl3	CG5933
doa	doa	GD10146	Vienna Drosophila Resource Center (VDRC)	21294	Doa	CG42320
Prp19	Prp19	GD11681	Vienna Drosophila Resource Center (VDRC)	22146	Prp19	CG5519
Prp19	Prp19	GD11681	Vienna Drosophila Resource Center (VDRC)	22147	Prp19	CG5519
Sf3b2	Sf3b2	GD11027	Vienna Drosophila Resource Center (VDRC)	26250	Sf3b2	CG3605
Sf3b2	Sf3b2	GD11027	Vienna Drosophila Resource Center (VDRC)	26252	Sf3b2	CG3605
U2SURP_(CG9346)	U2SURP	GD14191	Vienna Drosophila Resource Center (VDRC)	27013	U2SURP	CG9346
mbl	mbl	GD13374	Vienna Drosophila Resource Center (VDRC)	28732	mbl	CG33197
mbl	mbl	GD13374	Vienna Drosophila Resource Center (VDRC)	28732	mbl	CG33197
salm	salm	GD1525	Vienna Drosophila Resource Center (VDRC)	3029	salm	CG6464
Sf3a2	Sf3a2	GD7087	Vienna Drosophila Resource Center (VDRC)	31346	Sf3a2	CG10754
Sf3a2	Sf3a2	GD7087	Vienna Drosophila Resource Center (VDRC)	31347	Sf3a2	CG10754
sbr	sbr	GD9182	Vienna Drosophila Resource Center (VDRC)	32690	sbr	CG1664
sbr	sbr	GD9182	Vienna Drosophila Resource Center (VDRC)	32691	sbr	CG1664
Rbm17,_Spf45	Rbm17	GD9411	Vienna Drosophila Resource Center (VDRC)	32948	Spf45	CG17540
Rbm17,_Spf45	Rbm17	GD9411	Vienna Drosophila Resource Center (VDRC)	32949	Spf45	CG17540
snf,_SNRPA	snf	VSH330329	Vienna Drosophila Resource Center (VDRC)	330329	snf	CG4528
YT521-B	YT521-B	VSH330558	Vienna Drosophila Resource Center (VDRC)	330558	Ythdc1	CG12076
Prp6_(CG6841)	Prp6	GD10654	Vienna Drosophila Resource Center (VDRC)	34254	Prp6	CG6841
How	How	KK100775	Vienna Drosophila Resource Center (VDRC)	35810	how	CG10293
How	How	KK100775	Vienna Drosophila Resource Center (VDRC)	37342	how	CG10293
Prp19	Prp19	GD11681	Vienna Drosophila Resource Center (VDRC)	41438	Prp19	CG5519
Bru1,_Aret	Bru1	GD8699	Vienna Drosophila Resource Center (VDRC)	41568	bru1	CG31762
clu	clu	CG13926	Vienna Drosophila Resource Center (VDRC)	42136	clu	CG8443
clu	clu	GD13926	Vienna Drosophila Resource Center (VDRC)	42138	clu	CG8443
Hrb59	rump	GD14202	Vienna Drosophila Resource Center (VDRC)	44659	rump	CG9373
sbr	sbr	GD14541	Vienna Drosophila Resource Center (VDRC)	46117	sbr	CG1664
fand	fand	GD11858	Vienna Drosophila Resource Center (VDRC)	46312	fand	CG6197
doa	doa	GD16021	Vienna Drosophila Resource Center (VDRC)	46449	Doa	CG42320
Rm62	Rm62	GD17219	Vienna Drosophila Resource Center (VDRC)	46908	Rm62	CG10279
Bru1,_Aret	Bru1	GD17093	Vienna Drosophila Resource Center (VDRC)	48237	bru1	CG31762
Mettl14	Mettl14	GD16300	Vienna Drosophila Resource Center (VDRC)	48560	Mettl14	CG7818
me31B	me31B	GD11470	Vienna Drosophila Resource Center (VDRC)	49378	me31B	CG4916
