# Supplementary material for: A Candidate RNAi Screen Reveals Diverse RNA-Binding Protein Phenotypes in Drosophila Flight Muscle
Source: Preprints.org preprint supplement (doi:10.20944/preprints202108.0137.v1), 2021-08-05
Supplement: Supplementary file 4 [file Supplemental_Table_3.xlsx]

## Sheet: guide
Kao et al, Supplmental Table 3 Contents
Tab Name	Figure	Description
screenRBPs_hairpins	Figure2-5	identifier information for all RNAi hairpins targeting RBPs used in this manuscript
geneinfo	Figure2-5	list of 35 genes targeted by hairpins in the RBP screen, includes identifiers and summary of gene data
screen_data	Figure2-5	summarized data of screen data for all hairpins including flight index and confocal phenotypes
FigureS5	FigureS5C	table of data represented in the heatmap of phenotypes for spliceosome components
rawdata	Figure2-5	raw data of flight test values for each hairpin, including N flies tested for each line

## Sheet: screenRBPs_hairpins
Gene	Gene_tested	Category	Hairpin_ID	Stock_Number	SYMBOL	ANNOTATION_SYMBOL
How	How	RBP	TRiPHMC03820	BL55665	how	CG10293
How	How	RBP	GD13756	V1462	how	CG10293
How	How	RBP	KK100775	V35810	how	CG10293
How	How	RBP	KK100775	V37342	how	CG10293
me31B	me31B	RBP	TRiP.HM05052	BL28566	me31B	CG4916
me31B	me31B	RBP	TRiP.HMS00539	BL33675	me31B	CG4916
me31B	me31B	RBP	TRiP.GL00695	BL38923	me31B	CG4916
me31B	me31B	RBP	GD11470	V49378	me31B	CG4916
Rbp9	Rbp9	RBP	KK109093	V101412	Rbp9	CG3151
Hrb59	rump	RBP	GD14202	V44659	rump	CG9373
doa	doa	enzyme, splicing associated (SR protein targets)	TRiP.HMJ03121	BL50903	Doa	CG42320
doa	doa	enzyme, splicing associated (SR protein targets)	KK111879	V102520	Doa	CG42320
doa	doa	enzyme, splicing associated (SR protein targets)	GD8588	V19066	Doa	CG42320
doa	doa	enzyme, splicing associated (SR protein targets)	GD8588	V20120	Doa	CG42320
doa	doa	enzyme, splicing associated (SR protein targets)	GD10146	V21294	Doa	CG42320
doa	doa	enzyme, splicing associated (SR protein targets)	GD16021	V46449	Doa	CG42320
Atx2	Atx2	RBP,_SM	TRiP.HMS01392	BL36114	Atx2	CG5166
Atx2	Atx2	RBP,_SM	TRiP.HMS02726	BL44012	Atx2	CG5166
Atx2	Atx2	RBP,_SM	KK100423	V108843	Atx2	CG5166
Bru1,_Aret	Bru1	RBP,_RRM	TRiP.HMC02374	BL44483	bru1	CG31762
Bru1,_Aret	Bru1	RBP,_RRM	KK110026	V107459	bru1	CG31762
Bru1,_Aret	Bru1	RBP,_RRM	GD8699	V41568	bru1	CG31762
Bru1,_Aret	Bru1	RBP,_RRM	GD17093	V48237	bru1	CG31762
Cdc5	Cdc5	Spliceosome	TRiP.HMC02918	BL44524	Cdc5	CG6905
Cdc5	Cdc5	Spliceosome	TRiP.HMC03948	BL55261	Cdc5	CG6905
clu	clu	RBP,_CLU	CG13926	V42136	clu	CG8443
clu	clu	RBP,_CLU	GD13926	V42138	clu	CG8443
fand	fand	spliceosome	KK101751	V104186	fand	CG6197
fand	fand	spliceosome	GD11858	V46312	fand	CG6197
Hrb87F,_hnRNP_A	Hrb87F	RBP,_RRM,_hnRNP-A,_spliceosome	TRiP.JF01757	BL31244	Hrb87F	CG12749
Hrb87F,_hnRNP_A	Hrb87F	RBP,_RRM,_hnRNP-A,_spliceosome	TRiP.JF01250	BL31472	Hrb87F	CG12749
Hrb87F,_hnRNP_A	Hrb87F	RBP,_RRM,_hnRNP-A,_spliceosome	TRiP.HMC03679	BL52937	Hrb87F	CG12749
Hrb87F,_hnRNP_A	Hrb87F	RBP,_RRM,_hnRNP-A,_spliceosome	KK108162	V100732	Hrb87F	CG12749
mbl	mbl	RBP,_ZnF	TRiP.JF03264	BL29585	mbl	CG33197
mbl	mbl	RBP,_ZnF	GD13374	V28732	mbl	CG33197
mbl	mbl	RBP,_ZnF	KK107778	V105486	mbl	CG33197
mbl	mbl	RBP,_ZnF	TRiP.JF03264	BL29585	mbl	CG33197
mbl	mbl	RBP,_ZnF	KK107778	V105486	mbl	CG33197
mbl	mbl	RBP,_ZnF	GD13374	V28732	mbl	CG33197
Mettl14	Mettl14	RBP	TRiP.HMC05566	BL64547	Mettl14	CG7818
Mettl14	Mettl14	RBP	KK102058	V105434	Mettl14	CG7818
Mettl14	Mettl14	RBP	GD16300	V48560	Mettl14	CG7818
Ime4/Mettl3	Mettl3	RBP	TRiP.GL01126	BL41590	Mettl3	CG5933
Ime4/Mettl3	Mettl3	RBP	TRiP.HMS06011	BL80431	Mettl3	CG5933
Ime4/Mettl3	Mettl3	RBP	TRiP.HMS06028	BL80448	Mettl3	CG5933
Ime4/Mettl3	Mettl3	RBP	TRiP.HMS06030	BL80450	Mettl3	CG5933
Ime4/Mettl3	Mettl3	RBP	5933R	NIG5933R-4	Mettl3	CG5933
Ime4/Mettl3	Mettl3	RBP	GD9882	V20968	Mettl3	CG5933
mub	mub	RBP,_KH	TRiP.HMS00189	BL34872	mub	CG7437
mub	mub	RBP,_KH	TRiP.HMS00189	BL34873	mub	CG7437
mub	mub	RBP,_KH	TRiP.HMS00189	BL34875	mub	CG7437
noi,_Sf3a3	noi	spliceosome	TRiP.HMS00163	BL34845	noi	CG2925
noi,_Sf3a3	noi	spliceosome	KK101842	V105354	noi	CG2925
noi,_Sf3a3	noi	spliceosome	GD9855	V20943	noi	CG2925
noi,_Sf3a3	noi	spliceosome	GD9855	V20945	noi	CG2925
orb	orb	RBP,_RRM	TRiP.JF01864	BL25843	orb	CG10868
orb	orb	RBP,_RRM	TRiP.GL01484	BL43143	orb	CG10868
Prp19	Prp19	spliceosome	TRiP.HMS00652	BL32865	Prp19	CG5519
Prp19	Prp19	spliceosome	KK101335	V108575	Prp19	CG5519
Prp19	Prp19	spliceosome	GD11681	V22146	Prp19	CG5519
Prp19	Prp19	spliceosome	GD11681	V22147	Prp19	CG5519
Prp19	Prp19	spliceosome	GD11681	V41438	Prp19	CG5519
Prp6_(CG6841)	Prp6	spliceosome	TRiP.HMC03484	BL51909	Prp6	CG6841
Prp6_(CG6841)	Prp6	spliceosome	GD10654	V34254	Prp6	CG6841
Prp8	Prp8	spliceosome	TRiP.HMS01297	BL34622	Prp8	CG8877
Prp8	Prp8	spliceosome	GD6578	V18565	Prp8	CG8877
Rbfox1,_A2BP1	Rbfox1	RBP	TRiP.JF02600	BL27286	Rbfox1	CG32062
Rbfox1,_A2BP1	Rbfox1	RBP	KK109100	V110518	Rbfox1	CG32062
Rbfox,_A2BP1	Rbfox1	RBP,_RRM	TRiP.HMS00478	BL32476	Rbfox1	CG32062
Rbm17,_Spf45	Rbm17	RBM,_RRM	TRiP.HMS02351	BL41954	Spf45	CG17540
Rbm17,_Spf45	Rbm17	RBM,_RRM	GD9411	V32948	Spf45	CG17540
Rbm17,_Spf45	Rbm17	RBM,_RRM	GD9411	V32949	Spf45	CG17540
Rbp9	Rbp9	RBM,_RRM	TRiP.JF03084	BL28669	Rbp9	CG3151
Rbp9	Rbp9	RBM,_RRM	TRiP.GL01167	BL42796	Rbp9	CG3151
Rm62	Rm62	RBP,_RNA_helicase	TRiP.JF01385	BL31395	Rm62	CG10279
Rm62	Rm62	RBP,_RNA_helicase	TRiP.HMS00144	BL34829	Rm62	CG10279
Rm62	Rm62	RBP,_RNA_helicase	KK112269	V110102	Rm62	CG10279
Rm62	Rm62	RBP,_RNA_helicase	GD17219	V46908	Rm62	CG10279
salm	salm	TF	GD1525	V3029	salm	CG6464
Sart1_(CG6686)	Sart1	Spliceosome	TRiP.HMC03913	BL55202	Sart1	CG6686
sbr	sbr	RBP,_nuclear_export_factor	KK100882	V103715	sbr	CG1664
sbr	sbr	RBP,_nuclear_export_factor	GD9182	V32690	sbr	CG1664
sbr	sbr	RBP,_nuclear_export_factor	GD9182	V32691	sbr	CG1664
sbr	sbr	RBP,_nuclear_export_factor	GD14541	V46117	sbr	CG1664
SF1	SF1	RBP,_KH,_Znf,_spliceosome	TRiP.JF02871	BL28036	SF1	CG5836
SF1	SF1	RBP,_KH,_Znf,_spliceosome	TRiP.HMC03680	BL52938	SF1	CG5836
SF1	SF1	RBP,_KH,_Znf,_spliceosome	GD5176	V13425	SF1	CG5836
SF1	SF1	RBP,_KH,_Znf,_spliceosome	GD5176	V13426	SF1	CG5836
Sf3a2	Sf3a2	Spliceosome	TRiP.HMC03799	BL55650	Sf3a2	CG10754
Sf3a2	Sf3a2	Spliceosome	GD7087	V31346	Sf3a2	CG10754
Sf3a2	Sf3a2	Spliceosome	GD7087	V31347	Sf3a2	CG10754
Sf3b1	Sf3b1	spliceosome	TRiP.HMS00055	BL33650	Sf3b1	CG2807
Sf3b2	Sf3b2	Spliceosome	TRiP.HMS00056	BL33651	Sf3b2	CG3605
Sf3b2	Sf3b2	Spliceosome	KK101239	V105639	Sf3b2	CG3605
Sf3b2	Sf3b2	Spliceosome	GD11027	V26250	Sf3b2	CG3605
Sf3b2	Sf3b2	Spliceosome	GD11027	V26252	Sf3b2	CG3605
Sf3b3	Sf3b3	Spliceosome	TRiP.HMS00614	BL33731	Sf3b3	CG13900
Smn	Smn	RBP,_Tudor	TRiP.HMC03832	BL55158	Smn	CG16725
snf,_SNRPA	snf	RBP,_RRM,_spliceosome	TRiP.HMC03197	BL51459	snf	CG4528
snf,_SNRPA	snf	RBP,_RRM,_spliceosome	TRiP.HMC04200	BL55914	snf	CG4528
snf,_SNRPA	snf	RBP,_RRM,_spliceosome	KK107649	V104334	snf	CG4528
snf,_SNRPA	snf	RBP,_RRM,_spliceosome	VSH330329	V330329	snf	CG4528
Spx,_Sf3b4	Spx	RBP,_RRM,_spliceosome	TRiP.HMJ23875	BL62421	Spx	CG3780
U2SURP_(CG9346)	U2SURP	Spliceosome	TRiP.HMC04119	BL56898	U2SURP	CG9346
U2SURP_(CG9346)	U2SURP	Spliceosome	GD14191	V27013	U2SURP	CG9346
YT521-B	YT521-B	RBP	TRiP.HMS01302	BL34627	Ythdc1	CG12076
YT521-B	YT521-B	RBP	VSH330558	V330558	Ythdc1	CG12076

## Sheet: geneinfo
gene_symbol	num_transcripts	gene_type	FBgn	gene_fullname	annotation_ID	transcript_type	location_max	location_min	number_transcripts	number_proteins	gene_length	SYMBOL	gene_phenotype_strongest	gene_phenotype_avg	NAME	SYMBOL_SYNONYMS	FBID_KEY	ANNOTATION_SYMBOL	SpliceosomeSimple	SpliceosomeDatabase	RNABD	Interpro_Domains	GO_BIOLOGICAL_PROCESS	GO_CELLULAR_COMPONENT	GO_MOLECULAR_FUNCTION	H_SAPIENS_ORTHOLOGS	M_MUSCULUS_ORTHOLOGS		NAME_SYNONYMS	SECONDARY_IDS	UNIPROT_PROTEIN_DOMAINS
Atx2	4	protein_coding_gene	FBgn0041188	Ataxin-2	CG5166	mRNA	15417277	15408423	4	3	8854	Atx2	lethallatepupal	lethallatepupal	Ataxin-2	dAtx2 <newline> CG5166 <newline> SCA2 <newline> Datx2 <newline> GH27029 <newline> dSCA2 <newline> Sca2 <newline> l(3)06490 <newline> atx2 <newline> anon-EST:fe2E1 <newline> BEST:GH27029 <newline> anon-WO0140519.1 <newline> anon-WO0118547.351 <newline> Atx2 <newline> CG5166a <newline> ATX2 <newline> Atxain-2 <newline> Atx-2 <newline> atx-2 <newline> CG43368 <newline> DAtx2	FBgn0041188	CG5166	NO	NO	ZnF	Zinc finger C2H2-type	short-term memory ; GO:0007614 | NOT inferred from mutant phenotype <newline> long-term memory ; GO:0007616 | inferred from mutant phenotype <newline> locomotor rhythm ; GO:0045475 | inferred from mutant phenotype <newline> positive regulation of neuron death ; GO:1901216 | inferred from mutant phenotype <newline> chaeta development ; GO:0022416 | inferred from mutant phenotype <newline> habituat…	cytoplasmic stress granule ; GO:0010494 | inferred from direct assay <newline> ribonucleoprotein granule ; GO:0035770 | inferred from direct assay <newline> cytoplasmic stress granule ; GO:0010494 | inferred from biological aspect of ancestor with PANTHER:PTN000304339 <newline> cytoplasm ; GO:0005737 | inferred from high throughput direct assay <newline> cytoplasm ; GO:0005737 | inferred from dir…	RNA binding ; GO:0003723 | inferred from direct assay <newline> protein binding ; GO:0005515 | inferred from physical interaction with tyf <newline> RNA binding ; GO:0003723 | inferred from biological aspect of ancestor with PANTHER:PTN000304339	Hsap\ATXN2L <newline> Hsap\ATXN2	Mmus\Atxn2l <newline> Mmus\Atxn2 <newline> Mmus\Maml1		dAtaxin-2 <newline> Ataxin-2 <newline> ataxin-2 <newline> anon-fast-evolving-2E1 <newline> Dataxin-2 <newline> Ataxin 2 <newline> ATAXIN-2 <newline> Ataxin2	FBgn0010892 <newline> FBgn0025221 <newline> FBgn0038338 <newline> FBgn0044786 <newline> FBgn0062074 <newline> FBgn0063367	Belongs to the ataxin-2 family.
bru1	10	protein_coding_gene	FBgn0000114	bruno 1	CG31762	mRNA	12313438	12175004	10	5	138434	bru1	flightless	flightless	bruno 1	Bru <newline> bru <newline> bruno <newline> arrest/Bruno <newline> CG6319 <newline> Dm Bru <newline> NEST:bs34h11 <newline> NEST:bs01g04 <newline> ms(2)01284 <newline> CG31762 <newline> BcDNA:GM15173 <newline> Bruno <newline> Aret <newline> ARET <newline> aret/bruno1 <newline> aret <newline> bru1 <newline> bru-1	FBgn0000114	CG31762	NO	NO	RRM	RNA recognition motif domain	negative regulation of translation ; GO:0017148 | inferred from mutant phenotype <newline> female germ-line stem cell population maintenance ; GO:0036099 | inferred from genetic interaction with enok <newline> regulation of alternative mRNA splicing, via spliceosome ; GO:0000381 | inferred from mutant phenotype <newline> regulation of myofibril size ; GO:0014881 | inferred from mutant phenotype <…	nuclear body ; GO:0016604 | inferred from direct assay <newline> ribonucleoprotein complex ; GO:1990904 | inferred from biological aspect of ancestor with PANTHER:PTN002768817 <newline> nucleus ; GO:0005634 | inferred by curator from GO:0000381 <newline> nucleus ; GO:0005634 | inferred from direct assay <newline> nucleus ; GO:0005634 | inferred from genetic interaction with sbr <newline> cytoplas…	protein binding ; GO:0005515 | inferred from physical interaction with apt <newline> mRNA binding ; GO:0003729 | traceable author statement <newline> mRNA 3'-UTR binding ; GO:0003730 | inferred from direct assay <newline> mRNA binding ; GO:0003729 | inferred from biological aspect of ancestor with PANTHER:PTN000609546 <newline> mRNA binding ; GO:0003729 | non-traceable author statement <newline> …	Hsap\CELF3 <newline> Hsap\CELF4 <newline> Hsap\CELF1 <newline> Hsap\CELF2 <newline> Hsap\CELF6 <newline> Hsap\CELF5	Mmus\Celf3 <newline> Mmus\Celf5 <newline> Mmus\Celf4 <newline> Mmus\Celf1 <newline> Mmus\Celf2 <newline> Mmus\Celf6		bruno <newline> Bruno <newline> arrest <newline> bruno 1	FBgn0015367 <newline> FBgn0045095 <newline> FBgn0045436 <newline> FBgn0051762 <newline> FBgn0063197	-
Cdc5	2	protein_coding_gene	FBgn0265574	Cell division cycle 5	CG6905	mRNA	361383	357851	2	1	3532	Cdc5	lethal	weakflier	Cell division cycle 5	CG6905 <newline> Cdc5 <newline> cef1 <newline> cdc5-like <newline> Cdc5Dm <newline> cdc5	FBgn0265574	CG6905	BCP	B complex, Bact complex, C complex, P complex, PRP19 complex	Myb	SANT/Myb domain	mRNA splicing, via spliceosome ; GO:0000398 | inferred from sequence or structural similarity with SGD:S000004826 <newline> mRNA splicing, via spliceosome ; GO:0000398 | inferred by curator from GO:0071011,GO:0071013	spliceosomal complex ; GO:0005681 | inferred from sequence or structural similarity with SGD:S000004826 <newline> catalytic step 2 spliceosome ; GO:0071013 | inferred from high throughput direct assay <newline> Prp19 complex ; GO:0000974 | inferred from direct assay <newline> precatalytic spliceosome ; GO:0071011 | inferred from high throughput direct assay	RNA binding ; GO:0003723 | inferred from sequence or structural similarity with HGNC:1743 <newline> DNA binding ; GO:0003677 | inferred from electronic annotation with InterPro:IPR009057	Hsap\CDC5L <newline> Hsap\MYBL2 <newline> Hsap\SNAPC4 <newline> Hsap\TTF1 <newline> Hsap\MYB <newline> Hsap\DMTF1 <newline> Hsap\MYBL1 <newline> Hsap\SLC16A1	Mmus\Cdc5l <newline> Mmus\Mybl2 <newline> Mmus\Myb <newline> Mmus\Dmtf1 <newline> Mmus\4932411N23Rik <newline> Mmus\Mybl1 <newline> Mmus\Ttf1 <newline> Mmus\Snapc4 <newline> Mmus\Gm9049 <newline> Mmus\Gm9046 <newline> Mmus\Gm9048 <newline> Mmus\Gm32717 <newline> Mmus\Gm9040		cdc5-like <newline> cdc5 <newline> Cell division cycle 5 ortholog <newline> Cell division cycle 5	FBgn0035136 <newline> FBgn0025183	-
CG6686	3	protein_coding_gene	FBgn0032388		CG6686	mRNA	11988039	11984327	3	3	3712	CG6686	lethalearly	lethalearly	CG6686	CG6686 <newline> SART1	FBgn0032388	CG6686	B	B complex, tri-snRNA	NA	SNU66/SART1 family	mRNA cis splicing, via spliceosome ; GO:0045292 | inferred from biological aspect of ancestor with PANTHER:PTN000365724 <newline> maturation of 5S rRNA ; GO:0000481 | inferred from biological aspect of ancestor with PANTHER:PTN000365724 <newline> positive regulation of gene expression ; GO:0010628 | inferred from mutant phenotype <newline> mRNA splicing, via spliceosome ; GO:0000398 | inferred by…	U4/U6 x U5 tri-snRNP complex ; GO:0046540 | inferred from biological aspect of ancestor with PANTHER:PTN000365724 <newline> precatalytic spliceosome ; GO:0071011 | inferred from high throughput direct assay	RNA binding ; GO:0003723 | inferred from sequence or structural similarity with HGNC:10538	Hsap\SART1 <newline> Hsap\RBM25	Mmus\Sart1		-	-	-
CG6841	2	protein_coding_gene	FBgn0036828		CG6841	mRNA	18908974	18905372	2	1	3602	CG6841	weakflier	no	CG6841	Prp6 <newline> BcDNA:LD43276 <newline> CG6841	FBgn0036828	CG6841	B	B complex, U5 snRNP, tri-snRNP	HAT	HAT repeat	regulation of alternative mRNA splicing, via spliceosome ; GO:0000381 | inferred from high throughput mutant phenotype <newline> mRNA splicing, via spliceosome ; GO:0000398 | inferred from sequence or structural similarity with SGD:S000000259 <newline> spliceosomal tri-snRNP complex assembly ; GO:0000244 | inferred from biological aspect of ancestor with PANTHER:PTN000133809 <newline> mRNA splici…	U4/U6 x U5 tri-snRNP complex ; GO:0046540 | inferred from biological aspect of ancestor with PANTHER:PTN000133809 <newline> catalytic step 2 spliceosome ; GO:0071013 | inferred from biological aspect of ancestor with PANTHER:PTN000133809 <newline> catalytic step 2 spliceosome ; GO:0071013 | inferred from high throughput direct assay <newline> nucleus ; GO:0005634 | inferred by curator from GO:000…	RNA binding ; GO:0003723 | inferred from sequence or structural similarity with HGNC:15860	Hsap\PRPF6	Mmus\Prpf6		-	-	-
CG9346	1	protein_coding_gene	FBgn0034572		CG9346	mRNA	21015628	21011970	1	1	3658	CG9346	flightless	weakflier	CG9346	cg9346 <newline> CG9346	FBgn0034572	CG9346	A	A complex, 17S U2 snRNP associated	RRM	RNA recognition motif domain ; CID domain ; SWAP/Surp	RNA processing ; GO:0006396 | inferred from electronic annotation with InterPro:IPR000061 <newline> biological_process ; GO:0008150 | no biological data available	nucleoplasm ; GO:0005654 | inferred from sequence or structural similarity with HGNC:30855	RNA binding ; GO:0003723 | inferred from electronic annotation with InterPro:IPR000061 <newline> mRNA binding ; GO:0003729 | inferred from sequence or structural similarity	Hsap\U2SURP <newline> Hsap\SCAF4	Mmus\U2surp <newline> Mmus\Scaf4		-	-	-
clu	2	protein_coding_gene	FBgn0034087	clueless	CG8443	mRNA	16194277	16186584	2	2	7693	clu	lethalpharate	flightless	clueless	anon-WO0118547.143 <newline> clu <newline> CG8443 <newline> Clu	FBgn0034087	CG8443	NO	NO	NA	CLU domain ; GSKIP domain	mitochondrion localization ; GO:0051646 | inferred from mutant phenotype <newline> asymmetric neuroblast division ; GO:0055059 | inferred from mutant phenotype inferred from genetic interaction with l(2)gl inferred from genetic interaction with park inferred from physical interaction with baz inferred from physical interaction with aPKC <newline> intracellular distribution of mitochondria ; GO:00…	mitochondrion ; GO:0005739 | inferred from direct assay <newline> Golgi apparatus ; GO:0005794 | inferred from direct assay <newline> cytoplasm ; GO:0005737 | inferred from biological aspect of ancestor with PANTHER:PTN000287978 <newline> cytoplasm ; GO:0005737 | inferred from direct assay <newline> mitotic spindle ; GO:0072686 | inferred from direct assay <newline> outer mitochondrial membrane p…	mRNA binding ; GO:0003729 | inferred from biological aspect of ancestor with PANTHER:PTN000287979 <newline> ribosome binding ; GO:0043022 | inferred from direct assay <newline> mRNA binding ; GO:0003729 | inferred from direct assay	Hsap\CLUH	Mmus\Cluh		clueless <newline> Clueless	FBgn0062217	Belongs to the CLU family.
Doa	15	protein_coding_gene	FBgn0265998	Darkener of apricot	CG42320	mRNA	28922772	28888073	15	11	34699	Doa	lethalpupal	lethallatepupal	Darkener of apricot	Msu	FBgn0265998	CG42320	NO	NO	NA	Serine/threonine-protein kinase	regulation of alternative mRNA splicing, via spliceosome			Hsap\CLK2	Mmus\Clk2
fand	1	protein_coding_gene	FBgn0033859	fandango	CG6197	mRNA	13596557	13593644	1	1	2913	fand	lethal	lethal	fandango	fand <newline> CG6197 <newline> XAB2 <newline> Xab2 <newline> Prp5 <newline> fas <newline> l(2)5488 <newline> l(2)05488 <newline> Fand	FBgn0033859	CG6197	BCP	B complex, Bact complex, C complex, P complex, PRP19 related	HAT	HAT repeat	regulation of alternative mRNA splicing, via spliceosome ; GO:0000381 | inferred from high throughput mutant phenotype <newline> generation of catalytic spliceosome for first transesterification step ; GO:0000349 | inferred from biological aspect of ancestor with PANTHER:PTN000133873 <newline> Malpighian tubule morphogenesis ; GO:0007443 | inferred from mutant phenotype <newline> morphogenesis of…	U2-type catalytic step 2 spliceosome ; GO:0071007 | inferred from biological aspect of ancestor with PANTHER:PTN000133873 <newline> catalytic step 2 spliceosome ; GO:0071013 | inferred from biological aspect of ancestor with PANTHER:PTN000133873 <newline> Prp19 complex ; GO:0000974 | inferred from direct assay <newline> nucleus ; GO:0005634 | inferred by curator from GO:0000381 <newline> precatal…	molecular_function ; GO:0003674 | no biological data available	Hsap\XAB2 <newline> Hsap\HEATR6	Mmus\Xab2 <newline> Mmus\Heatr6		Complementation group 7 <newline> fand <newline> fandango <newline> faint sausage	FBgn0010603	Belongs to the crooked-neck family.
how	6	protein_coding_gene	FBgn0264491	held out wings	CG10293	mRNA	22079321	22042191	6	5	37130	how	lethalearly	lethalpupal	held out wings	who <newline> struthio <newline> l(3)j5B5 <newline> anon- EST:Liang-2.39 <newline> qkr93F	FBgn0264491	CG10293	NO	NO	KH	K Homology domain	regulation of alternative mRNA splicing, via spliceosome			Hsap\QKI	Mmus\Qk
Hrb87F	4	protein_coding_gene	FBgn0004237	Heterogeneous nuclear ribonucleoprotein at 87F	CG12749	mRNA	13660531	13656846	4	1	3685	Hrb87F	lethal	flightless	Heterogeneous nuclear ribonucleoprotein at 87F	hrp36 <newline> Hrb87f <newline> CG12749 <newline> HRP36 <newline> P11 <newline> Q16 <newline> Q14 <newline> Hrp36 <newline> p38 <newline> P11/Hrb87F <newline> Hrb87Fa <newline> HRB87F/hrp36 <newline> Hrb85CD <newline> Hrb2 <newline> Hrb87F <newline> hnRNP36 <newline> hnRNPA1 <newline> HRB87F <newline> hnRNP A2/B1 <newline> hnRNPA1/A2 <newline> hnRNPA2	FBgn0004237	CG12749	A	A complex, hnRNP	RRM	RNA recognition motif domain ; BOULE/DAZ family	positive regulation of mRNA splicing, via spliceosome ; GO:0048026 | inferred from biological aspect of ancestor with PANTHER:PTN002689981 <newline> spermatogenesis ; GO:0007283 | inferred from biological aspect of ancestor with PANTHER:PTN001924359 <newline> regulation of RNA metabolic process ; GO:0051252 | inferred from biological aspect of ancestor with PANTHER:PTN002689974 <newline> female g…	ribonucleoprotein complex ; GO:1990904 | inferred from sequence or structural similarity with HGNC:5031 inferred from direct assay inferred from physical interaction with sqd <newline> nucleoplasm ; GO:0005654 | inferred from direct assay <newline> polytene chromosome puff ; GO:0005703 | inferred from direct assay <newline> omega speckle ; GO:0035062 | inferred from direct assay <newline> nucleus…	poly(U) RNA binding ; GO:0008266 | inferred from biological aspect of ancestor with PANTHER:PTN002689981 <newline> mRNA binding ; GO:0003729 | inferred from sequence or structural similarity <newline> RNA binding ; GO:0003723 | inferred from biological aspect of ancestor with PANTHER:PTN002689974 <newline> mRNA 3'-UTR binding ; GO:0003730 | inferred from biological aspect of ancestor with PANTHER…	Hsap\RALY <newline> Hsap\DAZL <newline> Hsap\EIF4H <newline> Hsap\ZCRB1 <newline> Hsap\TRA2A <newline> Hsap\HNRNPD <newline> Hsap\BOLL <newline> Hsap\HNRNPA0 <newline> Hsap\HNRNPA1 <newline> Hsap\HNRNPA2B1 <newline> Hsap\HNRNPA1L2 <newline> Hsap\HNRNPAB <newline> Hsap\TRNAU1AP <newline> Hsap\RBM3 <newline> Hsap\HNRNPA3 <newline> Hsap\RBM34 <newline> Hsap\EIF4B <newline> Hsap\SRSF12 <newline> Hsap…	Mmus\Hnrnpa0 <newline> Mmus\Dazl <newline> Mmus\Larp7 <newline> Mmus\Trnau1ap <newline> Mmus\Tra2a <newline> Mmus\Rbm3 <newline> Mmus\Hnrnpa1 <newline> Mmus\Rbm34 <newline> Mmus\Eif4h <newline> Mmus\Raly <newline> Mmus\Gm9833 <newline> Mmus\Srsf12 <newline> Mmus\Zcrb1 <newline> Mmus\Boll <newline> Mmus\Cirbp <newline> Mmus\Srsf10 <newline> Mmus\Ralyl <newline> Mmus\Hnrnpab <newline> Mmus\Hnrnpc <…		Heterogeneous nuclear ribonucleoprotein at 85CD <newline> hnRNA-binding protein 2 <newline> Heterogeneous nuclear ribonucleoprotein at 87F	FBgn0010230	-
mbl	18	protein_coding_gene	FBgn0265487	muscleblind	CG33197	mRNA	17379376	17216549	18	18	162827	mbl	lethalpupal	lethalpupal	muscleblind	mbl <newline> Mbl <newline> mbn <newline> chst <newline> mm <newline> CG14477 <newline> n(2)k07110 <newline> l(2)k01212 <newline> l(2)01038 <newline> l(2)k05507 <newline> CG10941 <newline> CG33197 <newline> chaste <newline> cht <newline> BG01127 <newline> mb1	FBgn0265487	CG33197	NO	NO	ZnF	Zinc finger CCCH-type	apoptotic process ; GO:0006915 | inferred from direct assay <newline> regulation of alternative mRNA splicing, via spliceosome ; GO:0000381 | inferred from biological aspect of ancestor with PANTHER:PTN001398042 <newline> regulation of alternative mRNA splicing, via spliceosome ; GO:0000381 | inferred from mutant phenotype <newline> regulation of gene expression ; GO:0010468 | inferred from mutan…	cytoplasm ; GO:0005737 | inferred from direct assay <newline> nucleus ; GO:0005634 | inferred from biological aspect of ancestor with PANTHER:PTN001398042 <newline> H zone ; GO:0031673 | inferred from direct assay <newline> Z disc ; GO:0030018 | inferred from direct assay <newline> nucleus ; GO:0005634 | inferred from direct assay <newline> perinuclear region of cytoplasm ; GO:0048471 | inferred …	nucleic acid binding ; GO:0003676 | non-traceable author statement <newline> RNA binding ; GO:0003723 | inferred from biological aspect of ancestor with PANTHER:PTN001398042 <newline> metal ion binding ; GO:0046872 | inferred from electronic annotation with InterPro:IPR000571	Hsap\MBNL3 <newline> Hsap\MBNL2 <newline> Hsap\MBNL1 <newline> Hsap\ZC3H10	Mmus\Mbnl1 <newline> Mmus\Mbnl3 <newline> Mmus\Mbnl2 <newline> Mmus\Zc3h10		Muscleblind <newline> muscleblind <newline> MUSCLEBLIND <newline> mindmelt <newline> chaste <newline> BG01127	FBgn0053197 <newline> FBgn0261642 <newline> FBgn0010471 <newline> FBgn0015514 <newline> FBgn0020274 <newline> FBgn0022250 <newline> FBgn0034208 <newline> FBgn0020555 <newline> FBgn0070016	Belongs to the muscleblind family.
me31B	2	protein_coding_gene	FBgn0004419	maternal expression at 31B	CG4916	mRNA	10242172	10239341	2	2	2831	me31B	lethalpupal	lethalpupal	maternal expression at 31B	l(2)k06607	FBgn0004419	CG4916	NO	NO	heli	RNA helicase, DEAD-box type, Q motif	cytoplasmic mRNA processing body assembly			Hsap\DDX6	Mmus\Ddx6
Mettl14	1	protein_coding_gene	FBgn0032016	Methyltransferase like 14	CG7818	mRNA	8309961	8308427	1	1	1534	Mettl14	lethal	weakflier	Methyltransferase like 14	Mettl14 <newline> dKAR4 <newline> CG7818 <newline> mettl14 <newline> dMettl14 <newline> METTL14	FBgn0032016	CG7818	NO	NO	MeT	S-adenosyl-L-methionine-dependent methyltransferase	mRNA methylation ; GO:0080009 | inferred from mutant phenotype <newline> RNA methylation ; GO:0001510 | inferred from sequence or structural similarity with UniProtKB:Q86U44 <newline> regulation of alternative mRNA splicing, via spliceosome ; GO:0000381 | inferred from mutant phenotype <newline> regulation of alternative mRNA splicing, via spliceosome ; GO:0000381 | inferred from direct assay <ne…	cytoplasm ; GO:0005737 | inferred from direct assay <newline> RNA N6-methyladenosine methyltransferase complex ; GO:0036396 | inferred from direct assay <newline> nucleus ; GO:0005634 | inferred from sequence or structural similarity with UniProtKB:Q86U44 <newline> nucleus ; GO:0005634 | inferred from direct assay	mRNA (N6-adenosine)-methyltransferase activity ; GO:0001734 | inferred from mutant phenotype <newline> mRNA (N6-adenosine)-methyltransferase activity ; GO:0001734 | inferred from sequence or structural similarity with UniProtKB:Q86U44	Hsap\METTL14 <newline> Hsap\METTL3	Mmus\Mettl14 <newline> Mmus\Mettl3		Methyltransferase like 14	-	Belongs to the MT-A70-like family.
Mettl3	1	protein_coding_gene	FBgn0039139	Methyltransferase like 3	CG5933	mRNA	24034257	24032157	1	1	2100	Mettl3	flightless	weakflier	Methyltransferase like 3	IME4 <newline> ime4 <newline> CG5933 <newline> Mta70 <newline> MTA70 <newline> Mettl3 <newline> dIME4 <newline> METTL3 <newline> Ime4 <newline> Dm ime4	FBgn0039139	CG5933	NO	NO	MeT	S-adenosyl-L-methionine-dependent methyltransferase	dosage compensation ; GO:0007549 | inferred from mutant phenotype inferred from genetic interaction with Sxl <newline> mRNA splicing, via spliceosome ; GO:0000398 | inferred from biological aspect of ancestor with PANTHER:PTN000981980 <newline> ovarian follicle cell development ; GO:0030707 | inferred from mutant phenotype <newline> sex determination ; GO:0007530 | inferred from genetic interacti…	RNA N6-methyladenosine methyltransferase complex ; GO:0036396 | inferred from biological aspect of ancestor with PANTHER:PTN000302828 <newline> nucleus ; GO:0005634 | inferred from direct assay <newline> nucleus ; GO:0005634 | inferred from biological aspect of ancestor with PANTHER:PTN000302827 <newline> RNA N6-methyladenosine methyltransferase complex ; GO:0036396 | inferred from direct assay <…	mRNA (N6-adenosine)-methyltransferase activity ; GO:0001734 | inferred from mutant phenotype <newline> methyltransferase activity ; GO:0008168 | inferred from biological aspect of ancestor with PANTHER:PTN000302827 <newline> mRNA (N6-adenosine)-methyltransferase activity ; GO:0001734 | inferred from sequence or structural similarity with UniProtKB:Q86U44 <newline> mRNA (2'-O-methyladenosine-N6-)-…	Hsap\METTL3 <newline> Hsap\METTL14	Mmus\Mettl3 <newline> Mmus\Mettl14		Inducer of Meiosis 4 <newline> Mta70 homologue <newline> Inducer of MEiosis 4 homolog <newline> Inducer of meiosis 4 <newline> Methyltransferase like 3	-	Belongs to the MT-A70-like family.
mub	12	protein_coding_gene	FBgn0262737	mushroom-body expressed	CG7437	mRNA	21932702	21844788	12	10	87914	mub	lethal	flightless	mushroom-body expressed	mub <newline> MUB <newline> Mub <newline> CG7437 <newline> l(3)04093 <newline> l(3)j8B3 <newline> l(3)j6B10 <newline> anon-WO0172774.37 <newline> anon-WO0172774.36 <newline> anon-WO0172774.35 <newline> anon-WO0172774.33 <newline> MRE17	FBgn0262737	CG7437	NO	NO	KH	K Homology domain	regulation of gene expression ; GO:0010468 | inferred from biological aspect of ancestor with PANTHER:PTN000032600 <newline> regulation of RNA metabolic process ; GO:0051252 | inferred from biological aspect of ancestor with PANTHER:PTN000032816 <newline> regulation of alternative mRNA splicing, via spliceosome ; GO:0000381 | inferred from mutant phenotype inferred from high throughput mutant phe…	cytoplasm ; GO:0005737 | inferred from biological aspect of ancestor with PANTHER:PTN000032600 <newline> nucleus ; GO:0005634 | inferred from biological aspect of ancestor with PANTHER:PTN000032600 <newline> nucleus ; GO:0005634 | inferred by curator from GO:0000381	mRNA binding ; GO:0003729 | inferred from biological aspect of ancestor with PANTHER:PTN000032600	Hsap\FUBP1 <newline> Hsap\NOVA1 <newline> Hsap\IGF2BP2 <newline> Hsap\PCBP3 <newline> Hsap\FUBP3 <newline> Hsap\IGF2BP1 <newline> Hsap\PCBP1 <newline> Hsap\IGF2BP3 <newline> Hsap\PCBP2 <newline> Hsap\MIR3940 <newline> Hsap\PCBP4 <newline> Hsap\HNRNPK	Mmus\Fubp1 <newline> Mmus\Nova1 <newline> Mmus\Igf2bp2 <newline> Mmus\Pcbp3 <newline> Mmus\Fubp3 <newline> Mmus\Igf2bp1 <newline> Mmus\Pcbp1 <newline> Mmus\Igf2bp3 <newline> Mmus\Pcbp2 <newline> Mmus\Khsrp <newline> Mmus\Pcbp4 <newline> Mmus\Hnrnpk		mushroom body expressed <newline> mushroom bodies <newline> mushroom-body expressed <newline> mRNA-like ncRNA in embryogenesis 17 <newline> Mushroom-body expressed <newline> poly (rC) binding protein	FBgn0014362 <newline> FBgn0010834 <newline> FBgn0011394 <newline> FBgn0011408 <newline> FBgn0046394 <newline> FBgn0046395 <newline> FBgn0046396 <newline> FBgn0046397 <newline> FBgn0086548	-
noi	1	protein_coding_gene	FBgn0014366	noisette	CG2925	mRNA	5591459	5589601	1	1	1858	noi	lethalearly	lethalearly	noisette	CG2925 <newline> SF3a[60] <newline> ms3225 <newline> l(3)j3E7 <newline> U2 <newline> noi <newline> Noi <newline> SF3A3	FBgn0014366	CG2925	ABCP	17S U2 snRNP, A complex, B complex, Bact complex, C complex, P complex	ZnF	SF3A3 domain ; zinc finger C2H2-type ; splicing factor SF3a60 binding domain	fertilization ; GO:0009566 | inferred from mutant phenotype <newline> mRNA splicing, via spliceosome ; GO:0000398 | inferred from sequence or structural similarity with SGD:S000002188 <newline> mRNA splicing, via spliceosome ; GO:0000398 | inferred by curator from GO:0071011,GO:0071013 <newline> mitotic cell cycle ; GO:0000278 | inferred from high throughput mutant phenotype <newline> mRNA splici…	catalytic step 2 spliceosome ; GO:0071013 | inferred from high throughput direct assay <newline> spliceosomal complex ; GO:0005681 | inferred from biological aspect of ancestor with PANTHER:PTN000300247 <newline> precatalytic spliceosome ; GO:0071011 | inferred from high throughput direct assay <newline> U2 snRNP ; GO:0005686 | inferred from sequence or structural similarity with SGD:S000002188	zinc ion binding ; GO:0008270 | inferred from electronic annotation with InterPro:IPR000690 <newline> RNA binding ; GO:0003723 | inferred from sequence or structural similarity with HGNC:10767 <newline> RNA binding ; GO:0003723 | inferred from biological aspect of ancestor with PANTHER:PTN000300247	Hsap\SF3A3	Mmus\Sf3a3		noisette <newline> Noisette	FBgn0011357	Belongs to the SF3A3 family.
orb	7	protein_coding_gene	FBgn0004882	oo18 RNA-binding protein	CG10868	mRNA	23280856	23260610	7	4	20246	orb	no	no	oo18 RNA-binding protein	orb <newline> Orb <newline> 151666_s_at <newline> ORB <newline> oo18 <newline> fs(3)00107 <newline> CG10868 <newline> oo18 RNA-binding protein <newline> Oo18 <newline> Orb1	FBgn0004882	CG10868	NO	NO	RRM	RNA recognition motif domain ; Cytoplasmic polyadenylation element-binding protein, ZZ domain	pole plasm oskar mRNA localization ; GO:0045451 | inferred from mutant phenotype <newline> regulation of oskar mRNA translation ; GO:0046011 | inferred from mutant phenotype <newline> mRNA polyadenylation ; GO:0006378 | inferred from mutant phenotype <newline> dorsal/ventral axis specification, ovarian follicular epithelium ; GO:0008069 | inferred from mutant phenotype inferred from genetic inter…	cytoplasm ; GO:0005737 | inferred from direct assay <newline> cell cortex ; GO:0005938 | inferred from direct assay <newline> messenger ribonucleoprotein complex ; GO:1990124 | inferred from biological aspect of ancestor with PANTHER:PTN000286163 <newline> nucleus ; GO:0005634 | inferred from biological aspect of ancestor with PANTHER:PTN000286163 <newline> synapse ; GO:0045202 | inferred from bi…	translation factor activity, RNA binding ; GO:0008135 | inferred from biological aspect of ancestor with PANTHER:PTN000286163 <newline> protein binding ; GO:0005515 | inferred from physical interaction with bru1 inferred from physical interaction with BicC <newline> translation repressor activity, mRNA regulatory element binding ; GO:0000900 | inferred from biological aspect of ancestor with PANT…	Hsap\CPEB1 <newline> Hsap\CPEB4 <newline> Hsap\CPEB2 <newline> Hsap\CPEB3 <newline> Hsap\AP3B2	Mmus\Cpeb1 <newline> Mmus\Cpeb4 <newline> Mmus\Cpeb3 <newline> Mmus\Cpeb2		oo18 RNA-binding protein <newline> ORB <newline> oo18 RNA binding <newline> Oo18 RNA-binding protein <newline> oo18 RNA binding protein	-	-
Prp19	1	protein_coding_gene	FBgn0261119	Pre-RNA processing factor 19	CG5519	mRNA	18451041	18447361	1	1	3680	Prp19	lethalearly	lethalpupal	Pre-RNA processing factor 19	Prp19 <newline> CG5519 <newline> PRP19 <newline> EC2-11 <newline> l(2)07838 <newline> GPB <newline> BcDNA:LD02793 <newline> prp19 <newline> Gbp <newline> dPrp19	FBgn0261119	CG5519	BCP	B complex, Bact complex, C complex, P complex, PRP19 complex	NA	WD40 repeat ; Zinc-finger RING/FYVE/PHD-type ; Pre-mRNA-processing factor 19 U box domain	generation of catalytic spliceosome for first transesterification step ; GO:0000349 | inferred from biological aspect of ancestor with PANTHER:PTN000356711 <newline> DNA repair ; GO:0006281 | inferred from electronic annotation with InterPro:IPR038959 <newline> chromatin organization ; GO:0006325 | inferred from mutant phenotype <newline> regulation of alternative mRNA splicing, via spliceosome ;…	Prp19 complex ; GO:0000974 | inferred from biological aspect of ancestor with PANTHER:PTN000356711 <newline> spliceosomal complex ; GO:0005681 | traceable author statement <newline> precatalytic spliceosome ; GO:0071011 | inferred from high throughput direct assay <newline> U2-type catalytic step 1 spliceosome ; GO:0071006 | inferred from biological aspect of ancestor with PANTHER:PTN000356711 <n…	ubiquitin-protein transferase activity ; GO:0004842 | inferred from biological aspect of ancestor with PANTHER:PTN000356711 <newline> ubiquitin protein ligase activity ; GO:0061630 | inferred from electronic annotation with InterPro:IPR038959 <newline> ubiquitin-protein transferase activity ; GO:0004842 | inferred from sequence or structural similarity with HGNC:17896	Hsap\PRPF19	Mmus\Prpf19		NM 079059.2 <newline> GTP-binding regulatory protein beta chain <newline> Prp19 <newline> Pre-RNA processing factor 19	FBgn0010644 <newline> FBgn0013969 <newline> FBgn0027900	-
Prp8	1	protein_coding_gene	FBgn0033688	pre-mRNA processing factor 8	CG8877	mRNA	12162998	12154258	1	1	8740	Prp8	weakflier	weakflier	pre-mRNA processing factor 8	prp8 <newline> CG8877 <newline> E-2e <newline> Prp8 <newline> A1Z8U0	FBgn0033688	CG8877	BCP	B complex, Bact complex, C complex, U5 snRNP, tri-snRNP, P complex	RRM	RNA recognition motif ; MPN domain ; PROCN domain ; Prp8 Rnase domain IV, fingers region	mRNA splicing, via spliceosome ; GO:0000398 | inferred from sequence or structural similarity with SGD:S000001208 <newline> spliceosomal tri-snRNP complex assembly ; GO:0000244 | inferred from biological aspect of ancestor with PANTHER:PTN000124558 <newline> mRNA splicing, via spliceosome ; GO:0000398 | inferred by curator from GO:0071011,GO:0071013 <newline> ventral cord development ; GO:0007419…	precatalytic spliceosome ; GO:0071011 | inferred from high throughput direct assay <newline> small nuclear ribonucleoprotein complex ; GO:0030532 | inferred from physical interaction with CG12320 inferred from physical interaction with CG4849 inferred from physical interaction with l(3)72Ab inferred from physical interaction with l(3)72Ab <newline> cytoplasm ; GO:0005737 | inferred from direct as…	U1 snRNA binding ; GO:0030619 | inferred from biological aspect of ancestor with PANTHER:PTN000124558 <newline> pre-mRNA intronic binding ; GO:0097157 | inferred from biological aspect of ancestor with PANTHER:PTN000124558 <newline> U5 snRNA binding ; GO:0030623 | inferred from biological aspect of ancestor with PANTHER:PTN000124558 <newline> U2 snRNA binding ; GO:0030620 | inferred from biologic…	Hsap\PRPF8	Mmus\Prpf8		U5 small nuclear ribonucleoprotein-specific factor <newline> Prp8 <newline> prp8 <newline> pre-mRNA processing factor 8	-	-
Rbfox1	9	protein_coding_gene	FBgn0052062	RNA-binding Fox protein 1	CG32062	mRNA	10594012	10481412	9	9	112600	Rbfox1	lethalearly	flightless	RNA-binding Fox protein 1	CG14155 <newline> BcDNA:GM06073 <newline> cg18441 <newline> CG18441 <newline> CG32062 <newline> dA2BP1 <newline> A2BP1 <newline> Rbfox1 <newline> A2bp1 <newline> rbfox1	FBgn0052062	CG32062	NO	NO	RRM	RNA recognition motif domain	cellular response to chemical stress ; GO:0062197 | inferred from direct assay <newline> regulation of alternative mRNA splicing, via spliceosome ; GO:0000381 | inferred from biological aspect of ancestor with PANTHER:PTN000400711 <newline> nervous system development ; GO:0007399 | inferred from mutant phenotype <newline> germarium-derived oocyte differentiation ; GO:0030706 | inferred from mutan…	cytoplasm ; GO:0005737 | inferred from direct assay <newline> Cajal body ; GO:0015030 | inferred from direct assay <newline> nuclear stress granule ; GO:0097165 | inferred from direct assay <newline> nucleolus ; GO:0005730 | inferred from direct assay <newline> cytoplasmic stress granule ; GO:0010494 | inferred from direct assay <newline> cytoplasm ; GO:0005737 | inferred from biological aspect o…	mRNA binding ; GO:0003729 | inferred from biological aspect of ancestor with PANTHER:PTN000400711 <newline> transcription regulatory region sequence-specific DNA binding ; GO:0000976 | inferred from direct assay <newline> mRNA 3'-UTR binding ; GO:0003730 | inferred from direct assay <newline> transcription factor binding ; GO:0008134 | inferred from physical interaction with ci	Hsap\RBFOX1 <newline> Hsap\RBFOX3 <newline> Hsap\RBFOX2	Mmus\Rbfox1 <newline> Mmus\Rbfox3 <newline> Mmus\Rbfox2		Ataxin-2 Binding Protein 1 <newline> Ataxin-2 binding protein 1 <newline> RNA-binding Fox protein 1 <newline> Ataxin 2-binding protein 1	FBgn0036086 <newline> FBgn0036087	-
Rbp9	9	protein_coding_gene	FBgn0010263	RNA-binding protein 9	CG3151	mRNA	2968434	2954762	9	3	13672	Rbp9	no	no	RNA-binding protein 9	fs(2)B <newline> fes <newline> rbp9 <newline> RBP9 <newline> RRM9 <newline> RRM10 <newline> RBP9-2 <newline> rbp9a <newline> rbp <newline> rrm9 <newline> rrm10 <newline> Rbp10 <newline> CG15402 <newline> CG3151 <newline> Rbp9 <newline> Rpb9	FBgn0010263	CG3151	NO	NO	RRM	RNA recognition motif domain; Splicing factor ELAV/Hu superfamily	establishment of blood-brain barrier ; GO:0060856 | inferred from mutant phenotype <newline> germ cell proliferation ; GO:0036093 | inferred from mutant phenotype <newline> oogenesis ; GO:0048477 | inferred from mutant phenotype	nucleus ; GO:0005634 | traceable author statement	mRNA binding ; GO:0003729 | inferred from sequence or structural similarity <newline> RNA binding ; GO:0003723 | inferred from electronic annotation with InterPro:IPR002343, InterPro:IPR006548 <newline> mRNA binding ; GO:0003729 | non-traceable author statement	Hsap\ELAVL2 <newline> Hsap\ELAVL4 <newline> Hsap\ELAVL3 <newline> Hsap\ELAVL1 <newline> Hsap\CSNK1A1 <newline> Hsap\CSK <newline> Hsap\PRXL2B	Mmus\Elavl2 <newline> Mmus\Elavl3 <newline> Mmus\Raver2 <newline> Mmus\Elavl1 <newline> Mmus\Elavl4 <newline> Mmus\Prxl2b		female sterile(2)Bridges <newline> female sterile <newline> RNA-binding protein 10 <newline> RNA-binding protein 9 <newline> female sterile (2) Bridges <newline> RNA binding protein 9 <newline> Arrest	FBgn0010253 <newline> FBgn0031482	-
Rm62	12	protein_coding_gene	FBgn0003261	Rm62	CG10279	mRNA	6008579	6000426	12	8	8153	Rm62	lethalearly	lethalpupal	Rm62	Rm62 <newline> CG10279 <newline> Dmp68 <newline> p68 <newline> Lip <newline> RM62 <newline> DmRH8 <newline> 4136 <newline> l(3)s5196 <newline> l(3)rG338 <newline> l(3)j3D5 <newline> l(3)j3D2 <newline> l(3)01086 <newline> rm62 <newline> dmP68	FBgn0003261	CG10279	NO	NO	heli	RNA helicase, DEAD-box type, Q motif	regulation of defense response to virus ; GO:0050688 | inferred from mutant phenotype <newline> RNA interference ; GO:0016246 | inferred from biological aspect of ancestor with PANTHER:PTN002774068 <newline> regulation of alternative mRNA splicing, via spliceosome ; GO:0000381 | inferred from high throughput mutant phenotype <newline> RNA interference ; GO:0016246 | inferred from mutant phenotype…	nucleus ; GO:0005634 | inferred by curator from GO:0000381 <newline> polytene chromosome puff ; GO:0005703 | inferred from direct assay <newline> ribonucleoprotein complex ; GO:1990904 | inferred from biological aspect of ancestor with PANTHER:PTN002773962 <newline> nucleus ; GO:0005634 | inferred from high throughput direct assay <newline> precatalytic spliceosome ; GO:0071011 | inferred from hi…	ATP binding ; GO:0005524 | inferred from electronic annotation with InterPro:IPR011545 <newline> RNA binding ; GO:0003723 | inferred from biological aspect of ancestor with PANTHER:PTN002772338 <newline> RNA helicase activity ; GO:0003724 | inferred from biological aspect of ancestor with PANTHER:PTN002772338 <newline> protein binding ; GO:0005515 | inferred from physical interaction with Fmr1 <n…	Hsap\DDX5 <newline> Hsap\DDX55 <newline> Hsap\DDX59 <newline> Hsap\DDX21 <newline> Hsap\DDX50 <newline> Hsap\GPR149 <newline> Hsap\DDX17 <newline> Hsap\TDRD12 <newline> Hsap\DDX43 <newline> Hsap\DDX46 <newline> Hsap\DDX42 <newline> Hsap\DDX53	Mmus\Ddx50 <newline> Mmus\Ddx5 <newline> Mmus\Ddx59 <newline> Mmus\Tdrd12 <newline> Mmus\Ddx21 <newline> Mmus\Ddx17 <newline> Mmus\Gpr149 <newline> Mmus\Ddx55 <newline> Mmus\Ddx46 <newline> Mmus\Ddx43 <newline> Mmus\Ddx3x		Lighten up <newline> Rm62 <newline> Lighten-up <newline> Helicase p62	FBgn0010736 <newline> FBgn0011038 <newline> FBgn0011355 <newline> FBgn0011356 <newline> FBgn0011496 <newline> FBgn0011645	Belongs to the DEAD box helicase family. DDX5/DBP2 subfamily.
rump	2	protein_coding_gene	FBgn0267790	rumpelstiltskin	CG9373	mRNA	9510324	9505853	2	2	4471	rump	weakflier	weakflier	rumpelstiltskin	S5 <newline> Hrp59 <newline> hnRNP M <newline> p75	FBgn0267790	CG9373	NO	NO	RRM	RNA recognition motif domain	intracellular mRNA localization			Hsap\MYEF2	Mmus\Hnrnpm
sbr	3	protein_coding_gene	FBgn0003321	small bristles	CG1664	mRNA	10847092	10832752	3	2	14340	sbr	lethalearly	flightless	small bristles	sbr <newline> NXF1 <newline> l(1)ts403 <newline> dTap <newline> CG1664 <newline> PABPr <newline> DmNXF1 <newline> nxf1 <newline> CT4634 <newline> l(1)ts <newline> sbt <newline> l(1)G1 <newline> l(1)9Fd <newline> CG17335 <newline> NXF1-p15 <newline> DNXF-1 <newline> Dm nxf1 <newline> NFX1 <newline> Nxf1 <newline> Sbr <newline> nfx1 <newline> SBR <newline> dNXF1	FBgn0003321	CG1664	NO	NO	TAPC	Nuclear RNA export factor ; Leucine-rich repeat ; TAP C-terminal (TAP-C) domain	positive regulation of RNA export from nucleus ; GO:0046833 | inferred from mutant phenotype <newline> poly(A)+ mRNA export from nucleus ; GO:0016973 | inferred from mutant phenotype <newline> poly(A)+ mRNA export from nucleus ; GO:0016973 | inferred from biological aspect of ancestor with PANTHER:PTN000070434 <newline> nuclear export ; GO:0051168 | inferred from mutant phenotype <newline> mRNA e…	nuclear envelope ; GO:0005635 | inferred from direct assay <newline> cytoplasm ; GO:0005737 | inferred from electronic annotation with InterPro:IPR015245 <newline> nucleoplasm ; GO:0005654 | inferred from direct assay <newline> nucleus ; GO:0005634 | inferred from biological aspect of ancestor with PANTHER:PTN000070434 <newline> nuclear membrane ; GO:0031965 | inferred from direct assay	protein binding ; GO:0005515 | inferred from physical interaction with UniProtKB:Q9VTL1 <newline> RNA binding ; GO:0003723 | inferred from biological aspect of ancestor with PANTHER:PTN000070434 <newline> protein N-terminus binding ; GO:0047485 | inferred from physical interaction with UniProtKB:Q9VSK8 <newline> protein binding ; GO:0005515 | inferred from physical interaction with UniProtKB:Q9V3…	Hsap\NXF3 <newline> Hsap\NXF5 <newline> Hsap\NXF2 <newline> Hsap\NXF2B <newline> Hsap\NXF1	Mmus\Nxf1 <newline> Mmus\Nxf3 <newline> Mmus\Nxf7 <newline> Mmus\Nxf2 <newline> Mmus\Tmem223		locus 1 <newline> nuclear export factor 1 <newline> shorter-bristles <newline> small bristles <newline> Nxf1	FBgn0030236 <newline> FBgn0030238	Belongs to the NXF family.
SF1	3	protein_coding_gene	FBgn0025571	Splicing factor 1	CG5836	mRNA	17545148	17540421	3	3	4727	SF1	lethalpupal	flightless	Splicing factor 1	dSF1 <newline> CG5836 <newline> cg5836 <newline> p70 <newline> SF1	FBgn0025571	CG5836	A	A complex, recruited at A complex	KH	K Homology domain ; Zinc finger, CCHC-type	mRNA splicing, via spliceosome ; GO:0000398 | inferred from sequence or structural similarity with SGD:S000004106 <newline> mRNA splicing, via spliceosome ; GO:0000398 | inferred by curator from GO:0071011 <newline> regulation of alternative mRNA splicing, via spliceosome ; GO:0000381 | inferred from biological aspect of ancestor with PANTHER:PTN000129548	nucleus ; GO:0005634 | inferred from biological aspect of ancestor with PANTHER:PTN000129548 <newline> nucleus ; GO:0005634 | inferred from direct assay <newline> spliceosomal complex ; GO:0005681 | inferred from sequence or structural similarity with SGD:S000004106 <newline> precatalytic spliceosome ; GO:0071011 | inferred from high throughput direct assay	zinc ion binding ; GO:0008270 | inferred from electronic annotation with InterPro:IPR001878 <newline> pre-mRNA branch point binding ; GO:0045131 | inferred from electronic annotation with InterPro:IPR031150 <newline> RNA binding ; GO:0003723 | inferred from sequence or structural similarity with HGNC:12950 <newline> mRNA binding ; GO:0003729 | inferred from biological aspect of ancestor with PANT…	Hsap\SF1 <newline> Hsap\KHDRBS2 <newline> Hsap\KHDRBS1 <newline> Hsap\KHDRBS3 <newline> Hsap\QKI	Mmus\Sf1 <newline> Mmus\Khdrbs3 <newline> Mmus\Khdrbs2 <newline> Mmus\Khdrbs1 <newline> Mmus\Qk		splicing factor 1 <newline> Splicing factor 1	FBgn0038518	-
Sf3a2	1	protein_coding_gene	FBgn0036314	Splicing factor 3a subunit 2	CG10754	mRNA	12814019	12813028	1	1	991	Sf3a2	lethalpupal	flightless	Splicing factor 3a subunit 2	CG10754 <newline> Sf3a2 <newline> SF3A2 <newline> CG2807	FBgn0036314	CG10754	ABCP	17S U2 snRNP, A complex, B complex, Bact complex, C complex, P complex	ZnF	Zinc finger C2H2-type ; SF3A2 domain	positive regulation of gene expression ; GO:0010628 | inferred from mutant phenotype <newline> mRNA splicing, via spliceosome ; GO:0000398 | inferred by curator from GO:0071011,GO:0071013 <newline> spliceosomal complex assembly ; GO:0000245 | inferred from biological aspect of ancestor with PANTHER:PTN000574843	U2-type prespliceosome ; GO:0071004 | inferred from biological aspect of ancestor with PANTHER:PTN000574843 <newline> precatalytic spliceosome ; GO:0071011 | inferred from high throughput direct assay <newline> U2 snRNP ; GO:0005686 | inferred from biological aspect of ancestor with PANTHER:PTN000574843 <newline> catalytic step 2 spliceosome ; GO:0071013 | inferred from biological aspect of ances…	zinc ion binding ; GO:0008270 | inferred from electronic annotation with InterPro:IPR000690, InterPro:IPR003604 <newline> RNA binding ; GO:0003723 | inferred from sequence or structural similarity with HGNC:10766	Hsap\SF3A2	Mmus\Sf3a2		Splicing factor 3a subunit 2	-	-
Sf3b1	2	protein_coding_gene	FBgn0031266	Splicing factor 3b subunit 1	CG2807	mRNA	572907	568340	2	1	4567	Sf3b1	no	no	Splicing factor 3b subunit 1	anon-21Cd <newline> CG2807 <newline> SF3B <newline> Sf3b1 <newline> SF3B1	FBgn0031266	CG2807	ABCP	17S U2 snRNP, A complex, B complex, Bact complex, C complex, P complex	TOG	Armadillo-like helical ; TOG domain	mRNA splicing, via spliceosome ; GO:0000398 | inferred by curator from GO:0071011,GO:0071013 <newline> spliceosomal complex assembly ; GO:0000245 | inferred from biological aspect of ancestor with PANTHER:PTN000250426 <newline> mRNA splicing, via spliceosome ; GO:0000398 | inferred from sequence or structural similarity with SGD:S000004901	U2 snRNP ; GO:0005686 | inferred from sequence or structural similarity with SGD:S000004901 <newline> U2 snRNP ; GO:0005686 | inferred from biological aspect of ancestor with PANTHER:PTN000250426 <newline> U2-type prespliceosome ; GO:0071004 | inferred from biological aspect of ancestor with PANTHER:PTN000250426 <newline> catalytic step 2 spliceosome ; GO:0071013 | inferred from biological aspect…	mRNA binding ; GO:0003729 | inferred from biological aspect of ancestor with PANTHER:PTN000250426 <newline> RNA binding ; GO:0003723 | inferred from sequence or structural similarity with HGNC:10768	Hsap\SF3B1	Mmus\Sf3b1		Splicing factor 3b subunit 1	FBgn0025944	-
Sf3b2	2	protein_coding_gene	FBgn0031493	Splicing factor 3b subunit 2	CG3605	mRNA	3029168	3026252	2	1	2916	Sf3b2	lethalearly	lethalearly	Splicing factor 3b subunit 2	CG3605 <newline> SF3B2 <newline> Sf3b2	FBgn0031493	CG3605	ABCP	17S U2 snRNP, A complex, B complex, Bact complex, C complex, P complex	NA	DUF382 ; PSP, proline-rich	mRNA splicing, via spliceosome ; GO:0000398 | inferred from sequence or structural similarity with SGD:S000004853 <newline> mRNA splicing, via spliceosome ; GO:0000398 | inferred from biological aspect of ancestor with PANTHER:PTN001765154 <newline> mRNA splicing, via spliceosome ; GO:0000398 | inferred by curator from GO:0071011,GO:0071013	precatalytic spliceosome ; GO:0071011 | inferred from high throughput direct assay <newline> U2 snRNP ; GO:0005686 | inferred from biological aspect of ancestor with PANTHER:PTN001765154 <newline> catalytic step 2 spliceosome ; GO:0071013 | inferred from high throughput direct assay <newline> catalytic step 2 spliceosome ; GO:0071013 | inferred from biological aspect of ancestor with PANTHER:PTN0…	RNA binding ; GO:0003723 | inferred from sequence or structural similarity with HGNC:10769	Hsap\SF3B2	Mmus\Sf3b2		Splicing factor 3b subunit 2	-	-
Sf3b3	2	protein_coding_gene	FBgn0035162	Splicing factor 3b subunit 3	CG13900	mRNA	833385	826720	2	2	6665	Sf3b3	weakflier	weakflier	Splicing factor 3b subunit 3	CG13900 <newline> SF3B3 <newline> Sf3b3	FBgn0035162	CG13900	ABCP	17S U2 snRNP, A complex, B complex, Bact complex, C complex, P complex	NA	WD40 repeat	mRNA splicing, via spliceosome ; GO:0000398 | inferred from sequence or structural similarity with SGD:S000004513 inferred from sequence or structural similarity with protein_id:CAB56791 <newline> mRNA splicing, via spliceosome ; GO:0000398 | inferred by curator from GO:0071011,GO:0071013 <newline> mRNA splicing, via spliceosome ; GO:0000398 | inferred from biological aspect of ancestor with PANT…	small nuclear ribonucleoprotein complex ; GO:0030532 | inferred from sequence or structural similarity with SGD:S000004513 inferred from sequence or structural similarity with protein_id:CAB56791 <newline> U2 snRNP ; GO:0005686 | inferred from direct assay <newline> catalytic step 2 spliceosome ; GO:0071013 | inferred from high throughput direct assay <newline> SAGA complex ; GO:0000124 | inferre…	nucleic acid binding ; GO:0003676 | inferred from electronic annotation with InterPro:IPR004871	Hsap\SF3B3	Mmus\Sf3b3		splicing factor 3b subunit 3 <newline> putative damaged DNA-binding activity <newline> Splicing Factor 3b subunit 3 <newline> Splicing factor 3b subunit 3	-	Belongs to the RSE1 family.
Smn	2	protein_coding_gene	FBgn0036641	survival motor neuron	CG16725	mRNA	16581547	16580398	2	1	1149	Smn	lethallatepupal	lethallatepupal	survival motor neuron	l(3)73Ao <newline> smn <newline> dSMN <newline> DmSMN <newline> CG16725 <newline> Smn <newline> SMN <newline> dSmn	FBgn0036641	CG16725	NO	NO	Tudor	Tudor domain	neuromuscular junction development ; GO:0007528 | inferred from mutant phenotype <newline> positive regulation of synaptic growth at neuromuscular junction ; GO:0045887 | inferred from genetic interaction with htl, btl <newline> lumen formation, open tracheal system ; GO:0035149 | inferred from mutant phenotype <newline> neuromuscular synaptic transmission ; GO:0007274 | inferred from mutant phen…	cytoplasm ; GO:0005737 | inferred from direct assay <newline> Gemini of coiled bodies ; GO:0097504 | inferred from direct assay <newline> neuromuscular junction ; GO:0031594 | inferred from direct assay <newline> SmD-containing SMN-Sm protein complex ; GO:0034730 | inferred from direct assay <newline> Z disc ; GO:0030018 | inferred from direct assay <newline> SMN-Gemin2 complex ; GO:0034718 | inf…	alpha-actinin binding ; GO:0051393 | inferred from physical interaction with Actn <newline> RNA binding ; GO:0003723 | inferred from electronic annotation with InterPro:IPR010304	Hsap\SMN2 <newline> Hsap\SMN1 <newline> Hsap\SMNDC1	Mmus\Smn1 <newline> Mmus\Smndc1		survival motor neuron <newline> Survival Motor Neuron <newline> survival of motor neurons <newline> Survival of Motor Neurons <newline> Smn <newline> Survival motor neuron	FBgn0025499	Belongs to the SMN family.
snf	1	protein_coding_gene	FBgn0003449	sans fille	CG4528	mRNA	5310501	5309242	1	1	1259	snf	lethalpupal	lethalpupal	sans fille	U2 snRNP <newline> fs(1)1621 <newline> SNF <newline> Snf <newline> CG4528 <newline> SNF/D25 <newline> U2 snRNP B'' protein <newline> liz <newline> fs(1)A1621 <newline> snf1621 <newline> fs(1)A16121 <newline> snRNP B'' <newline> D25 <newline> snf <newline> U1-A <newline> snRNP-U1-A <newline> U2B <newline> dSNF <newline> U1A	FBgn0003449	CG4528	AB	A complex, B complex, U1 snRNP	RRM	RNA recognition motif domain	oogenesis ; GO:0048477 | inferred from mutant phenotype <newline> regulation of alternative mRNA splicing, via spliceosome ; GO:0000381 | inferred from direct assay <newline> mRNA splicing, via spliceosome ; GO:0000398 | inferred from sequence or structural similarity with SGD:S000000323 inferred from sequence or structural similarity with SGD:S000001448 <newline> mRNA splicing, via spliceosome ;…	nucleus ; GO:0005634 | inferred from direct assay <newline> protein-containing complex ; GO:0032991 | inferred from physical interaction with Sxl <newline> U2 snRNP ; GO:0005686 | inferred from sequence or structural similarity with SGD:S000001448 <newline> nucleus ; GO:0005634 | inferred by curator from GO:0000381 <newline> ribonucleoprotein complex ; GO:1990904 | inferred from direct assay <new…	protein binding ; GO:0005515 | inferred from physical interaction with Sxl <newline> snRNA stem-loop binding ; GO:0035614 | inferred from direct assay <newline> U1 snRNA binding ; GO:0030619 | inferred from direct assay <newline> identical protein binding ; GO:0042802 | inferred from physical interaction with snf <newline> pre-mRNA intronic pyrimidine-rich binding ; GO:0097158 | inferred from dir…	Hsap\SNRPB2 <newline> Hsap\SNRPA <newline> Hsap\RNPC3	Mmus\Snrpb2 <newline> Mmus\Snrpa <newline> Mmus\Rnpc3 <newline> Mmus\Gm5145		splicing necessary factor <newline> simply not fertile <newline> sans fille <newline> Sans-fille <newline> Sans fille	FBgn0005667	Belongs to the RRM U1 A/B'' family.
Spf45	3	protein_coding_gene	FBgn0086683	Spf45	CG17540	mRNA	23068386	23066874	3	3	1512	Spf45	weakflier	weakflier	Spf45	CG17540 <newline> RBM17 <newline> SPF45 <newline> spf-45 <newline> dSPF45 <newline> spf45 <newline> Spf45 <newline> dRBM17	FBgn0086683	CG17540	A	A complex, 17S U2 snRNP associated	RRM	RNA recognition motif domain ; G-patch domain	mRNA splicing, via spliceosome ; GO:0000398 | inferred by curator from GO:0071011 <newline> alternative mRNA splicing, via spliceosome ; GO:0000380 | inferred from biological aspect of ancestor with PANTHER:PTN000328844 <newline> DNA repair ; GO:0006281 | inferred from mutant phenotype <newline> compound eye morphogenesis ; GO:0001745 | inferred from genetic interaction with HGNC:10548 <newline> …	precatalytic spliceosome ; GO:0071011 | inferred from high throughput direct assay	nucleic acid binding ; GO:0003676 | inferred from electronic annotation with InterPro:IPR000467, InterPro:IPR000504 <newline> molecular_function ; GO:0003674 | no biological data available	Hsap\RBM17 <newline> Hsap\SCN10A <newline> Hsap\PTGS2	Mmus\Rbm17 <newline> Mmus\Ptgs2		CG17540 <newline> Spf45 <newline> RNA binding motif protein 1	FBgn0040024 <newline> FBgn0062542	-
Spx	1	protein_coding_gene	FBgn0015818	Spliceosomal protein on the X	CG3780	mRNA	6257596	6255822	1	1	1774	Spx	lethalearly	lethalearly	Spliceosomal protein on the X	CG3780 <newline> SPX <newline> Spx <newline> spx <newline> SF3B4	FBgn0015818	CG3780	ABCP	17S U2 snRNP, A complex, B complex, Bact complex, C complex, P complex	RRM	RNA recognition motif domain	mRNA splicing, via spliceosome ; GO:0000398 | inferred from biological aspect of ancestor with PANTHER:PTN002769360 <newline> mRNA splicing, via spliceosome ; GO:0000398 | inferred by curator from GO:0071011 <newline> mRNA splicing, via spliceosome ; GO:0000398 | inferred from sequence or structural similarity with SGD:S000005846 <newline> mRNA splicing, via spliceosome ; GO:0000398 | inferred fr…	precatalytic spliceosome ; GO:0071011 | inferred from high throughput direct assay <newline> U2 snRNP ; GO:0005686 | inferred from sequence or structural similarity with SGD:S000005846 <newline> nucleus ; GO:0005634 | inferred from biological aspect of ancestor with PANTHER:PTN002769360 <newline> U2 snRNP ; GO:0005686 | inferred from biological aspect of ancestor with PANTHER:PTN002769360 <newlin…	RNA binding ; GO:0003723 | inferred from biological aspect of ancestor with PANTHER:PTN002768817 <newline> mRNA binding ; GO:0003729 | inferred from sequence or structural similarity	Hsap\SF3B4 <newline> Hsap\NCL <newline> Hsap\RBM7 <newline> Hsap\RBM11	Mmus\Sf3b4 <newline> Mmus\Rbm7 <newline> Mmus\Rbm11		Spliceosomal protein on the X	-	-
Ythdc1	2	protein_coding_gene	FBgn0027616	YTH domain containing 1	CG12076	mRNA	3374170	3370451	2	2	3719	Ythdc1	weakflier	weakflier	YTH domain containing 1	dYT521-B <newline> CG12076 <newline> BcDNA:GH01918 <newline> YT521 <newline> Ythdc1 <newline> YT521-B	FBgn0027616	CG12076	NO	NO	YTH	YTH domain	mRNA splicing, via spliceosome ; GO:0000398 | inferred from biological aspect of ancestor with PANTHER:PTN000270521 <newline> regulation of alternative mRNA splicing, via spliceosome ; GO:0000381 | inferred from mutant phenotype <newline> regulation of alternative mRNA splicing, via spliceosome ; GO:0000381 | inferred from direct assay <newline> regulation of mRNA splicing, via spliceosome ; GO:0…	nucleoplasm ; GO:0005654 | inferred from biological aspect of ancestor with PANTHER:PTN000270521 <newline> nucleus ; GO:0005634 | inferred from direct assay	N6-methyladenosine-containing RNA binding ; GO:1990247 | inferred from direct assay <newline> N6-methyladenosine-containing RNA binding ; GO:1990247 | inferred from biological aspect of ancestor with PANTHER:PTN000270521 <newline> mRNA binding ; GO:0003729 | inferred from direct assay <newline> mRNA binding ; GO:0003729 | inferred from biological aspect of ancestor with PANTHER:PTN000270389 <newl…	Hsap\YTHDC1 <newline> Hsap\YTHDC2 <newline> Hsap\YTHDF2 <newline> Hsap\YTHDF3 <newline> Hsap\YTHDF1	Mmus\Ythdc1 <newline> Mmus\Ythdc2 <newline> Mmus\Ppp1r10 <newline> Mmus\Ythdf1 <newline> Mmus\Ythdf3 <newline> Mmus\Ythdf2		YT521-B <newline> YTH domain containing 1	-	-

## Sheet: screen_data
Gal4driver	Gene_tested	SYMBOL	Spliceosome_membership	Hairpin_ID	Stock_Number	flight_index	1.phenotype	lethal_timepoint	Imaged	myofiber_pheno	myofibril_pheno	sarcomere_pheno
Act88F-Gal4	Atx2	Atx2	notassociated	KK100423	V108843	-0.942857	flightless	NA	yes	missing, stretched	degenerate	disorganizedZ
Act88F-Gal4	Atx2	Atx2	notassociated	TRiP.HMS01392	BL36114	-0.628571	flightless	NA	no
Act88F-Gal4	Atx2	Atx2	notassociated	TRiP.HMS02726	BL44012	NA	lethal	latepupal	no
Act88F-Gal4	Bru1,_Aret	bru1	notassociated	GD8699	V41568	-1	flightless	NA	yes	missing, stretched	thick, degenerate	short
Act88F-Gal4	Cdc5	Cdc5	complexB,C,P	TRiP.HMC02918	BL44524	NA	lethal	latepupal	no
Act88F-Gal4	Cdc5	Cdc5	complexB,C,P	TRiP.HMC03948	BL55261	0.6125	wildtype	NA	no
Act88F-Gal4	Sart1_(CG6686)	CG6686	complexB	TRiP.HMC03913	BL55202	NA	lethal	undetermined	no
Act88F-Gal4	U2SURP_(CG9346)	CG9346	complexB	GD14191	V27013	-0.319035	weakflier	NA	no
Act88F-Gal4	U2SURP_(CG9346)	CG9346	complexB	TRiP.HMC04119	BL56898	0.71831	wildtype	NA	no
Act88F-Gal4	doa	Doa	notassociated	TRiP.HMJ03121	BL50903	NA	lethal	latepupal	no
Act88F-Gal4	doa	Doa	notassociated	GD8588	V19066	-1	lethal	latepupal	no
Act88F-Gal4	doa	Doa	notassociated	KK111879	V102520	-0.297297	weakflier	NA	no
Act88F-Gal4	doa	Doa	notassociated	GD16021	V46449	0.343284	weakflier	NA	no
Act88F-Gal4	fand	fand	complexB,C,P	KK101751	V104186	NA	lethal	latepupal	yes		thin
Act88F-Gal4	fand	fand	complexB,C,P	GD11858	V46312	NA	lethal	latepupal	no
Act88F-Gal4	How	how	notassociated	KK100775	V37342	-0.47541	weakflier	NA	yes		thick	short
Act88F-Gal4	How	how	notassociated	KK100775	V35810	-0.466667	weakflier	NA	yes		thick	short
Act88F-Gal4	How	how	notassociated	TRiPHMC03820	BL55665	0.272727	weakflier	NA	no
Act88F-Gal4	How	how	notassociated	GD13756	V1462	0.733333	wildtype	NA	no
Act88F-Gal4	Hrb87F,_hnRNP_A	Hrb87F	complexA	KK108162	V100732	-1	lethal	latepupal	yes		thin
Act88F-Gal4	mbl	mbl	notassociated	TRiP.JF03264	BL29585	0.767442	wildtype	NA	no
Act88F-Gal4	mbl	mbl	notassociated	KK107778	V105486	0.793103	wildtype	NA	no
Act88F-Gal4	mbl	mbl	notassociated	GD13374	V28732	0.589744	wildtype	NA	no
Act88F-Gal4	me31B	me31B	notassociated	TRiP.GL00695	BL38923	-1	lethal	latepupal	no
Act88F-Gal4	me31B	me31B	notassociated	TRiP.HM05052	BL28566	NA	lethal	latepupal	no
Act88F-Gal4	me31B	me31B	notassociated	TRiP.HMS00539	BL33675	NA	lethal	latepupal	no
Act88F-Gal4	mub	mub	notassociated	TRiP.HMS00189	BL34874	-0.74359	flightless	NA	no
Act88F-Gal4	noi,_Sf3a3	noi	complexA,B,C,P	TRiP.HMS00163	BL34845	-0.724868	flightless	NA	no
Act88F-Gal4	noi,_Sf3a3	noi	complexA,B,C,P	GD9855	V20943	0.5	weakflier	NA	no
Act88F-Gal4	noi,_Sf3a3	noi	complexA,B,C,P	GD9855	V20945	0.5	weakflier	NA	no
Act88F-Gal4	noi,_Sf3a3	noi	complexA,B,C,P	KK101842	V105354	0.894737	wildtype	NA	no
Act88F-Gal4	orb	orb	notassociated	TRiP.JF01864	BL25843	0.956522	wildtype	NA	no
Act88F-Gal4	orb	orb	notassociated	TRiP.GL01484	BL43143	0.745763	wildtype	NA	no
Act88F-Gal4	Prp19	Prp19	complexB,C,P	TRiP.HMS00652	BL32865	NA	lethal	latepupal	yes		thin
Act88F-Gal4	Prp19	Prp19	complexB,C,P	KK101335	V108575	NA	lethal	latepupal	yes		thin
Act88F-Gal4	Prp19	Prp19	complexB,C,P	GD11681	V22147	NA	lethal	latepupal	yes		thin
Act88F-Gal4	Prp19	Prp19	complexB,C,P	GD11681	V41438	NA	lethal	latepupal	yes
Act88F-Gal4	Rbfox1,_A2BP1	Rbfox1	notassociated	KK109100	V110518	-0.937778	flightless	NA	yes		frayed
Act88F-Gal4	Rbfox1,_A2BP1	Rbfox1	notassociated	TRiP.JF02600	BL27286	-0.0518519	weakflier	NA	no
Act88F-Gal4	Rbfox1,_A2BP1	Rbfox1	notassociated	TRiP.HMS00478	BL32476	0.725	wildtype	NA	no
Act88F-Gal4	Rbp9	Rbp9	notassociated	TRiP.JF03084	BL28669	0.818182	wildtype	NA	no
Act88F-Gal4	Rbp9	Rbp9	notassociated	TRiP.GL01167	BL42796	0.714286	wildtype	NA	no
Act88F-Gal4	Rbp9	Rbp9	notassociated	KK109093	V101412	0.72093	wildtype	NA	no
Act88F-Gal4	Rm62	Rm62	notassociated	TRiP.HMS00144	BL34829	-1	flightless	NA	no
Act88F-Gal4	Rm62	Rm62	notassociated	KK112269	V110102	NA	lethal	undetermined	no
Act88F-Gal4	Rm62	Rm62	notassociated	GD17219	V46908	NA	lethal	pharate	no
Act88F-Gal4	Rm62	Rm62	notassociated	TRiP.JF01385	BL31395	-0.210884	weakflier	NA	no
Act88F-Gal4	sbr	sbr	notassociated	KK100882	V103715	-0.185185	weakflier	NA	yes
Act88F-Gal4	sbr	sbr	notassociated	GD14541	V46117	-0.220779	weakflier	NA	yes	missing, stretched	frayed, thick, degenerate	short
Act88F-Gal4	sbr	sbr	notassociated	GD9182	V32691	-0.358491	weakflier	NA	yes		frayed	short
Act88F-Gal4	sbr	sbr	notassociated	GD9182	V32690	-1	flightless	NA	no
Act88F-Gal4	SF1	SF1	complexA	TRiP.HMC03680	BL52938	NA	lethal	latepupal	yes		thin
Act88F-Gal4	Sf3a2	Sf3a2	complexA,B,C,P	TRiP.HMC03799	BL55650	NA	lethal	latepupal	no
Act88F-Gal4	Sf3a2	Sf3a2	complexA,B,C,P	GD7087	V31346_	NA	lethal	latepupal	no
Act88F-Gal4	Sf3a2	Sf3a2	complexA,B,C,P	GD7087	V31347	0.241379	weakflier	NA	no
Act88F-Gal4	Sf3b1	Sf3b1	complexA,B,C,P	TRiP.HMS00055	BL33650	NA	lethal	latepupal	no
Act88F-Gal4	Sf3b2	Sf3b2	complexA,B,C,P	KK101239	V105639	-1	lethal	latepupal	no
Act88F-Gal4	Sf3b2	Sf3b2	complexA,B,C,P	GD11027	V26250	-1	lethal	latepupal	no
Act88F-Gal4	Sf3b2	Sf3b2	complexA,B,C,P	TRiP.HMS00056	BL33651	0.437751	weakflier	NA	no
Act88F-Gal4	Sf3b3	Sf3b3	complexA,B,C,P	TRiP.HMS00614	BL33731	0.480519	weakflier	NA	no
Act88F-Gal4	Smn	Smn	notassociated	TRiP.HMC03832	BL55158	-1	flightless	NA	no
Act88F-Gal4	snf,_SNRPA	snf	complexA,B	TRiP.HMC03197	BL51459	NA	lethal	latepupal	yes
Act88F-Gal4	snf,_SNRPA	snf	complexA,B	TRiP.HMC04200	BL55914	NA	lethal	latepupal	yes
Act88F-Gal4	snf,_SNRPA	snf	complexA,B	KK107649	V104334	NA	lethal	lethal	yes		thin
Act88F-Gal4	Spx,_Sf3b4	Spx	complexA,B,C,P	TRiP.HMJ23875	BL62421	NA	lethal	undetermined	no
Mef2-Gal4	Atx2	Atx2	notassociated	KK100423	V108843	NA	lethal	latepupal	yes		actinblobs
Mef2-Gal4	Atx2	Atx2	notassociated	TRiP.HMS02726	BL44012	NA	lethal	latepupal	yes
Mef2-Gal4	Atx2	Atx2	notassociated	TRiP.HMS01392	BL36114	0.816327	wildtype	NA	no
Mef2-Gal4	Bru1	bru1	notassociated	GD8699	V41568	-1	flightless	NA	yes	stretched, missing	split, thick, degenerate	shortsarcomeres
Mef2-Gal4	Bru1	bru1	notassociated	TRiP.HMC02374	BL44483	-1	flightless	NA	yes	stretched	thick	shortsarcomeres
Mef2-Gal4	Bru1	bru1	notassociated	KK110026	V107459	-1	flightless	NA	yes	stretched, missing	thick, degenerate	shortsarcomeres
Mef2-Gal4	Bru1	bru1	notassociated	GD17093	V48237	1	wildtype	NA	no
Mef2-Gal4	Cdc5	Cdc5	complexB,C,P	TRiP.HMC03948	BL55261	0.633028	wildtype	NA	no
Mef2-Gal4	Cdc5	Cdc5	complexB,C,P	TRiP.HMC02918	BL44524	NA	lethal	undetermined	no
Mef2-Gal4	Sart1	CG6686	complexB	TRiP.HMC03913	BL55202	NA	lethal	early	no
Mef2-Gal4	Prp6	CG6841	complexB	GD10654	V34254	0.642857	wildtype	NA	yes		actinblobs
Mef2-Gal4	Prp6	CG6841	complexB	TRiP.HMC03484	BL51909	0.969231	wildtype	NA	no
Mef2-Gal4	U2SURP	CG9346	complexB	GD14191	V27013	-0.768116	flightless	NA	yes	missing	frayed, actinblobs, degenerate
Mef2-Gal4	U2SURP	CG9346	complexB	TRiP.HMC04119	BL56898	0.725806	wildtype	NA	no
Mef2-Gal4	clu	clu	notassociated	GD13926	V42136	-1	lethal	pharate	yes	stretched	actinblobs
Mef2-Gal4	clu	clu	notassociated	GD13926	V42138	-1	lethal	pharate	yes		actinblobs
Mef2-Gal4	doa	Doa	notassociated	GD16021	V46449	-0.59322	weakflier	NA	yes		actinblobs	shortsarcomeres
Mef2-Gal4	doa	Doa	notassociated	KK111879	V102520	NA	lethal	latepupal	yes
Mef2-Gal4	doa	Doa	notassociated	TRiP.HMJ03121	BL50903	NA	lethal	pupal	yes		actinblobs	shortsarcomeres
Mef2-Gal4	doa	Doa	notassociated	GD10146	V21294	0.794872	wildtype	NA	no
Mef2-Gal4	doa	Doa	notassociated	GD8588	V20120	0.413043	weakflier	NA	no
Mef2-Gal4	doa	Doa	notassociated	GD8588	V19066	-1	lethal	pupal	no
Mef2-Gal4	fand	fand	complexB,C,P	KK101751	V104186	NA	lethal	undetermined	no
Mef2-Gal4	fand	fand	complexB,C,P	GD11858	V46312	NA	lethal	undetermined	no
Mef2-Gal4	How	how	notassociated	GD13756	V1462	0.435897	weakflier	NA	no
Mef2-Gal4	How	how	notassociated	KK100775	V35810	NA	lethal	undetermined	no
Mef2-Gal4	How	how	notassociated	TRiPHMC03820	BL55665	NA	lethal	pupal	no
Mef2-Gal4	How	how	notassociated	KK100775	V37342	NA	lethal	early	no
Mef2-Gal4	Hrb87F	Hrb87F	complexA	TRiP.HMC03679	BL52937	0.515152	wildtype	NA	yes	stretched	actinblobs
Mef2-Gal4	Hrb87F	Hrb87F	complexA	TRiP.JF01757	BL31244	-1	flightless	NA	yes		split, frayed, actinblobs, degenerate
Mef2-Gal4	Hrb87F	Hrb87F	complexA	TRiP.JF01250	BL31472	0.769231	wildtype	NA	no
Mef2-Gal4	Hrb87F	Hrb87F	complexA	KK108162	V100732	NA	lethal	undetermined	no
Mef2-Gal4	mbl	mbl	notassociated	GD13374	V28732	1	wildtype	NA	yes		degenerate	shortsarcomeres
Mef2-Gal4	mbl	mbl	notassociated	TRiP.JF03264	BL29585	NA	lethal	latepupal	yes	stretched, missing
Mef2-Gal4	mbl	mbl	notassociated	KK107778	V105486	NA	lethal	pupal	yes	stretched		shortsarcomeres
Mef2-Gal4	me31B	me31B	notassociated	GD11470	V49378	0.606557	wildtype	NA	no
Mef2-Gal4	me31B	me31B	notassociated	TRiP.HM05052	BL28566	NA	lethal	pupal	no
Mef2-Gal4	me31B	me31B	notassociated	TRiP.HMS00539	BL33675	NA	lethal	pupal	no
Mef2-Gal4	me31B	me31B	notassociated	TRiP.GL00695	BL38923	NA	lethal	pupal	no
Mef2-Gal4	Mettl14	Mettl14	notassociated	TRiP.HMC05566	BL64547	0.730337	wildtype	NA	no
Mef2-Gal4	Mettl14	Mettl14	notassociated	GD16300	V48560	-0.326923	weakflier	NA	no
Mef2-Gal4	Mettl14	Mettl14	notassociated	KK102058	V105434	NA	lethal	undetermined	no
Mef2-Gal4	Mettl3	Mettl3	notassociated	5933R	NIG5933R-4	-0.848739	flightless	NA	yes
Mef2-Gal4	Mettl3	Mettl3	notassociated	TRiP.GL01126	BL41590	0.670455	wildtype	NA	no
Mef2-Gal4	Mettl3	Mettl3	notassociated	TRiP.HMS06011	BL80431	0.593985	wildtype	NA	no
Mef2-Gal4	Mettl3	Mettl3	notassociated	TRiP.HMS06028	BL80448	0.740586	wildtype	NA	no
Mef2-Gal4	Mettl3	Mettl3	notassociated	TRiP.HMS06030	BL80450	0.634921	wildtype	NA	no
Mef2-Gal4	Mettl3	Mettl3	notassociated	GD9882	V20968	0.647668	wildtype	NA	no
Mef2-Gal4	mub	mub	notassociated	TRiP.HMS00189	BL34872	-1	flightless	NA	yes	stretched	split, frayed, actinblobs, degenerate	disorganizedZ,shortsarcomeres
Mef2-Gal4	mub	mub	notassociated	TRiP.HMS00189	BL34873	-1	flightless	NA	yes	stretched	split, frayed, actinblobs, degenerate
Mef2-Gal4	mub	mub	notassociated	TRiP.HMS00189	BL34875	NA	lethal	undetermined	no
Mef2-Gal4	noi	noi	complexA,B,C,P	TRiP.HMS00163	BL34845	NA	lethal	early	yes		actinblobs	shortsarcomeres
Mef2-Gal4	noi	noi	complexA,B,C,P	GD9855	V20945	0.333333	weakflier	NA	no
Mef2-Gal4	noi	noi	complexA,B,C,P	GD9855	V20943	NA	lethal	pupal	no
Mef2-Gal4	noi	noi	complexA,B,C,P	KK101842	V105354	1	lethal	pupal	no
Mef2-Gal4	orb	orb	notassociated	TRiP.JF01864	BL25843	0.896552	wildtype	NA	no
Mef2-Gal4	orb	orb	notassociated	TRiP.GL01484	BL43143	0.855263	wildtype	NA	no
Mef2-Gal4	Prp19	Prp19	complexB,C,P	GD11681	V22146	0.76	wildtype	NA	no
Mef2-Gal4	Prp19	Prp19	complexB,C,P	KK101335	V108575	NA	lethal	pupal	no
Mef2-Gal4	Prp19	Prp19	complexB,C,P	GD11681	V22147	NA	lethal	pupal	no
Mef2-Gal4	Prp19	Prp19	complexB,C,P	GD11681	V41438	NA	lethal	pupal	no
Mef2-Gal4	Prp19	Prp19	complexB,C,P	TRiP.HMS00652	BL32865	NA	lethal	early	no
Mef2-Gal4	Prp8	Prp8	complexB,C,P	TRiP.HMS01297	BL34622	0.52381	wildtype	NA	no
Mef2-Gal4	Prp8	Prp8	complexB,C,P	GD6578	V18565	0.853659	wildtype	NA	no
Mef2-Gal4	Rbfox1	Rbfox1	notassociated	TRiP.JF02600	BL27286	-1	flightless	NA	yes	stretched	actinblobs, thick	shortsarcomeres
Mef2-Gal4	Rbfox1	Rbfox1	notassociated	TRiP.HMS00478	BL32476	0.541667	wildtype	NA	no
Mef2-Gal4	Rbfox1	Rbfox1	notassociated	KK109100	V110518	NA	lethal	early	no
Mef2-Gal4	Rbp9	Rbp9	notassociated	TRiP.JF03084	BL28669	0.755102	wildtype	NA	no
Mef2-Gal4	Rbp9	Rbp9	notassociated	TRiP.GL01167	BL42796	0.843137	wildtype	NA	no
Mef2-Gal4	Rbp9	Rbp9	notassociated	KK109093	V101412	0.813953	wildtype	NA	no
Mef2-Gal4	Rm62	Rm62	notassociated	GD17219	V46908	1	wildtype	NA	yes		actinblobs	shortsarcomeres
Mef2-Gal4	Rm62	Rm62	notassociated	TRiP.JF01385	BL31395	NA	lethal	pupal	yes		split, actinblobs	disorganizedZ,shortsarcomeres
Mef2-Gal4	Rm62	Rm62	notassociated	KK112269	V110102	NA	lethal	early	yes	missing	actinblobs, degenerate
Mef2-Gal4	Rm62	Rm62	notassociated	TRiP.HMS00144	BL34829	NA	lethal	latepupal	no
Mef2-Gal4	rump	rump	notassociated	GD14202	V44659	0.122807	weakflier	NA	no
Mef2-Gal4	sbr	sbr	notassociated	KK100882	V103715	-0.541284	weakflier	NA	yes		split, frayed, actinblobs, degenerate	shortsarcomeres
Mef2-Gal4	sbr	sbr	notassociated	GD14541	V46117	0.869565	wildtype	NA	no
Mef2-Gal4	sbr	sbr	notassociated	GD9182	V32690	NA	lethal	pupal	no
Mef2-Gal4	sbr	sbr	notassociated	GD9182	V32691	NA	lethal	early	no
Mef2-Gal4	SF1	SF1	complexA	TRiP.JF02871	BL28036	0.791667	wildtype	NA	yes
Mef2-Gal4	SF1	SF1	complexA	GD5176	V13425	0.42029	weakflier	NA	yes		actinblobs
Mef2-Gal4	SF1	SF1	complexA	GD5176	V13426	-0.314286	weakflier	NA	yes		split, frayed, actinblobs
Mef2-Gal4	SF1	SF1	complexA	TRiP.HMC03680	BL52938	NA	lethal	pupal	no
Mef2-Gal4	Sf3a2	Sf3a2	complexA,B,C,P	TRiP.HMC03799	BL55650	-1	lethal	pupal	yes	missing	actinblobs, degenerate
Mef2-Gal4	Sf3a2	Sf3a2	complexA,B,C,P	GD7087	V31347	-1	lethal	pharate	no
Mef2-Gal4	Sf3a2	Sf3a2	complexA,B,C,P	GD7087	V31346	-1	lethal	pupal	no
Mef2-Gal4	Sf3b1	Sf3b1	complexA,B,C,P	TRiP.HMS00055	BL33650	0.862069	wildtype	NA	no
Mef2-Gal4	Sf3b2	Sf3b2	complexA,B,C,P	TRiP.HMS00056	BL33651	0.818182	wildtype	NA	no
Mef2-Gal4	Sf3b2	Sf3b2	complexA,B,C,P	KK101239	V105639	NA	lethal	early	no
Mef2-Gal4	Sf3b2	Sf3b2	complexA,B,C,P	GD11027	V26250	NA	lethal	early	no
Mef2-Gal4	Sf3b2	Sf3b2	complexA,B,C,P	GD11027	V26252	NA	lethal	early	no
Mef2-Gal4	Sf3b3	Sf3b3	complexA,B,C,P	TRiP.HMS00614	BL33731	0.428571	weakflier	NA	no
Mef2-Gal4	Smn	Smn	notassociated	TRiP.HMC03832	BL55158	NA	lethal	latepupal	no
Mef2-Gal4	snf	snf	complexA,B	VSH330329	V330329	0.733333	wildtype	NA	yes		actinblobs
Mef2-Gal4	snf	snf	complexA,B	KK107649	V104334	NA	lethal	undetermined	no
Mef2-Gal4	snf	snf	complexA,B	TRiP.HMC03197	BL51459	NA	lethal	pupal	no
Mef2-Gal4	snf	snf	complexA,B	TRiP.HMC04200	BL55914	NA	lethal	pupal	no
Mef2-Gal4	Rbm17	Spf45	complexA	TRiP.HMS02351	BL41954	0.619048	wildtype	NA	yes		actinblobs
Mef2-Gal4	Rbm17	Spf45	complexA	GD9411	V32949	0.55	wildtype	NA	yes		actinblobs
Mef2-Gal4	Rbm17	Spf45	complexA	GD9411	V32948	0.676471	wildtype	NA	no
Mef2-Gal4	Spx	Spx	complexA,B,C,P	TRiP.HMJ23875	BL62421	NA	lethal	early	no
Mef2-Gal4	YT521-B	Ythdc1	notassociated	TRiP.HMS01302	BL34627	0.859813	wildtype	NA	no
Mef2-Gal4	YT521-B	Ythdc1	notassociated	VSH330558	V330558	0.413333	weakflier	NA	no

## Sheet: FigureS5
Behavior or lethality phenotype
Genesymbol	Complex	Mefhairpin1	Mefhairpin2	Mefhairpin3	Mefhairpin4	Mefhairpin5	Acthairpin1	Acthairpin2	Acthairpin3	Acthairpin4	Acthairpin5
Hrb87F	A	flightless	wildtype	weakflier	lethal		nodata	nodata	nodata	latepupal
SF1	A	wildtype	pupal	weakflier	weakflier		nodata	latepupal
CG9346 (U2SURP)	U2ascociated	wildtype	flightless				wildtype	weakflier
Spf45	U2ascociated	wildtype	wildtype	wildtype			nodata	nodata	nodata
snf	U1	pupal	pupal	lethal	wildtype		latepupal	latepupal	lethal	nodata
noi	U2	nodata	pupal	pupal	weakflier		flightless	wildtype	weakflier	weakflier
Sf3a2	U2	pupal	pupal	pharate			latepupal	latepupal	weakflier
Sf3b1	U2	wildtype					latepupal
Sf3b2	U2	wildtype	early	early	early		weakflier	latepupal	latepupal	nodata
Sf3b3	U2	weakflier					weakflier
Spx	U2	early					lethal
CG6686 (SNU66)	tri-snRNP	early					lethal
CG6841(PRPF6)	tri-snRNP	wildtype	wildtype				nodata	nodata
Cdc5	Prp19	lethal	wildtype				latepupal	wildtype
fand	Prp19	lethal	lethal				latepupal	latepupal
Prp19	Prp19	early	pupal	wildtype	pupal	pupal	latepupal	latepupal	nodata	latepupal	latepupal
Prp8	tri-snRNP	wildtype	wildtype				nodata	nodata
confocal phenotype
Genesymbol	Complex	Mefhairpin1	Mefhairpin2	Mefhairpin3	Mefhairpin4	Mefhairpin5	Acthairpin1	Acthairpin2	Acthairpin3	Acthairpin4	Acthairpin5
Hrb87F	A	blobs, frayed, split, degenerate	flier	stretched, blobs	lethal		nodata	nodata	nodata	thin
SF1	A	wildtype	pupal	blobs	blobs,frayed,split		nodata	wildtype
CG9346 (U2SURP)	U2ascociated	flier	missing, degenerate, blobs, frayed				flier	weakflier
Spf45	U2ascociated	blobs	flier	blobs			nodata	nodata	nodata
snf	U1	pupal	pupal	lethal	blobs		wildtype	wildtype	thin	nodata
noi	U2	nodata	pupal	pupal	weakflier		flightless	flier	weakflier	weakflier
Sf3a2	U2	missing,blobs,degenerate	pupal	pharate			latepupal	latepupal	weakflier
Sf3b1	U2	flier					latepupal
Sf3b2	U2	flier	early	early	early		weakflier	latepupal	latepupal	nodata
Sf3b3	U2	weakflier					weakflier
Spx	U2	early					lethal
CG6686 (SNU66)	tri-snRNP	early					lethal
CG6841(PRPF6)	tri-snRNP	flier	actinblobs				nodata	nodata
Cdc5	Prp19	lethal	flier				latepupal	flier
fand	Prp19	lethal	lethal				thin	latepupal
Prp19	Prp19	early	pupal	flier	pupal	pupal	thin	thin	nodata	thin	wildtype
Prp8	tri-snRNP	flier	flier				nodata	nodata

## Sheet: rawdata
Driver	Gene	Gene_tested	SYMBOL	Category	Hairpin_ID	Stock_Number	survival	hairpin_phenotype	hairpin_strength	flight_index	Number_(N)	Zone_1__(flightless)	Zone_2	Zone_3	Zone_4	Zone_5_(fly)
Mef2Gal	Atx2	Atx2	Atx2	RBP,_SM	TRiP.HMS01392	BL36114	y	no	no	0.816327	98	8	1	0	20	69
Mef2Gal	Atx2	Atx2	Atx2	RBP,_SM	TRiP.HMS02726	BL44012	latepupal	lethallatepupal	strong	NA	0	0	0	0	0	0
Mef2Gal	Atx2	Atx2	Atx2	RBP,_SM	KK100423	V108843	latepupal	lethallatepupal	strong	NA	0	0	0	0	0	0
Mef2Gal	Bru1,_Aret	Bru1	bru1	RBP,_RRM	TRiP.HMC02374	BL44483	y	flightless	strong	-1	130	130	0	0	0	0
Mef2Gal	Bru1,_Aret	Bru1	bru1	RBP,_RRM	KK110026	V107459	y	flightless	strong	-1	43	43	0	0	0	0
Mef2Gal	Bru1,_Aret	Bru1	bru1	RBP,_RRM	GD8699	V41568	y	flightless	strong	-1	226	218	8	0	0	0
Mef2Gal	Bru1,_Aret	Bru1	bru1	RBP,_RRM	GD17093	V48237	y	no	no	1	41	0	0	0	25	16
Mef2Gal	Cdc5	Cdc5	Cdc5	Spliceosome	TRiP.HMC02918	BL44524	lethal	lethal	strong	NA	0	0	0	0	0	0
Mef2Gal	Cdc5	Cdc5	Cdc5	Spliceosome	TRiP.HMC03948	BL55261	y	weakflier	weak	0.633028	109	8	4	8	18	71
Mef2Gal	Sart1_(CG6686)	Sart1	CG6686	Spliceosome	TRiP.HMC03913	BL55202	early	lethalearly	strong	NA	0	0	0	0	0	0
Mef2Gal	Prp6_(CG6841)	Prp6	CG6841	spliceosome	TRiP.HMC03484	BL51909	y	no	no	0.969231	65	1	0	0	6	58
Mef2Gal	Prp6_(CG6841)	Prp6	CG6841	spliceosome	GD10654	V34254	y	weakflier	weak	0.642857	56	8	1	1	3	43
Mef2Gal	U2SURP_(CG9346)	U2SURP	CG9346	Spliceosome	TRiP.HMC04119	BL56898	y	weakflier	weak	0.725806	124	6	5	6	13	94
Mef2Gal	U2SURP_(CG9346)	U2SURP	CG9346	Spliceosome	GD14191	V27013	y	flightless	strong	-0.768116	138	102	7	13	6	10
Mef2Gal	clu	clu	clu	RBP,_CLU	GD13926	V42136	pharate	lethalpharate	strong	-1	12	12	0	0	0	0
Mef2Gal	clu	clu	clu	RBP,_CLU	GD13926	V42138	pharate	lethalpharate	strong	-1	7	7	0	0	0	0
Mef2Gal	doa	doa	Doa	enzyme,_splicing_associated_(SR_protein_targets)	TRiP.HMJ03121	BL50903	pupal	lethalpupal	strong	NA	0	0	0	0	0	0
Mef2Gal	doa	doa	Doa	enzyme,_splicing_associated_(SR_protein_targets)	KK111879	V102520	latepupal	lethallatepupal	strong	NA	0	0	0	0	0	0
Mef2Gal	doa	doa	Doa	enzyme,_splicing_associated_(SR_protein_targets)	GD8588	V19066	pupal	lethalpupal	strong	-1	3	3	0	0	0	0
Mef2Gal	doa	doa	Doa	enzyme,_splicing_associated_(SR_protein_targets)	GD8588	V20120	y	weakflier	weak	0.413043	46	5	0	9	28	5
Mef2Gal	doa	doa	Doa	enzyme,_splicing_associated_(SR_protein_targets)	GD10146	V21294	y	no	no	0.794872	78	0	0	8	15	55
Mef2Gal	doa	doa	Doa	enzyme,_splicing_associated_(SR_protein_targets)	GD16021	V46449	y	flightless	strong	-0.59322	118	76	9	9	13	11
Mef2Gal	fand	fand	fand	spliceosome	KK101751	V104186	lethal	lethal	strong	NA	0	0	0	0	0	0
Mef2Gal	fand	fand	fand	spliceosome	GD11858	V46312	lethal	lethal	strong	NA	0	0	0	0	0	0
Mef2Gal	How	How	how	RBP	TRiPHMC03820	BL55665	pupal	lethalpupal	strong	NA	0	0	0	0	0	0
Mef2Gal	How	How	how	RBP	GD13756	V1462	y	weakflier	weak	0.435897	39	0	5	6	11	17
Mef2Gal	How	How	how	RBP	KK100775	V35810	lethal	lethal	strong	NA	0	0	0	0	0	0
Mef2Gal	How	How	how	RBP	KK100775	V37342	early	lethalearly	strong	NA	0	0	0	0	0	0
Mef2Gal	Hrb87F,_hnRNP_A	Hrb87F	Hrb87F	RBP,_RRM,_hnRNP-A,_spliceosome	TRiP.JF01757	BL31244	y	flightless	strong	-1	39	38	1	0	0	0
Mef2Gal	Hrb87F,_hnRNP_A	Hrb87F	Hrb87F	RBP,_RRM,_hnRNP-A,_spliceosome	TRiP.JF01250	BL31472	y	no	no	0.769231	52	3	1	2	13	33
Mef2Gal	Hrb87F,_hnRNP_A	Hrb87F	Hrb87F	RBP,_RRM,_hnRNP-A,_spliceosome	TRiP.HMC03679	BL52937	y	weakflier	weak	0.515152	62	10	4	0	9	39
Mef2Gal	Hrb87F,_hnRNP_A	Hrb87F	Hrb87F	RBP,_RRM,_hnRNP-A,_spliceosome	KK108162	V100732	lethal	lethal	strong	NA	0	0	0	0	0	0
Mef2Gal	mbl	mbl	mbl	RBP,_ZnF	TRiP.JF03264	BL29585	latepupal	lethallatepupal	strong	NA	0	0	0	0	0	0
Mef2Gal	mbl	mbl	mbl	RBP,_ZnF	GD13374	V28732	y	no	no	1	62	0	0	0	0	62
Mef2Gal	mbl	mbl	mbl	RBP,_ZnF	KK107778	V105486	pupal	lethalpupal	strong	NA	0	0	0	0	0	0
Mef2Gal	me31B	me31B	me31B	RBP	TRiP.HM05052	BL28566	pupal	lethalpupal	strong	NA	0	0	0	0	0	0
Mef2Gal	me31B	me31B	me31B	RBP	TRiP.HMS00539	BL33675	pupal	lethalpupal	strong	NA	0	0	0	0	0	0
Mef2Gal	me31B	me31B	me31B	RBP	TRiP.GL00695	BL38923	pupal	lethalpupal	strong	NA	0	0	0	0	0	0
Mef2Gal	me31B	me31B	me31B	RBP	GD11470	V49378	y	weakflier	weak	0.606557	61	1	5	6	23	26
Mef2Gal	Mettl14	Mettl14	Mettl14	RBP	TRiP.HMC05566	BL64547	y	weakflier	weak	0.730337	178	8	5	11	28	126
Mef2Gal	Mettl14	Mettl14	Mettl14	RBP	KK102058	V105434	lethal	lethal	strong	NA	0	0	0	0	0	0
Mef2Gal	Mettl14	Mettl14	Mettl14	RBP	GD16300	V48560	y	flightless	strong	-0.326923	102	43	11	14	14	20
Mef2Gal	Ime4/Mettl3	Mettl3	Mettl3	RBP	TRiP.GL01126	BL41590	y	weakflier	weak	0.670455	176	16	3	10	21	126
Mef2Gal	Ime4/Mettl3	Mettl3	Mettl3	RBP	TRiP.HMS06011	BL80431	y	weakflier	weak	0.593985	133	11	3	13	29	77
Mef2Gal	Ime4/Mettl3	Mettl3	Mettl3	RBP	TRiP.HMS06028	BL80448	y	weakflier	weak	0.740586	239	13	6	12	37	171
Mef2Gal	Ime4/Mettl3	Mettl3	Mettl3	RBP	TRiP.HMS06030	BL80450	y	weakflier	weak	0.634921	126	5	3	15	38	65
Mef2Gal	Ime4/Mettl3	Mettl3	Mettl3	RBP	5933R	NIG5933R-4	y	flightless	strong	-0.848739	119	96	4	10	6	3
Mef2Gal	Ime4/Mettl3	Mettl3	Mettl3	RBP	GD9882	V20968	y	weakflier	weak	0.647668	193	14	4	16	31	128
Mef2Gal	mub	mub	mub	RBP,_KH	TRiP.HMS00189	BL34872	y	flightless	strong	-1	30	30	0	0	0	0
Mef2Gal	mub	mub	mub	RBP,_KH	TRiP.HMS00189	BL34873	y	flightless	strong	-1	114	114	0	0	0	0
Mef2Gal	mub	mub	mub	RBP,_KH	TRiP.HMS00189	BL34875	lethal	lethal	strong	NA	0	0	0	0	0	0
Mef2Gal	noi,_Sf3a3	noi	noi	spliceosome	TRiP.HMS00163	BL34845	early	lethalearly	strong	NA	0	0	0	0	0	0
Mef2Gal	noi,_Sf3a3	noi	noi	spliceosome	KK101842	V105354	pupal	lethalpupal	strong	1	4	0	0	0	0	4
Mef2Gal	noi,_Sf3a3	noi	noi	spliceosome	GD9855	V20943	pupal	lethalpupal	strong	NA	0	0	0	0	0	0
Mef2Gal	noi,_Sf3a3	noi	noi	spliceosome	GD9855	V20945	early	lethalearly	strong	0.333333	9	2	0	1	0	6
Mef2Gal	orb	orb	orb	RBP,_RRM	TRiP.JF01864	BL25843	y	no	no	0.896552	58	1	0	2	11	44
Mef2Gal	orb	orb	orb	RBP,_RRM	TRiP.GL01484	BL43143	y	no	no	0.855263	96	5	1	5	23	118
Mef2Gal	Prp19	Prp19	Prp19	spliceosome	TRiP.HMS00652	BL32865	early	lethalearly	strong	NA	0	0	0	0	0	0
Mef2Gal	Prp19	Prp19	Prp19	spliceosome	KK101335	V108575	pupal	lethalpupal	strong	NA	0	0	0	0	0	0
Mef2Gal	Prp19	Prp19	Prp19	spliceosome	GD11681	V22146	y	no	no	0.76	50	2	1	3	9	35
Mef2Gal	Prp19	Prp19	Prp19	spliceosome	GD11681	V22147	pupal	lethalpupal	strong	NA	0	0	0	0	0	0
Mef2Gal	Prp19	Prp19	Prp19	spliceosome	GD11681	V41438	pupal	lethalpupal	strong	NA	0	0	0	0	0	0
Mef2Gal	Prp8	Prp8	Prp8	spliceosome	TRiP.HMS01297	BL34622	y	weakflier	weak	0.52381	42	5	1	4	9	23
Mef2Gal	Prp8	Prp8	Prp8	spliceosome	GD6578	V18565	y	no	no	0.853659	41	2	0	1	9	29
Mef2Gal	Rbfox1,_A2BP1	Rbfox1	Rbfox1	RBP	TRiP.JF02600	BL27286	y	flightless	strong	-1	164	156	0	1	3	4
Mef2Gal	Rbfox1,_A2BP1	Rbfox1	Rbfox1	RBP	KK109100	V110518	early	lethalearly	strong	NA	0	0	0	0	0	0
Mef2Gal	Rbfox,_A2BP1	Rbfox1	Rbfox1	RBP,_RRM	TRiP.HMS00478	BL32476	y	weakflier	weak	0.541667	96	8	2	12	20	54
Mef2Gal	Rbp9	Rbp9	Rbp9	RBM,_RRM	TRiP.JF03084	BL28669	y	no	no	0.755102	49	3	0	3	21	22
Mef2Gal	Rbp9	Rbp9	Rbp9	RBM,_RRM	TRiP.GL01167	BL42796	y	no	no	0.843137	51	2	1	1	12	35
Mef2Gal	Rbp9	Rbp9	Rbp9	RBP	KK109093	V101412	y	no	no	0.813953	43	0	1	3	12	27
Mef2Gal	Rm62	Rm62	Rm62	RBP,_RNA_helicase	TRiP.JF01385	BL31395	pupal	lethalpupal	strong	NA	0	0	0	0	0	0
Mef2Gal	Rm62	Rm62	Rm62	RBP,_RNA_helicase	TRiP.HMS00144	BL34829	latepupal	lethallatepupal	strong	NA	0	0	0	0	0	0
Mef2Gal	Rm62	Rm62	Rm62	RBP,_RNA_helicase	KK112269	V110102	early	lethalearly	strong	NA	0	0	0	0	0	0
Mef2Gal	Rm62	Rm62	Rm62	RBP,_RNA_helicase	GD17219	V46908	lethal	lethal	strong	1	2	0	0	0	0	2
Mef2Gal	Hrb59	rump	rump	RBP	GD14202	V44659	y	weakflier	weak	0.122807	57	7	5	13	16	16
Mef2Gal	sbr	sbr	sbr	RBP,_nuclear_export_factor	KK100882	V103715	y	flightless	strong	-0.541284	109	73	9	2	7	18
Mef2Gal	sbr	sbr	sbr	RBP,_nuclear_export_factor	GD9182	V32690	pupal	lethalpupal	strong	NA	0	0	0	0	0	0
Mef2Gal	sbr	sbr	sbr	RBP,_nuclear_export_factor	GD9182	V32691	early	lethalearly	strong	NA	0	0	0	0	0	0
Mef2Gal	sbr	sbr	sbr	RBP,_nuclear_export_factor	GD14541	V46117	y	no	no	0.869565	46	0	0	3	8	35
Mef2Gal	SF1	SF1	SF1	RBP,_KH,_Znf,_spliceosome	TRiP.JF02871	BL28036	y	no	no	0.791667	48	5	0	0	6	37
Mef2Gal	SF1	SF1	SF1	RBP,_KH,_Znf,_spliceosome	TRiP.HMC03680	BL52938	pupal	lethalpupal	strong	NA	0	0	0	0	0	0
Mef2Gal	SF1	SF1	SF1	RBP,_KH,_Znf,_spliceosome	GD5176	V13425	y	weakflier	weak	0.42029	69	16	0	4	13	36
Mef2Gal	SF1	SF1	SF1	RBP,_KH,_Znf,_spliceosome	GD5176	V13426	y	flightless	strong	-0.314286	35	15	5	3	5	7
Mef2Gal	Sf3a2	Sf3a2	Sf3a2	Spliceosome	TRiP.HMC03799	BL55650	pupal	flightless	strong	-1	4	2	1	1	0	0
Mef2Gal	Sf3a2	Sf3a2	Sf3a2	Spliceosome	GD7087	V31346	pupal	flightless	strong	-1	3	3	0	0	0	0
Mef2Gal	Sf3a2	Sf3a2	Sf3a2	Spliceosome	GD7087	V31347	pharate	flightless	strong	-1	47	47	0	0	0	0
Mef2Gal	Sf3b1	Sf3b1	Sf3b1	spliceosome	TRiP.HMS00055	BL33650	y	no	no	0.862069	29	2	0	0	1	26
Mef2Gal	Sf3b2	Sf3b2	Sf3b2	Spliceosome	TRiP.HMS00056	BL33651	y	no	no	0.818182	110	3	1	6	22	78
Mef2Gal	Sf3b2	Sf3b2	Sf3b2	Spliceosome	KK101239	V105639	early	lethalearly	strong	NA	0	0	0	0	0	0
Mef2Gal	Sf3b2	Sf3b2	Sf3b2	Spliceosome	GD11027	V26250	early	lethalearly	strong	NA	0	0	0	0	0	0
Mef2Gal	Sf3b2	Sf3b2	Sf3b2	Spliceosome	GD11027	V26252	early	lethalearly	strong	NA	0	0	0	0	0	0
Mef2Gal	Sf3b3	Sf3b3	Sf3b3	Spliceosome	TRiP.HMS00614	BL33731	y	weakflier	weak	0.428571	14	0	2	2	2	8
Mef2Gal	Smn	Smn	Smn	RBP,_Tudor	TRiP.HMC03832	BL55158	latepupal	lethallatepupal	strong	NA	0	0	0	0	0	0
Mef2Gal	snf,_SNRPA	snf	snf	RBP,_RRM,_spliceosome	TRiP.HMC03197	BL51459	pupal	lethalpupal	strong	NA	0	0	0	0	0	0
Mef2Gal	snf,_SNRPA	snf	snf	RBP,_RRM,_spliceosome	TRiP.HMC04200	BL55914	pupal	lethalpupal	strong	NA	0	0	0	0	0	0
Mef2Gal	snf,_SNRPA	snf	snf	RBP,_RRM,_spliceosome	KK107649	V104334	lethal	lethal	strong	NA	0	0	0	0	0	0
Mef2Gal	snf,_SNRPA	snf	snf	RBP,_RRM,_spliceosome	VSH330329	V330329	y	weakflier	weak	0.733333	51	8	0	1	12	30
Mef2Gal	Rbm17,_Spf45	Rbm17	Spf45	RBM,_RRM	TRiP.HMS02351	BL41954	y	weakflier	weak	0.619048	42	7	0	1	8	26
Mef2Gal	Rbm17,_Spf45	Rbm17	Spf45	RBM,_RRM	GD9411	V32948	y	weakflier	weak	0.676471	68	3	1	7	10	47
Mef2Gal	Rbm17,_Spf45	Rbm17	Spf45	RBM,_RRM	GD9411	V32949	y	weakflier	weak	0.55	40	5	0	4	9	22
Mef2Gal	Spx,_Sf3b4	Spx	Spx	RBP,_RRM,_spliceosome	TRiP.HMJ23875	BL62421	early	lethalearly	strong	NA	0	0	0	0	0	0
Mef2Gal	YT521-B	YT521-B	Ythdc1	RBP	TRiP.HMS01302	BL34627	y	no	no	0.859813	214	7	2	6	20	179
Mef2Gal	YT521-B	YT521-B	Ythdc1	RBP	VSH330558	V330558	y	weakflier	weak	0.413333	150	14	10	20	51	55
Mef2Gal	w1118	w1118	Zcontrol	control	control	BL5905	y	no	no	0.955752	826	20	4	11	177	614
Mef2Gal	Zsalm	salm	Zsalm	TF	GD1525	V3029	y	flightless	strong	-0.897059	272	254	3	1	3	11
Act88FGal	Atx2	Atx2	Atx2	RBP,_SM	TRiP.HMS01392	BL36114	y			-0.628571	70	54	1	2	6	7
Act88FGal	Atx2	Atx2	Atx2	RBP,_SM	TRiP.HMS02726	BL44012	latepupal			NA	0	0	0	0	0	0
Act88FGal	Atx2	Atx2	Atx2	RBP,_SM	KK100423	V108843	y			-0.942857	35	34	0	0	0	1
Act88FGal	Bru1,_Aret	bru1	bru1	RBP,_RRM	GD8699	V41568	y			-1	68	68	0	0	0	0
Act88FGal	Cdc5	Cdc5	Cdc5	Spliceosome	TRiP.HMC02918	BL44524	latepupal			NA	0	0	0	0	0	0
Act88FGal	Cdc5	Cdc5	Cdc5	Spliceosome	TRiP.HMC03948	BL55261	y			0.6125	160	18	7	6	20	109
Act88FGal	Sart1_(CG6686)	Sart1	CG6686	Spliceosome	TRiP.HMC03913	BL55202	lethal			NA	0	0	0	0	0	0
Act88FGal	U2SURP_(CG9346)	U2SURP	CG9346	Spliceosome	TRiP.HMC04119	BL56898	y			0.71831	142	8	2	10	17	105
Act88FGal	U2SURP_(CG9346)	U2SURP	CG9346	Spliceosome	GD14191	V27013	y			-0.319035	373	211	9	26	15	112
Act88FGal	doa	Doa	Doa	enzyme,_splicing_associated_(SR_protein_targets)	TRiP.HMJ03121	BL50903	latepupal			NA	0	0	0	0	0	0
Act88FGal	doa	Doa	Doa	enzyme,_splicing_associated_(SR_protein_targets)	KK111879	V102520	y			-0.297297	74	27	6	15	17	9
Act88FGal	doa	Doa	Doa	enzyme,_splicing_associated_(SR_protein_targets)	GD8588	V19066	latepupal			-1	5	5	0	0	0	0
Act88FGal	doa	Doa	Doa	enzyme,_splicing_associated_(SR_protein_targets)	GD16021	V46449	y			0.343284	67	20	0	2	0	45
Act88FGal	fand	fand	fand	spliceosome	KK101751	V104186	latepupal			NA	0	0	0	0	0	0
Act88FGal	fand	fand	fand	spliceosome	GD11858	V46312	latepupal			NA	0	0	0	0	0	0
Act88FGal	How	how	how	RBP	KK100775	V37342	y			-0.47541	61	29	8	8	5	11
Act88FGal	How	how	how	RBP	GD13756	V1462	y			0.733333	30	2	0	2	7	19
Act88FGal	How	how	how	RBP	TRiPHMC03820	BL55665	lethal			0.272727	11	2	0	2	3	4
Act88FGal	How	how	how	RBP	KK100775	V35810	y			-0.466667	60	29	4	11	12	4
Act88FGal	Hrb87F,_hnRNP_A	Hrb87F	Hrb87F	RBP,_RRM,_hnRNP-A,_spliceosome	KK108162	V100732	latepupal			-1	12	11	0	1	0	0
Act88FGal	mbl	mbl	mbl	RBP	TRiP.JF03264	BL29585	y			0.767442	43	5	0	0	10	28
Act88FGal	mbl	mbl	mbl	RBP	KK107778	V105486	y			0.793103	29	3	0	0	7	19
Act88FGal	mbl	mbl	mbl	RBP	GD13374	V28732	y			0.589744	39	8	0	0	0	31
Act88FGal	me31B	me31B	me31B	RBP	TRiP.GL00695	BL38923	latepupal			-1	1	1	0	0	0	0
Act88FGal	me31B	me31B	me31B	RBP	TRiP.HM05052	BL28566	latepupal			NA	0	0	0	0	0	0
Act88FGal	me31B	me31B	me31B	RBP	TRiP.HMS00539	BL33675	latepupal			NA	0	0	0	0	0	0
Act88FGal	mub	mub	mub	RBP,_KH	TRiP.HMS00189	BL34874	y			-0.74359	117	82	8	12	8	7
Act88FGal	noi,_Sf3a3	noi	noi	spliceosome	TRiP.HMS00163	BL34845	pharate			-0.724868	189	146	3	14	2	24
Act88FGal	noi,_Sf3a3	noi	noi	spliceosome	KK101842	V105354	y			0.894737	38	1	0	1	0	36
Act88FGal	noi,_Sf3a3	noi	noi	spliceosome	GD9855	V20943	pharate			0.5	12	1	0	2	0	9
Act88FGal	noi,_Sf3a3	noi	noi	spliceosome	GD9855	V20945	pharate			0.5	24	2	0	4	0	18
Act88FGal	orb	orb	orb	RBP,_RRM	TRiP.JF01864	BL25843	y			0.956522	92	2	0	0	13	77
Act88FGal	orb	orb	orb	RBP,_RRM	TRiP.GL01484	BL43143	y			0.745763	118	11	1	3	10	93
Act88FGal	Prp19	Prp19	Prp19	spliceosome	TRiP.HMS00652	BL32865	latepupal			NA	0	0	0	0	0	0
Act88FGal	Prp19	Prp19	Prp19	spliceosome	KK101335	V108575	latepupal			NA	0	0	0	0	0	0
Act88FGal	Prp19	Prp19	Prp19	spliceosome	GD11681	V22147	latepupal			NA	0	0	0	0	0	0
Act88FGal	Prp19	Prp19	Prp19	spliceosome	GD11681	V41438	latepupal			NA	0	0	0	0	0	0
Act88FGal	Rbfox1,_A2BP1	Rbfox1	Rbfox1	RBP,_RRM	TRiP.JF02600	BL27286	y			-0.0518519	135	60	4	7	33	31
Act88FGal	Rbfox1,_A2BP1	Rbfox1	Rbfox1	RBP,_RRM	TRiP.HMS00478	BL32476	y			0.725	160	15	1	6	23	115
Act88FGal	Rbfox1,_A2BP1	Rbfox1	Rbfox1	RBP,_RRM	KK109100	V110518	y			-0.937778	225	211	2	5	4	3
Act88FGal	Rbp9	Rbp9	Rbp9	RBM,_RRM	TRiP.JF03084	BL28669	y			0.818182	55	2	1	2	11	39
Act88FGal	Rbp9	Rbp9	Rbp9	RBM,_RRM	TRiP.GL01167	BL42796	y			0.714286	35	2	0	3	7	23
Act88FGal	Rbp9	Rbp9	Rbp9	RBM,_RRM	KK109093	V101412	y			0.72093	43	4	1	1	8	29
Act88FGal	Rm62	Rm62	Rm62	RBP,_RNA_helicase	TRiP.JF01385	BL31395	y			-0.210884	147	81	1	7	12	46
Act88FGal	Rm62	Rm62	Rm62	RBP,_RNA_helicase	TRiP.HMS00144	BL34829	y			-1	30	30	0	0	0	0
Act88FGal	Rm62	Rm62	Rm62	RBP,_RNA_helicase	KK112269	V110102	lethal			NA	0	0	0	0	0	0
Act88FGal	Rm62	Rm62	Rm62	RBP,_RNA_helicase	GD17219	V46908	pharate			NA	0	0	0	0	0	0
Act88FGal	sbr	sbr	sbr	RBP,_nuclear_export_factor	KK100882	V103715	y			-0.185185	162	79	7	10	3	63
Act88FGal	sbr	sbr	sbr	RBP,_nuclear_export_factor	GD9182	V32690	pharate			-1	3	2	0	1	0	0
Act88FGal	sbr	sbr	sbr	RBP,_nuclear_export_factor	GD9182	V32691	pharate			-0.358491	53	32	4	0	0	17
Act88FGal	sbr	sbr	sbr	RBP,_nuclear_export_factor	GD14541	V46117	y			-0.220779	77	32	8	7	4	26
Act88FGal	SF1	SF1	SF1	RBP,_KH,_Znf,_spliceosome	TRiP.HMC03680	BL52938	latepupal			NA	0	0	0	0	0	0
Act88FGal	Sf3a2	Sf3a2	Sf3a2	Spliceosome	TRiP.HMC03799	BL55650	latepupal			NA	0	0	0	0	0	0
Act88FGal	Sf3a2	Sf3a2	Sf3a2	Spliceosome	GD7087	V31346_	latepupal			NA	0	0	0	0	0	0
Act88FGal	Sf3a2	Sf3a2	Sf3a2	Spliceosome	GD7087	V31347	pharate			0.241379	29	3	0	8	0	18
Act88FGal	Sf3b1	Sf3b1	Sf3b1	Spliceosome	TRiP.HMS00055	BL33650	latepupal			NA	0	0	0	0	0	0
Act88FGal	Sf3b2	Sf3b2	Sf3b2	Spliceosome	TRiP.HMS00056	BL33651	y			0.437751	249	62	1	7	24	155
Act88FGal	Sf3b2	Sf3b2	Sf3b2	Spliceosome	KK101239	V105639	latepupal			-1	2	2	0	0	0	0
Act88FGal	Sf3b2	Sf3b2	Sf3b2	Spliceosome	GD11027	V26250	latepupal			-1	4	2	0	2	0	0
Act88FGal	Sf3b3	Sf3b3	Sf3b3	Spliceosome	TRiP.HMS00614	BL33731	y			0.480519	77	13	2	5	11	46
Act88FGal	Smn	Smn	Smn	RBP,_Tudor	TRiP.HMC03832	BL55158	y			-1	48	48	0	0	0	0
Act88FGal	snf,_SNRPA	snf	snf	RBP,_RRM,_spliceosome	TRiP.HMC03197	BL51459	latepupal			NA	0	0	0	0	0	0
Act88FGal	snf,_SNRPA	snf	snf	RBP,_RRM,_spliceosome	TRiP.HMC04200	BL55914	latepupal			NA	0	0	0	0	0	0
Act88FGal	snf,_SNRPA	snf	snf	RBP,_RRM,_spliceosome	KK107649	V104334	lethal			NA	0	0	0	0	0	0
Act88FGal	Spx,_Sf3b4	Spx	Spx	RBP,_RRM,_spliceosome	TRiP.HMJ23875	BL62421	lethal			NA	0	0	0	0	0	0
Act88FGal	w1118	Zcontrol	Zcontrol	control	control	BL5905	y			0.5	260	41	10	14	51	144
Act88FGal	salm	Zsalm	Zsalm	TF	GD1525	V3029	y			-0.974937	399	387	5	2	0	5
